# Supplementary material for: Diatom phytochromes integrate the entire visible light spectra for photosensing in marine environments
Source: Research Square preprint supplement (doi:10.21203/rs.3.rs-3167205/v1), 2023-07-24
Supplement: Supplementary file 1 [file 3c5ca9f74a28d744491f639a.pdf]

Supplementary information for :

“Diatom phytochromes integrate the entire visible light spectra for photosensing in marine environments”, Duchêne et al.,

1. Supplementary Method
2. Extended Data Figures
3. Extended Data Tables

Supplementary Data 1: (separate excel file)

Sheet 1: list of diatom genetic resources used in this study, Sheet2: Sequences of diatom phytochromes used to build hmm models, Sheet 3: Sequences of diatom aureochromes used to build hmm models. Sheet 4 and 5: Sequences of the *Tara* Oceans gene catalog (MATOU2-v2) identified as diatom aureochromes and diatom phytochromes. Sheet 6: List of *Tara* Oceans diatom MAGs with detected diatom aureochromes and diatom phytochromes presence.

## Supplementary Method: Detailed description of DPH activity model construction based on equations described in (Mancinelli, 1994) (13)

### Phytochrome model

Monomer:

In a model where phytochrome is acting as a monomer, phytochrome equilibrium can be theorized as the equilibrium between the Pfr→Pr transition (rate constant k1) and the Pr→Pfr reverse reaction (rate constant k2) with the following scheme:

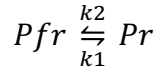

The rate constant of phytochrome photoconversion depends on phytochrome extinction coefficient, photoconversion yield and on light intensity, so k1 and k2 can be expressed as:

$$k_1 = N * \sigma_{Pfr} = N * 2.3 * \epsilon_{Pfr} * \phi_{Pfr} \text{ and } k_2 = N * 2.3 * \epsilon_{Pr} * \phi_{Pr}$$

where  $N$  is the fluence rate, or light intensity ( $\mu\text{mol photon.m}^{-2}.\text{s}^{-1}$ ), and  $\sigma_{Pfr}$  is the photoconversion cross-section of the Pfr→Pr reaction,  $\epsilon_{Pfr}$  is the extinction coefficient of Pfr and  $\phi_{Pfr}$  the quantum yield of the Pfr→Pr reaction;  $\sigma_{Pr}$  is the photoconversion cross-section of the Pr→Pfr reaction,  $\epsilon_{Pr}$  is the extinction coefficient of Pr and  $\phi_{Pr}$  the quantum yield of the Pr→Pfr reaction.

At equilibrium, we have  $\frac{dPrPr}{dt} = k_1 * Pfr - k_2 * Pr = 0$

Considering that the total amount of phytochrome  $P$  stays constant, i.e. synthesis and degradation are negligible, then  $P = Pr + Pfr$ , and we have:

$$\frac{Pr_{eq}}{P} = \frac{k_1}{k_1+k_2} = \frac{1}{1+\frac{k_2}{k_1}} = \frac{1}{1+\frac{\epsilon_{Pr} * \phi_{Pr}}{\epsilon_{Pfr} * \phi_{Pfr}}} = \frac{1}{1+\frac{\epsilon_{Pr} * \eta}{\epsilon_{Pfr}}} \quad (1)$$

$$\text{With } \eta = \frac{\phi_{Pr}}{\phi_{Pfr}}$$

Dimer:

In a model where phytochrome is acting as a dimer, the scheme becomes:

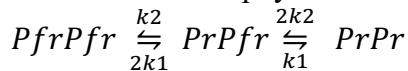

We have  $\frac{dPrPr}{dt} = k_1 * PrPfr - 2k_2 * PrPr$

At equilibrium,  $\frac{dPrPr}{dt} = 0$

Once again, we consider that  $P$  is constant,  $P = PrPr + PrPfr + PfrPfr$ , hence

$$\frac{PrPr_{eq}}{P} = \left(\frac{k_1}{k_1+k_2}\right)^2 = \frac{1}{(1+\frac{\epsilon_{Pr} * \phi_{Pr}}{\epsilon_{Pfr} * \phi_{Pfr}})^2} = \frac{1}{(1+\frac{\epsilon_{Pr} * \eta}{\epsilon_{Pfr}})^2} \quad (2)$$

$$\text{And } \frac{PfrPfr_{eq}}{P} = \left(\frac{k_2}{k_1+k_2}\right)^2 = \left(\frac{\frac{\epsilon_{Pr} * \phi_{Pr}}{\epsilon_{Pfr} * \phi_{Pfr}}}{1+\frac{\epsilon_{Pr} * \phi_{Pr}}{\epsilon_{Pfr} * \phi_{Pfr}}}\right)^2 \quad (3)$$

Integration of Equation 3 gives the following expression for PrPr as a function of time:

$$\frac{PrPr(t)}{P} = \left( \frac{k_1}{k_1+k_2} * \frac{PfrPfr(t0)}{P} + \frac{k_2}{k_1+k_2} * \frac{PrPr(t0)}{P} - \frac{k_1*k_2}{(k_1+k_2)^2} \right) e^{-2*(k_1+k_2)t} + \frac{k_1}{k_1+k_2} \left( \frac{PrPr(t0)}{P} - \frac{PfrPfr(t0)}{P} + \frac{k_2-k_1}{k_1+k_2} \right) e^{-(k_1+k_2)t} + \left( \frac{k_1}{k_1+k_2} \right)^2 \quad (4)$$

### Use of YFP signal as indicative of DPH activity: estimation of the ratio of quantum yield

In equation 1, 2 or 3,  $\epsilon_{Pr}/\epsilon_{Pfr}$  can be known from the recombinant PtDPH absorption spectra. The  $\epsilon_{Pr}/\epsilon_{Pfr}$  ratio, in both monochromatic and bichromatic illumination, as been determined with the LED spectra with:

$$\frac{\epsilon_{Pr,LED}}{\epsilon_{Pfr,LED}} = \frac{\sum_{\lambda=300}^{\lambda=900} A_{Pr,\lambda} * N_{\lambda}}{\sum_{\lambda=300}^{\lambda=900} A_{Pfr,\lambda} * N_{\lambda}}$$

where  $A_{Pr,\lambda}$  is the absorbance of Pr at wavelength  $\lambda$  measured with the recombinant protein, and  $N_{\lambda}$  the intensity of the LED measured at this wavelength.

We hypothesized that the YFP signal at saturating light is directly linked to phytochrome equilibrium. Our output measure is the YFP signal for a LED at wavelength  $\lambda$  at saturating intensities (the 4 points at highest light intensity were used), normalized between the signal from cells that went from constant green light (520 nm, growth condition) to darkness, and the signal of cells exposed 10 min to saturating far-red light (765 nm). This is expressed as following:

$$RelativeYFP(LED\lambda, sat) = \frac{YFP(LED\lambda, sat) - YFP(520nm)}{YFP(765nm, sat) - YFP(520nm)}$$

In a monomer model, Pr is the gene expression-inducing form<sup>6</sup>. If we consider that the YFP is linearly linked to Pr/P, we have:

$$RelativeYFP(LED\lambda, sat) = \frac{Pr_{eq,LED} - Pr_{eq,520nm}}{Pr_{eq,765nm} - Pr_{eq,520nm}} = \frac{\frac{1}{1 + \frac{\epsilon_{Pr,LED}}{\epsilon_{Pfr,LED}} * \eta} - \frac{1}{1 + \frac{\epsilon_{Pr,520}}{\epsilon_{Pfr,520}} * \eta}}{\frac{1}{1 + \frac{\epsilon_{Pr,765}}{\epsilon_{Pfr,765}} * \eta} - \frac{1}{1 + \frac{\epsilon_{Pr,520}}{\epsilon_{Pfr,520}} * \eta}} \quad (5)$$

In this equation,  $\eta$  is the only unknown.

To determine it, the equation was fitted with the nls function in R with  $\eta = 1$  as starting value, on the experimental values obtained from monochromatic illuminations (excluding the red illumination), see Extended Data Table 3 for the results.

In this monomer model, there is no mathematical difference whether Pr is actively inducing gene expression or if Pfr is actively repressing it; in both cases, Pr is the only form that allows genes to be expressed.

In a dimer model however, if we considering PrPr as the active form (i.e. only PrPr will allow gene expression), we expect the YFP to reflect PrPr/P. On the other hand, if we consider that PfrPfr is the active form, i.e. repressing gene expression, the gene induction will be a function of  $1 - \frac{PfrPfr}{P}$ .

These two cases can be put to equation as follow:

If we consider that the YFP is linearly linked to PrPr/P, then :

$$RelativeYFP(LED\lambda, sat) = \frac{PrPr_{eq,LED} - PrPr_{eq,520nm}}{PrPr_{eq,765nm} - PrPr_{eq,520nm}} \frac{\frac{1}{(1 + \frac{\epsilon_{Pr,LED}}{\epsilon_{Pfr,LED}} \eta)^2} - \frac{1}{(1 + \frac{\epsilon_{Pr,520}}{\epsilon_{Pfr,520}} \eta)^2}}{\frac{1}{(1 + \frac{\epsilon_{Pr,765}}{\epsilon_{Pfr,765}} \eta)^2} - \frac{1}{(1 + \frac{\epsilon_{Pr,520}}{\epsilon_{Pfr,520}} \eta)^2}} \quad (6)$$

(6)

If we consider that the YFP is linearly linked to 1-PfrPfr/P, then :

$$RelativeYFP(LED\lambda, sat) = \frac{PfrPfr_{eq,520nm} - PfrPfr_{eq,LED}}{PfrPfr_{eq,520nm} - PfrPfr_{eq,765nm}} \frac{\left(\frac{\frac{\epsilon_{Pr,520}}{\epsilon_{Pfr,520}} \eta}{1 + \frac{\epsilon_{Pr,520}}{\epsilon_{Pfr,520}} \eta}\right)^2 - \left(\frac{\frac{\epsilon_{Pr,LED}}{\epsilon_{Pfr,LED}} \eta}{1 + \frac{\epsilon_{Pr,LED}}{\epsilon_{Pfr,LED}} \eta}\right)^2}{\left(\frac{\frac{\epsilon_{Pr,520}}{\epsilon_{Pfr,520}} \eta}{1 + \frac{\epsilon_{Pr,520}}{\epsilon_{Pfr,520}} \eta}\right)^2 - \left(\frac{\frac{\epsilon_{Pr,765}}{\epsilon_{Pfr,765}} \eta}{1 + \frac{\epsilon_{Pr,765}}{\epsilon_{Pfr,765}} \eta}\right)^2} \quad (7)$$

Once again in these equations,  $\eta$  is the only unknown.

To determine it, the equation was fitted with the nls function in R with  $\eta = 1$  as starting value, on the experimental values obtained from monochromatic illuminations, (excluding the red illumination) see Extended Data Table 3 for the results.

The PrPr model was also tested on data including bichromatic illuminations, see Extended Data Table 3 for the results.

#### Use of YFP signal as indicative of DPH activity: sensitivity

From this point, we used the PrPr model. Sensitivity is here defined as the phytochrome photoconversion cross-section  $\sigma$ . In theory, we have the exponential constant in equation 4

$$(k_1 + k_2) = N * (\sigma_{Pfr} + \sigma_{Pr}) = N * \sigma \text{ and}$$

$$\sigma = 2.3 * \epsilon_{Pr} * \phi_{Pr} + 2.3 * \epsilon_{Pfr} * \phi_{Pfr} = A_{Pr} * \phi'_{Pr} + A_{Pfr} * \phi'_{Pfr}$$

With  $\phi'_{Pr}$  and  $\phi'_{Pfr}$  corresponding to the apparent photoconversion quantum yields.

The following equation was fitted to the YFP levels for each LED and each line (we used the ratio of photoconversion  $\eta$  estimated above to calculate PrPr in green and far-red):

$$RelativeYFP(LED\lambda, t) = \frac{PrPr(LED\lambda, t) - PrPr_{eq,520nm}}{PrPr_{eq,765nm} - PrPr_{eq,520nm}} = \left[ \left( \frac{A_{Pfr}\phi'_{Pfr}}{A_{Pfr}\phi'_{Pfr} + A_{Pr}\phi'_{Pr}} * \frac{PfrPfr(t_0)}{P} + \frac{A_{Pr}\phi'_{Pr}}{A_{Pfr}\phi'_{Pfr} + A_{Pr}\phi'_{Pr}} * \frac{PrPr(t_0)}{P} - \frac{A_{Pfr}\phi'_{Pfr} * A_{Pr}\phi'_{Pr}}{(A_{Pfr}\phi'_{Pfr} + A_{Pr}\phi'_{Pr})^2} \right) e^{-2 * (A_{Pfr}\phi'_{Pfr} + A_{Pr}\phi'_{Pr}) * N * t} + \frac{A_{Pfr}\phi'_{Pfr}}{A_{Pfr}\phi'_{Pfr} + A_{Pr}\phi'_{Pr}} \left( \frac{PrPr(t_0)}{P} - \frac{PfrPfr(t_0)}{P} + \frac{A_{Pr}\phi'_{Pr} - A_{Pfr}\phi'_{Pfr}}{A_{Pfr}\phi'_{Pfr} + A_{Pr}\phi'_{Pr}} \right) e^{-(A_{Pfr}\phi'_{Pfr} + A_{Pr}\phi'_{Pr}) * N * t} + \left( \frac{A_{Pfr}\phi'_{Pfr}}{A_{Pfr}\phi'_{Pfr} + A_{Pr}\phi'_{Pr}} \right)^2 - \frac{1}{\left(1 + \frac{A_{Pr,520}}{A_{Pfr,520}} \eta\right)^2} \right] / \left[ \frac{1}{\left(1 + \frac{A_{Pr,765}}{A_{Pfr,765}} \eta\right)^2} - \frac{1}{\left(1 + \frac{A_{Pr,520}}{A_{Pfr,520}} \eta\right)^2} \right]$$

(8)

where %PrPr at time 0 is either the equilibrium in green (for the induction spectra) or in far-red (for the reversion spectra),  $t$ , the time of illumination, i.e. 10 min,  $N$  the intensity  $N = \sum_{\lambda=300}^{\lambda=900} N_{\lambda}$

$\Phi'$ Pr and  $\Phi'$ Pfr are fitted for each LED and each line. For further analysis, we used the photoconversion cross section  $\sigma$  calculated from  $\Phi'$ Pr and  $\Phi'$ Pfr fitted values.

$$\sigma = A_{Pfr} \phi'_{Pfr} + A_{Pr} \phi'_{Pr}$$

In theory,  $\sigma$  should be a linear combination of ( $A_{Pr} * \eta + A_{Pfr}$ ) (dotted lined on Fig.2C).

$$\sigma = \alpha * (A_{Pr,LED} * \eta + A_{Pfr,LED})$$

where  $A_{Pr,LED} = \frac{\sum_{\lambda=300}^{\lambda=900} A_{Pr,\lambda} * N_{\lambda}}{\sum_{\lambda=300}^{\lambda=900} N_{\lambda}}$ , and  $\alpha$  is a constant

Fitting the linear relationship between  $\sigma$  and ( $A_{Pr} * \eta + A_{Pfr}$ ) with the lm function in R gave  $\alpha=0.015154 \pm 0.002613$  (adjusted  $R^2= 0.3855$ ) when considering all the data points (Figure 3C),  $\alpha=0.027574 \pm 0.004133$  (adjusted  $R^2= 0.6085$ ) when removing the data points above 700 nm and  $\alpha=0.0044465 \pm 0.0003856$  (adjusted  $R^2= 0.8461$ ) when considering only the data points above 700 nm. Given this difference, we estimated the DPH cross section  $\sigma$  in the natural environment as the sum of  $\sigma$  below and  $\sigma$  above 700 nm see also below).

### Projection of DPH activity

From the previous equations, we can calculate  $\%PrPr(t) = \frac{PrPr(t)}{P} * 100$  in a given environment. The light environment is described with  $I_{tot} = l * \sum_{\lambda=300}^{\lambda=900} N_{\lambda}$  with  $l$  the bandwidth and  $N_{\lambda}$  the intensity at wavelength  $\lambda$ .

The ratio of absorption is calculated with  $\frac{\epsilon_{Pr}}{\epsilon_{Pfr}} = \frac{\sum_{\lambda=300}^{\lambda=900} A_{Pr,\lambda} * N_{\lambda}}{\sum_{\lambda=300}^{\lambda=900} A_{Pfr,\lambda} * N_{\lambda}}$ , from which we can calculate the DPH equilibrium:

$$\%PrPr_{eq} = \frac{1}{(1 + \frac{\epsilon_{Pr}}{\epsilon_{Pfr}} * \eta)^2} * 100$$

( $\eta$  is either the value determined *in vivo* or *in vitro*)

We can calculate Pr and Pfr absorption in this environment with  $A_{Pr} = \frac{\sum_{\lambda=300}^{\lambda=900} A_{Pr,\lambda} * N_{\lambda}}{\sum_{\lambda=300}^{\lambda=900} N_{\lambda}}$ , from which we calculate the photoconversion cross-section

$\sigma = 0.027574 * (A_{Pr,\lambda < 700} * \eta + A_{Pfr,\lambda < 700}) + 0.0044465 * (A_{Pr,\lambda > 700} * \eta + A_{Pfr,\lambda > 700})$   
(this distinction is only relevant for real environmental data with  $\lambda$  from 350 to 800 nm, but not for modelled light fields,  $\lambda$  from 350 to 700 nm).

The rate constant displayed in Fig3.B is  $k = \sigma * I_{tot}$

We also calculated PrPr(t) with PrPr(t0)=0, PfrPfr(t0)=1 and

$$\frac{\text{PrPr}(t)}{P} = \left( \frac{k_1}{k_1 + k_2} * \frac{PfrPfr(t0)}{P} + \frac{k_2}{k_1 + k_2} * \frac{PrPr(t0)}{P} - \frac{k_1 * k_2}{(k_1 + k_2)^2} \right) e^{-2 * \sigma * Itot * t} \\ + \frac{k_1}{k_1 + k_2} \left( \frac{PrPr(t0)}{P} - \frac{PfrPfr(t0)}{P} + \frac{k_2 - k_1}{k_1 + k_2} \right) e^{-\sigma * Itot * t} + \left( \frac{k_1}{k_1 + k_2} \right)^2$$

From this, we calculated  $\sigma * Itot$  for which  $\text{PrPr}(t) \geq 0.9 \text{ PrPr}_{eq}$  as the limit for light detection by DPH, with  $t=10$  min, 1h or 12h.

## **Extended Data Figures**

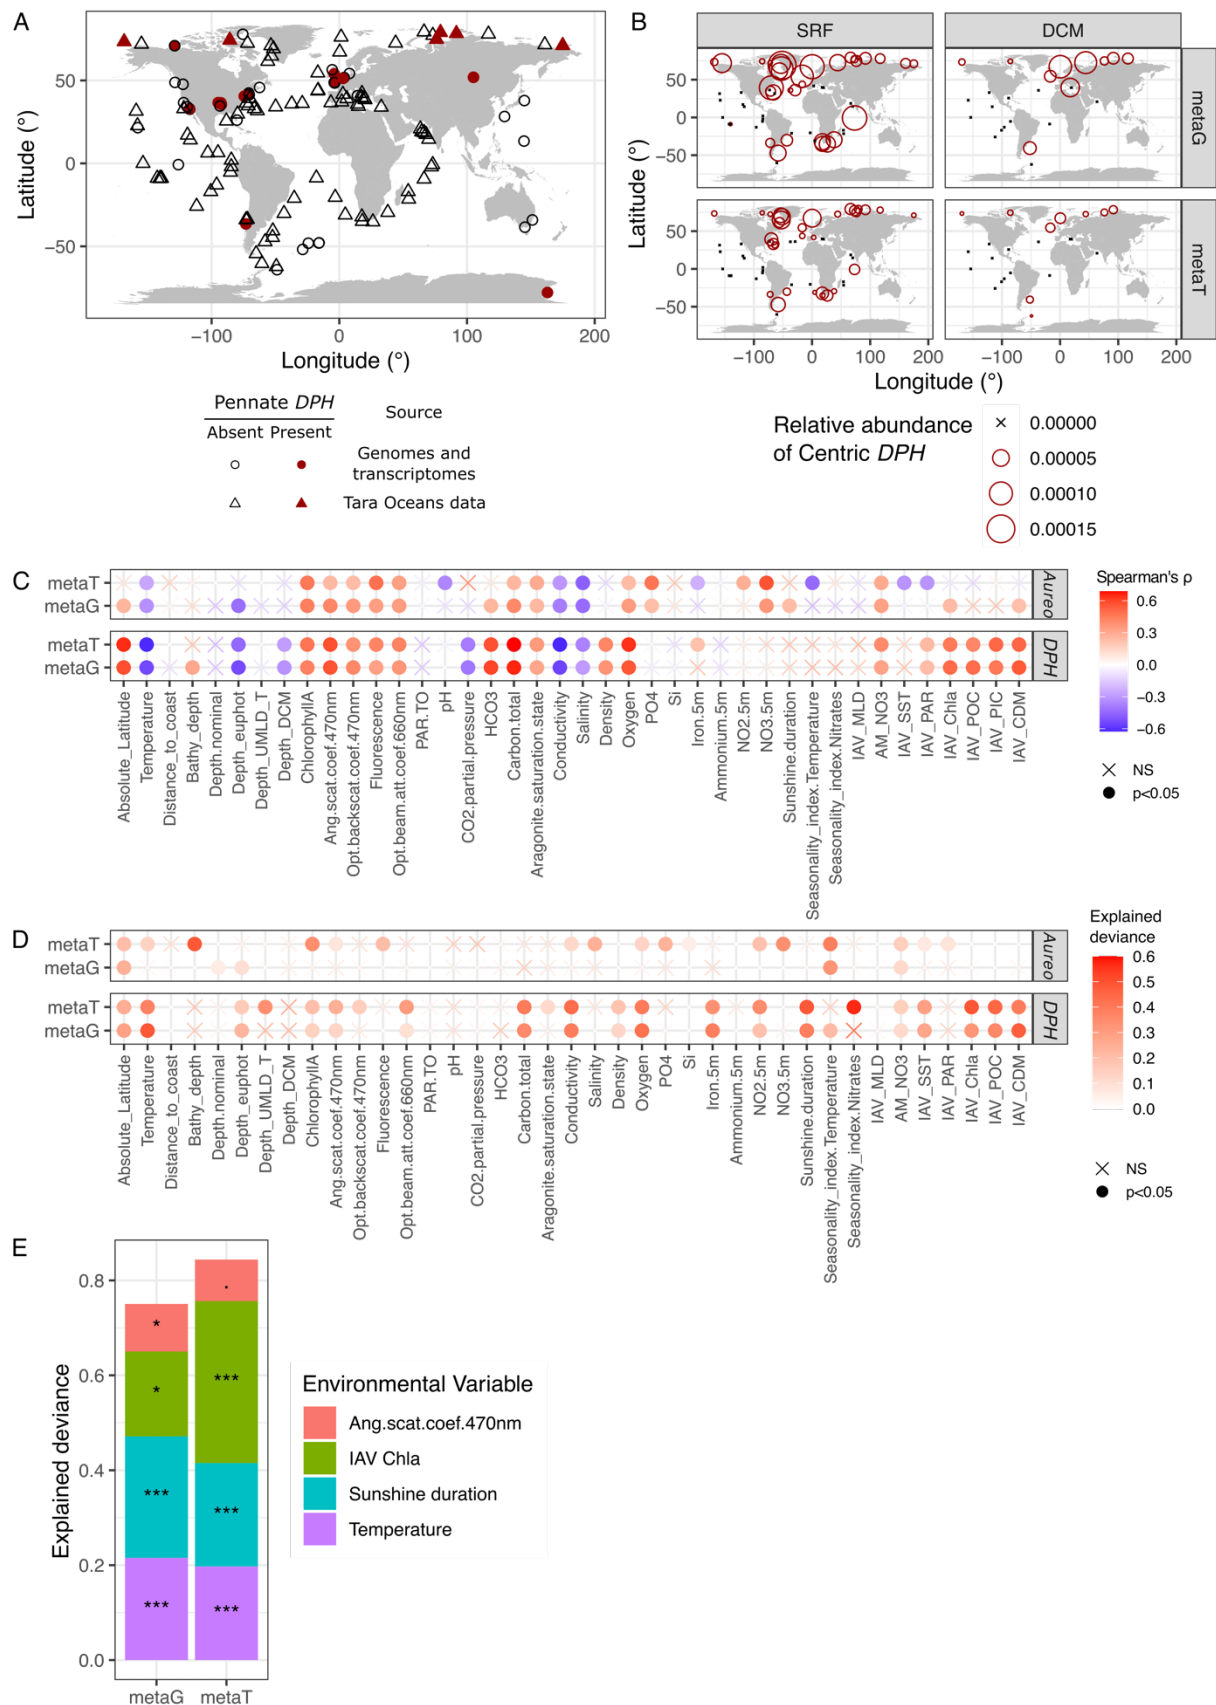



### Extended Data Fig.1

*DPH* distribution is linked to latitude, temperature and optical parameters. (A) Map of the presence and absence of pennate *DPH* genes based on *Tara* Oceans sequence data and sampling location of pennate diatom strains with and without *DPH*. (B to E) Analysis of centric *DPH* biogeography from *Tara* Oceans data: (B) Map of the abundance of centric *DPH* genes and transcripts in *Tara* Oceans sampling stations (SRF: surface samples, DCM: Deep Chlorophyll Maximum; metaT: meta-transcriptomic reads, metaG: meta-genomic reads). Abundance is relative to total centric diatom genes or transcripts. (C) Spearman's correlation of *AUREO* and *DPH* relative abundance (in meta-transcriptomic reads, metaT, and meta-genomic reads, metaG) with different environmental parameters. *DPH* MetaT and MetaG reads also significantly correlate with each other (Pearson's  $r=0.758$ ,  $p\text{-value}<<<0.01$ ) (D) Generalized additive models (GAM) of *AUREO* and *DPH* relative abundances with different environmental parameters. (E) Complex GAMs explaining *DPH* relative abundance with a combination of environmental parameters.

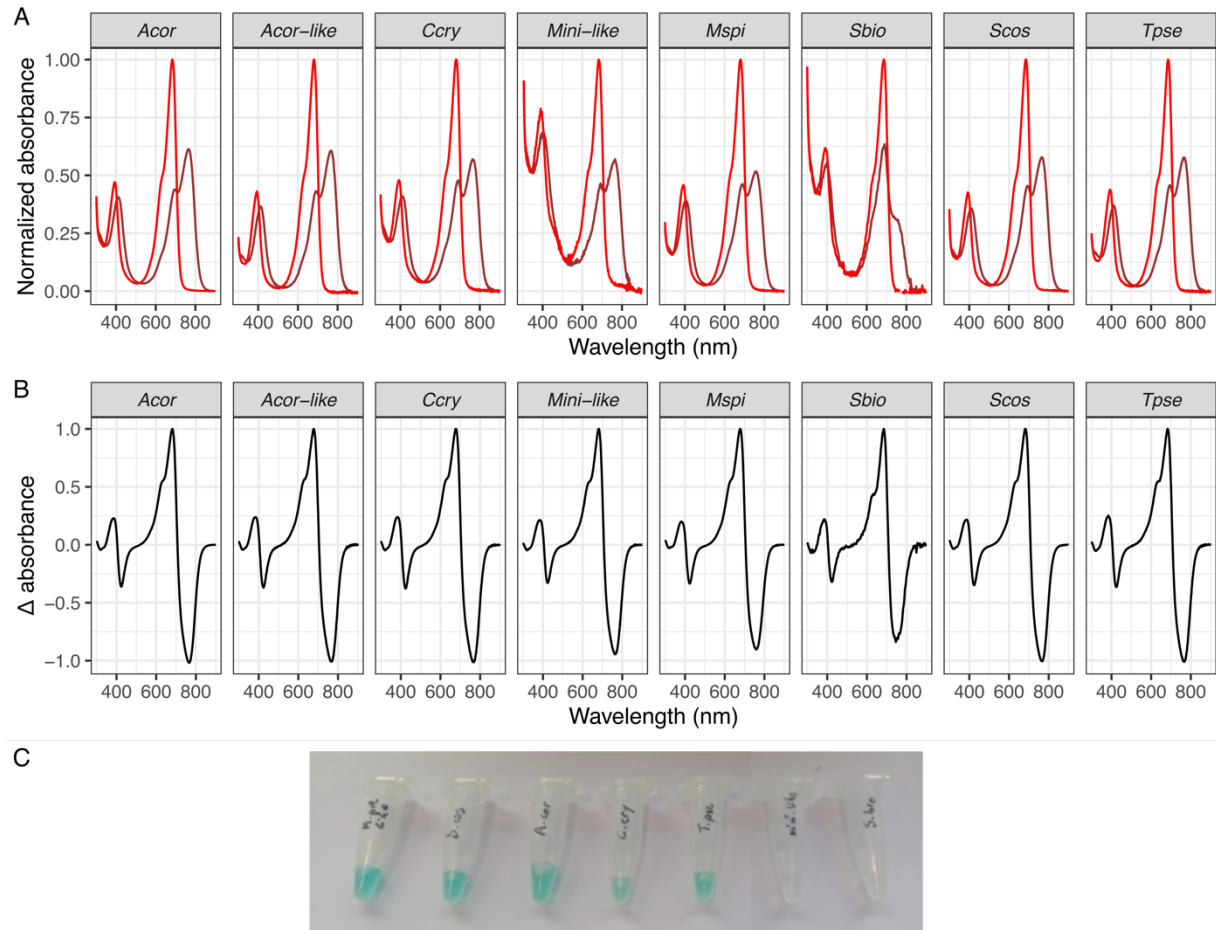

### Extended Data Fig.2

Spectral properties of DPH from various species are conserved. (A) Normalized absorption spectra of far-red light illuminated (red line) and red light illuminated (darker red line) recombinant photosensory domains of DPH expressed with biliverdin as the conjugate chromophore. (B) Normalized differential absorption spectra between red- and far-red- illuminated DPH. (C) Purified recombinant DPH. *Acor* *Arcocellulus cornucervus*, *Ccry* *Cyclotella cryptica*, *Mspi* *Minidiscus spinulatus*, *Sbio* *Shionodiscus bioculatus*, *Scos* *Skeletonema costatum*, *Tpse* *Thalassiosira pseudonana*; Mini-like: synthetic environmental sequence close to *M. spinulatus* DPH, Acor-like synthetic environmental sequence close to *A. cornucervus* DPH.

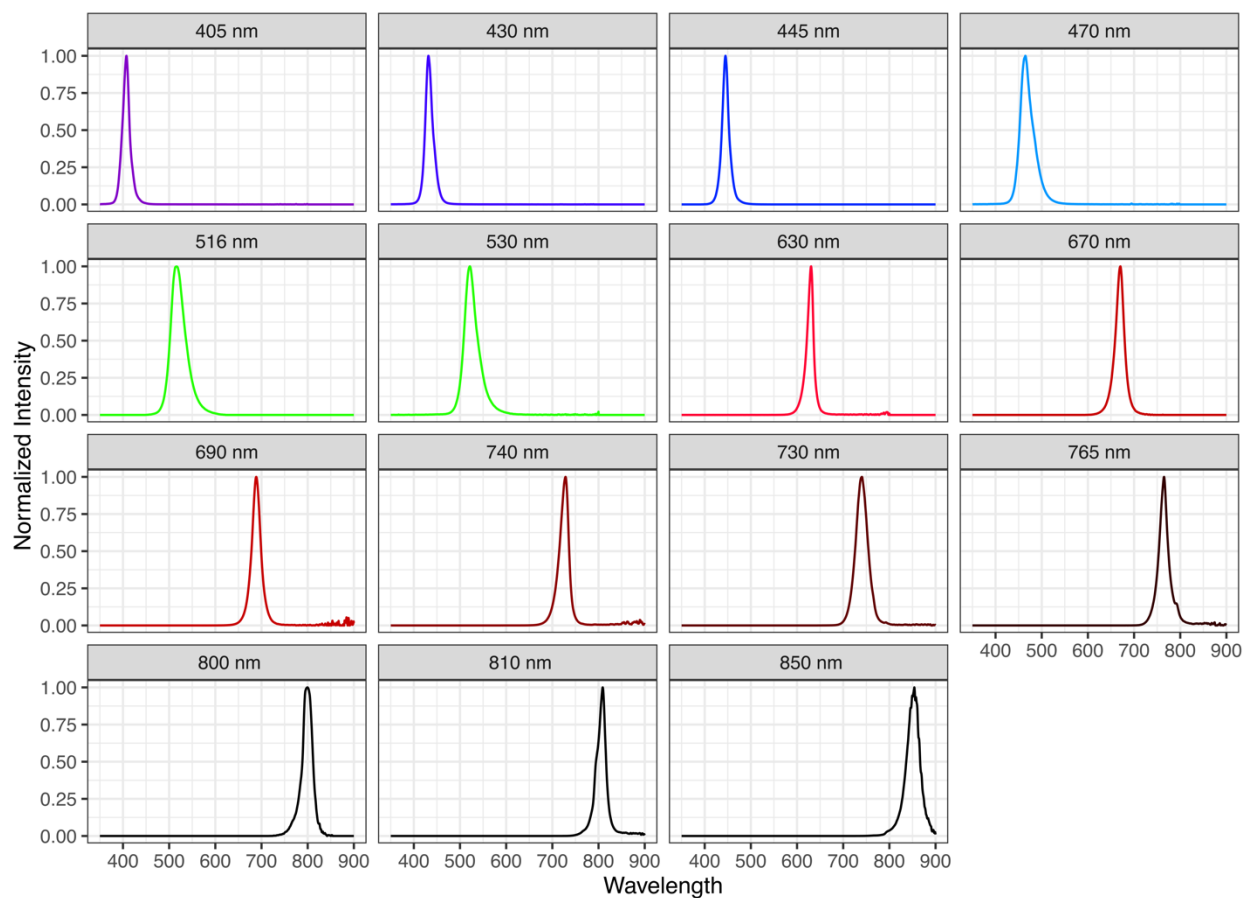

### Extended Data Fig.3

Emission spectra of the LED used in this study. Intensity ( $\text{photon} \cdot \text{m}^{-2} \cdot \text{s}^{-1}$ ) were normalized to the maximum for each LED.

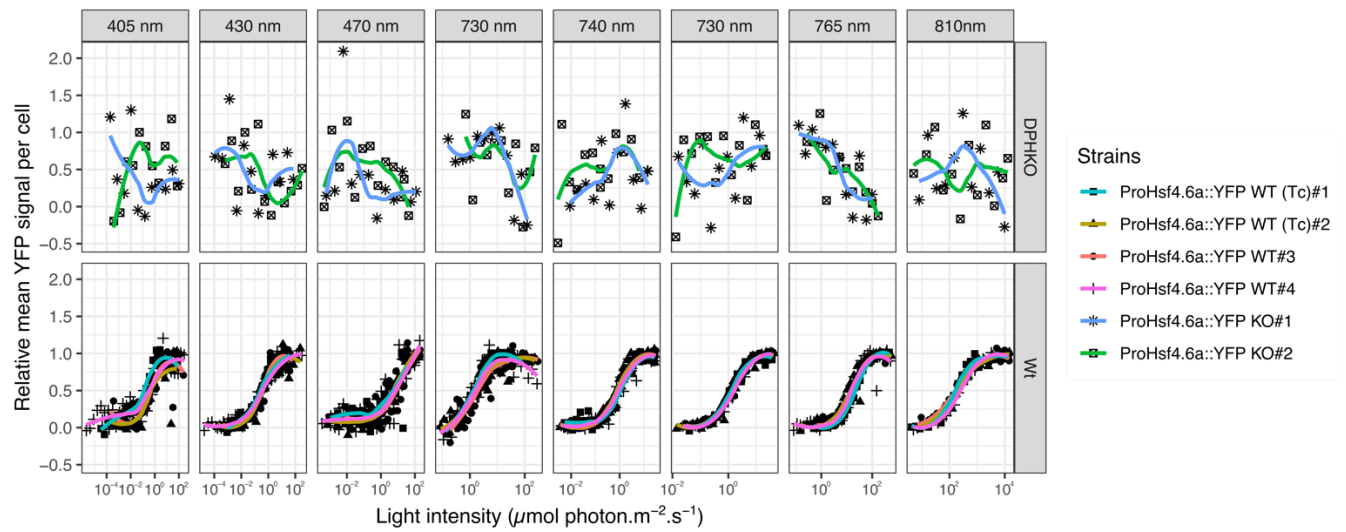

#### Extended Data Fig.4

The PtDPH response reporter system. Fluence rate-response curves induction of YFP in response to different lights in reporter lines with different genetic backgrounds: *P. tricornutum* wild-type (WT), knockout PtDPH mutants (KO), or non-mutated cells originated from the same transformed colony than the KO (WT (Tc), Transformation control). Cells were for 10 min exposed to an intensity gradient of monochromatic lights. YFP signal was measured after 6 h in the dark by flow cytometry and rescaled between minimum and maximum for each light treatment and each line (mean of the 3 minimum and the 3 maximum values). Curves represent the smooth trend (obtained with `geom_smooth` in R). WT panel are the same data as in Fig.2A with a different scaling for visualization.

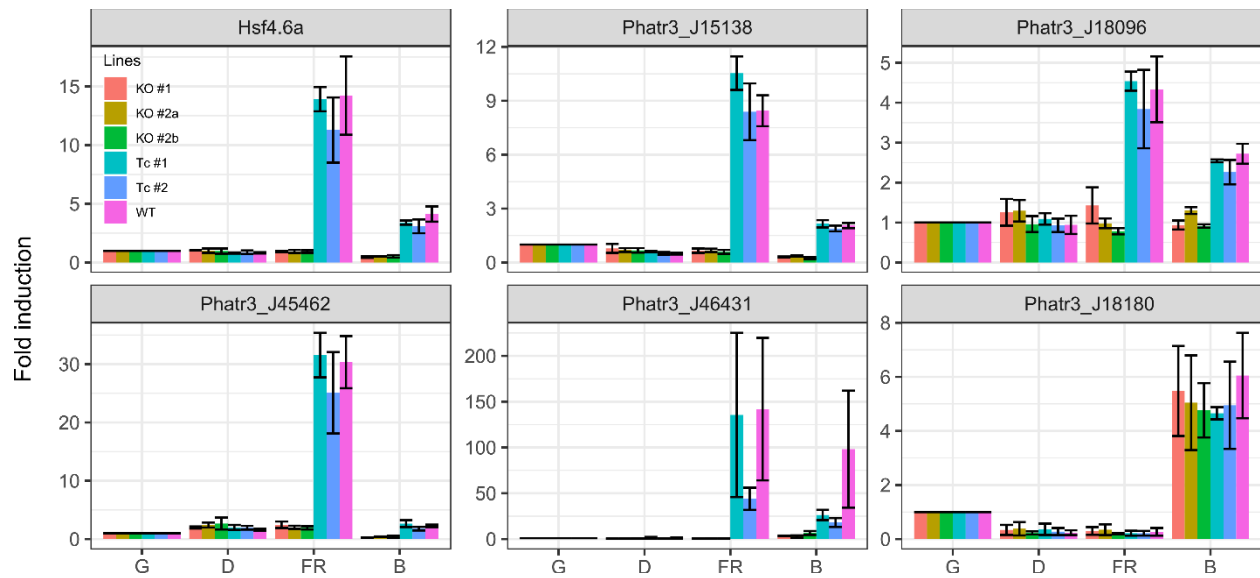

### Extended Data Fig.5

Expression analysis of PtDPH-regulated (*HSF4.6a*, Phatr3\_J15138, Phatr3\_J18096, Phatr3\_J45662, Phatr3\_J46431) and PtDPH-non regulated (Phatr3\_J18180) genes upon far-red and blue irradiation. *P. tricornutum* WT, DPH KO mutant and their corresponding non-mutated transformant (Tc) cells were collected in their continuous green light growth condition (G) and following a 30 min of irradiation with 445 nm LED at 30  $\mu\text{mol photon.m}^{-2}.\text{s}^{-1}$  (B) or 800 nm LED at 200  $\mu\text{mol photon.m}^{-2}.\text{s}^{-1}$  (FR) or kept in the dark for the same time (D). Gene expression quantifications were performed by RT-qPCR, with *H4* used as normalization and relativized to the green light condition. Values are the mean  $\pm$ se on 3 independent biological replicates.

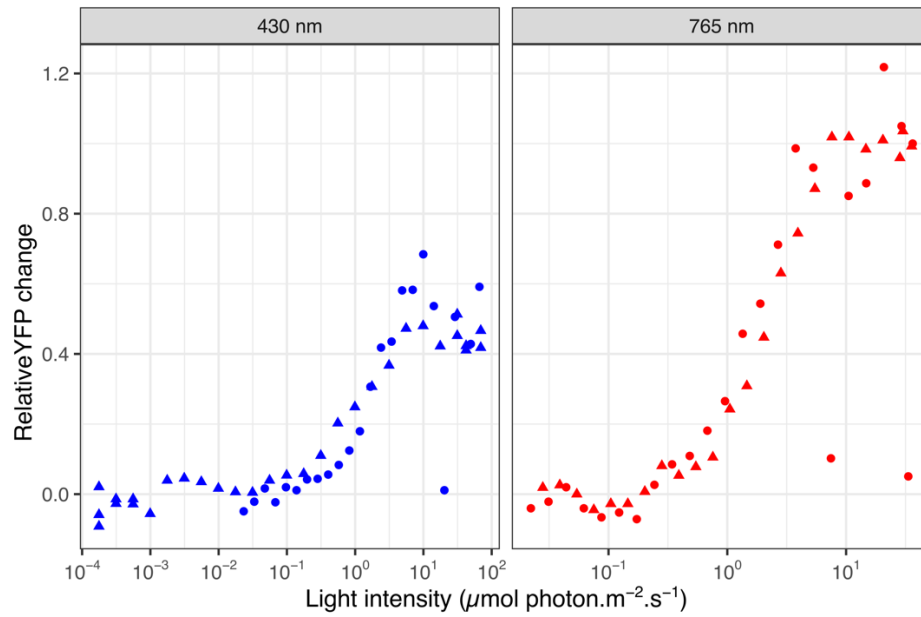

### Extended Data Fig.6

TpDPH restores blue and far-red-dependent YFP induction in PtDPH KO line. PtDPH KO reporter line KO #1 was transformed with Tp-*DPH* gene under the control of Pt-*DPH* promoter and terminator, and subjected to a gradient of blue (430 nm) or far-red (765 nm) lights, according to the same experimental setup used for the induction spectra. The YFP increase compared to value in the dark were normalized to the maximal YFP increase, i.e. after exposure to saturating 765 nm light. The different symbols represent data for 2 independent lines.

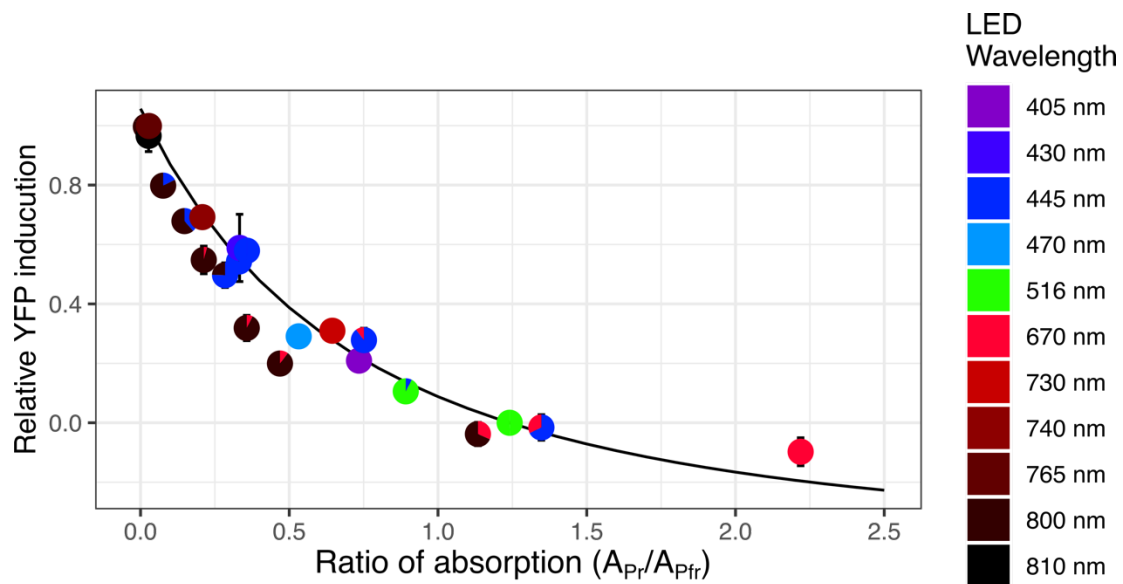

### Extended Data Fig.7

PtDPH activity in response to bichromatic illuminations. Plot showing relative YFP signal at saturating monochromatic lights (same data as in Fig.3.C) and response to mixed wavelengths. The black curve indicates the  $\eta$ . Pie charts indicate the relative intensity of each LED color. The mixed illumination demonstrate that PtDPH can detect variation of the R/FR ratio, but also the FR/B, B/R and B/G ratios. Values are means  $\pm$ se from the four independent WT lines

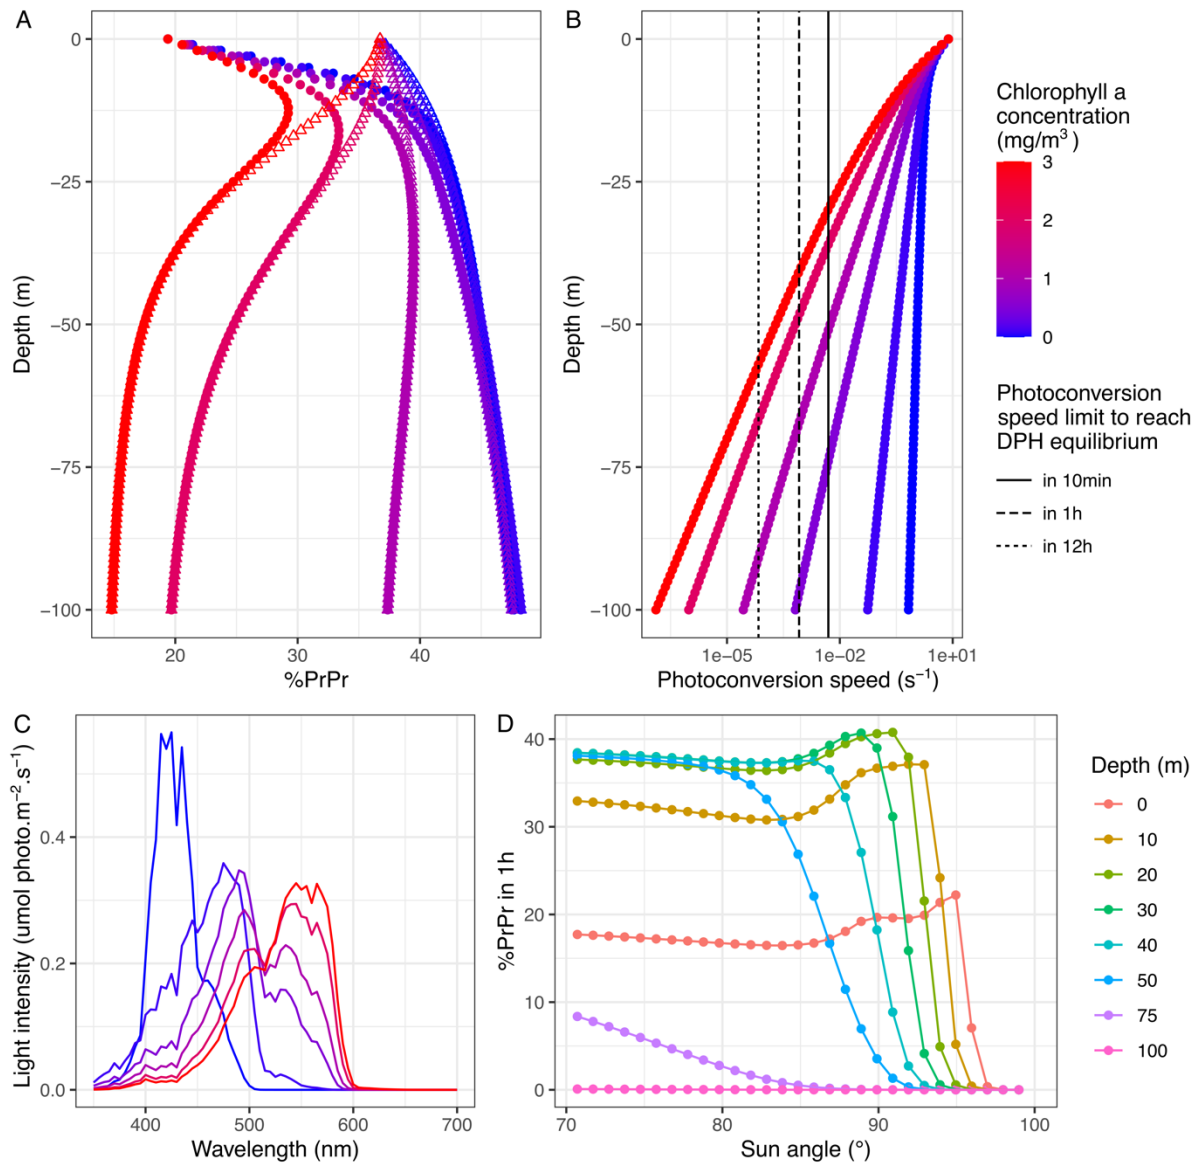

### Extended Data Fig.7

PtDPH activity in modeled light fields (350 to 700 nm) mimicking different underwater scenarios of phytoplankton concentration: (A) Proportion of %PrPr at depth and contribution of the red band (removing the red band, i.e. 350 to 600nm spectra, triangles), and (B) the corresponding photoconversion rate constant. Vertical lines indicate the limit for DPH to reach equilibrium in 12 h, 1 h or 10 min (from left to right). (C) Modelled light fields at the bottom of the photic zone (1% of surface irradiance) for sun at zenith. Chlorophyll a scale is the same for A, B and C. (D) DPH photoequilibrium upon 1 h of exposure of light spectrum at different depths and different solar zenith angle (Chla 1 mg/m<sup>3</sup>). Note the slight increase in %PrPr around 90° at 20 to 40 m deep.



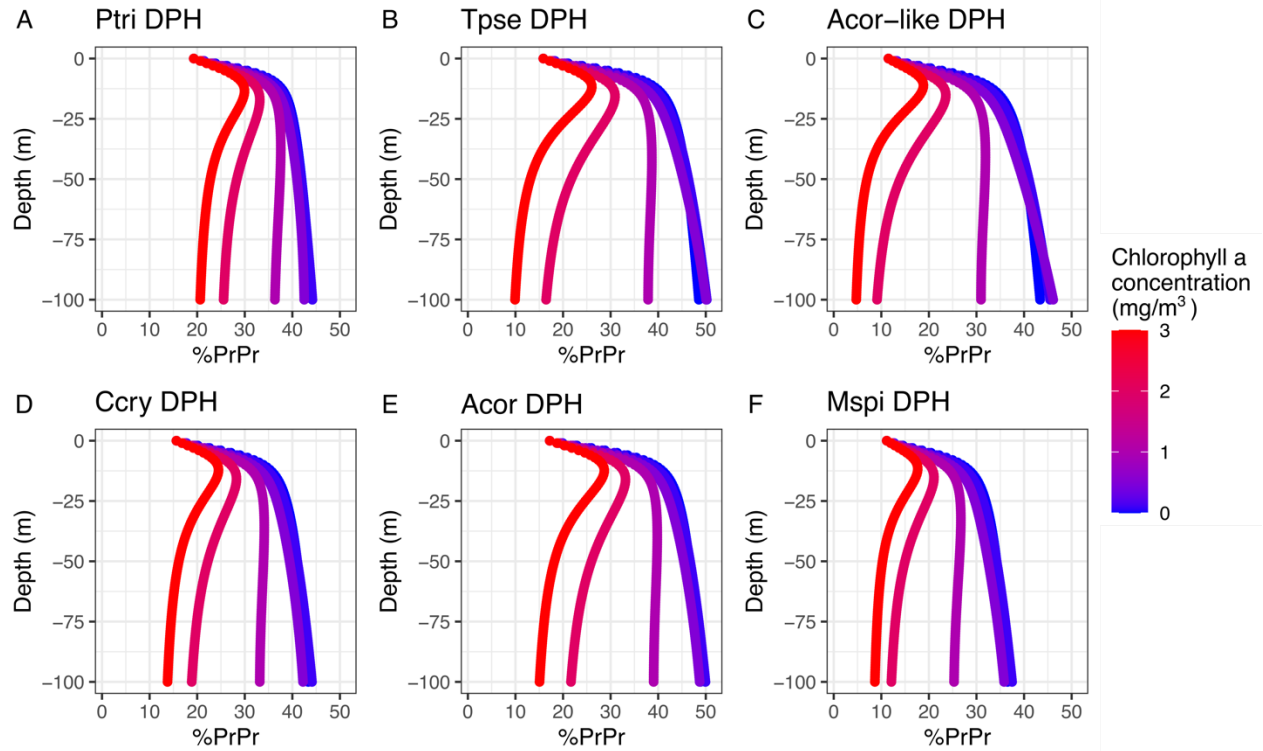

### Extended Data Fig.8

Projection of proportion of PrPr formed (%PrPr), in modeled light fields, with variations of chlorophyll a (Chl a) using properties of Ptri DPH (A), Tpse DPH (B), Acor-like synthetic DPH (C) Ccry DPH (D), Acor DPH (E) and Mspi DPH (F) determined *in vitro* from the recombinant protein absorption spectra (Extended Data Table2). The color legend is common to all panels. Note the influence of the absorption spectra (Pt DPH compared to Tp DPH) and the effect of the ratio of quantum yield (Acor DPH compared to Mspi DPH).

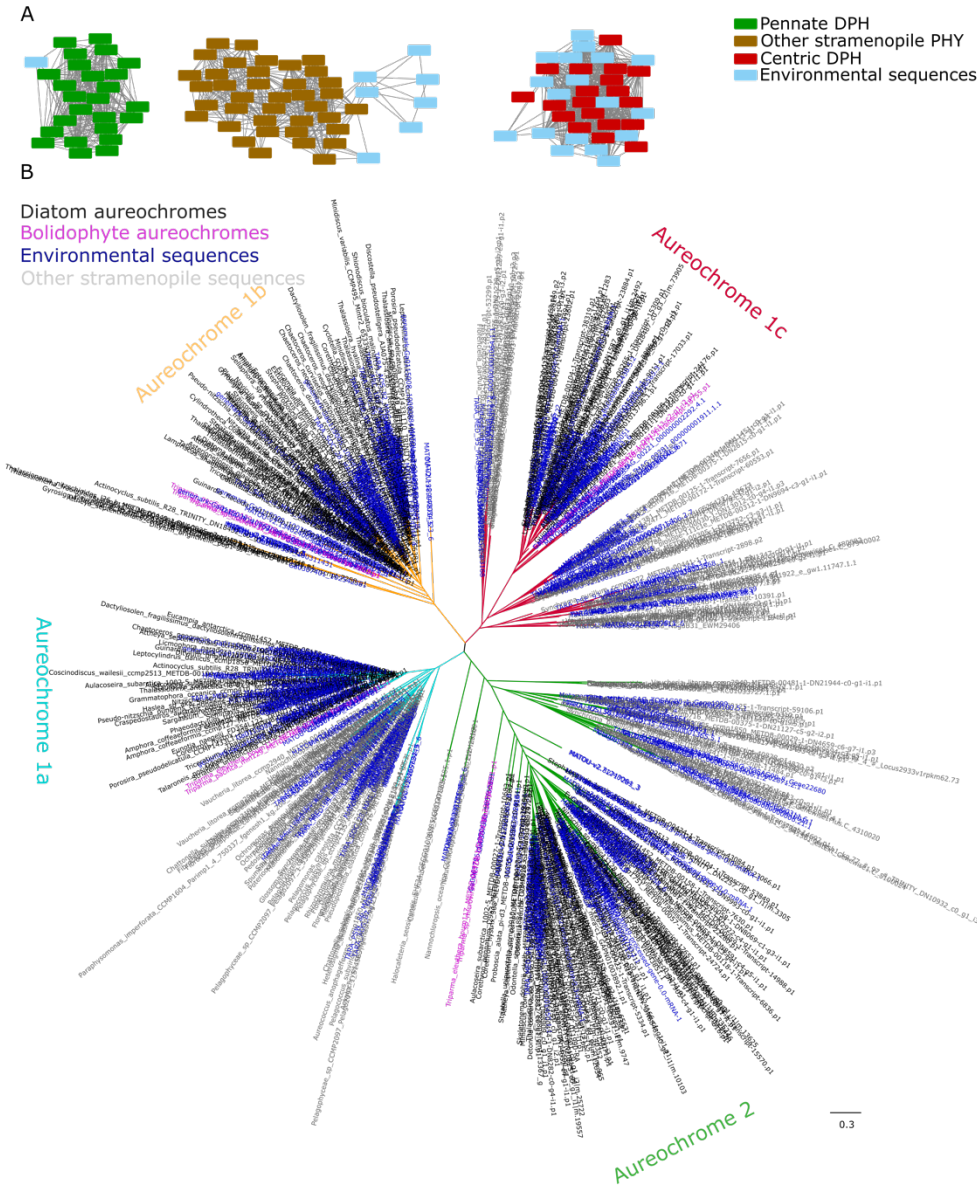

### Extended Data Fig.9

Method for DPH and diatom AUREO protein search. (A) Example of Sequence Similarity Network of the DPH REC domain, searched in *Tara* Oceans data showing separation of the different phytochromes (centric diatom, pennate diatom, other stramenopiles) for an alignment score threshold of 20. Environmental sequences grouping with the centric or pennate DPH will be annotated as such. (B) Phylogenetic tree of diatom AUREO search. Diatom clades are identifiable (black label), delimited by the Bolidophyceae aureochromes (sister picoplanktonic group of diatoms, purple labels). Branches are colored by the different aureochrome types: aureochrome 1a (cyan), 1b (orange), 1c (red) and 2 (green).

## Extended Data tables

### Extended Data Table 1.

Species from which DPH have been characterized in this study and previous one\* from (6) and information about their isolation site

| Species                            | Strain   | Sampling location, see also Data S1                                  |
|------------------------------------|----------|----------------------------------------------------------------------|
| <i>Phaeodactylum tricornutum</i> * | CCMP2561 | North Atlantic, off Blackpool, England                               |
| <i>Thalassiosira pseudonana</i> *  | CCMP1335 | North Atlantic, Moriches Bay, Forge River, Long Island, New York USA |
| <i>Cyclotella cryptica</i>         | CCMP332  | North Atlantic, Martha's Vineyard, Massachusetts USA                 |
| <i>Minidiscus spinulatus</i>       | RCC4659  | Atlantic Ocean, English Channel, Brittany coast                      |
| <i>Skeletonema costatum</i>        | RCC1617  | Atlantic Ocean, English Channel, Brittany coast                      |
| <i>Arcocellulus cornucervis</i>    | RCC2270  | Arctic Ocean, Beaufort Sea, at 0m depth                              |
| <i>Shionodiscus bioculatus</i>     | RCC1991  | Arctic Ocean, Beaufort Sea, at 65m depth                             |

### Extended Data Table 2.

Spectral and photochemical properties of different recombinant DPH

| Phytochrome     | max $\Delta A$ in B (nm) | min $\Delta A$ in B (nm) | max $\Delta A$ in R (nm) | min $\Delta A$ in FR (nm) | $\eta$ |
|-----------------|--------------------------|--------------------------|--------------------------|---------------------------|--------|
| <i>A.cor</i>    | 385                      | 424                      | 682                      | 767                       | 0.649  |
| <i>C.cry</i>    | 384                      | 424                      | 677                      | 768                       | 0.766  |
| Minidiscus-like | 385                      | 423                      | 682                      | 764                       | ND     |
| Acor-like       | 384                      | 424                      | 678                      | 768                       | 0.855  |
| <i>S.cos</i>    | 386                      | 424                      | 685                      | 767                       | ND     |
| <i>M.spi</i>    | 380                      | 424                      | 678                      | 760                       | 0.968  |
| <i>S.bio</i>    | 386                      | 424                      | 685                      | 746                       | ND     |
| <i>T.pse</i> *  | 384                      | 425                      | 683                      | 768                       | 0.678  |
| <i>P.tri</i> *  | 376                      | 419                      | 697                      | 749                       | 0.753  |

\*absorption spectra from Fortunato et al, 2016 (6). Max and min  $\Delta A$  : maximum and minimum of the differential absorption spectra in the blue (B), red (R), and far-red (FR) bands. ND: not determined.  $\eta$  were calculated with method from (27).

### Extended Data Table 3.

Estimation of the ratio of quantum yield from *in vivo* data

| Model   | Active form  | Saturating illuminations used in model                                         | Average of models fitted for each strain |            |                                 |
|---------|--------------|--------------------------------------------------------------------------------|------------------------------------------|------------|---------------------------------|
|         |              |                                                                                | Mean estimated ratio of quantum yield    | Std. Error | Average residual standard error |
| monomer | NA *         | only monochromatic                                                             | 1.256                                    | 0.271      | 0.07755                         |
| dimer   | PrPr actif   | only monochromatic                                                             | 0.704                                    | 0.132      | 0.07732                         |
| dimer   | PfrPfr actif | only monochromatic                                                             | 3.728                                    | 0.542      | 0.07680                         |
| dimer   | PrPr actif   | both mono- and bi-chromonatic                                                  | 0.959                                    | 0.082      | 0.10387                         |
| dimer   | PrPr actif   | Monochromonatic and visible bichromonatic illumination (ie excluding FR mixes) | 0.692                                    | 0.117      | 0.07875                         |

\*in a monomer model, the formula is exactly the same whether Pr or Pfr is the active from

### Extended Data Table 4.

SSN parameters for the DPH and diatom aureochrome search in *Tara* Oceans data

| Domain model       | SSN alignment score threshold |
|--------------------|-------------------------------|
| Centric GAF        | 30                            |
| Centric PHY        | 10                            |
| Centric HisKA      | 20                            |
| Centric HATPase    | 20                            |
| Centric REC        | 20                            |
| Pennate GAF        | 30                            |
| Pennate PHY        | 10                            |
| Pennate HisKA      | 20                            |
| Pennate HATPase    | 20                            |
| Pennate REC        | 20                            |
| Diatom Aureochrome | 70                            |

### Extended Data Table 5.

Sequences of primers used in this study

|                     |                                     |
|---------------------|-------------------------------------|
| qPCR-Phatr3_45662FW | CGAGGGAGCTCGGTTTATGG                |
| qPCR-Phatr3_45662RV | TGATGGGAAGTGTCTGCCC                 |
| qPCR-Phatr3_46431FW | GGTTTGCGAGTGCAATTTGGT               |
| qPCR-Phatr3_45662RV | TGTCAGCAACCTCATTCCCC                |
| qPCR-Phatr3_18180FW | CCGGGAACGTAGGTTTGAT                 |
| qPCR-Phatr3_18180RV | CCGCGGCCAACATAGCAAG                 |
| qPCR-H4FW           | AGGTCCTTCGCGACAATATC                |
| qPCR-H4RV           | ACGGAATCACGAATGACGTT                |
| <i>Hsf4.6ap_Fw0</i> | TCTAGAGAGCTCGGATTTTCAATCTGTTTTGGGCA |

|                        |                                                      |
|------------------------|------------------------------------------------------|
| <i>Hsf4.6ap-YFP_RV</i> | GATATCGGATCCTGTCAAAGGTTTAAAGAGAATCGGC                |
| <i>YFP-Hsf4.6ap_Fw</i> | AAACCTTTGACAGGATCCGATATCATGGTGAGCAAGGGCGAG           |
| <i>FcpAT_Rv0</i>       | TCTAGATGAAGACGAGCTAGTGTTATTCC                        |
| HO1xpET.HindIII.Fw     | GCAAGCTTAGAAGGAGATATACATATGAG                        |
| HO1xpET.NotI.Rv        | GCGCGGCCGCCTAGCCTTCGGAGGTGGCGAG                      |
| TpPHY.D.Fw             | AGGCTGTCTCGTCTCGTCTCAGGTCTCAAGGTATGAGTGTCAAAAAGAGCAC |
| TpPHY.SapI.Rv          | CAATGTGTTTCGCATGAACAGCTCTCTCGCTTG                    |
| TpPHY.SapI.Fw          | CAAGCGAGAGAGCTGTTTCATGCGAAACACATTG                   |
| TpPHY.BsaI.Rv          | CAAGCTGTTTATCAGGGTCACCACCCACGTGACAC                  |
| TpPHY.BsaI.Fw          | GTGTCACGTGGGGTGGTGACCCTGATAAACAGCTTG                 |
| TpPHY.Sap2.Rv          | GAGATCGAACAAGTGCTCCTCAATCTGAAGGTCGTATG               |
| TpPHY.Sap2.Fw          | CATACGACCTTCAGATTGAGGAGCACTTGTTTCGATCTC              |
| TpPHY.E.Rv             | TGGTAATCTATGTATCCTGTTGGTCTCTAAGCTCATCGTTCATTTTTGTGAT |
| PrPtPHY.A.Fw           | GGCTGTCTCGTCTCGTCTCAGGTCTCAGGAGCCCGGGGATATCGAAGATCC  |
| PrPtPHY.C.Rv           | TGGTAATCTATGTATCCTGGTGGTCTCGCATTTTTAAAGGCGTGGTTCCTTG |
| TrPtPHY.E.Fw           | TCGTCTCGTCTCAGGTCTCAGCTTCATGGTCGTTTCATTCATAGAAG      |
| TrPtPHY.F.Rv           | TGGTAATCTATGTATCCTGGTGGTCTCAAGCGCGCTCTTCCACCTCATCTC  |
| UNS1FL.FW              | CATTACTCGCATCCATTCTCAGGCTGTCTCGTCTCGTCTC             |
| UNSXFL.RV              | GGTGGAAGGGCTCGGAGTTGTGGTAATCTATGTATCCTGG             |
| SbioPHY.NheI.Fw        | GCGGCTAGCATGTCTGCCAGTTCACCAC                         |
| SbioPHY_PCD.SalI.Rv    | GCGGTCGACCTAAAGATTTTCCTTTTGATCTTG                    |
| AcorPHY.NheI.Fw        | GCGGCTAGCATGTCTGGCACCTGCGGCAGC                       |
| AcorPHY_PCD.SacI.Rv    | GCGGAGCTCCTAGTAGCTTGTGTGTTCTCGTC                     |
| MspiPHY.NheI.Fw        | GCGGCTAGCATGACCTCCTCCTCAACCAAC                       |
| MspiPHY_PCD.SacI.Rv    | GCGGAGCTCCTACTTCTGATCGGCAATCAATTC                    |
| ScosPHY.SpeI.Fw        | GCGACTAGTATGTCGTCCACCAATAGCAC                        |
| ScosPHY_PCD.SacI.Rv    | GCGGAGCTCCTAGAGGTTTTCTTTTGATCTTG                     |
| CcryPHY.NheI.Fw        | GCGGCTAGCATGGCAGCACCCCAAAAAC                         |
| CcryPHY_PCD.SacI.Rv    | GCGGAGCTCCTACTTCTGATCTTTAATCAAATC                    |
