# Supplementary material for: Diatom phytochromes integrate the entire visible light spectra for photosensing in marine environments
Source: Research Square preprint supplement (doi:10.21203/rs.3.rs-3167205/v1), 2023-07-24
Supplement: Supplementary file 1 [file 731ce568f4762ed76f6a555c.xlsx]

## Sheet: Sheet1
List of diatom genetic data used in this study (TSA: transcriptome; MetDB: https://metdb.sb-roscoff.fr/metdb/)
Group	Class	Order	Genus	Species	Strain	source	type	Additional reference	latitude	longitude	DPH copy number
Centric	Coscinodiscophyceae	Aulacoseirales	Aulacoseira	subarctica	1002-5	MetDB	TSA		54.6	-2.8	0
Pennate	Bacillariophyceae	Bacillariales	Cylindrotheca	closterium	KMMCC:B-181	MetDB	TSA		48.75	-3.95	0
Pennate	Bacillariophyceae	Bacillariales	Cylindrotheca	closterium	mira-c1	https://www.ncbi.nlm.nih.gov/Traces/wgs/GAPN01.1	TSA	Hook et la, 2014	-34.0809	151.223	0
Pennate	Bacillariophyceae	Bacillariales	Fragilariopsis	kerguelensis	L26-C5	MetDB	TSA		-48	-16	0
Pennate	Bacillariophyceae	Bacillariales	Fragilariopsis	kerguelensis	L2-C3	MetDB	TSA		-48.1	-24.25	0
Pennate	Bacillariophyceae	Bacillariales	Nitzschia	frigida		https://zenodo.org/record/3361258#.YKJRxXlxeUk	TSA	Kvernvik et al, 2020			0
Pennate	Bacillariophyceae	Bacillariales	Nitzschia	palea	CPCC-160	https://www.ncbi.nlm.nih.gov/Traces/wgs/GHBX01	TSA	Garaccii 2019	40.4993	-74.399	2
Pennate	Bacillariophyceae	Bacillariales	Nitzschia	punctata	CCMP561	MetDB	TSA		32.99	-117.25	2
Pennate	Bacillariophyceae	Bacillariales	Nitzschia	sp	Nitz4	NCBI Sequence Set browser	TSA	Onyshchenko et al, 2021	26.0813	-80.1108	0
Pennate	Bacillariophyceae	Bacillariales	Nitzschia	sp	ChengR-2013-ZJU	https://www.ncbi.nlm.nih.gov/Traces/wgs/GBCF01	TSA	Cheng 2013/2014			2
Pennate	Bacillariophyceae	Bacillariales	Nitzschia	sp	MBIC11128	MetDB	TSA		48.43	-3.59	0
Pennate	Bacillariophyceae	Bacillariales	Pseudo-nitzschia	fraudulenta	wwa7	MetDB	TSA		34.0847	-119.05	0
Pennate	Bacillariophyceae	Bacillariales	Pseudo-Nitzschia	arenysensis	B593	MetDB	TSA		40.8083	14.25	0
Pennate	Bacillariophyceae	Bacillariales	Pseudo-Nitzschia	australis	10249 10 AB	MetDB	TSA		36.6037	-121.889	0
Pennate	Bacillariophyceae	Bacillariales	Pseudo-Nitzschia	delicatissima	UNC1205	MetDB	TSA		48.816	-128.666	0
Pennate	Bacillariophyceae	Bacillariales	Pseudo-Nitzschia	delicatissima	B596	MetDB	TSA		40.8083	14.25	0
Pennate	Bacillariophyceae	Bacillariales	Pseudo-Nitzschia	heimii	UNC1101	MetDB	TSA				0
Pennate	Bacillariophyceae	Bacillariales	Pseudo-Nitzschia	multiseries	CLN-47	https://genome.jgi.doe.gov/portal/pages/dynamicOrganismDownload.jsf?organism=Psemu1, https://phycocosm.jgi.doe.gov/Psemu1/Psemu1.home.html	genome		45.75	-62.46	0
Pennate	Bacillariophyceae	Bacillariales	Pseudo-Nitzschia	multistriata	B856	https://www.ncbi.nlm.nih.gov/genome/?term=txid183589[orgn]	genome	Basu et al, 2017	40.8083	14.25	0
Pennate	Bacillariophyceae	Bacillariales	Pseudo-Nitzschia	pungens cf. cingulata	cf. cingulata	MetDB	TSA		47.6901	-122.4	0
Centric	Coscinodiscophyceae	Chaetocerotales	Attheya	septentrionalis	CCMP2084	MetDB	TSA		77.8136	-76.3697	0
Centric	Coscinodiscophyceae	Chaetocerotales	Chaetoceros	brevis	CCMP164	MetDB	TSA		-61.2833	-54.7361	0
Centric	Coscinodiscophyceae	Chaetocerotales	Chaetoceros	dichaeta	CCMP1751	MetDB	TSA		-49.9	11.55	0
Centric	Coscinodiscophyceae	Chaetocerotales	Chaetoceros	debilis	MM31A-1	MetDB	TSA		-49.6	2.1	0
Centric	Coscinodiscophyceae	Chaetocerotales	Chaetoceros	affinis	CCMP159	MetDB	TSA		29.42	-86.1	0
Centric	Coscinodiscophyceae	Chaetocerotales	Chaetoceros	neogracile	CCMP1317	MetDB	TSA		32.87	-118.3	0
Centric	Coscinodiscophyceae	Chaetocerotales	Chaetoceros	curvisetus	Chaetoceros curvisetus	MetDB	TSA		32.9	-117.255	0
Centric	Coscinodiscophyceae	Chaetocerotales	Chaetoceros	affinis	CCMP160	https://www.ncbi.nlm.nih.gov/Traces/wgs/GHAN01	TSA	Liang et al, 2019	43.3	5.4	0
Centric	Coscinodiscophyceae	Chaetocerotales	Chaetoceros	affinis	CCMP158	https://www.ncbi.nlm.nih.gov/Traces/wgs/GHAM01	TSA	Liang et al, 2019	44.57	-64	0
Centric	Coscinodiscophyceae	Chaetocerotales	Chaetoceros	sp	UNC1202	MetDB	TSA		48.816	-128.666	0
Centric	Coscinodiscophyceae	Chaetocerotales	Chaetoceros	neogracile	MALINA FT99.3 PG5	MetDB	TSA		70.6833	-138.367	0
Centric	Coscinodiscophyceae	Corethrales	Corethron	pennatum	L29A3	MetDB	TSA		-47.3333	-15.65	0
Centric	Coscinodiscophyceae	Corethrales	Corethron	hystrix	308	MetDB	TSA		58.5	0.32	0
Centric	Coscinodiscophyceae	Coscinodiscales	Coscinodiscus	wailesii	CCMP2513	MetDB	TSA		31.4322	-80.358	1
Centric	Coscinodiscophyceae	Coscinodiscales	Actinocyclus	subtilis	R28	https://zenodo.org/record/4161645#.YKJPnXlxeUk	TSA	Parks et al, 2018			0
Pennate	Bacillariophyceae	Cyclophorales	Cyclophora	radiata	13vi08-1A	MetDB	TSA		13.4427	144.643	0
Pennate	Bacillariophyceae	Cyclophorales	Cyclophora	tenuis	ECT3854	MetDB	TSA		21.514	-157.836	0
Centric	Mediophyceae	Cymatosirales	Minutocellus	polymorphus	CCMP3303	MetDB	TSA		-17.5	11.25	0
Centric	Mediophyceae	Cymatosirales	Extubocellulus	spinifer	CCMP396	MetDB	TSA		31.3172	-113.56	0
Centric	Mediophyceae	Cymatosirales	Minutocellus	polymorphus	NH13	MetDB	TSA		44.65	-124.41	0
Centric	Mediophyceae	Cymatosirales	Minutocellus	polymorphus	MALINA S95	MetDB	TSA		71.1833	-159.417	1
Pennate	Bacillariophyceae	Eunotiales	Eunotia	naegelii		https://zenodo.org/record/4161645#.YKJPnXlxeUk	TSA	Parks et al, 2018			0
Centric	Mediophyceae	Eupodiscales	Odontella	aurita	CCMP816	https://www.ncbi.nlm.nih.gov/Traces/wgs/GHBW01	TSA	Liang et al, 2021	28.8166	-89.3	1
Centric	Mediophyceae	Eupodiscales	Odontella	aurita	1302-5	MetDB	TSA		44.65	-124.53	0
Centric	Mediophyceae	Eupodiscales	Odontella	sinensis	1884	MetDB	TSA				0
Pennate	Bacillariophyceae	Fragilariales	Diatoma	tenuis		https://zenodo.org/record/4161645#.YKJPnXlxeUk	TSA	Parks et al, 2018	36.5089	-92.7382	1
Pennate	Bacillariophyceae	Fragilariales	Fragilaria	radians	A6 and BK280	https://www.ncbi.nlm.nih.gov/Traces/wgs/GGVJ01	TSA	Galachyants et al, 2019	51.8933	105.077	4
Pennate	Bacillariophyceae	Fragilariales	Fragilaria	radians	G9	http://www.lin.irk.ru/sacus/index.php?r=site/index&lang=en	genome	Galachyants et al, 2015	51.8933	105.077	4
Pennate	Bacillariophyceae	Fragilariales	Fragilaria	sp		https://zenodo.org/record/4161645#.YKJPnXlxeUk	TSA	Parks et al, 2018	36.613	-94.8403	2
Pennate	Bacillariophyceae	Fragilariales	Fragilariopsis	cylindrus	CCMP1102	https://phycocosm.jgi.doe.gov/Fracy1/Fracy1.home.html	genome	Mock et al, 2017	-64.08	-48.7033	0
Pennate	Bacillariophyceae	Fragilariales	Staurosira	complex	CCMP2646	MetDB	TSA		-36.5062	-73.1225	1
Pennate	Bacillariophyceae	Fragilariales	Synedra	sp	MALINA S93 P44.D11	MetDB	TSA		70.92	-128.92	1
Pennate	Bacillariophyceae	Fragilariales	Synedropsis	cf. recta	CCMP1620	MetDB	TSA		-77.8333	163	1
Pennate	Bacillariophyceae	Fragilariales	Asterionellopsis	glacialis	Asterionellopsis glacialis	MetDB	TSA		41.325	-70.5667	0
Pennate	Bacillariophyceae	Fragilariales	Asterionellopsis	glacialis	CCMP134	MetDB	TSA		32.655	-117.14	0
Pennate	Bacillariophyceae	Fragilariales	Asterionellopsis	glacialis	CCMP1581	MetDB	TSA		51.7333	3.7667	0
Centric	Mediophyceae	Hemiaulales	Eucampia	antarctica	CCMP1452	MetDB	TSA		-77.8333	163	0
Centric	Mediophyceae	Hemiaulales	Hemiaulus	sinensis	24i10-1A	NCBI Sequence Set browser	TSA	Kessenich et al, 2014			0
Centric	Coscinodiscophyceae	Leptocylindrales	Leptocylindrus	danicus	CCMP1856	MetDB	TSA		25	-90	0
Centric	Coscinodiscophyceae	Leptocylindrales	Leptocylindrus	danicus	var. apora B651	MetDB	TSA		40.8083	14.25	0
Centric	Coscinodiscophyceae	Leptocylindrales	Leptocylindrus	danicus	var. danicus B650	MetDB	TSA		40.8083	14.25	0
Centric	Coscinodiscophyceae	Leptocylindrales	Leptocylindrus	danicus	ECT3929	NCBI Sequence Set browser	TSA	Kessenich et al, 2014			0
Pennate	Bacillariophyceae	Licmophorales	Licmophora	paradoxa	CCMP2313	MetDB	TSA		42.4192	-70.9135	0
Centric	Mediophyceae	Lithodesmiales	Helicotheca	tamensis	CCMP826	MetDB	TSA		30	-60	0
Centric	Mediophyceae	Lithodesmiales	Ditylum	brightwellii	GSO104	MetDB	TSA		41.325	-70.57	0
Centric	Mediophyceae	Lithodesmiales	Ditylum	brightwellii	GSO105	MetDB	TSA		47.74	-122.417	0
Centric	Mediophyceae	Lithodesmiales	Ditylum	brightwellii	Pop1-SS4	MetDB	TSA		47.74	-122.417	0
Centric	Mediophyceae	Lithodesmiales	Ditylum	brightwellii	Pop2-SS10	MetDB	TSA		47.74	-122.417	0
Centric	Mediophyceae	Lithodesmiales	Ditylum	brightwellii	GSO103	MetDB	TSA		49.654	-127.436	0
Centric	Coscinodiscophyceae	Melosirales	Stephanopyxis	turris	CCMP815	MetDB	TSA		29.4666	-86.121	0
Pennate	Bacillariophyceae	Naviculales	Craspedostauros	australis	CCMP3328	MetDB	TSA		-38.45	145.333	0
Pennate	Bacillariophyceae	Naviculales	Amphiprora	paludosa	CCMP125	MetDB	TSA		41.525	-70.6736	0
Pennate	Bacillariophyceae	Naviculales	Amphiprora	sp	CCMP467	MetDB	TSA		32.87	-117.25	0
Pennate	Bacillariophyceae	Naviculales	Craticula	ambigua		https://zenodo.org/record/4161645#.YKJPnXlxeUk	TSA	Parks et al, 2018	35.5479	-92.3283	2
Pennate	Bacillariophyceae	Naviculales	Fistulifera	solaris	JPCC DA0580	https://www.ncbi.nlm.nih.gov/Traces/wgs/BDSP01	genome	Tanaka et al, 2015	28.25	129.4	0
Pennate	Bacillariophyceae	Naviculales	Gyrosigma	fasciola	ECR2AJA-02.R19	https://zenodo.org/record/4161645#.YKJPnXlxeUk	TSA	Parks et al, 2018			1
Pennate	Bacillariophyceae	Naviculales	Haslea	sp	Aka_5A P52.F2	MetDB	TSA		54.18	7.9	0
Pennate	Bacillariophyceae	Naviculales	Navicula	sp	RA120910 P2A1	MetDB	TSA		48.75	-3.95	2
Pennate	Bacillariophyceae	Naviculales	Phaeodactylum	tricornutum	CCMP2561	ftp://ftp.ensemblgenomes.org/pub/protists/release-46/fasta/phaeodactylum_tricornutum ou Genbank	genome	Bowler et al, 2008	54	-4	1
Pennate	Bacillariophyceae	Naviculales	Pleurosigma	sp	RA120910 P1B3	MetDB	TSA		48.75	-3.95	0
Pennate	Bacillariophyceae	Naviculales	Sellaphora	sp		https://zenodo.org/record/4161645#.YKJPnXlxeUk	TSA	Parks et al, 2018	34.6157	-93.4129	0
Pennate	Bacillariophyceae	Naviculales	Seminavis	robusta	D6	https://bioinformatics.psb.ugent.be/orcae/overview/Semro	genome	Osuna-Cruz et al. 2020	51.229	2.94603	4
Pennate	Bacillariophyceae	Naviculales	Stauroneis	constricta	CCMP1120	MetDB	TSA		-0.7475	-126.03	0
Pennate	Bacillariophyceae	Rhabdonematales	Grammatophora	oceanica	CCMP410	MetDB	TSA		37.86	144.93	0
Centric	Coscinodiscophyceae	Rhizosoleniales	Guinardia	flaccida	RA120910 P1E1	MetDB	TSA		48.75	-3.75	0
Centric	Coscinodiscophyceae	Rhizosoleniales	Proboscia	alata	PI-D3	MetDB	TSA		-64.0038	-0.0025	0
Centric	Coscinodiscophyceae	Rhizosoleniales	Proboscia	inermis	1064-1	MetDB	TSA		-63.25	-58.33	0
Centric	Coscinodiscophyceae	Rhizosoleniales	Rhizosolenia	setigera	CCMP1694	MetDB	TSA		23.5643	58.853	0
Centric	Coscinodiscophyceae	Rhizosoleniales	Dactyliosolen	fragilissimus	Dactyliosolen fragilissimus	MetDB	TSA		41.325	-70.5667	0
Centric	Coscinodiscophyceae	Stephanodiscales	Cyclotella	meneghiniana	CCMP338	MetDB	TSA		43.8442	-69.641	0
Centric	Coscinodiscophyceae	Stephanodiscales	Cyclotella	cryptica	CCMP332	https://gsajournals.figshare.com/articles/Supplemental_Material_for_Roberts_et_al_2020/12341072	genome	Roberts et al, 2020	41.355	-70.655	1
Centric	Coscinodiscophyceae	Stephanodiscales	Discostella	pseudostelligera		https://zenodo.org/record/4161645#.YKJPnXlxeUk	TSA	Parks et al, 2018			0
Pennate	Bacillariophyceae	Striatellales	Striatella	unipunctata	CCMP2910	MetDB	TSA		56.42	-5.52	0
Pennate	Bacillariophyceae	Thalassionemales	Thalassionema	frauenfeldii	CCMP1798	MetDB	TSA		18.47	64.575	0
Pennate	Bacillariophyceae	Thalassionemales	Thalassionema	nitzschioides	L26_B	MetDB	TSA		-47.8667	-15.8	0
Pennate	Bacillariophyceae	Thalassionemales	Thalassionema	nitzschioides	Unkown	MetDB	TSA		41.325	-70.5667	0
Pennate	Bacillariophyceae	Thalassionemales	Thalassiothrix	antarctica	L6-D1	MetDB	TSA		-51.8333	-28.6667	0
Pennate	Bacillariophyceae	Thalassiophysales	Amphora	coffeaeformis	CCMP127	MetDB	TSA		41.525	-70.6736	4
Centric	Coscinodiscophyceae	Thalassiosirales	Minidiscus	sp	RCC4582	https://zenodo.org/record/4596789#.YKJQVnlxeUk	TSA	Guajardo 2021 (unpublished?)	-62.2	-58.92	0
Centric	Coscinodiscophyceae	Thalassiosirales	Minidiscus	sp	RCC4584	https://zenodo.org/record/4596789#.YKJQVnlxeUk	TSA	Guajardo 2021 (unpublished?)	-62.2	-58.92	0
Centric	Coscinodiscophyceae	Thalassiosirales	Minidiscus	sp	RCC4590	https://zenodo.org/record/4596789#.YKJQVnlxeUk	TSA	Guajardo 2021 (unpublished?)	-62.2	-58.92	0
Centric	Coscinodiscophyceae	Thalassiosirales	Thalassiosira	minima	RCC4583	https://zenodo.org/record/4596789#.YKJQVnlxeUk	TSA	Guajardo 2021 (unpublished?)	-62.2	-58.92	0
Centric	Coscinodiscophyceae	Thalassiosirales	Thalassiosira	minima	RCC4593	https://zenodo.org/record/4596789#.YKJQVnlxeUk	TSA	Guajardo 2021 (unpublished?)	-62.2	-58.92	0
Centric	Coscinodiscophyceae	Thalassiosirales	Thalassiosira	sp	RCC4219	https://zenodo.org/record/4596789#.YKJQVnlxeUk	TSA	Guajardo 2021 (unpublished?)	-62.2	-58.92	0
Centric	Coscinodiscophyceae	Thalassiosirales	Thalassiosira	sp	RCC4606	https://zenodo.org/record/4596789#.YKJQVnlxeUk	TSA	Guajardo 2021 (unpublished?)	-62.2	-58.92	0
Centric	Coscinodiscophyceae	Thalassiosirales	Thalassiosira	miniscula	CCMP1093	MetDB	TSA		32.87	-117.25	1
Centric	Coscinodiscophyceae	Thalassiosirales	Thalassiosira	oceanica	CCMP1005	ftp://ftp.ensemblgenomes.org/pub/protists/release-46/fasta/protists_stramenopiles1_collection/thalassiosira_oceanica_gca_000296195/pep/	genome	Lommer et al, 2012	33.1833	-65.25	0
Centric	Coscinodiscophyceae	Thalassiosirales	Thalassiosira	oceanica	CCMP1005	MetDB	TSA		33.1833	-65.25	0
Centric	Coscinodiscophyceae	Thalassiosirales	Skeletonema	japonicum	CCMP2506	MetDB	TSA		34.3	132.4	1
Centric	Coscinodiscophyceae	Thalassiosirales	Thalassiosira	delicatula	UNC1417	Marchetti Data	TSA		35.9345	-121.734	1
Centric	Coscinodiscophyceae	Thalassiosirales	Thalassiosira	weissflogii	CCMP1010	MetDB	TSA		37	-65	1
Centric	Coscinodiscophyceae	Thalassiosirales	Thalassiosira	pseudonana	CCMP1335	https://genome.jgi.doe.gov/portal/pages/dynamicOrganismDownload.jsf?organism=Thaps3	genome	Armbrust et al, 2004	40.756	-72.82	1
Centric	Coscinodiscophyceae	Thalassiosirales	Thalassiosira	weissflogii	CCMP1336	MetDB	TSA		41.11	-72.1	1
Centric	Coscinodiscophyceae	Thalassiosirales	Skeletonema	grethea	CCMP1804	MetDB	TSA		41.4331	-71.455	0
Centric	Coscinodiscophyceae	Thalassiosirales	Skeletonema	menzelii	CCMP793	MetDB	TSA		41.566	-70.5842	1
Centric	Coscinodiscophyceae	Thalassiosirales	Skeletonema	dohrnii	SkelB	MetDB	TSA		41.5736	-71.4086	1
Centric	Coscinodiscophyceae	Thalassiosirales	Skeletonema	marinoi	skelA	MetDB	TSA		41.5736	-71.4086	1
Centric	Coscinodiscophyceae	Thalassiosirales	Skeletonema	marinoi	skelA	MetDB	TSA		41.5736	-71.4086	1
Centric	Coscinodiscophyceae	Thalassiosirales	Detonula	confervacea	CCMP353	MetDB	TSA		41.6	-71.4	0
Centric	Coscinodiscophyceae	Thalassiosirales	Thalassiosira	gravida	GMp14c1	MetDB	TSA		41.9273	-67.8579	0
Centric	Coscinodiscophyceae	Thalassiosirales	Skeletonema	marinoi	FE60	MetDB	TSA		43.5	14.5	1
Centric	Coscinodiscophyceae	Thalassiosirales	Skeletonema	marinoi	FE7	MetDB	TSA		43.5	14.5	1
Centric	Coscinodiscophyceae	Thalassiosirales	Thalassiosira	sp	NH16	MetDB	TSA		44.65	-124.53	1
Centric	Coscinodiscophyceae	Thalassiosirales	Thalassiosira	punctigera	C2	MetDB	TSA		47.6901	-122.4	1
Centric	Coscinodiscophyceae	Thalassiosirales	Skeletonema	costatum	RA080513-05	MetDB	TSA		48.45	-3.57	1
Centric	Coscinodiscophyceae	Thalassiosirales	Thalassiosira	rotula	CCMP3362	https://www.ncbi.nlm.nih.gov/Traces/wgs/GGLQ01	TSA		48.6293	-122.957	1
Centric	Coscinodiscophyceae	Thalassiosirales	Thalassiosira	rotula	GSO102	MetDB	TSA		48.6294	-122.958	1
Centric	Coscinodiscophyceae	Thalassiosirales	Minidiscus	comicus	RCC4660	https://zenodo.org/record/4596789#.YKJQVnlxeUk	TSA	Guajardo 2021 (unpublished?)	48.75	-3.95	1
Centric	Coscinodiscophyceae	Thalassiosirales	Minidiscus	sp	RA080513-10	MetDB	TSA		48.75	-3.95	1
Centric	Coscinodiscophyceae	Thalassiosirales	Minidiscus	spinulatus	RCC4659	https://zenodo.org/record/4596789#.YKJQVnlxeUk	TSA	Guajardo 2021 (unpublished?)	48.75	-3.95	1
Centric	Coscinodiscophyceae	Thalassiosirales	Minidiscus	variabilis	RCC4665	https://zenodo.org/record/4596789#.YKJQVnlxeUk	TSA	Guajardo 2021 (unpublished?)	48.75	-3.95	1
Centric	Coscinodiscophyceae	Thalassiosirales	Skeletonema	marinoi	UNC1201	MetDB	TSA		48.816	-128.666	1
Centric	Coscinodiscophyceae	Thalassiosirales	Thalassiosira	rotula	CCMP3096	MetDB	TSA		49.65	-127.434	1
Centric	Coscinodiscophyceae	Thalassiosirales	Thalassiosira	rotula	CCMP3096	https://www.ncbi.nlm.nih.gov/Traces/wgs/GCVF01	TSA	Alexander et al, 2015	49.65	-127.434	1
Centric	Coscinodiscophyceae	Thalassiosirales	Skeletonema	marinoi	SM1012Den-03	MetDB	TSA		55.5837	12.412	1
Centric	Coscinodiscophyceae	Thalassiosirales	Thalassiosira	antarctica	CCMP982	MetDB	TSA		59.5	10.6	1
Centric	Coscinodiscophyceae	Thalassiosirales	Skeletonema	marinoi	SM1012Hels-07	MetDB	TSA		59.51	23.15	1
Centric	Coscinodiscophyceae	Thalassiosirales	Shionodiscus	bioculatus	MALINA FT99.3 PG3bis	MetDB	TSA		70.68	-139.63	1
Centric	Coscinodiscophyceae	Thalassiosirales	Porosia	pseudodelicatula	CCMP1433	https://zenodo.org/record/4161645#.YKJPnXlxeUk	TSA	Parks et al, 2018			0
Centric	Coscinodiscophyceae	Thalassiosirales	Thalassiosira	hyalina		https://zenodo.org/record/3361258#.YKJRxXlxeUk	TSA	Kvernvik et al, 2020			0
Centric	Coscinodiscophyceae	Thalassiosirales	Thalassiosira	rotula	unknownstrain		TSA				1
Centric	Mediophyceae	Triceratiales	Talaroneis	posidonae	CCMP2565.L107	https://zenodo.org/record/4161645#.YKJPnXlxeUk	TSA	Parks et al, 2018	40.7333	13.85	0
Centric	Mediophyceae	Triceratiales	Lampriscus	shabdoltianus	ECT2AJA-054.R71	https://zenodo.org/record/4161645#.YKJPnXlxeUk	TSA	Parks et al, 2018			0
Centric	Mediophyceae	Triceratiales	Triceratium	dubium	CCMP147	MetDB	TSA		30	-60	0
Pennate	Bacillariophyceae		Entomoneis	sp	CCMP2396	MetDB	TSA		77.8333	-75.55	0
											67

## Sheet: Sheet2
DPH sequences used to build the hmm models
Centric diatoms
Gene	Sequence
Minutocellus_polymorphus_malinas95_METDB-00264-1-Transcript-1012.p1	GASSSSSSNDYSKQNVPLQCEREPIHIVNRIQPCGTLLVVDSELRVVQCSANAFDLLPADFAWEESGIDSSNDDDGTSQSTSKAKAMGYDPRLDAIIGRDLGLLLQPEAVEQIGSLVSSAGAQESHGESSSGHAHRGSAGSSMDDLRSSVLSHISHQDPLSSLTGALGAAHLGTTGGASGGKTGTAATAGGGGATLGGGKGGAEAARNFLIRSKATGHLSLASKSCSVTQSGEFFLLEIEDLSAEHGSSANANGTAAGGAADEETTKTEIADLGDRDVMLFMEGIARELRRCWSIEEMASLVCSRIMTETPYDRGMVYRFDPGDDSGEIIYESFRQDARTDCRKDSFLGLRFPASDIPRQARELFMRNTLRYVYDVNGKDWPLYPSRVTGSKVVGGEHY…
Skeletonema_costatum_ra080513-05_METDB-00409-1-Transcript-25379.p1	MSSTNSTNEDYARQVTPLSCEREPIHIVNRIQPCGTLLVVDSELTIVQCSTNAVDLLPEGLEAQKNKATNEQLQLLDSIIGAPLSLLLQADAVDKVRAVVRGASASSASMSPSKNTSNSGSNGTGGTDNNGSKGSTNAGAVRTFLIRTQGALSIHGRKSCGITQSGEHFLLEIENSDLDNTHTNDVINDVGSTTTTGSVDTNNTSAQQQQQREEADTAEGEEDTMLFMQSIAHDLRKCWSIEEMAGLVCSRIMSETPYDRGMVYRFDASDDSGEVIYETTRWDARRCCRDDSFLGLRFPASDIPRQARELFMKNTLRFVYDVQGTDHALYPRKIRANNMGGESEKYTDLSMCRLRGSSYIHLDYLRNMKVTSSLVIAIIVNKRLWGLYSFHGYRHPIRP…
Skeletonema_dohrnii_skelb_METDB-00410-1-DN11723-c0-g2-i3.p1	DRSIMSSTNVTNEDYARQVTPLSCEREPIHIVNRIQPCGTLLVVDSELTIVQCSTNAVDLLPEGFKALTNKNDGATTNEQQQLQLLDSIIGAPLSLLLQSDAVDKVRAVVRGASASSASMSPSKITSNSGSNNGTGGTDDNGNKSNTNAGAVRTFLIRTQGALSIHGRKSCGITQSGEHFLLEIEDSDLDNTHNNEVGSTTTTGSVDTTNTSAQQQQQQQREEADTAEGEEDTMLFMQSIAHDLRKCWSIEEMAGLVCSRIMSETPYDRGMVYRFDASDDSGEVIYETTRWDARRCCRDDSFLGLRFPASDIPRQARELFMKNTLRFVYDVQGTDHALYPRKIRANSMGGESEKYTDLSMCRLRGSSYIHLDYLRNMKVTSSLVIAIIVNKRLWGLYSF…
Skeletonema_japonicum_ccmp2506_METDB-00412-1-Transcript-15431.p1	KVQAVVRGASVSSASMSPSRKKRSSNLNKSNSDTNSMGSNDNDGSKSNNTNAGAVRTFLIRTQGALSIHGRKSCGITQSGEHFLLEIEDIDLDYNSRKKTGSTNTTTTTAAATSNVNKDVNEDSDQQQQQEEAGTVEGEEDTMLFMQSIAHDLRKCWSIEEMAGLVCSRIMSETPYDRGMVYRFDASDDSGEVIYETTRWDARRCCRDDSFLGLRFPASDIPRQARELFMKNTLRFVYNVQGKDHALYPSKIAHNVGGEADKYTDLSMCRLRGSSYIHLDYLRNMKVTSSLVIAIIVNKRLWGLYSFHGYRHPIRPSARTRFLCEMASVMTSMVMESLTRANNQSRLLDIDQTLSNLQQLNLVQYMSNSTHRKLLMERMDVNLIAFRQTDSNGDAHIHT…
Skeletonema_marinoi_R05AC_GGYN01002607.1.p1	MSSTNSTNEDYARQVTPLSCEREPIHIVNRIQPCGTLLVVDSELTIVQCSTNAVDLLPEGFKAPTNEVTNEQQQLQLLDAIIGAPLSLLLQSDAVDKVRAVVRGASASSASMSPSKNTSNSGSNGTGGTDNNGSKSSTNAGAVRTFLIRTQGALSIHGRKSCGITQSGEHFLLEIEDSDLDNTHNNEVDEVGSTTTTGSVDSTNNTSAQQQQQQREEADTAEGEEDTMLFMQSIAHDLRKCWSIEEMAGLVCSRIMSETPYDRGMVYRFDASDDSGEVIYETTRWDARRCCRDDSFLGLRFPASDIPRQARELFMKNTLRFVYDVQGTDHALYPRKIRANNMGGESEKYTDLSMCRLRGSSYIHLDYLRNMKVTSSLVIAIIVNKRLWGLYSFHGYRHP…
Skeletonema_menzelii_ccmp793_METDB-00419-1-DN7336-c5-g1-i1.p1	MLSSTDEDYARQVTPLSCEREPIHIVNRIQPCGTLLVVDSELTIVQCSTNAVDMLSEGVVQTLLQQENDGTTSMNDVNNDDDDNSGSTAAAKEKRAKLQQLRLLDGIIGSPLSTLLPSDAVDKVRAVVRGSSSVSSAAASDNMPFTPNKNGSSNSDTSSNNDSSSEGRSNTNAGAVRTFLIRTQGALSIHGRKSCGITQSGQHFLLEIEDCDLDNNATATDVTEDSSAQQQQQQQQKEEADTAEGEEDTMLFMQSIAHDLRKCWSIEEMAGLVCSRIMSETPYDRGMVYRFDASDDSGEVIYETTRWDARRCCRDDSFLGLRFPASDIPRQARELFMKNTLRFVYDVQGTDYALYPSKIRATNMGGESETYTDLSMCRLRGSSYIHLEYLKNMKVTSSL…
Thalassiosira_antarctica_ccmp982_METDB-00451-1-DN9267-c0-g1-i1.p1	SNIMAPKRRRSSVGRPFFKNKTLDGENFAPQITPLSCEREPIHIVNRIQPCGTLLVINSDLVIVQCSTNALELLPEDYELEETTDDLAALTLIAGENDFDPRLAVSKLPNVEDDNAADRERRLSLLNAIIGSPLSLLLQSKAVDQVLSVVRGATATSSAKDDTKGDETKDTEPTNGCGANTNTGAVRTFLIRTRRLVSTGRKSCSITQSGQHFLIEIEDMDEDPKPNLSSVSTANDGANDIEGDQVNEGDAEGEGDAMVFMQSIAHDLRKCWSIEEMAGLVCSRIMSETPFDRGMVYRFDPSDGSGEVVYETTRWDARRCCRDDSFLGLRFPATDIPRQTRELFMKNTLRFVYNVLGKDHALYPSRIEGEMGEAKKYTDLSMCRLRGSSHMHLEYLRNM…
Thalassiosira_sp_fw_METDB-00458-1-Transcript-7738.p1	RGIHTLVFFRTSGVDVILSRNRTIERVTWGGDPDKQLEPDGTLTPRNSFAAYVEDHFKKGKPWDATDRQLISRFSDQLEKHRTKELNLEHSKTIKTLEKEKAEATETARVNFDFFAHMAHELRTPFHGMVGSLEAMREDPVLRNNEMLKTAELCGKSMIKILDDILLVAKGSYDLQIEEHLFDLKSFVKITANDMSSFALMEGAPIQLGKELIFCKDLVGDSQRIRQVMNNLLSNAIKFSEDSISLDVVQKNSFSEVLAVWKTYSNVYPNCEPTLLELSTFVAEASEA
Thalassiosira_miniscula_ccmp1093_METDB-00453-1-DN13919-c4-g6-i1.p1	MANTNSSDNNFNVEGNTTTPDYARQVTPLSCEREPIHIVNRIQPCGTLLVIDADLIIVQCSTNAVSMLLLPRDCNEKEKKGEIDNDEDENHGRKEDAENAKDLLDTIIGSHLSLLLQNDAVEKVRAVVRGATSSVSKSQAFKSNRNQSGSSSGGGGANSNSNNPSDTSPSSSSTILRSPPPIPSNTNNGAVRNFLVRTQGSSSLASASSERRESCCVTQSGEHFLLEIEDPDNDDDDRRGDRGQQQQSQPLRNQGEPQDNKEQSKEKDSSSPPPPPPSSKTATGVGEEDTMIFMQSIAHELRKCWSIEEMAGLVCSRIMSETPYDRGMVYRFDPSDHSGEVVYETTRWDARKCCREDSFLGLRFPASDIPRQARELFMRNTLRFVYDVEGVDYALYPAK…
Thalassiosira_sp_nh16_METDB-00459-1-Transcript-293.p1	EEEGSGDAEGEEDTMIFMQSIAHELRKCWSIEEMAGLVCSRIMSETPYDRGMVYRFDPCDDSGEVIYETTRWDARRCCREDSFLGLRFPASDIPRQARELFMKNTLRFVYDAQGKDYALYPNKIRSMGMGEGSKYTDLSMCRLRGSSHMHLEYLQNMKVTSTLVIAIIVNKRLWGLYSFHGYRHPIRPSARTRFLCEMASVMTSMVMESLMRTNDQSRLMDIDETMSALKEISLTDLLVTPPNSKKLFELLEVDLISFRKKNGNGTSQIYTGGDQLTRVTPEAFQSLEDTYGQVCKDYGVVFVNETTTNPALGSLHTIAFFQFPGVEGLDVLLSRKAVVEMVEWGGDPEKTLQDDGTLSPRSSFANFVKGHLKKGKPWDDADKERVRRFLERLEKYRST…
Thalassiosira_pseudonana_CCMP1335_Thaps3_22848	MSVKKSTSPSEKRDVPTECEKEPIHIINRIQPCGYLVNVDRNLNIVQCSANAVELLPPEQVKIIFSHWKSKQECINEDEQDDFDFDSTEGKDFFKFANDKNQNREDAKKRKAALDFMIGKPLGLIFGAEHVSQVKDVIENVIMTSGGGGGSASSSGERHSLPSFIQPPSKRRVSDDNFLLRSESTLSLSGRISCSVLPSSQNFLLELEKTPLLEKYTQFEDRDVMSFMEEIAKELRACWSIEEMASLVCAKVMQETPYDRGMVYKFDHEDCGEVVYEAFRSDASEACRKDSFLGLRFPASDIPRQARELFMRNTLRVVYDVDGNDFELYPPMVDIKRASGEKELGYTDLSMCRLRGSSFVHLKYLKNMGVTSTMVIAIIVNGRLWGLYSFHGYREPLVP…
Thalassiosira_rotula_CCMP3096_GCVF01018930.1.p1type:5prime_partial len:1032 (+),score=226.73 gb|GCVF01018930.1|	PNIHNDVNNDNSDSNNNLENNLSNIALEEEDNAKLKARLDSIIGSPLSLLFQSEAVDQVKAVVRGTAKSNNSGTNAATTTNTSTNTGAVRTFLVRTQGSLSVSSGRKSCGVTQSGEHFLLEIEDRENSSVEEDERKQQQQQRTSMETTSATTNNNTNDDDDGEEDTMLFMQSIAHELRKCWSIEEMAGLVCSRIMSETPYDRGMVYRFDQCDDSGEVIYETTRWDARRCCREDSFLGLRFPASDIPRQARELFMRNTLRFVYDVRGEDYPLYPSKVRKVGDVGGGGGGEDDAKYTDLSMCRLRGSSYMHLEYLRNMKVTSTLVIAIIVNKHLWGLYSFHGYRHPIRPSARTRFLCEMASVMTSMVMESLTRTNDQSRLMDIDETLSNLKELSLIDYMNN…
Thalassiosira_weissflogii_ccmp1336_METDB-00460-1-DN8652-c2-g2-i1.p1	MATIEPKTSPPRSAHYEDPTRQVPTECEKEPIHIINRIQPCGYLITVNRDLSIVQCSANVVELLPKKLILELGIADLLHPNHHHDDGGVAFENKQEEAKKRRRAALNSVIGKHLGVIFSDDHVEQVKDVIEGVLCGQYGQKTTGRIGSLETLTSSLDVNARRLSDDRRSSGASRDGSVSYSDGGADSPPLLSASDGTRNFIDRSKGTVEFSGRLSCSILPTSTPTTRESSQIFILELEKIPLLQNYAKFEDRDIMSFVEEIARELRKCWSIEEMASLVCSRVMAETPYDRGMVYKFDHEDCGEVVFESFRPDSRIECRKDSYLGLRFPASDIPRQARELFMKNTLRYVYDVSGKDFELHPPMVDAAKGTSGGGSYGGDTAGMGYTDLSMCRLRGSSYVH…
Cyclotella_cryptica_CCMP332_CCRYP_002530-RA	MAAPHKTIHDSADYAVQVTPLSCAREPIHIVNRIQPCGTLLVVDADLRIVQCSTNAVEFLPADFDVAGLRGDDAASEEKLVQLLDAIIGSPLSLLLQADAVDKVRAVVLGAPGVPDVMGDTGDPASAMSSPGEVQAAALIGTNTNSGAVRTFLVRTQGSLSLGRRSCMVTQSGEHFLLEIEEQEQPHEDREKASPEDQEDTMLFMQSIAHELRKCWSIEEMAALVCSRIMTETPYDRGMVYRFDPADDSGEVIYETTRWDARQCCRDDSFLGLRFPASDIPRQARELFMKNTLRFVYDVDGKDYPLYPSKIKIDVLDGEEKYTDLSMCRLRGSSYIHLEYLRNMKVTSSLVIAIIVNKRLWGLYSFHGYRHPIRPSAKTRFLCEMSSVMTSIVMESLTR…
Minidiscus_spinulatus_RCC4659_TRINITY_DN8893_c5_g4_i1.p1	MTSSSTNNNEDKSSSSMNDKDFADLTPTLTCEREPIHIVNRIQPCGTLLVVDSNLIIVQCSTNAVELLPGDYDDDGTTSAGGADDNIENCKEEKVDDLDPRLFVSKVKNNNNINHKLLNQIIGSPLSVVLQSDAVDQVRGVILGATTQPAVHTKASDDKTTHGAVRTFLIRTRRVLSNTGRKSCGVTQSGQHFLIEIEDVDDVVNKEEGKGGNTTATDGGGGGSDHNNNNQDAKGESDAMVFMQSIAHDLRKCWSIEEMAGLVCSRIMSETPYDRGMVYRFDESDGSGEVIYETTRWDARRCCRDDSFLGLRFPASDIPRMARELFMKNTLRFVYDVQGSDHPLYPSRINSSISGDGGERKYTDLSMCRLRGSSHVHLEYLRNMKVTSSLVIAIIVNKK…
Shionodiscus_bioculatus_malinaft99.3pg3bis_METDB-00408-1-DN20161-c2-g6-i1.p1	MCRLRGSSYIHLEYLKNMQVTSTLAIAIIVNKRLWGLYSFHGYRQPIRPSAKTRFLCDMSSVMTSMVMESLTRTNDQSRLLAIDETLSNLKDLSLFDLMNNPTHSKQLFETLDVGLISFRKIDNEGNSHIYNYSEDGQLVEVSPEAFQSLQDTYGQVCKDYGVVFVNETTSNPALGSLHTLAFFQFPGVSGLDVLLSRKAIVELVEWGGDPLKTIQSDGTLSPRSSFTSFIKGHLKKGKPWDDADKIRVKRFVERLEKYRSSEVFEKQHNTIVNLGQERSDLIKDQKENLDFFAFMAHELRTPFHGVLGSLEAMREDPTLANNQLLNNAYMCGKNMVRILDDILLVAKGSFSLNIKDEVVDASEWLRDTVSGMRNFALMEGVSVRVSKEDIHIAPTLVS…
Pennate diatoms
Fragilaria_radians_A6andBK280_MOB11319.1	MLTSHHRFSKMIRCFCVGMYLDPRQKTFIIRDSEGATSMTIISDEELNECDREPVHLIGHIQGNCGNCIFVNFPKWEILAVDANIIELTFISTTVPNTTLRSNATMAAEDLVGIHLQDFFPPDLFAELEAKVQMLIHSNSKKSYLFYQFEGSGFAVSTSSCAPDFSVVAFEIEKLNSEVETSTLFQTYSSMSLLMHDYTDEKKIVQNACDRVFYLIGKYDRGMVYRFNDDYSGEVIHEIKKEHMKTSYLGLRFPSSDIPKSSRLLYLINRVRYIYNTERDPVKIIARDNIPIDQSLCQMRAVAKPHIIYLKQMGVISSMSIALIVDNELWGLFSFHSYQEPYKPSLQQRLACESIGAMASIRIEASLKKVESSRSILLGQQVTQLDKKKCVIQNISEWG…
Fragilaria_radians_A6andBK280_MOB16096.1	MGCLSLLCESLNNELNPDSMDLLHTALASGNHMLNLLNDILKISKSNHLSHDVLRENLSFQKMAVQLVNTMKPFAMTRGITITSNISPGNSDCTIVVDNTKVTQIVSNCVNNAIKFAPYGSTIDMQITLSYSICDSMCKWRKKALLHAGHVFFPYDGNMLYDGNTIDSWLKREASDPKDLWLMILISDSGCGMKSVELSAMFAPYSQSSCGSNRNFQGTGLGLYICVSLCHLLHGFIACASTPNKGTTFAIGIPVKQEEPHNGSETPNLDEKEEIENMHPIPMTGGILIVDDNKVNVKILKRNIEVECKKSGKSFEIFCAFGGEEAVELYKIHQPSMCFIDYHMPDVDGILATKQIRAFEAEQQLPPSYIMSYTADATLAARDVVLASGANDIMTKPPP…
Fragilaria_radians_A6andBK280_MOB21158.1	MEDGNRNEDLTECDREAIHLIGHIQGECGNCLFVNFPGWEIIAADVTIMKLKIMSTAIDNGKMASGWIHPNDFIGLSLKDIIPNELYSQLQEKAQKLVTSRSSKAYLFYKHQGSAFAISVSSSAPDMSILCFEFEELNTDGEASALLQAYTSMSMLMDNFSEENVIANACDRVFDLIGRYDRGMVYRFNDDYSGEVIHEIKRDHINSSYLGLRFPSSDIPKSSRLLYFVNRVRYIHNNLIDPIEIIAKENIPIDQSLCQMRAVAKPHVIYLKQMGVVGSMSMAIVVDDELWGLFSFHAYTEPYKPSLQQRLACESIATVVSVRVEASLKKTESSRSILLGQQISQLDKKKCVIKNISEWGTSLLGIIKADVFVSYVENRKGEEQEITILGNSDLKPTEG…
Fragilaria_radians_A6andBK280_MOB15451.1	MSSLMESYAGDNIVENACDRIFELFGRYDRGMVYRFNDDDSGEVIHEIKHDHIDTSYLGLRFPSSDIPKPARRLYFINRVRYIHNNELEPIQIIARDNITIDQSLCHMRAVAKPHVVYLKQMGVVSSMSMAIIVDDELWGLLSFHAYTHAYKPSLQQRLACESIGAMVSVRVESAMKKIESSRSLLLGQQVSQLDKKKCVNQNMSDWGNALLSIIKADVFVGYTENPKGGELEYLVLGNSVLKPGKGIWKKLGQLRSRELVVSSCRNEISALGISKDDCPACGFVYYRESRTHFFFGRSEKSSDICWGGNPDEPKLKINGILCPRRSFDTYVQKACVESKKWTKEDINVISILRDRLCEHCHDWNMTLLENDIELSNQKYMAAVQRA
Amphora_coffeaeformis_ccmp127_METDB-00016-1-DN12345-c0-g1-i1.p1	MTIFQKIGRWGRGKKNKSSATPPPRVFTNPFTGRQSKTDREASREASGDPVTNVTKLDLYGCDAESIHLCGKIQGACGHVLFFDQPSGTIVAADERIMEVLWIQTPNDDQGDKVTSVIGVPFQACIPKNVYTSLMEAVKSMQDGLLSRTFQFVAHDGVNYAVTLASTFSDYRRISVEIEVDSQTTSHAFNATLVYLNRIMEFYANDSIAKAACDTMFGLLEGYDRGLVYKFHDDWSGEAIHEIKNEHVETSYAGLRFPALEIPPPIRNLYIKNVFRFIRDVQVEDVNIMSDPADGEIDLSHCRTRACNRCHIAYLLNMGVRASMSLAILVEGKLWGLFVFHAYRQAYKPSLHQRIAAETIASMVSARVESITRKRTSARIISLGETLMTWSQHKTFSGN…
Amphora_coffeaeformis_ccmp127_METDB-00016-1-DN263-c0-g1-i1.p1	MTMPPDEETSGDGDETGHRPPNNNGVKEISFQTSSGERIPKTSAPSVITDEELFECDHIPLHLIGHIQGNTGHVIFVTFPLGQVVAVDENIRDLEWITAPPGAPSGARAMLGTPLNAWVPKNMQQAIMRAMYHSTRNGLVRNFYFEQGYALSVVVASAEKNLFALEIEAAEGEDILDKYNDTLMYISKLVDFYANESIVNMACDTIFELFPEYDRGMVYRFNDDLSGEVIHEVRRGNLKTTYLGHRFPKYDLPLSARQLYLKNGLRYIRSSAEPNVPIVSMGSQQVDLTHVRSRSVARPHLIYMQNMGVRCSMSLAIVVENELWGLFAFHGYKRPFRPSLHQRIACEAIASMVSVRVESLIRKAASARIVSLGESLQRWNTTKSFQNNLKALGQEILDV…
Amphora_coffeaeformis_ccmp127_METDB-00016-1-DN11205-c0-g1-i1.p1	MAPPDSMEDLPFRETLVEQAQLSECDRIDLNLLGNIQGDTAHVAFMTYPEGEVIAMDRNFHRLPFMKHFKADDIQEQVIGGTIKEHFPEALHKKVTDAVEAMIEASHLREFVFYSDDTTATHLSVCVSTATPGDYSILGIEMEILDETEMLDITASSEELHKTLATAGHALDLCTTGREAARLVCDTVFKMIGHFERGMVYYFHEDLSGEVIHEIKKDHVESSYLGMHFPKSDIPQSARLLYVKNVVRYIKDVDGEDVPIISNHRAIDLTQTRSRSVHACHLIYLRGMGVKSAMSLAVVSKGELWGLIAFHGYTTPFKPMLHRLIAGETLASRVSARVMTHDKTVETTRTVLMGDVFRKWKPKSSVKENLEELGDQILSVMEADVLVARFTPADTEHST…
Amphora_coffeaeformis_ccmp127_METDB-00016-1-DN4739-c0-g3-i1.p1	MFKKVKKAIEDMVKSSLLREFVFDWDNDIFYSLCVSTTTTDIQKDTLFSIEIEILDEMAMLDICAERDTLGRTLTNIGRALDLCSTGEEAAKVACDAVFKILGDNAYDRGMVYIFHDDLSGEVIHEIKKEDLKSSYYGMHFPASDVPRSARLLYQKNMVRFIQNVDGQDIPIVSNRTAPIDLTQVRSRCVHKCHLIYCRGMGIKCCMSLALVSQGELWGLLSFHGYTAPFKPSLHQLIACEAIAACVSARIMQNVKKEKSTRLMLMGQLFQKWDPTANVLENLHVLGDQVVNVMEADVLAARVRSDKSAIWSVAKGNMDLLPRGLFWEKMSEQVPTYGLCVKSTKKTVKELDLTDVNCPGSDFVFIRNDKIEIMIGRAYRERDVVWAGDPDAPKINIGG…
Nitzschia_punctata_ccmp561_METDB-00273-1-DN5684-c0-g1-i1.p1	NNNLITEKELSECDKEQLHLIGHIQGEASGHVIFFRYPEGTIVATDAKICEVPWVRKQGDQDGSSTSARSLLSGTVQACIPEHIFKIITDATETLEKSESRRTFRFVTHNYESFALSVSGNTKINRSVIGIEIEKMEGFEAKEDFFQTLSSLGRIMEFYADDKVLVTACDTIFNLIKGYDRGMVYRFNDDLSGEVIHEIKNDSIDTSYIGMRFPASDIPLSARQLYVKNGLRYIHNVDSNDIPIVVSEGVGEIDLSNCRMRAVAKPHIVYLRNMGVVCSMSIAIVVDNKLWGLFAYHGYTRPFKPSLHQRIACESIVSMVSVKVESLTRKAQSQRVIQLSEALMKWDNTQSVSHNLSMTGAEILQVLEADVLAGRIGDPIVEGGPDHILVGDHALKPSE…
Nitzschia_punctata_ccmp561_METDB-00273-1-DN446-c0-g1-i1.p1	ILCCVHDIATMTTLGNRHVTINRVGDSISEQELNECDVMKLHLLGHVQGGAGHVMFISYPEGQIIAADMKIAQVPWVKFRGHPDNVGGSHDSRSASSFSNETGVTSEAGNHTIDSQEAMRLSQEVLGSYLQSWIPYQLYKEIFEAVEAMKKARSQRTFHFFSQHRKSYAISLSTTKRDMSVIGIEIEFVDNKERVGGFYDTLVSLGRIMDLCADGKIVTTACDTIFKLLGKFDRGMVYKFHDDLSGEVIHEIKKDTVESSYMGMRFPAGDIPLSARQLYIKNGLRYIEDVNAEDIPIIDGRNGEIDLSHCRMRACAKPHLIYLRNMGVVCSMSLAIVVDNQLWGLLAFHGYGEPYKPSLHQRIACETIKSMVSVKVEALQKKDQSVRIVELSEVLFKWK…
Phaeodactylum_tricornutum_CCMP2561_Phatr3_J54330.p1	MSGANYREADFPGVRAAGRHNNSITTKELTECDREPVHLIANVQGGTGHLLFIHYPSGKILAHDRDIEHIPWIRCHENRTVTAGRTGARTTSSFHGEQQSGESPHEAIGISGGFLLNWVPHDFYEKILDLVLGIIHSDTHRNFYFYSYDGSAYAISISATEMDYSVIGIEIETVGLDDTASHFSSSLLHLGRIVEFYQHEAIAKTACDTVFHLLGKYDRGMVYRFHDDLSGEVVHEIKANHVESSYLGMRFPSSDIPLPSRQLYIKNGVRYIYDVDTEDLPILSLDNEKMDLSQIRMRAVAKPHIVYLRNMGVVSSLSLAIVVDNDLWGLLAFHGYGARYKPSLHQRIACETISAMVSVRIESLMKKAQSARIIKLGQCTMSLKHDQSLIHNLYEWGEG…
Staurosira_complex_ccmp2646_METDB-00423-1-Transcript-14336.p1	VDNELWGLLAFHAYDKPFKPSLHQRIACETVTSMLSVRIEALLRKIQSNRLINLGDILMRWKPEKSAVHNLFNLGEKILEVVDADVLVACIEDPRKNEGDSLAVGDVSLAPRDHFWERFKTHPSRELCTCSTRAAIEAMELTQEDCPASGFVYFREGRTQIMLGRSLRSTDVVWAGDPDAPKLRIGGILNPRASFNQFMEKAKKESRSWTESDLNAIRVFRDHVCQHSHQWIMSLLKTDIDEANQKYMNALDRAQDNYEFFAHMSHELRTPFHGVMGCLNILNDSFMELSPEEVSDLVNTALASGNHMLSLLNEILKISKDKHLAHKAVQEEAIYQSLAFEAVDGLKSLAVNKSIDFKCEITPNQDKVVILTDRTKIIQIVSNIVNNAIKFVGEGSIEV…
Synedropsis_cf.recta_ccmp1620_METDB-00443-1-Transcript-14888.p1	PSLHALIFSGVEEMVQDKSLRSFRYFEDGNSSGSYAISLSPTEDDFAIVGIEIEQIDGSESSPAEFYKTLLSVSRIMECYADEDVVTASCDTVFKLLGSYDRAMVYRFNDDFSGEIIHEVKNENCGNTSYQGMRFPAGDIPTTSRLMYIKNGLRYIHNAGATNVRIVVDESFGACSSKGEMDLSHIRMRSVVNAHIMYLQNMGVKCSMSIAIVVEGKLWGLLAFHGYKKAFKPSLHQRIACETITSMLSVKMEALMKKTQSNRIIKLSEVMMLWEQNNALTSNFQRLGNDFMDIVEADVIVARIQDPSKEEPDTVVIGDASLAPGAKFWTEFEKQPKREVCTSTTRAGIASLGLTEDDCPSSGVAYYGDGLIQIMLGRGLRSKDVAWGGNPDEPKVRKD…
Seminavis_robusta_D6_Sro219_g090570.1	MARGAPSLPSKELSDCDREQLHLLAHIQGSAGNVFFVSFPDWIIIAADATVKSIPWILERGMSRMDPPSPHSVRPALNHKRLRDILGTPFSRWIPFDLAADIRTAAEEMVQTKSRRVFRFFSYRGDSYSITVFKATASKNNPYSQLGIEVELLDKTESANSFYDSLTSLARVMELYADEKVLSMACDEVFNILGKFDRGLVYKFNDDSTGEVIYETMKEGCPASSYMGMRFPAADIPLPARQLYIKNGLRYIEDVHAQNVPILHLNEGNVDLTNCRMRAVSKPHIMYLRNMGIQASMSIAILVEGRLWGLLAFHGYSGPFKPSLHQRIACETINSMLSLKMETLIKKAASKRVTQLSEKLVRWEQARSVAANLEESGKEILPILDADVMVVRIQVPTKE…
Seminavis_robusta_D6_Sro537_g162370.1	MEMFAKRRSGVGGLEESDLSSITEKELSECDKEKLHLLGNIQDGAGHVLLFSHSDGEIVAADMKIGQVPWIRIPGTPELDGVPSPSDRLEPPRKERRVEQGNESWGQGEGEVVPRTLLGHKLQECIPSKLYSSTQDAIETMKKAMSQRTFRFFNPDGSQNWAISLSSSKEDFSIICIEIEETEDFEGGGNFYNTLISLGRVMEFYADEKILKTACETVFKLLENYDRGMVYQFNDDLSGEVIYEIKKDHIDSNYMGMRFPSSDIPLTARQLFKKNGLRYIYSVNAEYNPIVDSGKCEIDLTNCRMRAVSKPHIVYLRNMGVTSSLAISIVVENELWGLLAFHGYTMPFKPSLHQRIACESIMSMVSVKVESIIRKTESSRVIELSDTLMKWEQSHSVAF…
Seminavis_robusta_D6_Sro537_g162340.1	MSMNTHIEFPKDQDRKTAASTRLADRNKISEKELSECDREQLHLVGHIQGGSGHVIFLSYPSGQIIAADAHVRAVPWVRKRGTMPLKRKGEFSSNNNNMDTTEMENKSREILGAFLQYWIPFGLYQDLFEAIEGMKMAKSTRTFHFYKHKRKSYAITLSSTSRDCSVVGLEIEEVDGNEATSDFYSTLVSLGRIMEFYVDEKIATTACDTIFNLLGKYDRGMVYQFNDDNSGEVVHEIKKDFVSSSYLGMRFPASDIPKSSRELYVKNGLRYIHDVESDETPIVDLQSRTANNNNNNNNSEMDLSQCRMRAVAKPHIVYLRNMGVLCSMSIAIVVENELWGLLAFHGYTKPFKPSLHQRIACETINSMVSVKVEALKKKAQSVRIIELSETLLRWSQNS…
Seminavis_robusta_D6_Sro537_g162360.1	MFISSPEAKILACDSMIRRIPWVRRWGGNKRPSSAISQEEDEIPEPAPATENNRKKPPPFRNHKVVVSSAPSQDQPVAESSSQQQQQTRQPTKQARKQQHSQDQQDQQERIRQQKDVESLIGTPLQDWVPFDLYTKITNEVETMKKAKSTRTFLFYEHRKDAYAISLSTTTRAFENICIEIEEVESTEAAGEFYNTLVSLGRVMEFYADEKVIKNACDTVFKLLEHYDRGMVYRFNDDNSGEVIHEIKKDKVTTSYIGMRFPASDIPLPARKLYIKNGLRYIENVDARDIPIITAEENGQMDLSHCRMRAVSKPHLVYLKNMGIVCSLSVAIVVDGDLWGLLAFHGYSRPFRPSLHQRIACETINSMVSVKVESIMKKAQSVRVIELSEALIKWDPNED…
Navicula_sp_ra120910p2a1_METDB-00269-1-DN24160-c0-g1-i2.p1	MNTAAGRASINQDHNKISEKELTECDREKLHLLGHVQGGSGNVLFFSYPDGQIISTDANIREVPWIRQRGTPSKQREGHNGEDADTLSTASTTTSSRSFLNRKRDHDEMESGGMQLLGSYLQFWVPYQLYLEIFDAVEGMKKSKSTRTFHFCKHKRNSYALTLSTTSWDCSVVGVEIESVDGKEATSDFYSTLVSLGRIMEFYVDEKIVKTACDTVFKLLGHYDRGMVYQFNDDLSGEVVHEIKKDTVGSSCLGMRFPASDIPLSSRQLYIKNGLRYIYNVDAEDVPILDSRGSTSDIDLSAIRMRSVAKPHIIYLRNMGVVCSLSNAIVVENKLWGLLAFHGYTKPYKPSLHQRIACETINSMVSVKVEALQKKAHSVRIIELSETLMRWAQTSTVVN…
Navicula_sp_ra120910p2a1_METDB-00269-1-DN21723-c0-g2-i1.p1	MMAAASPTTGNEASAMETESTASRDAASPMEEDKKEGSHNDVITDKELSECDREELHLIGHIQGDAGHTLFITYPEAKITGADAQIGAVPWIRQRGAASKRRCGDDNNNNTMAADQKQEAQPSKQNGGLKQSAQPSNQNGADTSYTRELIGAALQCWIPDDLYTEVMQAAESMRKAKSTRTFLFYEDHNNAYAISLSTSSHNHSVICVEIEDVESTEAAGDFYNTLVSLGRVMEFYADEQVLKNACDTVFKLLEHFDRGMVYQFNDDNSGQVIHEIKRDDVTTSYIGMRFPASDIPLSARQLYIKNGLRYIENVDAKDLSIISEEGSEVDLSNVRMRSVSKPHLVYLRNMGIVSSMSVAIVVEHELWGLLAYHGYKKTFKPSLHQRIACETINSMVSVK…
Nitzschia_sp_ChengR-2013-ZJU_GBCF01003978.1.p1	WCALFLLVGWHLTCRLLLRKRDRFLTMKDPSTQSTFPCTSAGHEFGCNSKRTSEEMIKERVENFSEEDKRSSVWQKELSECDREDLSHIGLIQGGCGHVLFIKHPSGVIIGHDQDIHQVEFLLPPQKSESSSSKLSIIGTRLKDCIPPQLHATIVDCISQMRMAMSYRTFSFYAVSDKTFALSISSTEPDYSVIGIEIESTPDSQESADSFCSTLVQLGRIMEFYANDSIASMACDAVFGVMEHYDRGMVYRFNDDLSGEIIHEITNGTLSTSYLGMRFPQSDIPLPARKLYITNGLRYIHDIEIDSIAVLANPSQSMDLAQIRMRAVARPHIIYLRNMGVRSSLSIAIVVNGELWGLLAFHGYQKAYKPTLHQRIACETISKMVSVRIESMEKKKESE…
Nitzschia_palea_CPCC-160_GHBX01004333.1.p1	MMCATTHDEAHMSSHMNTQMEEEEPVPHEESKEREREDNLIEDRRNNITQKELSECDREDLSHIGLIQGGCGHVVFIKHPSGVIIGHDQDIRQVEFFTPPPREPSKVSLIGTRLMDCIPPQLHGTIQDCISQMRMAMSHRTFYFYALTGKTFALSISSPEPDYSVIGIEIESSPDSQESADTFCSTLVHLGRIMEFYANDSIASMACDAVFNVMQHYDRGMVYRFNDDLSGEIIHEITNGTLTTSYMGMRFPQSDIPLPARQLYITNGLRYIHDIEMDNVPVLAYPSQSMDLAQIRMRAVARPHIIYLRNMGVRASLSIAIVVNGELWGLLAFHGYQKSYKPTLHQRIACETISKMVSVRIESMEKKKESERIMQMGDVLMNLSSEMSISENLRRVGET…
Nitzschia_palea_CPCC-160_GHBX01012832.1.p1	MMCATTHDEAHMSSHMNTQMEEEEPVPHEESKEREREDNLIEDRRNNITQKELSECDREDLSHIGLIQGGCGHVVFIKHPSGVIIGHDQDIRQVEFFTPPPREPSKVSLIGTRLMDCIPPQLHGTIQDCISQMRMAMSHRTFYFYALTGKTFALSISSPEPDYSVIGIEIESSPDSQESADTFCSTLVHLGRIMEFYAKDSIASMACDAVFNVMQHYDRGMVYRFNDDLSGEIIHEITNGTLSSSYLGMRFPQSDIPLTARQLYITNGLRYIHDIEMDNIPVLAYPSQSMDLAQIRMRAVARPHIIYMRNMGVRASLSIAIVVNGELWGLLAFHSYKKPYKPTLHQRIACETISKMVSVRIESILKKKESERIMQMGDVLMNLNPEMSISDNLRKAGET…

## Sheet: Sheet3
Diatom aureochrome sequences used to build the hmm models
Gene	Sequence
Amphiprora_paludosa_Strain_CCMP125_CAMPEP_0172445846	MNNLNPLFAPASSVNNGQQQAQDDFDLNEVFAEYFTNEFDIDPLNAYTNSMANFSGSVLPPSMPTAAQVHAAATAAQGQPSVGVAPAAPGPATVATTEGGYSLPTGGIKTAFHLGSSIATRHPGAIAPPQKKVKQESVNPETVLAPSTMAATVASPVAQLALAHQQASNAAAAQQQLQQLQASNQQQMAQFQAAQATQMMQAGAATAAVNSATGGMALPVGVGIRLGGLGGIAPATAQNAPPVMQAQYAAALWGGAGALGASSEQAVAERRQRNREHAKRSRVRKKFMLESLQEEVRSLQKENQHLRMLVQEHVPTKAMDIIAECCTTSPLFAEGLMEEQGNQDDPTKLGRSDFSLMESLTSGQRCFVLSDPKLPDNPIVFASPDFYTMTGYSSKQVLG…
Amphiprora_paludosa_Strain_CCMP125_CAMPEP_0172455968	XTKQSKDIKDQNNPTMADKNVPPPLFAPTHLSAEAQAAVNQRGTPATLNLDDIFGDVVFTPDGDTVFLSEQNEEGGVMGSGEGENVATAASKPTADGQFKPVAQGGGLYTTALMDNGKAASAMGSASAAPKPTAAVPFKRAPQKSNHLQYAAPKKKKESRSSDRKMSEQQKVERRERNREHAKRSRIRKKFLLESLQQSVSLLKDENEKLRSSIRTHLGDERATELLNSSKDTSVDGLLANSQSIANKVLDDPDFSFIKALQTAQQNFVVTDPGLPDNPIVYASQGFLNLTGYSLDQILGRNCRFLQGPETDPKAVERIRKAIEQGHDMSVCLLNYRVDGTTFWNQFFIAALRDAAGCVTNFVGVQCKVSDQYAATVTKQQEEEEAAAAAGDDD
Amphiprora_paludosa_Strain_CCMP125_CAMPEP_0172471426	MDEPIHVSYENGGGAPSSSGGGDFWENSNHVVDGDLDEPGINVDLLAEAFFNDTAAAVDGNLEEGGVFGMNGGELLQYQQQEPGLLPGQAAPIEDDFPESQAFTEPLQQQQQQQQSFLFAGNADNMFGQQQQPQVALVASAPAPMSNSHTQQQQQTQQFVAIAPALPNMTPEQQQQAAAVAASAWVTAGTSQNNTNDNGNGQGVVTPMPNPFLALAGSMPMATREQFFAQAFAQRAQSRKGRQMSVEQAERRRERNRQLAKKTRDKKKTHMEELQQQVLELQRANAELKHMVKNNIEDSNNILDQCDAIDKVPETVWEACGTDRQEIAADDFDMVSSIQKSQTAFVITDPSFEDNPIVFVSPDFLAMTGYSREQVIGRNCRFLQGTHTCPDKVNEIRQA…
Amphiprora_paludosa_Strain_CCMP125_CAMPEP_0172473084	MDNQQMQMPMFAQASAVATAGASPAPAAQSDWGDPSGGADFDVEMLAEYLLEDAMTFGANGGLTFDFKMDNGGSGVVSPENSEDGAQPPVADAAAYTPTPVVPAPVAPAPVPIAPTPIAPTPVTAPQAAPAPIPMAMFQPTLVAATGPAPSTTPAPSMPQAVQAAPAAGGMVYHQHAATAPQPAAPPANKRQRVNPPVTPANIAPVPAYAQMPVQTQQQAMTGMLVPAPPGHPGGHQMLATSQPHLQLMNNAAAAAAASLQLSGQQLAAAAAQAMQAQAAGARGGRRRSQAQIDRRRERNRILARRTRLRKKFFFEALQKEVMDLQKENAQLKEVVRNHLDKEQSKKILSECDAMEKMPPSVLEALGEVDGFDSKDFNLVRSIQGSQHAFIITDPSLPD…
Amphiprora_paludosa_Strain_CCMP125_CAMPEP_0172475138	MTIIIALTTTTPLVSNQQIDLDELFNDIYYLEQKGIPDPSPVGPTTSNAQATAPAPAPAVEDKKRSADQAGLASAAQDKDDGVLPDETESGNKDLTEQQKIERRERNREHAKRSRLRKKFLLESLQGQINELEEQLSGLKAAIKTEIPSPRAEQLIQSICGDKEKYTPLPMPSGFGPVKTLMEPDFRLMSALSGSQQNFAISDPTLPDNPIVYCSQGFLDLTGYTLDQVLGRNCRFLQGPGTDQSAVQVIRKGIAEGVDTSVCLLNYKADGTPFWNQFFVAALRDAQNNVVNYVGVQCEVSKAVVEKHMPAPMKRVT
Amphiprora-sp_CAMPEP_0186481924	MDQPVTISYNDDPAPNSGNFVWEDPQDGADNNATSNLSNLDLGPDLDMDLLTEALFEGHNNNNGEGNSNNPDIAAMFGNVVGDDEFPPQEPGLLPGQGDSIDPPLDDDFPAVQGFGAFSNNTPPQTQVAGSPVPVSVSPMENMQEPQQPALVSSSPGAAAQQQQQQFVSIAPNFPPDQQQNAMAAAAAFMAAQQQQQSEAGGGGSDGMMGNPFLALAAAGGALPMANREQFFQAAFEQRAKTRKRQMTSEQAERRRERNRQLAKKTRDRKKNHMEALQEEVLELQRANAELKAMVRTNLDQKESETILDSCDAIDKVPQTVWEACGTDKQELAADDFDMVSSIQKSQTAFVITDPSFEDNPIVFVSPDFLTLTGYSREQVIGRNCRFLQGAHTDPDKVN…
Amphiprora-sp_CAMPEP_0186482700	MAEQTNGEHVPMFKVSDPVTTQQIDLDELFNDIYYLEQKGIPDPTPVSSNSEAMVAPPADTDNQKKRSAEAAGINTTMTAAAASSSEPENTTATMTDNINAALPDEAESANTKDLTEQQKIERRERNREHAKRSRLRKKFLLESLQGQINELEEQVSGLKNALKQELPAHRAEHVIASICGDKEKYTPLPMPSGFGPVKTLMEPDFRLMSALSGSQQNFAISDPTLPDNPIVYCSQGFLDLTGYTLDQVLGRNCRFLQGPGTDQSAVQVIRKGIAEGVDTSVCLLNYKADGTPFWNQFFVAALRDAQNNVVNYVGVQCEVSKAVVEKHMPAPAPMKKVT
Amphiprora-sp_CAMPEP_0186497784	MSDKNVAPPLFAPTHLSAEAQAAVNSKGTPATLNLDDIFGDVVFTPEGDTVFLSEQKEDDIMGSGEGDKVATAASKVTADGQLKQVAQGGGLFTTHLHDPSQASSAMGTAGAAKPTAAVPFKRAPQKSNHLQYAAPKKKKDARSSDRKMSEQQKVERRERNREHAKRSRIRKKFLLESLQQSVSLLKEENEKLRSSIRTHLGDERATQLLNSSKDTSVDGLLANSQTIANKVLDDPDFSFIKALQTAQQNFVVTDPALPDNPIVYASQGFLNLTGYSLDQILGRNCRFLQGPETDPKAVERIRKAIENGNDMSVCLLNYRVDGTTFWNQFFIAALRDASGCVTNFVGVQCKVSDQYAATVTKQQEEEEAGDE
Amphiprora-sp_CAMPEP_0186504310	MENNQQIQMPVFGKSSGSAPSQSEWGEDPGADFDVEMLAEYLLEDPATFDASGQLSFDFKIDNGGSGVVSPENSEDGAQPPLADAPKAIPNPLGATASTVPARATPSAPAPAVYAQAAPAPTPIAPKQAIPAPAPAMAPAPYGNAPAPVPLHMYQATLAAAASQTTAAAQRASQPAGGLIYHQHAPGPASANAASAAAAASNKRRRTESAQLAPAAMTPVAPMPPFQPTLARAPPGPTAHVQVPGIVSHPNAPMLAVASGQPHALMMNHAAAAAAASLQLSGQQLAAAAAQAMQAQAAGTGGRGGRRKSQAQIDRRRERNRILARRTRLRKKFFFEALQKEVMDLQKENVKLKEIVRSSLEEEHSKKILNECDAMEKMPPSVLEAIGEVESFESKDFNF…
Amphiprora-sp_CAMPEP_0186506270	MSHLNPLFAPASGVNGGKPAQDDIDLNEVFAEYFTNEFDMDPLNAYTNSMANFSGSVLTPSMPAAAAHAVVTASQGQTANAPTTTSTPAPATVATTDAGYSLPTGGIKTAFHLGSSVATRPVTAAAPPQKRPKAEAGAPAALLAPPAALAPSAAGLAASVASPVAQLALAHKQATTAAAAQQQLQQFHANNQRQLTAQFGAAAAQAQQLAAVQGAAAPAPVAGGVALPVGVGIRLGGLGGIAPATAQSAPPVLQAQYAAAALWGGPGVMGASSEQAVAERRQRNREHAKRSRVRKKFMLESLQEEVRSLQKENQNLRMLVQEHLPTQAQNIIAECCTTSPLFAEGMETEDDATKLGRSDFNLMESLTSGQRCFVLSDPKLPDNPIVFASPDFYTMTGYS…
Amphora-coffeaeformis-CCMP127_CAMPEP_0186522322	XSASQNNQDDFDLNEIFAEYFINEFDDPLNAYTSSMANYSGTNAIPQGLPGSIPMNHQSHNSGGGGVMDHIHHGNNNNANNHQQGAVADGGNTKKTSLPTGGIKTAFHMGTTKPTKGVSEEPPANKRMKQEEQQQQLHQGFLNALQQQQQQQQHPGQALIAPSGGIPMATSGGGVSLPVGVGIRLGGVGGIAPSTAQSAAVRTGGVQTPYTLWAAGGMSGLPGHLGGAGGPNDMVSDQAIAERRQRNREHAKRSRVRKKFMLESLQEQVRALQSENGELRMLVQEHIPDKAMQIIGECCTTSPLFNEDQDEGGDDSKPAAERKSTDLERSDFSLMQSLATGQKCFVLSDPKLPDNPIVFATPDFYTMTGYTAKEVLGRNCRFLQGPGTSQRAVEVIRKA…
Amphora-coffeaeformis-CCMP127_CAMPEP_0186526956	MADSGNIAPIFLPDNDGPSTIDLDDLFNDIYYMDLPHATTSEPAASMPSDDISAPTSVAAPPPVPSAAHPDKKRSAEDAELGSDGKELTEQQKLERRERNREHAKRSRLRKKFLLESLQDQIHGLEEQLDGLKNAIKAELPDKAEHIITTVCGSKEKYTPLPMPSGFGPVKTLMEPDFRLMSALSGSQQNFAISDPSLPDNPIVYVSQGFLDLTGYTLDQVLGRNCRFLQGPGTDQGAVEVIRKGIKEGVDTSVCLLNYKADGTPFWNQFFVAALRDAENNVVNYVGVQCEVSKAVVEKHMGEQKAT
Amphora-coffeaeformis-CCMP127_CAMPEP_0186528496	MPDISMPMFGRAGQGPNQADWGEVDNFDVELLAEYLLEDSSGVPGVTFDFNSAMENNGIVSPENSEDGGIPTIADMSAGFSMAMSQQQHQFMHHPNTGTMTGSIPLAPAPFPNLPVQVPNLASAPAPMSFIQHAPPASAAQQAPKRRRVEDGMAAVTSMPDPSTFFERTATRCCCRPSSFAGSGTQKSPRPKSIEDGNVIVSWRVEHVCAKSFSLRASKRNRRSLPLSSIGTKSIQLTVECALFSFVFERDNRKEFXKMPDISMPMFGRAGQGPNQADWGEVDNFDVELLAEYLLEDSSGVPGVTFDFNSAMENNGIVSPENSEDGGIPTIADMSAGFSMAMSQQQHQFMHHPNTGTMTGSIPLAPAPFPNLPVQVPNLASAPAPMSFIQHAPPASAAQ…
Amphora-coffeaeformis-CCMP127_CAMPEP_0186529944	MTDPNVPPPFFTSKSASIKPVASGRAGTAALNLDDIFGDVVFTPDGDTVFLSEDKDGIMNSGETEVANMASRPTVDGKYAPVSMGGGLYTTALADSGQRSSAMGRAGDARQMESVPYKKAPQSRNHLQYAAPKKKKSSKSKKGDDNSKEERRERNREHAKRSRIRKKFLLESLQQSVDLLKAENEKLKNSIRQNLGSAKAEQLLNKSSSGANVDGLLASSQGIANKVLDDPDFSFIKALQTAQQNFVVTDPSLPDNPIVYASQGFLNLTGYSLDQILGRNCRFLQGPETDPKSVERIRKAIEQGNDMSVCLLNYRVDGTTFWNQFFIAALRDANGCVTNFVGVQCKVSDTYAATVIKQQEEEEAAAAADAE
Amphora-coffeaeformis-CCMP127_CAMPEP_0186534294	XAAIAQRGNPQTLNLDDIFGDVVFTPDGDTVFMSEQQGNITNSGEGNQFANVASRPTQNGNFAPVPQGGGLYTTQLADASKMASAMGKAGEAQATASVPFKQAPQASHHLQYATATASSSKKRKAVESRPGDRKMSEQQKVERRERNREHAKRSRIRKKFLLESLQQSVTLLKEENEKLKNSIKQHLGEEKASALISKTTEASASDGLMATGQGIANKVLDDPDFSFIKALQTAQQNFVVTDPSLPDNPIVYASQGFLNLTGYSLDQILGRNCRFLQGPETDPKSVERIRKAIEQGNDMSVCLLNYRVDGSTFWNQFFIAALRDAGGNVTNFVGVQCKVSDTYAAX
Asterionellopsis_glacialis_CAMPEP_0184875388	MADSNHAAADANANAEVANDPVPMFAPSDPNATGGDSPVDLDDLFRDCYFGEFPVPPMDQPAEPVADGGGQKRSAEEAGLPAQPASTPTPAPAVSAAPKEESSKELTDQQKIERRERNREHAKRSRLRKKFLLESLQEQIHGLQGEIDTLKDIIRKELPDRAEELMSKIGGDKSKFTPLPMPSGFGPVKTLMEPDFRLMSALSGSQQNFAISDPSLPDNPIVYVSQGFLDLTGYTLDQVLGRNCRFLQGPGTDQSAVDIIRKGIREGVDTSVCLLNYKADGTPFWNQFFVAALRDAENNVVNFVGVQCEVSKAVVEKHIADGKNPATVKP
Asterionellopsis_glacialis_CAMPEP_0184875640	DPLDFDLLAEYLLDDNTSFQAGYGTVLPDFDFAVDSAPASGVVSPDQTEDGTGAFPRVSPAATAVNVSTAPAPAPFVLPTPPNPILHQEPSSVPAPAPTLYMPQTNQAPAVTVAPLSSAPTIVSYQHAPNAGAPVPSNTNKRRRVDIPPTPAPAPVVAPLTKTLFTTNGVVPAPTPHMVAQAIANGGSTAASGRKKTQAQIDRRRERNRILARRTRLRKKFFFESLQKEVIDLQRENVALKEIARTKLDPQVSKTLLDDCKAVEKLPSELAEACGETGELAKQDFSLIKSIQTSQQCFVITDPSLQDNPIVYASNDFLSLTGYAREEVLGRNCRFLQGTETSASKIEQVRKAIANGEDVTVTMINYTADGTAFWNKLFIAALRDAQNNIVNFIGVIVKV…
Asterionellopsis_glacialis_CAMPEP_0184885722	MAEQPPVPLFAPGSSADEQNVPGMSTATAAAVAQRGTPATLNLDDIFGDCFFTPEGETVFSDEVQEGVLPSGEGQNVANVASKLVANTQSYQAVQAAGGIQTTNLDKPGQRATVMGGPAPTGGTAPKQPFQQAPQRQHHMQFATPASASALKKRSRNTTSGRSSSERKMSEQQKVERRERNREHAKRSRIRKKFLLESLQQSVALLKEENDKLRDSIRSHLGDDEAEDLLKQGLSEQAAGGGLIASSAGDANKVLDDPDFSFIKALQTAQQNFVVTDPSLPDNPIVYATQGFLNLTGYTLDQVLGRNCRFLQGPETDPKAVEKIRRAIEEGNDMSVCLLNYRVDGSTFWNQFFIAALRDASGNITNYVGVQCKVSDQYAANVCKKQEEEAAAAAAAENE…
Asterionellopsis_glacialis_CAMPEP_0184899102	MSNAYQNSFQQPMFAPAQGNQQLGDDIDLNEIFADYFISEFDDPLNAYTSSMANYSGAAAAMALAQKQQQVVAAATTTPNSAPLAAPPAMSTLPTGGIKTAWHTGTTTQPANASLAQQQQPQQQQQLQQQQLQTQVPPPKRVKTEGENQGSAGGGLSGRLGFSMVGGQLAMPGGEQQQQAVAAPVPTSSGNVQLPVGVGIRLGGVGGVAPSTAQNGTARPAVGGAPQPGQYNMGWGGFPGQQGGQGGGGMSEQAIAERRQRNREHAKRSRVRKKFMLESLQEQVRQLQKENVNLRMIVQQKIPQHAQNIISECCSKSPLFTEIGDDTPALGSNAAQTETELVKSDFSLISSLTSGQQNFVLSDPRLPDNPIVYASEGFYELTGYSREQVLGRNCRFLQG…
Asterionellopsis_glacialis_CAMPEP_0184900718	XVAPVPLLGHGNAMLQATTPMGVVNPLAAQQQQQATAMGMGMGVPTPLGAPPQHPQIVQPTQVPTTVQHTRYDQATSNFKEEIRRRDAGAKARQQQRNREHAKRSRARKKEAMSLLEEEAEELRQENERLKQIIRQKIPERAQTIFKECNLHQGDFQLLENLSAXXXXXXXXXLENLSANKQSFVLTDPRLPDNPIVYASERFCELTQYARDQVVGRNCRFLQGPDTSHKAVEVVRNAIRKGVDGTTVMLNYKADGTPFWNRFFVAALRDRDHKIVNYVGVQCEQDGPQDALLESNIPPDEAESSSPAIQPVVPGTMNSATTTGMTNNVATAGGTNGLKKDEGLNKGGMAIPFLPEETADGMIPFIEPKDHTVLDDDDEKNDIEQLDWSILAEALEADY…
Asterionellopsis_glacialis_Strain_CCMP134_CAMPEP_0199878342	MAPVSIPRFASSSTAAGQTETSTPAWGNLAQEGAADPLDFDLLAEYLLDDNTSSQAEYGTVLPDFDFTVDSAPVSGVVSPDQTEDGTGAFPRATPAAPAPAAPAPAPAAPAVDVSTAPAPAPFALPHPPNPILRQEPVSVPAPAPTLYMPQTNQAPAVTVAPLSSAPTIVSYQHAPNAGAPVPSNTNKRRRVDIPPAPAPAPVVAPLTKTQFTTNGVVPAPTPHMVAQAMAANGGTTVVSGRKKTQAQIDRRRERNRILARRTRLRKKFFFESLQKEVIDLQRENVALKEIARTKLDPQVSKTLLDDCKAVEKLPSELAEACGETGELAKQDFSLIKSIQTSQQCFVITDPSLQDNPIVYASNDFLSLTGYAREEVLGRNCRFLQGTETSASKIEQVRK…
Asterionellopsis_glacialis_Strain_CCMP134_CAMPEP_0199881024	MSNAYQNSFQQPMFAPAQGNQQLGDDIDLNEIFADYFISEFDDPLNAYTSSMANYSGAAAAMALAQKQQQVVAAATTTPMSAPLAAPPSTSTLPTGGIKTAWHTGAATQPANASLAQQQQPQQQQQQQQQQLQTQLPPPKRVKTEGESQGSTGGGLSGRLGFSMVGGQLAMPGGEQQQQAAAAPAPTTSGNVQLPVGVGIRLGGVGGVAPSTAQNGTARPVVGGAPQPGQYNMGWGGFPGQQVGQGGGGMSEQAIAERRQRNREHAKRSRVRKKFMLESLQEQVRQLQKENVNLRMIVQQKIPQHAQNIISECCSKSPLFTETGEENPSTGANPAQTETELVKSDFSLISSLTSGQQNFVLSDPRLPDNPIVYASEGFYELTGYSREQVLGRNCRFLQG…
Asterionellopsis_glacialis_Strain_CCMP134_CAMPEP_0199881768	MSTNTINDSERLRGLHAIFPQAAIGVAPAPLLGHGNAMLQHTTPMGVVNPLAPQQQQQANAIGMGMGMGMGVPTPLGALPPHPQIVQPAQVQGGAALSSSATTTTTTTMQHTRYDQATSNFQEEVRRRDADAKARQQQRNREHAKRSRARKKEAMSQLEEEAEELRQENERLKQIIRQKIPERAQAIFKECNLHQGDFQLLENLSANKQSFVLTDPRLPDNPIVYASERFCELTQYARDQVVGRNCRFLQGPDTSHKAVEVVRNAIRKGVDATTVMLNYKADGTPFWNRFFVAALRDRDHKIVNYVGVQCEQDGPQDALLESNIPPDEAESASPIIQPVVPGTTNSTTGMTNNVATAAGANGLKKNNEGLNKGGMAIPFLPEETPQGIVPSIEPKDHTI…
Asterionellopsis_glacialis_Strain_CCMP1581_CAMPEP_0197142156	MSNAYQNSFQQPMFAPAQGNQQLGDDIDLNEIFADYFISEFDDPLNAYTSSMANYSGAAAAMALAQKQQQVAAAAAGSTPTSAPLAAAPSMSGLPTGGIKTAWHTGSAAQPANGSLPQQQQQLQQQQQVGQLPPPKRVKTEGESQESRGGGLSGRLGFSMVGGQLAVPGGEQQQQQPAAVPAPTTSGNVQLPVGVGIRLGGVGGVAPSTAQTGTVRPAGITPQAGQYNMAWGGFPGQQGNQGGGMSEQAIAERRQRNREHAKRSRVRKKFMLESLQEQVRQLQKENVNLRMIVQQKIPQHAQNIISECCSKSPLFTEMGEENAREPGKTETELVKSDFSLISSLTSGQQNFVLSDPRLPDNPIVYASEGFYELTGYSREQVLGRNCRFLQGPGTDQRSV…
Asterionellopsis_glacialis_Strain_CCMP1581_CAMPEP_0197144410	MSEQPPVPLFAPGGNADDQNVPGMSTATAAAVAQRGTPATLNLDDIFGDCFFTPDGETVFQGEEIQDSVLPSGEGQNVANVASKLDPSTQSYQAVQAAGGIQTTNLDKPGQRASVMGTSGSTTAPSAAPKQSVPFQQPPQRQHHMQFATPASASALKKRSRNTTAGRSSSERKMSEQQKVERRERNREHAKRSRIRKKFLLESLQQSVALLKEENDKLRDSIRSHLGNDEAETLLKQGLSEQAAGGGLIASTAGDANKVLDDPDFSFIKALQTAQQNFVVTDPSLPDNPIVYATQGFLNLTGYTLDQVLGRNCRFLQGPETDPKAVEKIRRAIEEGNDMSVCLLNYRVDGSTFWNQFFIAALRDASGNITNYVGVQCKVSDQYAANVCKKQEEEAAAAA…
Asterionellopsis_glacialis_Strain_CCMP1581_CAMPEP_0197144654	QRPAMSLAISNMAPVSLPRFASSSASGNANGQAETTSGWGSLAQDGTADALDFDLLAEYLLDDNTSAPAHNSFGTVLPDFDFTVDSAPASGVVSPDQTEDETGAFPRASTGAPAVDVYTAPAPAPLSHPGAPMSNPGAPLVSPPASVPAPAPTLYMPQTNQAPGVGMAPLSSAPTIVSYQHAPTIGAPVAQNNINKRRRVDAPAAAAPAVAPLAKTHLNTNGVVPPPTAHMVAQAFANGGTTTASGRKKTQAQIDRRRERNRILARRTRLRKKFFFESLQKEVIDLQRENVALKEIARNKLDPQVSKTLLADCKAVEKLPSELAEACGETGELAKQDFSLIKSIQNSQQCFVITDPSLQDNPIVYASNDFLSLTGYAREEVLGRNCRFLQGTETSPQKI…
Asterionellopsis_glacialis_Strain_CCMP1581_CAMPEP_0197145862	MADDNPPPAETNGKEPVPMFAPSDPNASVSDNPVDLDDLFRDCYFGEFPVLPMDQPDQPATDGGQKRTAEEAGLPAQPAPTPAPASSASATASKEDSSKELTDQQKIERRERNREHAKRSRLRKKFLLESLQEQIHGLQGEIETLKDIIRKELPDKAEALMATLGGDKSKFTPLPMPSGFGPVKTLMEPDFRLMSALSGSQQNFAISDPSLPDNPIVYVSQGFLDLTGYTLDQVLGRNCRFLQGPGTDQSAVDVIRKGIREGVDTSVCLLNYKADGTPFWNQFFVAALRDAENNVVNFVGVQCEVSKAVVEKHIADGKTPSTTKP
Astrosyne_radiata_Strain_13vi08-1A_CAMPEP_0116829846	XEPDFRLMSALSGSQQNFAISDPSLPDNPIVYCSQGFLDLTGYTLDQVLGRNCRFLQGPGTDQNAVEVIRRGIQEGVDTSVCLLNYKADGTPFWNQFFVAALRDAENNVVNFVGVQCEVSKAVVEKQMKQNGTAATTTKST
Astrosyne_radiata_Strain_13vi08-1A_CAMPEP_0116839448	MFSHDRPFSSDAALKAQAMSVDIFGMQPVSLPRFAAAHNAPVQTAAINHPGRSGLPNEAAAAPGDGLDFDLLAEYLLDEGGTAGPAAGMPQFDFSVDSPPASGVVSPEQQSEDGLQHAMTESAPVASAPIALQQPAIPQAGALQAPIAQAPAFLQPGMPLPPAPTASPFPTLHAAVPTTVPAPIAAAPAVMISQQTAPALDGVPGNKRRRVEQAMLPVPTAAPAAIMNGNLMAHTIPGRGRQKTQAQIDRRRERNRILARRTRLRKKFFFESLQKEVTDLQRENTILKELVRKKLDPEKSKELLEGCKAIENLPSAVTEACGENVEGMDQQDFNLVQSIQQSQQCFVITDPGLQDNPIVYASDDFLTLTGYKREEVLGRNCRFLQGTETSPEKVESVRK…
Astrosyne_radiata_Strain_13vi08-1A_CAMPEP_0116842310	XLNDKMSGQPSAPLFAPTEPGLSDTATAAVAQRGTPATLNLDDIFGDVLFTPEGDTVFMSEVQASPDAPVINSGEGDKVADHASRFDGDKSVPVANAGGIPTTQLDQPGKPSLIMGPAGSTPVERVPYKQTPQQRHHLQYAAPEQIAAMKKRRGGKGSERKMSEQQKVERRERNREHAKRSRIRKKFLLESLQQSVSLLKEENEKLRQSIRSHLGAAEADELLGTSLSKSGEAGLIANSSVDANKVLDDPDFSFIKALQTAQQNFVVTDPSLPDNPIVYATQGFLNLTGYTLDQVLGRNCRFLQGPETDPKAVEKIRKSIEEGTDMSVCLLNYRVDGTTFWNQFFIAALRDASGNITNYVGVQCKVSDQYAANVCKKQEEEXEEVEAS
Attheya_septentrionalis_Strain_CCMP2084_CAMPEP_0198281146	MTTTTTSESDPSPVNNPLYPQAPRFASSSNNQTNNNNYAGAANNNTTNAVAPLSSSSLQAVANKGTPATLNLDDIFGDCFFTPDGDTVFLSDQQQQSQQQQQQDGNQNHLNNQYPNMIQSGESQVTHYASKPSTLTHPNQQQHQLQPPMTHSSNVYVPVAQGGGLATTNLDKNPATHRALVMGQAPASSLSSAAPNSNPNNKQQQQQLAKPRQTVPFVQPPQQRHHMQFVAPALPNNTNSNSNSKSSKTTKRSRGSSALAAERKMNDRQKVERRERNREHAKRSRIRKKFLLESLQQSVALLKEENEKLRTSITQELGEQEASQLLTSQNLVHLAANAAGGGKDLIAHNSNEANKVLDDPDFSFIKALQTAQQNFVVTDPSLPDNPIVYATQGFLNLTG…
Attheya_septentrionalis_Strain_CCMP2084_CAMPEP_0198282142	MSTSVLNMYNGTIPRFSSASAVKKGQSGQNTKDESEDTLDFDLLAEYLLDDGMMIPGSNGFDFGIDFPTGSSTPGVVSPDHEASNADPLADAATLIGNNGAENRGDLAGDLAHVQQMIAAHATAAQHKINVSPATQAPIAPSMPGTTAIAPAPTSRGGMPMTVPRMNTSAPASLAPAIHGVPMATHHMHHASMPATKRKRADTAATSNKTINMNMHGFPQGIPPRNGRQKSQAQIDRRRERNRILARRTRLRKKFFFESLQKDVTDLQKENVALKEVVRTKLEPAKAKAVLDSCDAMEKLPSDIAETFGIGELDRRDFSLIHSIQKSQQCFVITDPSLQDNPIVYASDDFLSVTGYSREDVLGRNCRFLQGTETSADKVESIRKAISQGEDISVCFINY…
Attheya_septentrionalis_Strain_CCMP2084_CAMPEP_0198285798	MSNNNNANVANAGGQKLLFAPRGNQYNEDFDISEVFADYFTTEFEDPLNAYTSSMANFSGGAASVALGQQQQQQEEEQQKNHHEQQQYDSTIQSNTGPQNNFPLATAPATTTNSAVILPTGRGIKTAWHTGAMPSLASSGTYQQSQGPQSFAPLGKKPKFVQEATTTSSLSTLPLAVPQQSQQQQTSTALPTGGSALSGRLGFTMTPGGQVNIPHRVQQQNPPPTAPPPSSSTSLAPVPVMSLPVGVGIRLGGIGGVVNPGQTTTGGGMQMTHTQWNNAPGGSKLAHVQHAPTPTQYNPVTGQYNMQWPGMPGGYGNESEVGMSETAIAERRQRNREHAKRSRVRKKFMLESLQEQVRALQKENVELRMIVQEKIPHHAQQIIDVCCTKSPLFEDDPQK…
Attheya_septentrionalis_Strain_CCMP2084_CAMPEP_0198288764	MESLWSLFSSHEVDEDQNVLHRPVTPFSSPSPPPPPAKRAKLSSEEGAFQQGGFVNNPLLLPHHVNTFRHPISIDREVEHVVKGIRLENRKRSNAVHAKKSRERNKQFVASLELESQALQKENDCLKALVKKSFPDRAQSIIGECCYKPRGEGFPQGTQTSRLAHIVGSDFDLIESLTSGGHSFVLTDPRLPDNPIVYASSAFFNMTGYTRDTVVGRNCRFLQGIDTKNEAVNTIREAIKSGTDGAACLLNYKADGTPFWNNFFIAALRDRDHRIVNYVGVQSEVDKSTSKNDTSLDFMNLKPALPNHFQKVEKVIPVFSANLKPGPKDPENITVCPIEADHTVSLADAQISGVEAEGEYDDDDIDWADLAEVLEAEYQDGCDGSEGGESTTNWMDEDI…
Attheya_septentrionalis_Strain_CCMP2084_CAMPEP_0198289824	MASNEPNSKGNLPMFAAGPGDDNNNLDLDDIFRDCYFGDFPVAPFSEAAPETVPSSVPASLKRKAEDEMPPPVSSSGAIDDDSKPLTEQQIVERRERNREHAKRSRLRKKFLLESLQEQIHGLMGEIDQLKGIIQTELPDKAEGLLAGISDAEKSKYTPLPMPSGFGPVKTLMEPDFRLMSALSGSQQNFAISDPSLPDNPIVYVSQGFLDLTGYTLDQVLGRNCRFLQGPGTDQSAVDVIRKGVREGVDTSVCLLNYKADGTPFWNQFFVAALRDAENNVVNFVGVQCEVSKAVVEKQIAEGKQPRPSRPL
Aulacoseira_subarctica__Strain_CCAP_1002/5_CAMPEP_0172415362	LASNTSNTSSLAPMRQTPLTYDNGIMTASAGASSSNQFQVTGPLFAPALSVSQSNAAENFAAFFNLPVEDAIDVDYLLAEYLLDDIGNGSSQGPWGLSATPPMMYDARAPAQLATPEDETGQQEEGPQDVSFADVAAGGTFAKDIAQVQQMIAQHAARAQATVEARTCSSLALPPVAVEAAASPAAAMKRPAPEAAVAATSGKRRPKSEAQVTRRRERNRILARHTRLRKKFFFEGLQKEVMDLQREHNALKIIVQSNLDQNVANEILKDSNIELPSVVMENCDTEDAADLDRQDFSLVKSLQFSQQCFVITDPSLQDNPIVYASEDFLTLTRYTREEILGRNCRFLQGPDTNAEKVEAMRKAISAGQDISVCIANYTADGEIFWNQLFVAALRDVEDN…
Aulacoseira_subarctica__Strain_CCAP_1002/5_CAMPEP_0172421012	MQQHPQQPQDEQLADLGDLFSDYFLHEYDETGNLGNYNAMLVAAAAAQQQQNHQQQQNHHQHHHQQQQQPQPFLLPTGRGIMTPYHFGALPLLPAAAAHKFAVAAATQQQQQQQQQRHPPPQDDVSQQQQYAQTQQYAPVAKKHRGGITLGDNTPYCSQEEQRQIIAAHTSALANAAAAAARQPDTPTTAATTTKLVLPVGHGIRIGGTLMNQAPDTSNNNNSNVPWETAQKPPQAAAVIVDVNQMETGLTHKEVEERRLRNREHAKRSRVRKKFILEALQQDVKDLQVENQRLLSIVQEHIPQKAQQIITECCGDENNNNDQQQQLTQPDLLLIQTVKRGQQNFVLTDPTLPDNPIVFASPGFLEFTGYSRDEVLGRNCRFLQGPGTDAQAVQILRKA…
Aulacoseira_subarctica__Strain_CCAP_1002/5_CAMPEP_0172421270	MNGTNPPPPIFVSASAVTSNQAGSKNYPGVSAATANALQAGKANLNFNLDEIFGDCFFTPDGETVFLSAEEQAYFVPSNEAQPATVASRLDPATNTFVPVPFAGGIATTHLDQPGAKASVMGPAAVQQQKPDKAKKGTVVPPPSHHLGFVTTAGLLDLGKKRRQRPGERSMSDKQKVERRERNREHAKRSRIRKKFLLESLQQSVALLKGENDKLRNAITFHLGDEKAGVLLNSKNINDQGLIAPSFADANKILDDPDFSFIKAIQTAQQNFVVTDPSLPDNPIVYATQGFLMLTGYTLDQVLGRNCRFLQGPETDPKAVEKIRNAIEEGVDKSVCLLNYRADGTTFWNQFFIAALRDASGNITNYVGIQCKVSDQYAANICKAEEENEDEENENDNAD…
Aulacoseira_subarctica__Strain_CCAP_1002/5_CAMPEP_0172423760	MHGHPENTFSQSSAASTMFLPQHTMQDVSAGIAHVRQGEEQGNTNFNLDEIFGDYFFRAENPVICAPLTEPASVWYTPNPSVGPVDATHLGLPAVMASVLVPSTTVDQQQMTSKSDRITKAVVAPCLRTDITTTADSLDSTKKRRRVQGERKMNDQQKVERRERNREHAKRSRIRKKFLLDSLQESAERLKRENEKLRNAIKTHLGDEKAADLLDPKTMLNQTFAPPTLPDAKAIQAAQQHFFVTDPSLPDNPIVYATQGFLNLTGYTLEQVLGRNCLFMQGPETDTDVAKEIRDAIEDGVALSVCLLNYRADGTKFWNHVSIAVLRDETGHITNYLVSSKTVNEQDLSAPAVTSSNTALEQVDTKKEAGSPSFNSLNIPIIPAFADNDKALNAPDFAF…
Aulacoseira_subarctica__Strain_CCAP_1002/5_CAMPEP_0172426906	MSEVPDGEGLAVGISTERAEVHQSNSNPPVIGMFLPQSDSVNYDLDLEDLFRDCYEFPGFEASSVMSSNEIPVLPETQKRKKPQDDDNDSSDGGGKNLTQAQRVERRERNREHAKRSRLRKKFLLESLQEQIYGLQDEISQLKDIIKREVPDKAERLLTELDGKVNNGGSYTPIPLPSGFGPVKTLIEPDFRLMSSLSNSQQNFAISDPSLPDNPIVYCSQGFLDLTGYTLSEVLGRNCRFLRGPGTDPSATEIIRKGIRDGVDTSVCLLNYKADGTPFWNQFFVAALRDAENNIVNYVGVQCEVSKAIVDSSQHQKVKAEAI
Chaetoceros__sp._Strain_UNC1202_CAMPEP_0197232500	LQYAMVNTNRRKLPAPGGAMGRDRKMSDQQKSERRERNREHAKRSRIRKKFLLESLQQSVSLLKEENDKLRGSIRQHLGDEEANELLTKENLAQAASSANGLIASNSKDANRVLDDPDFSFIKALQTAQQNFVVTDPSLPDNPIVYATQGFLNLTGYTLDQVLGRNCRFLQGPETDPKAVEKIRHSIEEGADMSVCLLNYRVDGTTFWNQFFIAALRDAAGNITNYVGVQCKVSDQYAANVCKKQEEEFSKSEDAVTGMTIPVTAPVPTPAAAEAAPAVTPASTTAPIAGPPAVAVAAPFVAVAAPIPAMAAPAVESVPASAPVMAAPGVEPKVETSG
Chaetoceros__sp._Strain_UNC1202_CAMPEP_0197240168	XFGPVKTLMEPDFRLMSALSGSQQNFAISDPSLPDNPIVYVSQGFLSLTGYSLDQVLGRNCRFLQGPGTDQSAVDIIRKGVREGVDTSVCLLNYKADGTPFWNQFFVAALRDAENNVVNFVGVQCEVSKAVVEKQMKEKAEASKVAEGDDSSIDKQM
Chaetoceros__sp._Strain_UNC1202_CAMPEP_0197240474	XIAPTPLAPAPLPMSIPPSFPGIVPTLTPAAPQQMIVHQHKRPRLEPNNSQTIQMSHVQNGHIMPAATLLTVPHSKLGRQKSQAQIDRRRERNRILARRTRLRKKFFFESLQKEVMELQRENVALKEIVRTSMDATQSKSILAACKAHEDLPDVVLEHCGDPSLLGSQDFNLMSSIRQSQQCFVITDPSLQDNPIVYASEDFLTLTGYSRDQVLGRNCRFLQGSETSSTKVAQIHKAVANGEDVSVTFVNYMADGTAFWNKLFIAALRDAQNNIVNYIGVSVKVAGPEPEDPEAGKILPGQLSAHGHEDSLTDMFDGPDDRDDSLDADAAVMAIEGAVEKAVAAAPNVVKTMPQNLS
Chaetoceros_affinis_CCMP160_GHAN01007177.1_4	SQAQIDRRRERNRILARRTRLRKKFFFESLQKEVTDLQKENFALKEIVRTRFEKKLSESTLKECKANEELPQVVLEHCGDPSALNKGDFNLMASVKQSQQSFVITDPSLQDNPI
Chaetoceros_cf._neogracile_Strain_RCC1993_CAMPEP_0119439906	MSTYDESQQQRAMNIQAPTFIHPLSQNTQHAVQTRGTPATLNLDDIFGDCFFTPEGDQIFLSENQNQNEEDDEDDEDHNDKIQTSGEAVVSTNASRQVDNNGSQQYVPVPYAGGITTTGLNQTGPTKASIMGPALNNGQDPQIIPMQQPPHQRHHLQYAMVNTSRKVPVQQSIGRDRKMSDQQKSERRERNREHAKRSRIRKKFLLESLQQSVTLLKEENDKLRGSIRTHLGDDQANELLKKDNLAHAAANANSLIASNSKDANKVLDDPDFSFIKALQTAQQNFVVTDPSLPDNPIVYATQGFLNLTGYTLDQVLGRNCRFLQGPETDPKAVEKIRKSIEDGADMSVCLLNYRVDGTTFWNQFFIAALRDAAGNITNYVGVQCKVSDQYAANVCKKQE…
Chaetoceros_cf._neogracile_Strain_RCC1993_CAMPEP_0119440116	MNNQNVQQPCFAPAKYDGDIDLSDIFAEYLNDGTDPLTTFSNYGGFQMQQNVPVAQAQPDTSLMLPTGGIRTAFHSGAMPNTAQPSFQNNVQQVQDQYQQMQTQMQQQSQQLQMQNQLQQQSQQLQMQAQQQQSQQLQLQQQQQQQQQQNEHIQKKARMSEQQNQFVQPQAAVPYNVSTSGSGITGRLGYNVQGGQLTMPLPSKDQHPSLSVGVASAQSGVQLPVGVGIRLGGIAPAANTGGAAAMNHSQHGGASSATGYAGNNDQLPLWAGHGTGGLSDHAVAERRQRNREHAKRSRVRKKFLLESLQADVRELQVENENLRMVVQSKIPQHAQQIISECCAKNPLFDDSNDNADKSGAKSGVELANSDFSLIQSLTSGQQNFVLSDPRLPDNPIVYA…
Chaetoceros_cf._neogracile_Strain_RCC1993_CAMPEP_0119440768	MSADQETNNGLASAPSSLSLPMFIASSETGSDPNERNLDLDDLFRDCYFGEFPMNVGIDDGNITQPPPPPAPLVSNNAFYIGPPETSSSSAFAPVPAVAATSATKRKAEDVLSREDTPSPVHSGEDGPDDKKTDSKALTDVQKVERRERNRKHAKRSRLRKKFLLESLQEQISGLQSEIDSLKEIIVRECPDKAESLLEAISGPKGKYTPLPMPSGFGPVKTLMEPDFRLMSALSGSQQNFAISDPSLPDNPIVYVSQGFLDLTGYTLDQVLGRNCRFLQGPGTDQSAVDIIRKGVREGVDTSVCLLNYKADGTPFWNQFFVAALRDAENNVVNFVGVQCEVSKAVVEKQMKENSKLNASGGIK
Chaetoceros_cf._neogracile_Strain_RCC1993_CAMPEP_0119462688	MTSVANVPFEMMLPCFMSASQSGADAGNFDHSGQQDMAFGGDDPLDFDLLAEYLLDDGPSALGTNFDFSSDSHTNEIEQPLSCIVSPELVSSTAPNAHLQGMFSIPVIHPHPNVGTPLYPPASFPGAPPAPGLLTSAPTTGIAPVAHHGPPQQMAVHQHKRQRFESGSNPQQPVQLSAHPAAPAPAVARTQQLPPQIRPPAPDEAPDSPTQSGKTGRQKSQAQVARRRERNRILARRTRLRKKFFFESLQKEVMELQKENMALKEVVRTNFDAEQAKPILDSCKVLENLPEAVLEHCGDPSNLGAQDFNLMTSIRQSQQCFIITDPSLQDNPIVYASGDFLTLTGYSRDEVLGRNCRFLQGTDTDQQKVDGIRKAIANGEDVSVVFVNYKADGTAFWNK…
Chaetoceros_debilis_Strain_MM31A-1_CAMPEP_0200881536	MPSQVFLPSFIPASAAAQPPNSKPEQHDDSLDFDLLAEYLLDGSDAGYSDNFIFDFGNESPPTSDDGNQTAEHLSIVSPDLQSTPMLSDPLFDNNILTSISTIQALPATTQVQTIPLTHLPTLPVPVTLPATLAPTPPVPMAAPPILTGIAPSPGAPKQLIVHQHKRQRIEPNIQQLPIQVASNAHLARIAAAGATPQIATIHKSGRQKSQAQIDRRRERNRILARRTRLRKKFFFESLQTEVMELQRENIALKDIVRSKMDATKSKTILAECKANETLPDVVLEHCGDPSALGSQDFNLMASIKASQQSFVITDPSLQDNPIVYASDGFLSLTGYNHDQVLGRNCRFLQGEESNQIKVASIRKAVTNGDDATTTFINYMADGTPFWNKLFVAALRDAQ…
Chaetoceros_debilis_Strain_MM31A-1_CAMPEP_0200883134	MTTNPEEQQPIQVQAPQFFAPLSQQTQHAVSTRGTPSTLNLDDIFGDCFFTPEGDTVFLSEGQQQDQLIGSDCNGNSNKVIVPSGESVVTNNASRPAVVAIAPGAAIGVSGAGVGAPTPLFGAAPVAGAASGVAPTPMAHATQFVPVPYAGGIATTGLDSTNAATRATTMGPAVQGKTEQKIMPIAAPPQQRHHLQYAMVNTARRKSAAGSAARDRKMSDQQKSERRERNREHAKRSRIRKKFLLESLQSSVALLKEENDKLRGSIRQNLGDEQANELLTKENLAQASSNNLIASNSRDANKVLDDPDFSFIKALQTAQQNFVVTDPSLPDNPIVYATQGFLNLTGYMLDQVLGRNCRFLQGPETDPKAVEKIRRSIEEGTDMSVCLLNYRVDGTTFWN…
Chaetoceros_debilis_Strain_MM31A-1_CAMPEP_0200889018	MSEAQPNTAPAPVAPAAADTIAPAAANGTTLASNPSTASLPMFIQSTGEDDLNGDNNLDLDDLFRDCYFGDFPMGGTDDLTAAIPMAAVSSSIAAAPVPTAAVATSISASAAAPPPAPPAPPAVAPLVSNSAFAAATTAPIVTTPCPAAPPPHPAVTTAISAAKRKAEEALGPDIVSSSSAGIHTSPGGMPSNVSTKALTDQQKVERRERNRKHAKRSRLRKKFLLESLQEQISGLQSEIESLKDIILAECPEKAEGLLESVSGPKGKFTPLPMPSGFGPVKTLMEPDFRLMSALSGSQQNFAISDPSLPDNPIVYVSQGFLQLTGYTLDQVLGRNCRFLQGPGTDQSAVDIIRKGVREGVDTSVCLLNYKADGTPFWNQFFVAALRDAENNVVNFVGV…
Chaetoceros_debilis_Strain_MM31A-1_CAMPEP_0200895502	MSALLTGRLFALDVCIAEVGKLDNVCASGHQSYIKSLKEINFTEVEGLLESASNPKEEIAPLPTPSGVDPVKTLTEKADVRLVSALSGSQQNLAISTQAYLKTPSSVSQVFLQLTGYTSDQVLGRNYRFLQDPGADESPVGFIRKGVRESAASSDCLLNYEADGSPSWNQIFIATLNAESNVISFVGGQCEISNVVAEKQMVEKKETESKIGD
Chaetoceros_debilis_Strain_MM31A-1_CAMPEP_0200896030	QQQQQQQIQQQEQIQQQQQQQQQQQEQFQQQQQQLQQQQQQQQQLLQQSFQQPLQKKPRVEGINQFQAFQQQAAVPSNVSTTGSGITGRLGLNLMGGQVTMPNASQPASAQGLAPGQVQLPIGVGIRVGGALPQTNIAAGNAMSQGQLGARAGAPVTGNTAQLPMWTGNATGGLSDQAMAERRQRNREHAKRSRVRKKFLLESLQAEVKDLQVENEGLRMIVQSKIPQHAQRIISECCTKNPLFDDSIGDETMGDEEKDKEAAEKKKTELVNSDFSLIKSLTSGQQNFVLSDPRLPDNPIVYASDGFYQLTGYTREQVLGRNCRFLQGPGTDPKAVDVIRTAVANGTDATTCLLNYKADGTPFWNQFFVAALRDSDNCIVNYVGVQCAVEPQDGASALE…
Chaetoceros_dichaeta_Strain_CCMP1751_CAMPEP_0198260346	MPSIAYPCFMPASKVKREPIHESGLPNSISTGDGDQFDFDLLAEYLLDEVTTNDLTQFDFRNETPPNTQGQTGVVSPDQSDIIFADPLADQLYLNSHLKTEDISESVAHVNQIVHGKTESGQALAPPPPTLQFKPNSAPLAPTPAIGPLAPAPPPLALKIPLTTPSLVPTPAPRLDPCRMVAHQHKRPRVDTQKPNGPVVPGNVQVVQRVIATPRGGRQKSQAQIDRRRERNRILARRTRLRKKFFFESLQKDVTDLQKENIALKEIVRTRISSKEAKPILDRCKAMEEIPSVVLEQCGDPSMMDRQDFNLYKAINKSQRCFVITDPSLQDNPIVYVSDDFLTLTGYTRSEVLGRNCRFLQGTETCRDKVAQIRKSTENGNDVSVTFVNYTADGTAFWN…
Chaetoceros_dichaeta_Strain_CCMP1751_CAMPEP_0198267116	MANYNGLNPTALNGAAMNGTQLQAPGALPMFVPGAEGGEDDNSVDLDDLFRDCYFGDFPVPTTATVDAPAPLVSNSEFYSQKQQSPNDITLKRKAEDQLDGVGESEIQSSVLPLALADTIPSSAAAAAAAAAKKDSSVMKPLTDQQKVERRERNRKHAKRSRLRKKFLLESLQEQINGLQSEIDALKDIIKKECPAKAEKLLESVSGPTGKFTPLPMPSGFGPVKTLMEPDFRLMSALSGSQQNFAISDPSLPDNPIVYVSQGFLDLTGYSLDQVLGRNCRFLQGPGTDQSAVDIIRKGLREGVDTSVCLLNYKADGTPFWNQFFVAALRDAENNVVNFVGVQCEVSKAVVEKQIAEQKARDDTGTTPPT
Chaetoceros_dichaeta_Strain_CCMP1751_CAMPEP_0198277810	IDLSDIFAEYFNEGGDDPLTTFSNPSICGDAAAAGQRIQQQQVQQISSILTPFETPQTVDPGHALGSSNVTLPRSQGIKTPYHAGLKHEPQIQSTSQVQQIPPQKKLKAGHMPSQYQQVVPTSTASQIMQAPGINPLGVTDRTQAPGINPLGVTDRMQAPGINPLGITEKMRGPGINQLGGAGKTQAQSINPLGVIGGQSGRGLSGRLGISMVGGQLSIPQTNSTGIRPVVSQDAKLPTVSSSIPLPVGRGIRVGNIIPHAPSSAPLNQARSITGSSTNIGATVTPAQNHYSSWMGLGGMGGGPGGMSEQAIAERRQRNREHAKRSRVRKKFMLESLQHEVRDLQKENNNLRMIIQGKIPQHAQKIIDECCQKSPLFDDGEEEQPQPDDSKKKVQLVKS…
Chaetoceros_neogracile_Strain_CCMP1317_CAMPEP_0200986364	MTTTTDNNNNNNNGTTTGESGNGGALPNSTSTTSFPMFIPSANIKEEDDENNLDLDDLFRDCYFGDFSVEAASAAAETGTSITGSGPPPPPPPPATATTTGAIAPLVSNKSFYTSQPKIAEASGVTTAKRKAEEALEQATADSGKPYIKKAATESSEGPPKALTAQQKVERRERNRKHAKRSRLRKKFLLESLQEQISGLQSEIDSLKHIIKKECPDKAEKLLESVNGPKANFTPLPMPSGFGPVKALMLPDFRLMSALSGSQQNFAISDPSLPDNPIVYVSQGFLDLTGYTLDQVLGRNCRFLQGPGTDQSAVDIIRKGVREGVDTSVCLLNYKADGTPFWNQFFVAALRDAENNVVNFVGVQCEVSKAVVEKQMAQIEEDTKQAEKE
Chaetoceros_neogracile_Strain_CCMP1317_CAMPEP_0200991294	MSNQNAFQQNGVQMPIFASVSQANNMSKFGDDIDLSDIFAEYLNDGDDPLTTFSNFSNYSMGLNQQQQQQQQQPQLQPQQQQQQQAMFNTILTSQDTSSQIGGTGNANMGTTVLPTGRGIKTAFHAGILPTMQSMPPQQQQQQQQTFQQQPPAKKLKLEDTHMSSLSQHTGKAVVPSNVSTAGSGITGRLGLNVFGGQISLPQKPPQSQLSAHGNVQLPIGVGIRVGGVTPQSSTAAAGGVPLNHMQWNSSGNKTNAQFGTWAGLSGSAPGAQQGISEQAMAERRQRNREHAKRSRVRKKFLLESLQADVSQLQSDNNGLRMLIQSKIPQHAQQIIDTCCMKSPLFGDDGQTGEDGKSKSDTELSKSDYTLIGNLTSGQQNFVLSDPRLPDNPIVFASE…
Chaetoceros_neogracile_Strain_CCMP1317_CAMPEP_0200992742	MNNQSQVKPNTIQAPTYSVATQAAVATRGTPSTLNLDDIFGDCFFTPEGDTVFLSEQPQQNQQQGSGTNDPNQQGISSNVLTSGEGGNVASFASRMVKNEYVPVAQAGGIVTTGLSTPGAVVTTMGPAASATNSTGVTTATGGGFTAQPSQQRHHMQFAIPNPSTMSGAGSKKRGGAAAISARERKMSDQQKSERRERNREHAKRSRIRKKILLESLQQSVSLLKEENDKLRNSIRHHLGDETANELLTKENLLNENENLLIASNSKDANKVLDDPDFSFIKALQTAQQNFVVTDPSLPDNPIVYATQGFLNLTGYALDQVLGRNCRFLQGPETDPKAVEKIRRAIEDGSDMSVCLLNYRVDGSTFWNQFFISALRDAAGNITNYVGVQCKVSDQYAAN…
Chaetoceros_neogracile_Strain_CCMP1317_CAMPEP_0200998654	MTSVMPSVSMPCFISATKASDPGTTSFEDALFNDGELDFDLLADYLLEDTDINNFGPAAQNVGSVTPDTSDMDFADPLADQTYQIYPPSTQGTTQNAAIKSDPIYNQNDVSMTQTENTYKVSNDFHPSPVGPIPGPVATVPPRLAVPTSFPSTAPPTNFDPQAMTVHQHKRPRLDTSATAATAAATTTFSSIQSNNRQLQLAAIKPMNQAIQVQATTSHPSHPGSVHIINQMMNHSSGRQKSQAQIDRRRERNRILARRTRLRKKFFFESLQKDVTDLQKENLALKEIVRKRFEESKGNEILVSCNANEKVPQVVLEQCGDPSLLTRQDFNLMSSVKDSQRAFVITDPSLQDNPIVYVSEGFLELSGFPSEQVLGRNCRFLQGPETSQKKVDEIRQGLS…
Chaetoceros_sp._Strain_GSL56_CAMPEP_0176481290	MPSDMMMPCFIPASQGGNDQGNYDCGGLQDLVAVGDDPLDFDLLAEYLLDDGASPPGATFDFSESPPNEAQPYSSIVSPDLASIEAPDMRLDGLFSIPVIQPNLSISQTNPPTAPHLYSNMPPYLASAPMMNASQSKSLHGVGYTQAMASSQKLSAQPQKRRKTESTQQLEQVHSQQHSVGQLLNPRRFANDAPAPSATSPFDKSGRQKSQAQIDRRRERNRILARRTRLRKKFFFESLQKEVMELQKENLALKEIVSTRMDPETSFAILRDCDAQDKLPDAVIEQCGDPRILGVQDFNLMKSIRHSQKSFVITDPSLQDNPIVYASDGFLELTGYSRDQVLGRNCRFLQGPETNSAKVAKISKAVANGEDVSVTFVNYTADGTAFWNKLFIAALRDAQ…
Chaetoceros_sp._Strain_GSL56_CAMPEP_0176492626	MTITNGSDQQNNETRHPMYYTAGTGLVSAPSSSSLPMFISSSDPEADANDNNIDLDELFRDCYYADLSTNGAPSPTPSDTMPKPPPPPPPAPLVSNSELYSPTKTSAAVRKRKAEEPPDDSDDESDKAAVSSPTSGAASSKKSDSRALTDQQKVERRERNRKHAKRSRLRKKFLLESLQEQINGLQSEIESLKDIIRRECPDKADNLLEGVSGPQGKFTPLPMPSGFGPVKTLMEPDFRLMSALSGSQQNFAISDPSLPDNPIVYCSQGFLDLTGYTLDQVLGRNCRFLQGPGTDQSAVDIIRKGVREGVDTSVCLLNYKADGTPFWNQFFVAALRDAENNVVNFVGVQCEVSKAVVEKQLKEKAEADSKVNARSGK
Chaetoceros_sp._Strain_GSL56_CAMPEP_0176493390	MNNQGETTQPQAQYIQPPTFVAPLSQQSQHAIQTRGNPSTLNLDDIFGDCFFTPEGDQIFLSENEVPIQASGETVISSNASKPILQNGTEQYVPVPNAGGIETTGLNVAGPVRATTMGPVNDNGQERKIVPMIAPPQQKHHLQYAIVSAADKKSTAAAPTSAAHGTMRDRKMSDQQKSERRERNREHAKRSRIRKKFLLESLQQSVSLLKEENDKLKSSIRSHLGDKEADELLKKENLANVAASESSNTLIATNSKDANKVLDDPDFSFIKALQTAQQNFVVTDPSLPDNPIVYATQGFLNLTGYSLDQVLGRNCRFLQGPETDPKAVEKIRRSIEEGTDMSVCLLNYRVDGTTFWNQFFIAALRDAAGNITNYVGVQCKVSDQYAANVCKRQEEEFAR…
Chaetoceros_sp._Strain_GSL56_CAMPEP_0176497164	MNNQNVQQPIFAPSTQGNKFDVDIDLSDIFAEYLNDTADPLATFSAYGNFQWQQTTPSVPHATSKNGSSVVLPTGGIRTAFHASQIPQQPSQHGLYSQNDIQYNISSNTSNNNNNNVVMRQSNFENVPTQTNPQYHGESSQTLIMPASLGGDNIHAHKKPKLDTGIKEQSNNLHMXMQQRQTAVPANLSTSGITGRLGYSVQGGQLMMPMSQTTSQSTQLVNLAPAPPSSLQLPIGVGIRVGGISNMNQRVEQNMTFASNTGIPSQSATYPMWTGNNDTAELTEQAVAERRQRNREHAKRSRVRKKFLLESLQAEVSELQAENERLRMLVQSKIPLHAQEIISECCVKNPLFDDESLRTKNAGDKKCVELANSDYTLIKSLTSGQQNFVLSDPRLPDNP…
Chaetoceros-affinis-CCMP159_CAMPEP_0187010302	MSNQNVFEQNGVQRPMFAPVSQSSKGKFDEVDLSDIFAEYLNDGDDPLTTFSNFSNFTSMGFPQQQNQAQQQQQQQQTQTALNSLLTNNQSGNTQGVVPQVTGNNVMGAITLPTGRGIKTAFHSGVSAPTVQQQEPLMKKQKLQTAPYTHPGQAVVPANVSTSGAGITGRLGLNLSGGQVTVPQKPPQSKPVTQNNIQLPIGVGIRVGGVHPQSAGAMPLNHMQWSATGDRNNLNGQYNSWSGLNGTVGGTGGISEQAMAERRQRNREHAKRSRVRKKFLLESLQTEVRQLQEENKNLRMLIQQKIPQHAQQIIDECCIKSPLFGDDGTGNDREKNEVELTKSDYSLIENLTSGQQNFVLSDPRLPDNPIVFASEGFYQLTGYTREQVLGRNCRFLQGP…
Chaetoceros-affinis-CCMP159_CAMPEP_0187011416	MNSSAPAPPQSSSNMNANNTNVDPNTIQAPTFSAAPLSSQAQHALSTRGTPATLNLDDIFGDCFFTPEGDTVFLSEQQPQANESVASTLTPSAAGGGSTVAAGFGEAMNIQISGETTVANVASRPVMVDDGSGQQQQQYVPVAQGGGISTTGLDQKGHHVKVTTMGPATVSTASSATTTTNSLSQQQKFMQPPQQRHHLQFATTIPPTTMGGAKKRGGASARERKMSDQQKSERRERNREHAKRSRIRKKILLESLQQSVALLKEENDKLRSSIRQHLGDATADELLTKENLANANVNSLIASNSKDANKVLDDPDFSFIKALQTAQQNFVVTDPSLPDNPIVYATQGFLNLTGYALDQVLGRNCRFLQGPETDPKAVEKIRRSIEEGSDMSVCLLNYR…
Chaetoceros-affinis-CCMP159_CAMPEP_0187022230	XQNGDEDDEANNLDLDDLFRDCYFGDFAVPVTGAELGATALPIATTAAPAPAPASVNINANTNANVPTNPPPPPPPPVIAPLVPNNTFYSNQQVSVATTTTASASGVPVATPSSAVTTAKRKAEEALDQATGTISSSNKKSNGTSTTATSTASLNTNGGAAKELTDQQKVERRERNRKHAKRSRLRKKFLLESLQEQINGLQSEIESLKEIIQRECPDKAESLLSSIYNNAGGSGTGPQGSASGNFTPLPMPSGFGPVKALMEPDFRLMSALSGSQQNFAISDPSLPDNPIVYVSQGFLELTGYTLDQVLGRNCRFLQGPGTDQSAVDIIRKGVREGVDTSVCLLNYKADGTPFWNQFFVAALRDAENNVVNFVGVQCEVSKAVVEKQMKQKEAEAEKA…
Chaetoceros-affinis-CCMP159_CAMPEP_0187031746	MPSAVSIPIFISATKASEIATHDDCYGLFNDGELDFDLLADYLLEEANDFEAPLVGEQPSTTTNAVTPDVPDADFADPLADATFAINFPSGSQQTAIPKQAQNVPISSSTAVHNQAAVATAPPPTAGMSAPPHTLASIPQAQVQTQMPAPTPAPTPASQPTNTQTMVVHQHKRQRVETVATTNNINVPMQPTLIKPMSRAPPPPSAPIPPTIPNPTSLPVVHPGHPAMNIVNNQIIEPRSGRQKSQAQIDRRRERNRILARRTRLRKKFFFESLQKEVMDLQKENLVLKEIVKSHVEEKNAETILKDCKANQELPQVVLEHCGDPSALARRDFNLIASIKQSQESFVITDPSLQDNPIVYSSDGFLALTGYTREQVLGRNCRFLQGVDTDPSKVAEVRK…
Chaetoceros-curvisetus_CAMPEP_0187047574	DENDNNLDLDDLFRDCYFGDFPINTIEGDGIAATTTQQAPPAPLVPNNTFGAANATPATVPSSNVATVPMPVAPTAASDAVSTAISNAKRKAEEALGPDPTPTPAAVISSSPSPFAALIKSQSASMPAHVTSGGTVAGVVPGGGSAKTLTDQQKVERRERNRKHAKRSRLRKKFLLESLQEQISGLQSEIESLKDVIRKECPDKAEELLEGVSGPKGKFTPLPMPSGFGPVKTLMEPDFRLMSALSGSQQNFAISDPSLPDNPIVYVSQGFLDLTGYTLDQVLGRNCRFLQGPGTDQSAVDIIRKGVREGVDTSVCLLNYKADGTPFWNQFFVAALRDAENNVVNFVGVQCEVSKAVVEKQIKEKKEADAAAAAADGK
Chaetoceros-curvisetus_CAMPEP_0187050260	XGFLNLTGYTLDQVLGRNCRFLQGPETDPKAVEKIRRSIEEGTDMSVCLLNYRVDGTTFWNQFFIAALRDAGGNITNYVGVQCKVSDQYAANVCKKQEEEFAKFEEEGNVATVTATPATAAPTPVAVPAPSINVPMGATTVTAGVPATTTTSAVPTVTTTAAVSPAAPLPNITTVTTAVVPPPTMNNSESNVKMESAPAPGNQ
Chaetoceros-curvisetus_CAMPEP_0187051038	EPPKQLIVHQHKRPRLGNTAPNAQQSVPLAHTQVQVQHHTQVPSQNLPLAQITSNAIAPAGIPQRTNGRQKSQAQIDRRRERNRILARRTRLRKKFFFESLQKEVMELQRENLSLKEIVKSRLDPTTSKTILAECKANEELPDVVLEHCGDPSALGTKDFNLMSSIKASQQSFVITDPSLQDNPIVYASDDFLTLTGYNRDQVLGRNCRFLQGEETSQAKVAQIRKAILAGDDVSVTFINYMADGTAFWNKLFIAALRDAQNNIVNYIGVTVKVAGPEEGDTEAGKVLPGQAAIDGAQQEKRNFASTTSGAESPVDVDAAIMAIEGAVEKAVAAAPNVVKTVNKTLP
Chaetoceros-curvisetus_CAMPEP_0187062170	XQQQQQQQQYQQQFQQPVQKKARVDEAQTFQVLQQQAQAAVPTNVSTTGSGITGRLGLNVIGGQVSMPSKAPQPAPAQSLAPAPGKLQLPIGHGIRVGAAVPQASMSASGGITMSQLQQGASRSVAPVAGMAHNMPMWTGNATGGLSDQAMAERRQRNREHAKRSRVRKKFLLESLQAEVKELQTENEGLRMISSPKYRNMHKKIISECCAKNPLFDDQNEDEAVKNAKKDAAAEKKKVQLVNSDFSLIKSLTSGQQNFVLSDPRLPDNPIVYASDGFYQLTGYTREQVLGRNCRFLQGPGTDPKAVDMIRTAVANGTDATACLLNYKADGTPFWNQFFVAALRDSDNCIVNYVGVQCAVDPQAGASALEDKVNSILPLAHKQSDE
Corethron_hystrix_Strain_308_CAMPEP_0113309780	MFQHTGIQHPVFAPKTDQPCDDLDLNDIFADYFINELYDDDDGDPPLHPGFESGVVLPTGQGVQTAFHAQTLPQTPSTANPIIAAAAVPSAPSTGPIVALAPASSSSVIANPLATYATYPPANPLVGVVSVRASEVPQQKAKAEPRPQPQSQSQSQSHASPPPPQPQPKKQKIGAGTTGRGRGRGRGRGRPSAVGSGVRLPFPVHNHNHNPLPPLASTAATPTPVVPAPVPSSMPPTPTPLPLTLTSNPALPPLAAVPSNLASKTGGISGRLGFTLVGGQVNVPSTLPKVQPTAAAPPPASSNASPLPKSQLPVGVGIKLGFRPEITALNHAAAPPNSQIHHTSWDKMQLPGPAATAAAGQARTLPPTNPLWGRPGALHYPPLANLSEAAVAERRQRNR…
Corethron_hystrix_Strain_308_CAMPEP_0113312490	MSGHQQPGVSQQPTNPNAINLDEIFGDCFFTPEGDTVILDGNDDDATAAVPVVSIQPTPTVSIQPTPTTSALSSSLPPSSLPSSATSLAHTDHSGRAFHPGAIINVSNAPIISRETQPATVAHRPDGMSVPLAVPAHTPGGVPTAASVVKAVAPPPRHHMSFVTGPVVKRGGRGGGGPGGRGSDRKMSEKQKVERRERNREHAKRSRIRKKFLLESLQQSVSLLKEENEKLRQAVRGGLGEAEAEHLFAAETERIANGESNPGGSIVTGGDGSDANKVLDDPDFSFIKALQTAQQNFVVTDPSLPDNPIVYATQGFLSLTGYTLDQVLGRNCRFLQGPDTDPKAVEKIRKAIEEGSDMSVCLLNYRVDGTTFWNQFFIAALRDAGGSITNYVGVQCKVS…
Corethron_hystrix_Strain_308_CAMPEP_0113313340	MDVGPSPQVVNPSGITVPRFAPASAKHPEGTENSSGMKRNVSFPNFDLQNIYDVNVDFDLLADYLLDDIPSTMPGNTVDFPTGNEGTVPNVTCVSDGSSSGEEPDVTPDQTDVKPAAGADIASKAVTVGYLSQSEKIQQMVAAAAAHQNLANLQQMIQQQKSQNEKTDTTLNTTLGVPPLMGSASSPAIVGVGPVVSTACVIPTQDVSLNTNDKKRKAIEEAGGTRQKSKSQAQIDRRRERNRILARRTRLRKKYFFESLQKDVADLQKMNTFLRDVVRTRMSSQADAILKDCHRELPSVVTEACIDGDNMDSKDFTLMKSLQNSQQCFIITDPSLQDNPVVYASEAFIEITGYSRDEILGRNCRFLQGPHTNKAKVAKIKRGIEAGEDVSACIINYAA…
Corethron_hystrix_Strain_308_CAMPEP_0113322542	XPDDVFSASSSVPSASSSAADASSSSKALTQEQRIERRERNREHAKRSRLRKKFLLESLQDQISGLDAEIEELRAIVRQELPDRAERLLEGVGGRGGPRYKPLPMPSGFGPVKTLMEPDYRLMSALSGSQQNFSIADPSLPDNPIVYVSQGFLDLTGYTLDRVLGRNCRFLQGPGTDQNAVDIIRKGIREGIDTSVCLLNYKADGTPFWNQFFVAALRDAENNVVNFVGVQCEVSKARVESELKKSQRGG
Corethron_hystrix_Strain_308_CAMPEP_0113330794	MSGHQQPGVSQQPTNPNAINLDEIFGDCFFTPEGDTVILDGNDDDATAAVPVVSIQPTPTVSIQPTPTTSALSSSLPPSSLPSSATSLAHTDHSGRAFHPGAIINVSNAPIISRETQPATVAHRPDGMSVPLAVPAHTPGGVPTAASVVKAVAPPPRHHMSFVTGPVVKRGGRGGGGPGGRGSDRKMSEKQKVERSRLQKGVRPPLRQDRLGQLGVAFRFPLSGEKRLLKGLEEKFLADAGTLSMFTVAFSAENKKKRYXGGDLCEVHRGEMACAYKKMSYYAHLFVNTRHFTPMHLTQITTLYLLFLILCRERNREHAKRSRIRKKFLLESLQQSVSLLKEENEKLRQAVRGGLGEAEAEHLFAAETERIANGESNPGGSIVTGGDGSDANKVLDDPD…
Corethron_pennatum_Strain_L29A3_CAMPEP_0200311130	MFQASGITHPVFAPKSDQQSEELDLNDIFADYFINELYDAPDEPCMQPTHPASFVSNALNNNTSSVRPATHVNSSQDTNPVVKGADVTLPTGRGVQTMFHAQALQSTPSTANPIISQLQKKQKIESFQSQGNQIQPQSAISANVLSLVQHVQNPLQQYPLKISSNNSVASVPPNVVNSKSGISGRLGFSIIGGQLAMPSALPKIHPAPSPDLNISAHSVGDGKNMGNLPKSQLPVGVGIRLGNLGGALGGNALLAAGGSEMTSINHPSSGHPIMRSQIQHAAWNNMQPAGQVSGSIAMQLNSPLWGRAPLPNQNMSEQAVAERRQRNREHAKRSRVRKKFMLESLQEEVNKLQKVNTDLRMMVLEKLPDVAHAVIEECCAKSPLFSNDCPAPKQKIELT…
Corethron_pennatum_Strain_L29A3_CAMPEP_0200323798	MAKVGSEIGDLFQDCFFGTGTNAFGSPAEVSRDFATDIALGSAAAAAASNPALVEFLAQNPPEATTTGGTKRKAAGSDGEAPPDAIQSSTDGNGEAPTPEAAAPGDRDLTKKQRTERRERNREHAKRSRLRKKFLLESLQDQISGLEEELEELRGIIRKELPERSLELLAGAGAAVGGDGGNGQTFKPLPMPSGFGGPMKTLMEPDNRLMAALSGSRQNFSVSDPSLPDNPIIYVSQGFLDLTGYKLDQVLGRNCRLLQGPGTDQGAVEMIRKGVDEGVDTSVCLLNYKADGTPFWNQFFIAALRDAENNIVNFVGVQCEVSKARVESELKGRKSSGLTNGKA
Corethron_pennatum_Strain_L29A3_CAMPEP_0200327076	MNVGSSPQVVNPNVITIPRFTAASTRLKDSKQLEAGENGAGMKRDASFPTFDVQNILDVNVDFDLLADYLLDDTTSSPSGNNAEFLPGDDTKTPQATCVSSESSSSGDGDEQEHADAKAPVGSGNTPNPVTVGFMSQSEQIQHMMAAAAAHQNLANLQQMIQQQKKSSQPEKTVTGANVTFPAVSSIPGSASAPTKIASTPGLLTSATGISLISALDMDANGKKRKAMEDAGGVRQKAKSQAQIDRRRERNRILARRTRLRKKYFFESLQKDVTDLQRTNTFLKDVVRTQMSSVADSILKDCQCELPSVVTDVCMDIDNMDGKDLSLMKSLQTSQQCFIITDPSLQDNPIVYASDGFIEVTGYARDEILGRNCRFLQGPETNKAKVAKIKKAIEAGEDV…
Corethron_pennatum_Strain_L29A3_CAMPEP_0200327942	GVVAGEAGTGNKVLDDPDFSFIKALQTAQQNFVVTDPSLPDNPIVYATQGFLSLTGYTLDQVLGRNCRFLQGPDTDPRAVEKIRKAIEEGSDMSVCLLNYRVDGTTFWNQFFIAALRDAGGGITNYVGVQCKVSDKYAANVCRRQEEADRRAARGDKGEDNDDGDGGGDYDDDGDD
Corethron_pennatum_Strain_L29A3_CAMPEP_0200357970	MNETPMDNSKALTMFANDNSSAQPASGNIDIDDLFQDCFFGGDNPLETPEFASPDVVSSDFGTDASLGQAATAAAVIANPSLQPYLSPQLTAGMKRSQPTATPASATSTQLEPVLSAATSSVPMEEDAPVASNNKALTTEQRIERRERNREHAKRSRLRKKFLLESLQDQISGLEAEIDELKNLIKREVPDRAGALLQSVGAAGKGSQKYKPLPMPSGFGPVKTLMEPDYRLMSALSGSQQNFSISDPSLPDNPIVYVSQGFLDLTGYSLDQVLGRNCRFLQGPGTDQNAVDIIRKGIREGMDTSVCLLNYKADGTPFWNQFFVAALRDAENNVVNFVGVQCEVSKARVESELKSRAAAGANA
Coscinodiscus_wailesii_Strain_CCMP2513_CAMPEP_0172500390	MSTAVSSMYSITIPKFASASTEQNANSKPNGCSSEWAAVMSSGLGQAEGSGDPLDFDLLAEYLLEDFTMNPTSTAYSFTQNHNECKDSEPYKDDQAQHHQEQSVTIPNQDQFAAAAASFADPLADAAMMLRQTGAPAPSGDLASDLVAQSHQIAAAGGQPAHQIPSASGQHPVPAPVAVPAPIPAPAPITAPAPLEHPGLTVPPSAAPVPTPMITVPDAASSSTPGEMTVHRHPPPATEGANKRPYPETTAPTAASLLPATLPNLTPGAAPTTQPSGKRQKSQAQIDRRRERNRILARRTRLRKKFFFESLQKEVIELQRENAVLKEIVKSKLDDDVAQKVLEDCHAGELPSVVTESCGEDGNIDLDQQDFNLVCSIKKSQQCFVITDPSLHDNPIVYA…
Coscinodiscus_wailesii_Strain_CCMP2513_CAMPEP_0172510458	PQKAYHLNFAIPGMDVGAARKDATIKAEEAKKRRGRGEGRKMSEQQKNERRERNREHAKRSRIRKKFLLESLQQSVTLLKEENEKLRNSIKTHLGDETAAELLSSENLEEQAGLIASSSSDANKLLDDPDFSFIKALQTAQQNFVVTDPSLPDNPIVYATQGFLNLTGYTLDQVLGRNCRFLQGPETDPKAVEKIRKAIEDGTDMSVCLLNYRVDGTTFWNQFFIAALRDAAGNITNYVGVQCKVSDQYAATVCKKQEEMENKESGGEIDGDVHRDRSGGEEE
Coscinodiscus_wailesii_Strain_CCMP2513_CAMPEP_0172516792	RKGFLHEDTSPHTLNENQAIHISCPQLSHILPKSALDSKINDSMKDFSDSTMVADAKWGTAPSALDDADIYGGCFFTPEGTVVVMDNGTNPLPFPTFRDTNKMLPDSSRILVDERPVPVNWVDRVVTTNLENPLKAVTAMGGGSRSVDEAPLTNFLQKANNLNFAIGAMDDGVAKKDMTVNVERTKKRRRGEGQKMSEQQINIRRERNRKHARNSRCRKKALIGSLEESVALLREENEKLRNSIKTHLGDETAAKLLSPQKIEEREESTTSNSSNDNKIPAGPLSPENLEERAELIKSSLCNGNKILDYSNIFLIRAGRIPQQSFIVTDSSHPDNHIVYATQGFLNLTGYSIDQVIGRNCRFLQGPKTDPKALEQIRKGLADGIDMSVCLLNYRADGTT…
Coscinodiscus_wailesii_Strain_CCMP2513_CAMPEP_0172517764	MEQTGNGVAQPQAAAPNQFPNQTDIATEGKPAIVTTPVVVNNPIAAPAPAPATTSLPQRIVQPVETSTAAAAPEHATTTAVAVPPGNVSTTAAVVPHADVSATVSAAAPGNGSSATAAVTASQNGGTAEETSAPESALHMFASNEDAGNQSIDLDDLFSECYFGDFPVPPFSQPNHVYNSAASNQTPSAPMLDSQVVKVNNPMESLPQKRKLDNTNEMETSTTMPVPVTSDSAVTVTAANVPPVTMQSSSAAAAPAASAPALKTTPMQLPTSILSALSSGASNAMTMNSTVNKKLTDQQKLERRERNREHAKRSRLRKKFLLESLQGQIHGLQSEIDTLKNIIKRELPDKAELLLATLDSNQGRFTPLPMPSGFGPVKTLMEPDFRLMSSLSNSQQNFA…
Craspedostauros_australis_Strain_CCMP3328_CAMPEP_0198112554	MSGVPTFSTDLSGPTAAAVAQRGTPATLNLDDIFGDVMFTPDGDTVFMSEDGAQGTVLNSGEREVSTMARKRNGDRYIAVQRGGGVQTTQLLDNTKPSLVMGTADGAGPTQSVPFRKAPQQRHHLQYAMPKKKSSRSSDRKMSEAQKNERRERNREHAKRSRIRKKFLLESLQQSVALLKEENEKLRGSIRDHLGDGEAQRLLAKPGTEAAPDAALIAASQGAANKVLDDPDFSFIKALQTAQQNFVVTDPSLPDNPIVYASQGFLNLTGYSLDQILGRNCRFLQGPETDPKAVERIRHAIEQGNDLSVCLLNYRVDGTTFWNQFFIAALRDAAGNITNFVGVQCKVSDQYAASVTKQQEEEEDQPE
Craspedostauros_australis_Strain_CCMP3328_CAMPEP_0198115238	XFESLQKEVMDLQRENAALKGIVRDKLKGEDGQRILDECDAAERMPPAVLEACGEQARDMAQQDFNLVRSIQGSQHSFVITDPSLQDNPIVFASDDFLTITGYSRDDVLGRNCRFLQGTETSQEKLKEISKGLASGEDVTITLINYMADGTPFWNKLFIAALRDAQNNIVNYIGVIVKVASPEPSDPEHGKLLPGEQPVSNDSMDFGDLGDAEDAPADDGSAAGAGHLPAQAPATTMGGGLGAPQLDDVAIGNSGEEIVAKTATGEAGERWLSEMKKRSKTAQSSPRRARRATKTTNEQINERTRQDSKIRQDETQANHHCLKGAPKRGGSEYAPYTKPKSYTLYIRVIAFDNSVIHESKXNALYSDVAWCPSSCEGAAALCXWHPMFCACFRLRAFLL…
Craspedostauros_australis_Strain_CCMP3328_CAMPEP_0198131192	XAKRSRLRKKFLLESLQEQIHGLQEQMEKLKAALKREIPHKASAIIEDVCGNKDKYTPLPMPSGFGPVKTLMEPDFRLMSALSGSQQNFAISDPTLPDNPIVYVSQGFLMLTGYTLDQVLGRNCRFLQGPGTDQSAVDVIRKGINEGVDTSVCLLNYKADGTPFWNQFFVAALRDAENNVVNYVGVQCEVSKAVVEKHMGDKKKRGP
Cyclophora_tenuis_Strain_ECT3854_CAMPEP_0116540732	MQNGVQQPMFXVSQGNQLGEDIDLNEIFADYFISEFDDPLNAYTSSMANYGGGAVAIALAQKQQQVDASAAVPSTTTSSATTATTTTTTTTVPAPLPTGGIKTAFHSGNIVAQQNISVEPAAKKLKETVLTSGPPLAPPQPPQPVVPTTQHVGATAASSSGKXGFSVVGGQVAIPAKPAPPQPQPVSSISAAGTGVALPVGVGIRLGGVGGVAPTTAQASARPGAGTHFAMWGGQAPAAMSEQAVAERRQRNREHAKRSRVRKKFMLESLQEQVRSLQKENVELRMLIQQKIPQHSQQIIAECCSKNPLFSDPNDKGAPAPVEQPPKKETSLVRSDFSLIESLTSGQQNFVLSDPRLPDNPIVYASPGFYVLTGYTQDQVLGRNCRFLQGPGTDPRSVD…
Cyclophora_tenuis_Strain_ECT3854_CAMPEP_0116552044	MSNPSAPLFAPTEPGLSDGATAAVAQRGTPATLNLDDIFGDVLFTPDGDTVFMSDMQQGAEAGAVVQSGEGEKVATHASRIDGDKVVPVANAGGIETTNLLRPGQKSLIMGAAGGAPSQPVPFKHAPQQRHHLQYAAPEMMAAMKKRSRPSGKSSERKMSEQQKVERRERNREHAKRSRIRKKFLLESLQQSVTLLKEENEKLRQSIRSHLGAAEADELLGKSLSKAGEAGLIANSPVDANKVLDDPDFSFIKALQTAQQNFVVTDPSLPDNPIVYATQGFLNLTGYTLDQVLGRNCRFLQGPETDPKAVEKIRKSIEEGTDMSVCLLNYRVDGTTFWNQFFIAALRDASGNITNYVGVQCKVSDQYAANVCKKQEAEEGEDMETNKAHTLKNGDDINN…
Cyclophora_tenuis_Strain_ECT3854_CAMPEP_0116573368	XLAEYLLDDGTTTGPSPAGIPQFDFTAESPPVSGVVSPEQSDDGFPPISDASPANGRVATAPQAPVSSPPPSQVARTAPTLVHPGLPLPPAPAPFPALPAPIAAAPAVVVHQHSGMVPNVTNSKRRRVNTAPVLPVPGALPGAFVNGHHLVAHAVPGRVRQKSQAQIDRRRERNRILARRTRLRKKFFFESLQKEVTDLQRENAILKDLARKKLEPDTAKKLLDGCKAMEQLPSAVLEACGDANADLDQQDFNLVQSIQKSQQCFVITDPSLQDNPIVYASDAFHTLTGYKREEVLGRNCRFLQGTETSPQKVEQIRKAVSNGEDVSVTIINYTASGTAFWNKLFVAALRDAQNNIVNFIGVIVKVAAPDPDDPEANKRLPVDQAASTNSEEEQASSKD…
Cyclophora_tenuis_Strain_ECT3854_CAMPEP_0116576410	MQNGVQQPMFXVSQGNQLGEDIDLNEIFADYFISEFDDPLNAYTSSMANYGGGAVAIALAQKQQQVDASAAVPSTTTSSATTATTTTTTTTVPAPLPTGGIKTAFHSGNIVAQQNISVEPAAKKKVKGNCPYLRSSTGTSATPATCSSNDSTRWSHRASSSIGFSVVGGQVAIPAKPAPPQPQPVSSISAAGTGVALPVGVGIRLGGVGGVAPTTAQASARPGAGTHFAMWGGQAPAAMSEQAVAERRQRNREHAKRSRVRKKFMLESLQEQVRSLQKENVELRMLIQQKIPQHSQQIIAECCSKNPLFSDPNDKGAPAPVEQPPKKETSLVRSDFSLIESLTSGQQNFVLSDPRLPDNPIVYASPGFYVLTGYTQDQVLGRNCRFLQGPGTDPRSVDI…
Cyclotella_cryptica_CCMP332_g18270.t1	MSNNQGQPQNPNIRPPQFVPANVPGMSASASAAVQTRGTPSTLNLDDIFGDCFFTPEGEAIFLSENPQLQQQVQQQQQQQQQQQMQMNQQQQYSQAGLLPSGEAVPTQNASRFANTGFTPVPQAGGIVTTGLHKPKAPATVMANLPSGGNGSQQQLPSQVPFAQAPQRPHHLQYAFVQAGGHGQAPPTNSAGSKRGAASASGSKDGAKTADRSKLVKERNREHAKRSRIRKKFLLESLQQSVSLLKEENDKLKGAIRSHLGDEEADALLNKQADANAGGGLIAASSRDANKVLDDPDFSFIKALQTAQQNFVVTDPSLPDNPIVYATQGFLNLTGYTLDQVLGRNCRFLQGPETDPKAVEKIRNAIEEGSDMSVCLLNYRVDGTTFWNQFFIAALRDAG…
Cyclotella_cryptica_CCMP332_g20747.t1	RCSIAQALFNSGMQLPLFAAASQQQSSGADDVDFQELFREYFNDDNGESFAYSNSMAQLQAQAMANSLPTGQGIRTAWHSESGGSQQPLKRTRIEENLYLPTGGLSSYANDFSAGIANSGLGVGGLPNHFSVSGSGSIGGSGLGQVQLQQQAILSGAASNLAMGMGGMSANMMGSSTGGRLMPVSNINYALGSKNAVSQMSFGAPVQGVDKEALEQQMTAERRLRNREHAKRSRVRKKFMLESLQEQVKKLQEENSDLRLLIQKHIPDNALKIIDDCCTSSPLFGIPELGGGGPADGEDKKSDTTALIKTDFSLIESLTSGQQNFVLSDPRLPDNPIVFATPGFYQLTGYTREQVLGRNCRFLQGPGTDPKAVDVIRSAIAKGNDATVCLLNYKADGTP…
Cyclotella_cryptica_CCMP332_g23579.t1	ALPTKRSAETAGISQNNTLTPLETTSSSVNAAASKVAAASLTESQKIERRERNREHAKRSRLRKKFLLESLQEQIEGLQSEITTLKDIIRRELPEKATELLKGLEGDADGPPGQPKKGDYAPLPMPSGFGPVKTLMEPDYRLMSALSGSQQNFAISDPSLPDNPIVYVSQGFLDLTGYTLDQVLGRNCRFLQGPGTDQAAVDVIRKGVREGVDTSVCLLNYKADGSPFWNQFFVAALRDAENNVVNFVGVQCEVSKAVVDKHISEGKTPAPSSS
Cyclotella_cryptica_CCMP332_g7346.t1	MDSTLDFDLLAEYLLEDGGGIFDLIPETSSPPSETEQQREVGLVTPHSIDPTFADPLADAAEQLRQGGSLPTSGDLAKELAQVQTMIARQQQMNQAPQQPQAVVKAAAPLPAYMQLPKPAQATLPGQRTTRPPVANVMNMPPVKRSRVENGAPPHGQSIMPSFSAKSSLGMPMPQASNLSFPRSYSSNPSATAASSKAAAERAKGQAQIDRRRERNRILARRTRLRKKFFFESLQKDVADLQRENAALKSIIRSRLKPDDAHAILSTCNANEKLPSIIHDPEMNEDGFTGDKAVKHLDKEDFNLIQSIQNSQQCFIITDPSLHDNPIVYASNDFLDLTGYSQEEVLGRNCRFLQGTETSQEKVAAIRKAISVGEDCNVTLVNYTSGGTPFWNSLFIAAL…
Cyclotella_meneghiniana_Strain_CCMP_338_CAMPEP_0172269032	MSNTSNGSGKELPEPASVGGASQSNASTAAHPSAMNLFAPDPNADPESLQNALDLDELFHDCYFGDFPVPEDVTSDQTALPTNKRSAETAGIASKPVEKASVKPPSFSTSTSKAAAAALTESQKIERRERNREHAKRSRLRKKFLLESLQEQIEGLQSEIGTLKDIIRRELPDKADDLLKDLDGGDIDGPPGQPKKGNYAPLPMPSGFGPVKTLMEPDYRLMSALSGSQQNFAISDPSLPDNPIVYVSQGFLDLTGYSLDQVLGRNCRFLQGPGTDQAAVDVIRKGVKEGVDTSVCLLNYKADGSPFWNQFFVAALRDSENNVVNFVGVQCEVSKAVVDKHISEGKTPILS
Cyclotella_meneghiniana_Strain_CCMP_338_CAMPEP_0172272172	MSNNGLFNGMQMPLFTAANQQQANVDDVDFQDLFREYFNEEPMAQLQAQAQAAMNTSLPTGTGIRTAFHGGAEQHQQQQQQPPMKRSRVEENLYLSMGGIQNTVGLGGMSSQQLGNSSGSALTNNLNQAQQFQQQLQQQLLAQQTVNNLNAGMVGGTSTGISLTNSMYGAAPIQAVDKEALEKQMTAERKLRNREHAKRSRVRKKFMIESLQEQVRKLQVENSDLRLLVQKHIPDNALKIIDMCCSSSPLFGLPEREDGDERSGKGNDKTALIQTDFSLIQSLTSGQQNFVLSDPRLPDNPIVFATPGFYELTGYTRDQVLGRNCRFLQGPGTDPAAVDVIRSAIAKGNDATVCILNYKADGTPFWNQFFVAALRDSDNCIVNYVGVQTLVEPNAGASA…
Cyclotella_meneghiniana_Strain_CCMP_338_CAMPEP_0172283898	MSPAAISRAPPTNSLTVLESNYIAARDTDEDMSSNIMDAGLDFDLLAEYLLEDGGGMFDMGPEVKNQQNSHSDGYQLEGGQVTPQTADNTFDGFADPLADASEQLQQGGGDLPESGDLANELAHVQHIIASQQQQQMTNAPQQPQTVVKAAAPIPAYMQLPKQGQPAASEQASTLRPLVPNGTSLPQAKRPRVDDGTAMPSYVSKSSIAPQVKNTTQTPRTTYTQSTAAAAAKTTSDKGKGQDQIDRRRERNRILARRTRLRKKFFFESLQKDVADLQHENAALKSIVRSRLKPEDAQAILSTCNANEKMPSIIHDGEMDDGAGLGRDKAVKQLDKEDFNLIQNIQNSQQCFVITDPSLHDNPIVYASDDFFQLTGYSQEEVLGRNCRFLQGNKTSPEK…
Cyclotella_meneghiniana_Strain_CCMP_338_CAMPEP_0172294792	MSNNQGQTQNHNSIRPPQFVPAGVVPGMSAGAASAVQTRGTPSTLNLDDIFGDCFFTPEGEAIFLSENPQLQQQVQQQQQNQQQLSQAGLMPSGEANPTQPASRYTSTGYAPVPQAGGITTTGLHKPNAPATVMGMNQQQVPSQLPYAQAPQRPHHLQYAYVQAGGPGQAPPQAASGGAKRGSASTKEKTADRTKLVKERNREHAKRSRIRKKFLLESLQQSVSILKEENEKLKGAIRSHLGEDEANALLNKQADANAGGGLIARSSRDANKVLDDPDFSFIKALQTAQQNFVVTDPSLPDNPIVYATQGFLNLTGYTLDQVLGRNCRFLQGPETDPKAVEKIRNAIEEGSDMSVCLLNYRVDGTTFWNQFFIAALRDAGGNVTNYVGVQCKVSDQYAA…
Cylindrotheca_closterium_CAMPEP_0113620256	MSHVTTPVFGCAKSSPATNDGCQTTSHDWNIDQSADSMDFDFLTEYLLEDSTGGAPAPFDINSSSTQPEQIIESAVSGASNCRKIQVLPAQSDSRQRNLQVSEQDRSPAASIAVHPSIANTVLPKRNDGLAVSTTQQLLKTNPDYVAHEPTKRQRTENSSLSVHTTQPIVASQPQPAPDSIAGRGRKKTQAQIDRRRERNRILARRTRLRKKFFFESLQKEVGDLQRENAALKDIVRSKLNENGTKILEECSAAERLPDAVLETCGEHSSDIGQQDFNLVRSIQQSQHSFVITDPSLRDNPIVFASDDFLNLTGYSREEVLGRNCRFLQGVDTCPSKVEAIRKGISTGSDTSVTLLNYTSDGTPFWNQLFIAALRDAQDNIVNFIGVLVKVASPDPGDA…
Cylindrotheca_closterium_CAMPEP_0113620694	MAANGSGTGGPGGDEPVPMFQASNPDAVTSGNFNALDLDDLFVDCYFDVPGMPNSGAANAAAAPLPAAPAAPVAEALPASAGDAAAVGTKRTATDADLDDEGGTKELTAKQKLERRERNREHAKRSRLRKKFLLESLQEQIHALQEQMEKMKGAIKAELPHKADAIINGICGDNEKYTPLPMPSGFGPVKTLMEPDFRLMSALSGSQQNFAISDPTLPDNPIVYVSQGFLDLTGYTLDQVLGRNCRFLQGPGTDQSAVDVIRKGIKEGIDTSVCLLNYKADGTPFWNQFFVAALRDAANNVVNYVGVQCEVSKAVVEKHMGEKKK
Cylindrotheca_closterium_CAMPEP_0113621122	MSHEVQKPIFAAASANHQGDDIDFNEIFSEYFTNEFENPIDAYTGTMGNSSGGVVAMQQVVAGSPGAQHSLAVAGAESLPTGGIRTAFHSAAAAAAVVPGNQGVHYQPAKKAKVEPHAGIAYPHPGGLTSRLGVPMPLLQGQNGSQGMAAQLGANPATAGVALPVGVGIRLGGAGGVAPTTAQHAARAGGPGFLWGGPQASGISNQAIAERRQRNREHAKRSRVRKKFMLESLQEQVSSLQSENQRLRTLIQDNIPEHAQRIISECCSKNTLFGDKATAESEEKKAIALVRSDFQLMESLTSGQQNFVLSDPRLPDNPIVFATPGFYKLTGYSQEQVLGRNCRFLQGPGTNPKTVDIIRKAIATGSDCTVCILNYKADGTPFWNQFFVAALRDSDNCIV…
Cylindrotheca_closterium_CAMPEP_0113627856	MADPPPPMFSAPGDLSHGAQAAVAQRGNPSTLNLDDIFGDVMFTPDGDTVFLSEEQEALASGEKSVTTMASKPQGDKFVPVNRGGGLYTTQLTQREKPSLTMGSVGDGVQPTSSVPFSKSPQANHHVQYVTKKKSRSGDRKMSEQQKVERRERNREHAKRSRIRKKFLLESLQQSVALLKEENEKLRDSIREHLGNDKADQLLNNSGGGEAPDAALIASSQGAANKVLDDPDFSFIKALQTAQQNFVVTDPSLPDNPIVYASQGFLNLTGYSLDQILGRNCRFLQGPETDPKAVERIRSAIEQGNDLSVCLLNYRVDGTTFWNQFFIAALRDASGNITNFVGVQCKVSDQYAASVTKQQDEEDAAE
Cylindrotheca_closterium_CAMPEP_0113639660	MNVQQGMWPTGGTLNSQQQHGMAVPVTTMSTPVHFFPNGLQLNQMWMDSLAKGMTQEQVSHNNRQTQQIRQQQQQQYQPQPQQPQASPQTQHQQQYVQAVQVQQQQQQQQVNTISPMPQRANVMTAAASGFPQATQMGLSTTSPLANTTTFASPVASMQVVQQTAPTMLTTATGGVVPNRMPQAPTLNPTVTAIQQQQQQLGRGLVGYQQQPQKMKPAGRGFPEGPPIVPVIDQVAAEKERKRKNREFAKRSREKRKNEHKHLEDELRGLQKENVRLRQIVQDKIPGDAQEILKNCCKDHPLHAATVKQGVNDALAMSDFHLLENLIKEQQSFCMTDPKQPDNPIVYASENFYQLTGYTKAQTLGRNCRFLQGKDTDPKSVALIRENIKNGKDTSVNIL…
Cylindrotheca_closterium_GAPN01011529.1_5	GSLDPQDQSIHYXFNMESQSDEARSLGGFPMSIRRILSTKTRIEIDLSSRYPGAKIVMSTYNEFVKVDVEGATEEAFGNSVGLLGDFKTGKTFARDGATDPDLDEHGGNKELTAKQKLERRERNREHAKRSRLRKKFLLESLQEQIHALQEQMEKMKGAIKKELPHKADAIINGICGDKEKYTPLPMPSGFGPVKTLMEPDFRLMSALSGSQQNFAISDPTLPDNPIVYVSQGFLDLTGYTLDQVLGRNCRFLQGPGTDQSAVDVIRKGIKEGIDTSVCLLNYKADGTPFWNQFFVAALRDAANNVVNYVGVQCEVSKAVVEKHMGEX
Dactyliosolen_fragilissimus_CAMPEP_0184856468	MTTSTTASKSNMPPPGNQGRQPVQVTVPQFVPAPLSSQAQMAVSTKGSPATLNLDDIFGDCFFTPEGDAVFLSENSDVTTSDAQSNAVVALQSTSNAPGNNSARHPGAPQSVTLGGEPYSNISSVASRPLGPSGQAPTTTMQQNHTTAHSQLQSHTQNSSQHTTQAHAHAHAQAQTMIPTAQGTQQHQFVPIPYAGGISTTGLDNPGSRATVMGPPPSTINTPAPKPMINPPQRPNHFQYGIINNQQPIAVTPTPHTVATANTKSKTTPATKTGPKFATTTATATSAPKRRNVTTVGMPSSMRTNALGIGRKMSDQQKSERRSMIRERNREHAKRSRIRKKFLLESLQQSVSLLKEENNKLRKSIHEHLGDATAEELLTQENLDNASNIAANSLIATSK…
Dactyliosolen_fragilissimus_CAMPEP_0184859260	MLNNSGNVSIKAEETNEEHDLAANGPLQPMFAPSSNIDQETQLTGDSNNNLDLDDLFRDCYFGDFQTVDVATTTAPPLPSDITPNPLINTQTSVNDMVTHKRKAGDALLSNLATPMTVSSGLQEKNDNIMSVAKPLTDQQKVERRERNREHAKRSRLRKKFLLESLQEQINGLQSEIEAFKDIIRKECPDRADQLIESVGGPKGKFTPLPMPSGFGPVKTLMEPDFRLMSALSGSQQNFAISDPSLPDNPIVYVSQGFLELTGYKLNQVLGRNCRFLQGPGTDQSAVDIIRKGVREGVDTSVCLLNYKADGTPFWNQFFVAALRDAENNVVNFVGVQCEVSKAVVEKQAAELREKELNKG
Dactyliosolen_fragilissimus_CAMPEP_0184866120	MSGQQEELQNRGFRHPIFAPTNQNSKHSEDIDFSDIFANYFNDVEDPLTTFSNYSTFGEDASGYSVTQQQQQQQQQQQQQLTSIPKVPIVGNVNPIQGAINDKTTSTGLQLPTGRGIKTAWHSGSLPCISGTRSLPQAQELAPVSKKPKIPEQVYEPSVGNLVNNIHLSGAGKNIGANAISSNSNSLNISSSSSAISGRLGFSMVGGQLALPHQTNAQNQSQVSQERKVTSDSGTTLPVGVGIRVGSFFPQQGNNVPVNQLNVANDNYGLWAGLGGGGISEQAMAERRQRNREHAKRSRVRKKFLLESLQLEVQQLQKENEQLRMLIQGKIPQHAQKIIDECCQKNPLFGDDKSESTNDKNSTELVKSDFSLIQSLTSGQQNFVLSDPRLPDNPIVFAS…
Dactyliosolen_fragilissimus_CAMPEP_0184869156	XNVNESSNKGNYGLQIQDGNDLLDFNLLAEYLLDDGANDDNGMEFGIETPPATAEQQSAGIVSPEQSEMYNAATNHGSLTNINTANYKNATTFTINNTNIIQTTGPSAAPPASQASLPSLPLPHSTLGPGFPQPISAKPMQVLAPMPAAPYAPIAPPIQPSLPNSGQSVTMTVHQHKRLRIEAPGPVQKNVPMVSIAGNTITSHPAITHGHIPIPQILSGRGGRQKSQAQIDRRRERNRILARRTRLRKKFFFESLQKDVTDLQKENLALREIVRTNLEPEKAKTILDTCKAQEELPRIVTEHCGDLSSLDRQDFNLVNSVQYSQQCFVITDPSLQDNPIVYASDGFLELTGYSRENVLGRNCRFLQGAETNKAKIAQIAKSISMGEDVSVTFINYAAD…
Detonula_confervacea_Strain_CCMP_353_CAMPEP_0172300448	MSNANNFLQNMGMQMPMFTAANQQAGTSDDVDLHDIFADYFNEDNTAAAELFSNAQQQQAQAQAQAFPNTLAVQQQVQQQQQVQQQQQNQQVQQQQQQQQQQQVQVQAVQQQLAANAAAAAAQAQHQAQAQQQPQLSLPTGQGIKTAWHSGSLPAMHNRGVVAANANNNNNQMTQQQQPQAKRSRGEELYLPVQVQQQAQVQLGGAIVNGQQQQLQQQHSNSLGGGIGNNVNNSNVTVTAQQQQQQQMALAQAASGVGALSSRLGFTLPNTAATANNNTGLISGIAGAAVAGSGSSNNHMMGQQQQLQANNTAANTNAAGGGTMINLPIGMGMKFGTGGSIVPTQPSGVAGIGMQANVVGGAVGLANSNAVMNNHAAIAVVAGIGNGGGILSGNMNNSN…
Detonula_confervacea_Strain_CCMP_353_CAMPEP_0172302006	MSSPLPDPIPVPDPIAVLDPTPVGGPAVPAAVANGASSNENKKTSAMHLFAPEPNASGENEPLDLDELFHDCYFGDFSVPEDVTSTAVATTVAVAPVPAVPAKRSAEQAGLTAPSPAAPPAQAHKPAPVPSSSIYDADPTSSSDIGGISTKPAASLTESQKIERRERNREHAKRSRLRKKFLLESLQEQIDGLQSEIHMLKNIIKSELPDKAAELLKDLDDEGNSDDPSQPKKGSYTPIPLASGFGPVKTLMEPDYRLMSALSGSQQNFAISDPSLPDNPIVYVSQGFLTLTGYTLDQVLGRNCRFLQGPGTDQAAVDVIRRGVREGTDTSVCLLNYKADGTPFWNQFFVAALRDAEDNVVNFVGVQCEVSKAVVEKHISEGKTPGTALT
Detonula_confervacea_Strain_CCMP_353_CAMPEP_0172302696	MSDNQSQNANIRPPQFIAAGVPGLSASATAAVQSRGTPSTLNLDDIFGDCFFTPEGEAIFLSENPQLQHQVQQQQQLNQQQQQLNQQHQQVQHQAQQQQQLAQGALLASGEAAPSQNASRPAGAAGYVPGGIVTTGLHKPKAAVTVMGNASGNAAPPTVAPFAQAPQRPHHLQYAYVQAGGTQAPPSGNTGGPSIGGAKRGRGGASSSGGPKPEGQTKADRSKLVKERNREHAKRSRIRKKFLLESLQQSVSLLKEENEKLKSAIRSHLGDKEADALLSKQALADAAGDGGGLIASSSADANKVLDDPDFSFIKALQTAQQNFVVTDPSLADNPIVYATQGFLNLTGYTLDQVLGRNCRFLQGPETDLKAVEKIRNAIEEGSDMSVCLLNYRVDGTTFW…
Detonula_confervacea_Strain_CCMP_353_CAMPEP_0172319714	MDSALDFDLLAEYLLEDVGAGGFDFSSHAVSPPTIDPLKNQQAFSALPQDPGVVTPNGSTSFFVDPLSNVAAQLAQQQQPPAALPLPTGGDMAGELSQVQQMIATQQRVTNNPIAPVAVAAPRLPIQQRPQIRPLARPAPQNNMMAVLRQTAVARAPISAASLIQRTAMPKHGMPVPIAQQPPNKRPRVSAAPSSKGPSYSFASVSGVARSAAAAASPAEHAHALSATLGGNRQKSQAQLDRRRERNRILARRTRLRKKFFFESLQKDVEDLQRENAALKSIVRSRLKPDDARVLLEQCNANEMLPSAIHARDIEGMANSERAGAAGDHVGVQKLDKEDFSLIQSIQNSQQCFIITDPSLHDNPIVYASNDFLTLTGYSQEEVLGRNCRFLQGTETCPT…
Ditylum-brightwellii-GSO103_CAMPEP_0187306952	MSGPHNVFQNSGVQKPMFAPKHSQLTDDIDLNDIFADYFINELEDPLTSYANSVSKYSGAAAAVALAQQQQQAAALAAAAAIPQPQQMVQSTPAPAPVATSLPLPTGRGIQTAWHSGTLPNVSGTGTILQAAQMEAQAPAAKKVKVEAAPQDSGYQIAPTPMSQAPPTGAPAPLSAPQTANAASGLSGRLGFSIVGGQLAVPQQGGGVQQQQQQQLASAPGPSATPGNVTLPVGMGIRVGGAGGVVPPGAASGNAMLSHTQWGGGGAQQLSHAQHGQPGVPGQFLMWNGMGAAGGMSDQAVAERRQRNREHAKRSRVRKKFMLESLQEQVRGLQKENVHLRMLIQEKIPLHAQKIIDDCCQKNTLFGDFQKNAEKEKSDDAKELVRSDFCLIESLTSGQ…
Ditylum-brightwellii-GSO103_CAMPEP_0187330908	MTVTIPRFVSASTNSSTIQGDGAQPTNNWGALGDPLESATDFDLLAEYLLDDGMFALGAVPPFESSSDAPSITTQAQSGAISPKQMEDSFVDPLADAAEQLKQAGYRGQNGDLAEDLAQVQHMIAAQAEAAEMRMNGSSYVETAPAPNPVPPDPTRANTISPQPLTTPASAPLHSLLHPAPRTVPFYPVETAPAAAPLPIPAPVTVPAPMTAPMPAPPAVVSPPASSNPLPPQLPTIPSPGNKRRRIETIPTVLGVVNGTNHFLSVTTNGKSGRRKTQEQVDRRRERNRILARRTRLRKKFFFESLQKDVLDLQRENFVLKDIVQKRLEPDVAKKVLESCKASEQLPSIISEQCEENGIPTQLDQQDFNLIRSIQKSQQCFVITDPSLQDNPIVYASDD…
Ditylum-brightwellii-GSO104_CAMPEP_0193941218	MLPVFLCVYVGQRLLNLASSSVLSVLVVXEAGGNNTSDVDLDDLFRDCYFGFADPISSSDVTTHLNASVVPPPPPPLPAAAVPLPTLVPPPPPAAAPSTTIANVTTTSLTAAPAVATTAVAPDTIMSTPPTTMAQSTNLALKRTADVAGLDTLTSSPSSYAKSSKPQSDSKELTDQQKIERRERNREHAKRSRLRKKFLLESLQEQIHGLQTEIESLKDIIKREVPEKAESLIKSACGEEGSFTPLPMPSGFGPVKTLMEPDFRLMSALSGSQQNFAISDPSLPDNPIVYVSQGFLDLTGYTLDQVLGRNCRFLQGPGTDQSAVDIIRRGVREGIDTSVCLLNYKEDGTPFWNQFFVAALRDAEGNVVNFVGVQCEVSKAVVEKHIAENKDPHTPRPPPV
Ditylum-brightwellii-GSO104_CAMPEP_0193941580	ADINKRIRYTRQDTPFSNIREDTTPYRPQSKRITEQYAHTVDTATDPTTDTMSEPNNNVNTTAVQPTSAPYPNATQGEASKLAPPTTAVEQAQKTKGALTMFAPSTNADEAGGNNTSDVDLDDLFRDCYFGFADPISSSDVTTHLNASVVPPPPPPLPAAAVPLPTLVPPPPPAAAPSTTIANVTTTSLTAAPAVATTAVAPDTIMSTPPTTMAQSTNLALKRTADVAGLDTLTSSPSSYAKSSKPQSDSKELTDQQKIERRERNREHAKRSRLRKKFLLESLQEQIHGLQTEIESLKDIIKREVPEKAESLIKSACGEEGSFTPLPMPSGFGPVKTLMEPDFRLMSALSGSQQNFAISDPSLPDNPIVYVSQGFLDLTGYTLDQVLGRNCRFLQGPGT…
Ditylum-brightwellii-GSO105_CAMPEP_0187337486	MASETTSVPVRPPLFAPTADQQTTTNNDAVPGLSARAAAAVSTRGTPATLNLDDIFGDCFFTPEGDTIFLSDTQQQQYPQQQQQQQVQQQQFLQQQQQQQQQAAADNSGIIASGEANPSMVAAKPSGAGYVPVPLAGGISTTNLDRPGSHALTMGPASGTATVAAPAAVAQPQRVHHLQYATPAMIQQSQQQAAAMASGGANAVGVPTATPRTQASVGAKRGRGGGSLGGTAGGRGASADRKMSEQQKVERREMVRERNREHAKRSRIRKKFLLESLQQSVALLKEENEKLKSSIRTHLGDEQAEELLNSRAMAEATANASAGGLIASNATDANKVLDDPDFSFIKALQTAQQNFVVTDPSLPDNPIVYATQGFLNLTGYTLDQVLGRNCRFLQGPETD…
Entomoneis_sp._Strain_CCMP2396_CAMPEP_0198140734	MADKNVPPPLFAPTHLSAEAQAAVASRGMPSTLNLDDIFGDVVFTPDGDTVFLSENKDTLGSGAGDTNNASRISADGKRKKIASGGGLYTTHLMDGKASSAMGTSADDVQSTDRVDYKSAPQKSNHLQYAAPKKKKESRSGDRKMSEQQKVERRERNREHAKRSRIRKKFLLESLQQSVSLLKEENEKLRDSIRSHLGEERASELLSKSKDTSIDGLLANSQSIANKVLDDPDFSFIKALQTAQQNFVVTDPGLPDNPIVYASQGFLNLTGYSLDQILGRNCRFLQGPETDPKAVERIRKAIEQGHDMSVCLLNYRVDGSTFWNQFFIAALRDAAGNVTNFVGVQCKVSDQYAATVIRQQEEEDED
Entomoneis_sp._Strain_CCMP2396_CAMPEP_0198148184	MSIISECCTSSPLFAEGDLDGDATKIGRSDFSLMQSLTSGQKCFVLSDPKLPDNPIVFATPDFYKMTGYSSKEVLGRNCRFLQGPGTDPRAVDVIRKAIATGSDATVCLLNYKADGTPFWNNFFIAALRDSDNSIVNYVGVQCEVEPETGDNDVEEKVNEVLPLAVRDEEDDDNDDDNDSS
Entomoneis_sp._Strain_CCMP2396_CAMPEP_0198154382	XNSQHAFIITDPSLPDNPIVFASDDFCKLTGYERDQVLGRNCRFLQGPDTCKKKVREISEALKNGEDVPVTFVNYMADETPFWNKLFIASLRDAQNAIVNFIGVLAKVAGPLPDDPEYGKVVAGMEECGGGESDGDGDEEDLEQPASDAPPAEHLK
Entomoneis_sp._Strain_CCMP2396_CAMPEP_0198154564	MADQNGNSRNLPLFKVSDPMSNQQIDLDELFNDIYYLDQNEIPDPTPVEAHSSSEGNPSASMAPPISSNYEPLAEKKRSANEAGLKDNGNDGNDDTHHGGGADDSEFGNKDLTEQQKLERRERNREHAKRSRLRKKFLLESLQGQINELEDEAQGLKDAIKKEIPEKSDEIINSVCGHKDKYTPLPMPSGFGPVKTLMEPDFRLMSALSGSQQNFAISDPTLPDNPIVYCSQGFLDLTGYTLDQVLGKNCRFLQGPGTDQSAVQVISKGIAEGVDTSVCLLNYKADGTPFWNQFFVAALRDAQNNVVNYVGVQCEVSKAVVEKHMPQAVKK
Eucampia_antarctica_Strain_CCMP1452_CAMPEP_0197826606	MSQVLNAMRVALPRFMGASASKKQKQNSDSQVTLSSHNWGNYSASQSNSQQQEDPLDFDLLAQYLLDDGTANGGPDFGIDIPFFATATNNHRVNPHDGSFSDPLSSVPVQQPMNAAPTSSPYEISSQSQAHRITTTNAPLTQQRVAPPTLLVSNVFSAPVTSPHSIPLNSAPQSIAPAGPVPSPVPPVLTHQHKRPRLQTTPSINNSSAPPVGMLLASKGTNFSPSFPQKGGRPKSQAQIDRRRERNRILARRTRLRKKFFFESLQKDVMDLQQENMILKEIVRSRINPNDSKAIIDSCKANEQLPSCVLEQCGDMSNLDRQDFNLMQSIQKSQQCFVITDPSLQDNPIVYASQDFLSLTGYSRDEVLGRNCRFLQGPETSQTKVKQIRQAVTTGADVT…
Eucampia_antarctica_Strain_CCMP1452_CAMPEP_0197826936	XGPAAAISSHTSLTSSSLPYQQPTQLRHHLPFATTSITTPSQQTQQPQSRLQSSAITKKKPGPTNSDRKMSDQQKSERRERNREHAKRSRIRKKFLLESLQQSVSLLKEENDKLRSSVREHLGDAEADILLQKENLEEAAQAAGSLIASSNSDANKVLDDPDFSFIKALQTAQQNFVVTDPSLPDNPIVYATQGFLNLTGYTLDQVLGRNCRFLQGPETDPKAVEKIRHAIEQGTDMSVCLLNYSVDGSTFWNQFFIAALRDAAGNITNYVGVQCKVSDQYAANVCKKQYEDDTPDSSISNKGEEVENVVDAVISDIKSED
Eucampia_antarctica_Strain_CCMP1452_CAMPEP_0197829144	MASTETGTDGQTAPSAGGQRNSSEPPKFLSTPQAPLSSVTATVLTAAAPALVPSPLPPSQAQSSAPLPMFVPSNSQAGNGNYAADSIDLDDLFHDCYFGEFPYGSINTSDHNSAVPAAPEQANIPPPPPPPPPPAVPLAVAYPHPLVPNQAHQPVASFPMKRKAGDVGLLPPPNNPVNNGAHIATANPIYTPDTTPSSGSLVPHSTFSSSTGTKLLTEQQKVERRERNREHAKRSRLRKKFLLESLQEQINGLNSEIDALKDVIRKELPTKAEELIESVSVPKGNFTPLPMPSGFGPVKTLMEPDFRLMSALSGSQQNFAISDPSLPDNPIVYVSQGFLDLTGYTLDQVLGRNCRFLQGPGTDQSAVDVIRKGVREGVDTSVCLLNYKADGTPFWNQFF…
Eucampia_antarctica_Strain_CCMP1452_CAMPEP_0197836162	PASVNNNPFLRAWSGLSDGKGLASEKAAAERRHRNREHAKRSRVRKKFLLESLQQQVADLQKENQQLRMVVQTKVPQKAQKIISECCSKSALFDDNGKKGNGKTDLVKSDFTLMENLTTGQQNFVLSDPRLPDNPIVYASEGFYNLTGYTSDQVLGRNCRFLQGPGTDPKAVDIIRTAVANGTDATTCILNYKADGTPFWNQFFMAALRDSDNCIVNYVGVQCEIETDAGASALEDKVNAVLPLQIKGENINDEWG
Extubocellulus_spinifer_Strain_CCMP396_CAMPEP_0200424236	MAENGSEEAAGGDHPSAMSLFAPATQAVDGVNDEENALDLDELFRDCYFGDFPLPPLGGAAPAAPQDDAAAAPAKRKADEMVAASKPMYATTGGVTAASAAGSEAEPGPADKAVSSSGGGAKQELTEAQKIERRERNREHAKRSRLRKKFLLESLQEQIHGLQGEIATLKNIIKSELPDKAEELLNKVGSEAGEFTPVPTPSGFGPVKTLMEPDFRLMKALSGSQQNFAISDPSLPDNPIVYVSQGFLDLTGYTLDQVLGRNCRFLQGPGTDQAAVDIIRKGIREGIDTSVCLLNYRADGTPFWNQFFVAALRDAENNVVNFVGVQCEVSKAVVDQQIKDGKMPAPVGGTALGK
Extubocellulus_spinifer_Strain_CCMP396_CAMPEP_0200425072	MSSSAVPLPRYISASTASKKEENRGSGAGAGGAGGTLTNLNDWGAGAASGGGDPLDFDLLAEYLLDDGASGPGGMDISFDFNVETPPINASDGSPGIVSPEQLAETSFADPLADATEQLTSGGPTGDIAGDLAHVQQMIATQAAAMTSAPPSSTSTAASKAKPPPAARASAFPNAPPFAGAPTSSKGPPHRGSAAAAFAADSNKRRRVDVSAPVTANASAMATNGLSSFPQQKGGRQKTQAQIDRRRERNRILARRTRLRKKFFFESLQKDVTDLQQENALLKDIVRNRLKPDVAKGILDQCKANEELPSVIAEQTTGLDKRDHNFIQSVQKSQQCFVITDPSLQDNPIVYASDDFLSLTGYAREEVLGRNCRFLQGTETSTAKIGQIRKALENGDDCN…
Extubocellulus_spinifer_Strain_CCMP396_CAMPEP_0200430836	MSGADGFQQPLFAPAQGDKNGEPDLDLNDLFADYFVNEMEDPLRTFNQTVTASMQPTDAAAAQQQLQQAAAAVAGSVVGGGTGSAPPAGGVAPAPAALPTGRGIQTAFHSNNAAATMNATAPSAAVPGLGESVQQQQTQQYQVQQQQQQQRQAAEPATKRSKMENSLATGGGISSRLGFTLQQPGQAQPQQQQAQVSLSTGIGGYPQQQQVSLPVGVGIRIGGNGGVATGPGGISMTHTQWGAASGGAGGVGLSHVQHGQTAGASYPMLGGQANMMGGMGIPGGPMSDQAVAERRQRNREHAKRSRVRKKFMLESLQQEVHGLQKENAVLRQIIQAKIPEHSQKIIDDCCQKSPLFDDDAKSPIHDVKIDNKDAPKELVKSDFSLISSLSTGQQNFVLS…
Extubocellulus_spinifer_Strain_CCMP396_CAMPEP_0200439646	MSTIGGFGGFAPLPLLSDPAVAAATSAGSSGDTNISSTRSTSRTQEARREKAKLHARKCREKKKNEFEYLQQEERLLREENQRLRALVRSRIPDRAQAIVSECCYSNERVKHLNPYIQQVIDLDDSAGGGGGRGGTGADLARSDFDLIESLAAARQPFILSDPRLPDNPVVYCSDAFCELTGYKRDQVIGRNCRFLQSPETDPRAVEAVRRAIEIGRDATTVLLNQKADGTTFWNRLFVAPLRDRHRRIVNYVGVQTATNAPKVDRDVDTMGTRTVESAPVEIKRISSTAAFRSADAATMDVTPTPVVAPAESRMATIQGQLVNFEDSDVDDDQLGDVDWTILAEALETDYADEDDKEHEWGDRWIKVEDVIPSVFPVSSAALDRQLIDFVHRPRLFTT…
Extubocellulus_spinifer_Strain_CCMP396_CAMPEP_0200504728	MSDQPIPTSVNTPHFAAAGTGGGAPAPGPAAAGNQTGQLSAPTAAAVANRGTPATLNLDDIFGDCFFTPDGDAVFLNDQPEQEQDAVVASAEAVPTSMASRPVPAAGAAAAAAAPTAAAPAQVTAGGYVPVSYGGGIATTGLDTAGAKATVMGTVPTASRKYPTITETANHRPAPSLPGIESISSKYSRSLSLITSRRLFAEANARLSLKFSGSTIVGTWGRHPYLVDKIGQINWDRKGNFIDQIDIAAAAAAAAAQSWSEEGGSTRAXSLAGIEIKTLHKDXIETKTMSDQPIPTSVNTPHFAAAGTGGGAPAPGPAAAGNQTGQLSAPTAAAVANRGTPATLNLDDIFGDCFFTPDGDAVFLNDQPEQEQDAVVASAEAVPTSMASRPVPAAGAAAA…
Fistulifera_solaris_JPCC_DA0580_GAX09282.1	MVAYNLINPPAATGVALSKAAFQTTAYNPDGTTSVPLFHSSVLGDASLGAFNYFVTLPSVTATTVDTKAPETELFSLLSSQAPTLGVSRMPAPTNVTTFPKATEPKPSKKRTAPVDAFEFLMQQQEQEDDDNEEEVSEDEPEERTPTGRPKKKKSIVQKERRRERNRLLAKKTREKKRDYLETLQMEVLALQRENYKLRDLVKSEVVNPEEILQGCNALESVPESVLDACKEMEQADPEHLFDMATRIKTSQHAFIITDPSLPDNPIVFASGDFLKLTGYDRSQVLGRNCRFLQGPHTNSAKIEAIRTALATGEDVSVTLLNYRADATPFWNQLFIAALRNANSEIVNYMGVIVEVTGPAPGDPEHGKALPSRVAGANAAPDIDTAAVG
Fistulifera_solaris_JPCC_DA0580_GAX09413.1	MFPNNIQQPLFAPATQRLQQDDLDFNEIFSEYFINEFDDPLNAYTNSMANNYNNLNFDSSTIAQVYAPDNTPKVNNKVNLPTGGIRTVFHGSVEQANAASPPTKKPKIDDPPKPTIPPSAPGVSLPVGVGIRLGGVGGIAPSTAQSSARIAGVQSQFMMWGGDDGAPEHVVAERRQRNREHAKRSRVRKKFMLESMQQQVLDLQRENQRLRMLVQEHIPEHSQQIITECCHPNPLFGDPDELGFTADETMDQADSALMNSLATGQKCFVLSDPKLPDNPIVFASQGFYDLTGYTSKEVLGRNCRFLQGPGTDPKHVEVIRKAVATGSDCTVCILNYKADGTPFWNQFFLASLRDSDNAIVNYVGVQTEIQPDQGVSMLEEKVNAVMPLQNKE
Fistulifera_solaris_JPCC_DA0580_GAX11767.1	MTDANVAPPLFTSVGGGNSAPSRSLPRGNAVALNLDDIFGDVMFTPDGDTVFASEETVEGGILNSGEGDRVATHATRLRDDGTAEAVQNAGGIATTQLVEQGKPALTMGRGTGGTTAAIPFHHNPQASHQLQYAVPKKKKSSDRKMSEQQKSERRERNREHAKRSRIRKKFLLESLQQSVALLKEENEKLRQSIRSHLGPDKAQQLLNEKDNGPSIDGLLASSQGIANKVLDDPDFSFIKALQTAQQNFVVTDPSLPDNPIVYASQGFLNLTGYSLDQILGRNCRFLQGPETDPKHVERIRKAIEQGNDMSVCLLNYRADGTTFWNQFFIAALRDGSGNVTNFVGVQCKVSDQYAASVMKQQEEEEAAANADAM
Fistulifera_solaris_JPCC_DA0580_GAX13101.1	MTAYNRINPPAATGVATSVAAFQKTAYNPAGTTSVPLLHSSGLGDASLGAFNYIVTLPSVTPTTVATNAPATEIFSLLSSQAPTLGMPKIPAPTNMTTLPKATQPKPSKKRSAPVDAFEFLMQQQEQEDDDNEEDVSEEEPEERTPTGRPKKKKSIVQKERRRERNRLLAKKTREKKRGYLETLQMEVLALQRENYKLRDLVKSEVVNSEEILQGCNALESVPQSVLDACKQMEQADPEHLFDMASRIKTSQHAFIITDPSLPDNPIVFASGDFLKLTGYDRSQVLGRNCRFLQGPNTNSAKIETIRTALATGEDMSVTLLNYRADATPFWNQLFIAALRNANSEIVNYMGVIVEVTGPAPGDPEHGKALPRTVVGANATPDIDTAAVG
Fistulifera_solaris_JPCC_DA0580_GAX13918.1	MASESVGRGGLPYQSSDPNASHTVDLDDIFNDIYYMDFLNPDGSVKQDALPEPEITTSTTNKSVEKKRSAKDADLDNSNNDEEDSKELTEAQKLERRERNREHAKRSRLRKKFLLESLQEQIHELEEQITGLKDAIKTEIPHRADAIIKTVCGDKEKYTPLPMPSGFGPVKTLMEPDFRLMSALSGSQQNFAISDPTLPDNPIVYVSQGFLDLTGYTLDQVLGRNCRFLQGPGTDQNAVQIIRKGVEEGVDTSVCLLNYKADGTPFWNQFFVAALRDAENNVVNYVGVQCEVSKAVVEKQMAKQNRKITEGS
Fistulifera_solaris_JPCC_DA0580_GAX23974.1	MTDHVDYSSFAPRFGRAGTGNLNEWGDTDNFDVDVLAAFLLGEEKPSGVTFDFNLGNGNAGSYVSPENSEDGFHPLCGDASTFPSTMQYEKGVLQQQQPASAPIGFPVLPCPVGSDEAEMSKRMRVEGNNGAIYAVTSGPTNSFVSAFSSAAAQAMLQQPARGRKKKSQDQVDRRRERNRVLAKRTRLRKKFFFESLQKEILDLQRDNLNLKAIVKENLDEGVARQILDGCNALEQMPPSVLEACSEGFEDMDSQDFNLVQSIQKSQHAFIITDPSLEDNPIVFASDDFLKLTGYERSEVLGRNCRFLQGEQTSKAKLAMIRDGLSKGEDVSVTFINYMRDGTPFWNKLFIAALRDAQENIVNYIGVTVVVASPPPGDSEHGVRLPEEPYFSDGENGC
Fragilaria_radians_MOB02523.1	HRCVVNMPSQDVATPIPSANVAVPMFVASNPTASDNLTDNVDLDDLFRDCYFGDFPVPPFANEPYLPTSGSNNSLLDDTLDKKRSADEAGIDEDIDGEDSKHLTEQQKLERRERNREHAKRSRLRKKFLLESLQEQIHGLQAEIDSLKEVIQKELPDKADEILKKLMGDREKFTPLPMPSGFGPVKTLMEPDFRLMSALSGSQQNFAISDPSLPDNPIVYVSQGFLDLTGYTLDQVLGRNCRFLQGPGTDQNAVEVIRRGIREGVDTSVCLLNYKADGTPFWNQFFVAALRDAENNVVNFVGVQCEVSKAVVEKQMSDAKSSSTSQPRSA
Fragilaria_radians_MOB02595.1	MSAPIFAPTEPGLSSAASAAVAQRGTPATLNLDDIFGDVLFTPDGDTVFLSDLQGEGADILPSGESQVATVASRIGPDGKPIPVPLAGGISTTQLDQEGKPALTMGAAGGSGPSNLVPYAQAPQQRHHLQYATPEMMNSLKKRKTGSKSSDRKMSEQQKVERRERNREHAKRSRIRKKFLLESLQQSVSLLKEENEKLRQAIRSHLGAAEADELLGKHFAGNDAGLIANSSMDANKVLDDPDFSFIKALQTAQQNFVVTDPSLPDNPIVYATQGFLNLTGYTLDQVLGRNCRFLQGPETDPKAVEKIRRSIEEGTDMSVCLLNYRVDGTTFWNQFFIAALRDASGNITNYVGVQCKVSDQYAANVCKKQEEDEEDDEE
Fragilaria_radians_MOB09414.1	MLGEDIDLNEIFADYFINEFEDPLNAYTNSMANYNGAAAAVALAQKQQQIDIKMEMNNAFSQQNYSILPTGGIKTSFHSAANAQQQHNQNDESSSSLAPVPKKLKAEEQQFSGAGVVTAFHQTAIPQQGDLIIGRGTISGRLGISLAGNTLGVTMQQQQQQQNLSQTQNCTYTTQVTSTPQQLPHAGGIPLPVGVGIRLGGIGGVAPSTAQAAPRGAHYTMWSGVASNSTGAGAMSEHAIAERRQRNREHAKRSRVRKKFMLESMQEQVRALQKENLELRMLIQEKIPTHAQTIISECCSKNSLFSDLTNLEGDEGETLKPTSLERADLTLIESLTSGQQNFVLSDPRLPDNPIVYASPGFYVLTGYTQAQVLGRNCRFLQGPGTDPRSVDIIRKAVAS…
Fragilaria_radians_MOB16555.1	MATIVNMLPVTVPRFASSSSQVQDPPPQSLVQTSQWSSNNGDVHGAGDLDFDLLAEYLLDDSTAIGVHMNGMPQFDFSEATSGSGFISPEQSEDGNQESTNVSRPTGSTFSSPQPLLAPAGSMLTSNGMAISLHHSISPVQAPGTTSFSILPTQVLAPLQTAPSLIVHQHSSSIAAPSTALSGPKRKRVDMPTPVYAVGSSLQVPHYTANGQMVGMVSVAGRGRQKSQAQIDRRRERNRILARRTRLRKKFFFESLQKEVNDLQRENNSLKDLVKKKFNAEDAKQLLSECNAMASLPRDVQEAVFENADLDNQDFNLVRSIQRSQQCFIITDPSLQDNPIVYASDDFLSLTGYDRDEVLGRNCRFLQGTETSAEKVEKLRKSISLGEDVSITLINYTAD…
Fragilariopsis_cylindrus_CCMP1102_234187	MSHGIQQPLFASASAQGQGDDFDLNEIFAEYFISEFENPVNAYTQGMGNYASGNNTSQAGAATAPHLGNAAPLPITNSFAPAPINNTVQQQPQQVQQVQPLQQPGLSSGIRTAYHAAVAAPPMQPQQQQQQQYGLPIAKRPKLEPGIKTAQVPANVAMTGGVTSRLGFNTGNLHQGGSTHIMSGGIHAPLAQQQQIGGQYQQQQGAIGGGVALPVGRGIRLGGAGGVAPATARKVPGVAGGMIWGGPQMMGMSDQAVAERRQRNREHAKRSRVRKKFMLESLQEQVAALQRENQRLRIIVQDSIPEHAQVIISECCTSSPLFGDGDNPALPSIGLDDESIDGKKASALVRSDFQLIDSLSAGQQNFVLSDPRLPDNPIVFATPGFYKLTGYTAEQVLGR…
Fragilariopsis_cylindrus_CCMP1102_236727	MSTGNQHHQHHQQPLQPLQQQQQQVQTPMFSTDLSATTAAAVAQRGTPATLNLDDIFGDVMFTPDGDTVFLNEEQEDNAVLGSGEGPGQVTHTATRIVQGQQAVPVPRGGGYYTTQLHDNTKPALAMGNNVPGVTKATSAVPFKEAPQQRHHIQYALSNKKKSSRSNERKMSEQQKNERRERNREHAKRSRIRKKFLLESLQQSVAMLKEENDKLRDSIRTHVGEDQAKKLLDDKMNDSNGDLRLTTSSQGAANKVLDDPDFSFIKALQTAQQNFVVTDPSLPDNPIVYASQGFLNLTGYSLDQILGRNCRFLQGPETDPKSVERIRNAIEQGEDLSVCLLNYRVDGSTFWNQFFIAALRDASGNITNFVGVQCKVSDTYAASVIKEQQRDEEEVAEDE…
Fragilariopsis_cylindrus_CCMP1102_238237	MSAPNGDANAPMPMFQMSNNQSNTMAGQGGSSNSLIGMTNGGGMSDIGQLDLEELFVDCYYDVPGMAEMVKDDVANGGGGMAGPEPVMVPPPAQPIATTSMSSTTDAAEDINNKRSADEITSGGDDTSGPGGGQLTAKQKLERRERNREHAKRSRLRKKFLLESLQEQIHGLQEQLDKFKKTIRDEIPAPKAETLIDAICGHENQYTPLPMPSGFGPVKTLMEPDFRLMSALSGSQQNFAISDPTLPDNPIVYVSQGFLDLTGYNLDQVLGRNCRFLQGPGTDQSAVDVIRKGISEGIDTSVCLLNYKADGTPFWNQFFVAALRDAENNVVNYVGVQCEVSKAVVEKHMGEQKKK*
Fragilariopsis_cylindrus_CCMP1102_259459	MLASLPAMSQPVTIPIFASSAQHTQQQDGGSEWFTMDDGDQDMDFDLLAEYLLEENPTVNNRSDFDFNNEYVVSPEQSDDGVGDSGATLARDIITQHAATIATAVTSNPAATTSQPPKSQQQQQQQVMYAPVAAPPLLVAPPAPPQIAAQGISLGMALPRTITQYSAQHGMAPAPVTSAPIARTTTTTKSPTRTIQKKAGGAADAKRRRTNPPEVAAQGLINTSYLTNPANMSPAVVAAAAAAAAMQGRGRKKTQAQIDRRRERNRILARRTRLRKKFFFESLQKEVMELQRENSALRDIVRTETLTLSRVSSNRNIPFIITDPSLQDNPIVFASDDFLTLTGYSREDVLGRNCRFLQGEKSSKDKLDVIRKGLATGEDVSVTLVNYTADGTPFWNKLF…
Fragilariopsis_cylindrus_CCMP1102_266505	MLASLPAMSQPVTIPIFASSAQHTQQQDGGSEWFTMDDGDQDMDFDLLAEYLLEENPTVNNRSDFDFNNEYVVSPEQSDDGVGDSGATLARDIITQHAATIATAVTSNPAATTSQPSKSQHQQVMYAPVAAPPLLVAPPAPPQIAAQGISLGMALPRTITQYSAQHGMAPAPVTSAPIARTTTTTKSPTRTIQKKAGGAADAKRRRTNPPEVAAQGLINTSYLTNPANMSPAVVAAAAAAAAMQGRGRKKTQAQIDRRRERNRILARRTRLRKKFFFESLQKEVMELQRENSALRDIVRTEVETEEGRELLEQCKTARQLPREVLEACGENPDLDQQDFNLITSIQQSQHSFIITDPSLQDNPIVFASDDFLTLTGYSREDVLGRNCRFLQGEKTSKDK…
Fragilariopsis-kerguelensis-L26_C5_CAMPEP_0188077976	MSTGNHHQQQQQQAQAPMFTPDLSATAQAAVAQRGTPATLNLDDIFGDVMFTPDGDTVFLNEEQDALGSDEQHVTNSATKIQEGQQSVPIPRGGGYYTTQLHDNTKHALTMGNIVPGVTKTTTAVPFKEAPQQRHHIQYALSSSSNKKKSSRSNERKMSEQQKNERRERNREHAKRSRIRKKFLLESLQQSVALLKEENDKLRDSIRTHVGEEQATMLLEDKMDGNNGDLRLTTSSQGAANKVLDDPDFSFIKALQTAQQNFVVTDPSLPDNPIVYASQGFLNLTGYSLDQILGRNCRFLQGPETDPKSVERIRHAIENGEDLSVCLLNYRVDGTTFWNQFFIAALRDATGNITNFVGVQCKVSDTYAASVIKEQQKDDEEQAADQEQEEEQQTQQKQA…
Fragilariopsis-kerguelensis-L26_C5_CAMPEP_0188094004	MSTVPPNPPSNGTGNEAPMPMFQMSNANAVSERRSSFNSMNGGISGGMDIGQLDLEELFVDCYYDVPGMAEMVKNEPANGGAGVAAAPVPLAQKQQATFPGQIAISSVAASLAAAVPPTVVVGDHHSTLEMVVPPQPTMVTSESTAPTSIGDDRKRSADEITSSGDVGDEKANGGQLTAKQKLERRERNREHAKRSRLRKKFLLESLQEQIHGLQEQLDKFKKTIRDEIPAEKAESLIDAICGHENQYTPLPMPSGFGPVKTLMEPDFRLMSALSGSQQNFAISDPTLPDNPIVYVSQGFLDLTGYQLDQVLGRNCRFLQGPGTDQSAVDVIRKGISEGIDTSVCLLNYKADGTPFWNQFFVAALRDAENNVVNYVGVQCEVSKAVVEKHMGEQKKK
Fragilariopsis-kerguelensis-L26_C5_CAMPEP_0188117594	MSQPVTVPIFGSNSSQNPQQAGEQQQEGSASGWYPPMDDGGDQDMDFDLLAEYLLEENPTVNQSEGVSFDFNNEFVVSPEQSIDGRGDSGAAKARDIITQHAATIATTVTSNPASAATTTVASTNQPQRLQQQQVMYAPVAAPPLLVAPSAPPQLAAQGMAVPRTITQYSSQPAMAPVPVMSYDGASTVRKTTTKAPKTGGATAEAKRRRINPPEVAAQGLINASYLTNPANMSPAVVAAAAAAAAMQGRGRKKTQAQIDRRRERNRILARRTRLRKKFFFESLQKEVMELQRDNAALRDIVRTEVEGEEGRKLLEQCNAARQLPREVLEACGGENPDLDTEDFNLITSIQQSQHSFVITDPSLQDNPIVFASEDFLTLTGYLKEDVLGRNCRFLQGEQ…
Fragilariopsis-kerguelensis-L26_C5_CAMPEP_0188121242	MSSGIQQPLFASASAQGQGDDFDLNEIFAEYFISEFENPVNAYTNAMGNYVATPGNTATTAAIENHPAAPTNTLTNTFAPAPTITVQQPLQQPGLSSGIRTAYHSAVAAPLAPTPVASVQRQQQQNQSMGGLPIAKKAKIEPGATTKLPVITTANVAATGGVTSRLGFNTENLQQGGTHIMPGGFHVNPASTATLAQQQQQHQQGSFGLHQQQGSGVALPVGRGIRLGGAGGVAPATAQKVPGMGGMIWGGPQVAGMSDQAVAERRQRNREHAKRSRVRKKFMLESLQEQVASLQRENQRLRILVQDNIPEHAQVIISECCTSSPLFADGVLSSSEQHTGEDESGEGKKASALVRSDFQLIDSLSAGQQNFVLSDPRLPDNPIVFATPGFYKLTGYTTE…
Grammatophora_oceanica_Strain_CCMP_410_CAMPEP_0194027730	MTTDNVQQPLFAPVSQGAQMGDDIDLNEIFADYFINEFEDPLNAYTSSMANYSGAAAAVALAQKQQQTNNNGIAPAPAQVAAPVAVAPAPTPTVMAPGTVTVAQVPSAAGAVPSPLVPTRIVPTQQAVTVTVQPMITAPTASGIKTPYHAGVVRAPAAPLIQVQGHPGTYVTTAPAPVMQIATAPGALAPAPVMHVAAPTATMQPATAHVLGGANGATHPGEPATKKAKQQVLAAPATVIVQHQAQVPNNVSKGGLSGRLGFQMVGGQLAVPQPNAPKPVAAVAPAVAHAKATGVALPVGVGIRLGGVGGVAPATAANAARPGQFMMWAGQQPVGGMSEQAIAERRQRNREHAKRSRVRKKFMLESLQEQVRALQKDNVELRMIIQEKIPNSAQKIISE…
Grammatophora_oceanica_Strain_CCMP_410_CAMPEP_0194042468	MSAPGLSASATAAVAQRGTPATLNLDDIFGDVLFTPEGETVFMSELQGEGGAAAGVLASGEKDGVASVASRMGADGQLMPVAKAGGIQTTQLDQKGKAALAMGAGESTMSVPFQRPPQQRHHLQYATPEMAAALKKRKAAGSKSERKMSEQQKVERRERNREHAKRSRIRKKFLLESLQQSVSLLKDENEKLRSAIRSHLGAAEADKLMNKHLEGEGGADAAGLIADSSMTANKVLDDPDFSFIKALQTAQQNFVVTDPSLPDNPIVYATQGFLNLTGYTLDQVLGRNCRFLQGPETDPKAVEKIRKSIEEGTDMSVCLLNYRVDGTTFWNQFFIAALRDASGNITNYVGVQCKVSDQYAANVCKKQEEADAAEAEEGS
Grammatophora_oceanica_Strain_CCMP_410_CAMPEP_0194042944	MIPVALPRFASATATSAQPANAAMGVPQTSTTTPAWVTEGNAEALDFDLLAEYLLDDTAAAAAGTSTGMPTFDFSVDSAPASGVVSPEQSDDGIAPEKPLPPPLQAPLATPVQPPVAPPQTHAVVAHAPAPVPVARAPIAHAPIARAQISQAPIARAQISQAPIARAPIAQAPIAQAPVMRVAPAPIQPVPAPAPPMVTRVAQPVAHAPVGLHPAQAPAAPYRATPMPTPVPARMPAQTVIVSHHGLQLPTPGVTVQRVAQMPPSNKRQRIAMPAPHATPMVMAIPGGAIVNGHMVPHPPVLPGRGRQKTQAQIDRRRERNRILARRTRLRKKFFFESLQKDVTDLQRENLALKELVRQHLPQEESKGILEGCKAMEQLPREVQEACGEVLDGMESRDF…
Guinardia_flaccida_RCC3093_CABOSW_20802_1	MPIFTGASQSSGQMFGNDIDIGDLFADYFISDLDQNNQNQLSALQIANAPVANPLLAPVAPAPPAFDLPTLTNPNETLDAPSQAPQPQNNQNGIYTNVTELPTRRGIKTAWHTGSLPNLQGGIFQVTGNILERQQQQQLKAQQAFAHLAKKVKPNDDRIVQNTSNSQNVLTTSVSSPVQSTQNAVSGGGDDKLKNATVSLSTGSAISGRLGFSMVGGQLSLPNRNAKVSIAGQSSTPESENSNLGMANASDSGGVSLPIGRGIRIGGQSGVVQQQIDATGNVTTSSVVPSSNWTSNSIWSSSGLMCVENGRGGLSEQVIAERRQRNREHAKRSRVRKKFLLESLQEQVRALQRENSGLRMLVYEVIPQHAHQIISECCKASPLFDDNINKSSGNKEVEL…
Guinardia_flaccida_RCC3093_CABOSW_20975_1	MATTNNPYPQAPRFTSNNPNGHGLPSLSTATANAIATRGTPATMNLDDIFGDCFFTPEGETVFLSDQPESDRQEYIASTESNPAYIASRVSDNGTAIPINQAGGIDTTNLNTPGQPALVMDNATQAPPHMATHLPAEAQQDHHMGYISAVNVAAMGGQATNVSGVVGAGAGVGNMNAGLSSGSVKDGRKTRRQRPGSERKMSEQQKTERRERNREHAKRSRIRKKFLLESLQQSVALLKEENEGLRSSIRTHLGEEQASQLLTKKNLEEQSESAAAAGLIASNANNANKVLDDPDFSFIKALQTAQQNFVVTDPSLPDNPIVYATQGFLNLTGYTLDQVLGRNCRFLQGPETDPKAVEKIRNSIEDGTDMSVCLLNYRVDGTTFWNQFFIAALRDAEGN…
Guinardia_flaccida_RCC3093_CABOSW_28495_1	MNETNTAEVPAAAPTSAPAAAPTSVPAPVPAPNPTSVPVIAAANATIAENATLQQEQANANSTQVGALSMFAQTNTNPVAGAENNGMTIDLDDLFHDCYFGDFSVSESIGNDSTTAEAPESQTPTPSTTSLLPSAQRNSFTPSSTTANVPPPVPSATYTPALTPATIMPQQQQQQQLTENLLKRKIPVVEPTPVSVLSSTPSYAHNTISTNNSTMYTYPPGFSTGTANSRQLTDQQKVERRNRNREHAKRSRLRKKFLLESLQEQIHGLQSEIEDLKSVIIKELPDRADAILEKINGKQGQFTPLPMPSGFGPVKTLMEPDFRLMSALSGSQQNFAISDPSLPDNPIVYVSQGFLDLTGYTLDQVLGRNCRFLQGPGTDQSAVDVIRKGVRQGVDTSVC…
Guinardia_flaccida_RCC3093_CABOSW_2894_1	MSIAISNMVPITMPRFVSASSSDRTLVQDAGGGAVIAQGLGHITPNRVTPPQRGDFGDNTLDFDLLAEYLLDDVNLPPLQDFGGQSNQNCSNSAESGFGNHNTVFGGNGNDNSTAFTQNQVALLAAAKADPLADAQAQMKHSHALVAAGSEVGRELQHVQQFIVHQANANVSVNPTNGKMQTQMTTIDHGKNFKPTMGAPVATNTTPFYGANNNMILNANKRRRTGQVVHAQQQKAPITAAIPNFNLNIPNPAAVLNNINTNGALTNMTPMQQRQKQKSQAQLARRRERNRILARRTRLRKKFFFESLQKEVMDLQKENAALRNIIKTNVPDLNTAKSILETCKKAELPPIVMEELGMSTGLDQQDFCLVKSLKTSQQSFVITDPSLQDNPIVYASDDF…
Helicotheca_tamensis_Strain_CCMP826_CAMPEP_0185734674	MSDPQNVFQNSGVQKPMFAPKHTQLGDDIDLNDIFADYFINELEDPLTSYANSVSKYSGAAAAVALAQQQQQAAALAAAAATPQTAGQAAPAPSLPTGRGIQTAWHSGALPNVSGTGALLQAQVDAQAPAAKKAKLQAPQDAMQGIAPQNHAQAAAPMEAPVGAPVAGSQNTGAASGLSGRLGFSMVGGQLALPQQGGAVQQQQQAGAPAAQGNVTLPVGMGIRVGGAGGVVPHGAAGGNATLSHTQWNAGAQQLSHVQHGQPPGQYLLWNGVAGGMSDQAVAERRQRNREHAKRSRVRKKFMLESLQEQVRGLQKENVHLRMLIQEKIPQHAQKIIDECCQKNSLFDETQTNGEKSEEPRELVRSDFSLIESLTSGQQNFVLSDPRLPDNPIVFASPG…
Helicotheca_tamensis_Strain_CCMP826_CAMPEP_0185735484	XSSLGGAGGGRGSAADRKLSEQQKVERREMVRERNREHAKRSRIRKKFLLESLQQSVALLKEENDKLKSSIRTHLGEEQAEELLNSQALAEATANASAGGLIAPNATDANKVLDDPDFSFIKALQTAQQNFVVTDPSLPDNPIVYATQGFLNLTGYTLDQVLGRNCRFLQGPETDPKAVEKIRRSIEDGSDMSVCLLNYRVDGTTFWNQFFIAALRDASGNITNYVGVQCKVSDQYAANVCKKQEEADAAEAAAQAEAAAAQGSSEVPIKEESQGSDALAGVPMNGSDAAEAPAAPLEAPAAPTPQDVSSSELAAVTTAPAPQG
Helicotheca_tamensis_Strain_CCMP826_CAMPEP_0185736892	XNGANSSVPPTSGIYPNALKGEPSKEAPAATAVEQAQKTQGALTMFAPSAPSAPSTEANANDAANSGDGVDLDDLFRDCYFGFSDPISSSDVTTHLTASAAVAPPPPTAAVPHVAVATAPVAAPVAPVAAPPVSVPLVAAAPDAVTSTPVSATIETPQTTAATALKRKAEVAGMGSAVAPLPVTSSATATSYVKRPADSKELTDQQKIERRERNREHAKRSRLRKKFLLESLQEQIHGLQTEIESLKDIIKKELPEKAESLIKTACGEEGNFTPLPMPSGFGPVKTLMEPDFRLMSALSGSQQNFAISDPSLPDNPIVYVSRGFLELTGYTLDQVLGRNCRFLQGPGTDQSAVDIIRRGVREGIDTSVCLLNYKEDGTPFWNQFFVAALRDAEGNVVNF…
Hemiaulus_sinensis_24i10-1A_GAUA01007359.1_1	LDRQDFNLIQSIQKSQQCFVITDPSLQDNPIVYASDDFLTLTGYAREDVLGRNCRFLQGTETSPAKVAQIRKALSVGEDVSVTFINYTADGTAFWNKLFIAALRDAQNNIVNFIGITVKV
Leptocylindrus_danicus_Strain_CCMP1856_CAMPEP_0196803300	MAMTMSSSNVTLPRFVSASTAGEGTSGALGEGDDMFSSLMNGDADFDLLAEYLLEDSGGAGGGAFGGGNAVLEIENTPSANATTVSVGASSNSDMEGLDADPLADAAAAAAAGSDVKTNGVSDLAMNLQQIQSMFANKKGQGSAAIDNKKASVKPQSKNLAPSSATTSLLATNGKRKHAETTAEVMPATIPMISAVPTSVDSSAVNNNRSQRQKSQAQIDRRRERNRILARRTRLRKKFFFESLQKEVTDLQRENTILKEIVRSKIRPPAKAMEVLEECKSKDEIPSIVFENVLGSNDIEKQDFSLVQSLQGSQQCFLITDPSLQDNPIVYASGGFLSLTGYTREEVLGRNCRFLQGKDTSPQKIEKLKKAVSLGQDVGVCLVNYTSDGTPFWNQVFIA…
Leptocylindrus_danicus_Strain_CCMP1856_CAMPEP_0196811592	XCSYTDRTVGGGRLCARIMSFDPSSQYCQYNQGVQQPVFASSNTNQQQPFGDDFDLNEIFADYFLDDVGAGQNAAARTSAANLPTGRGIQTAYHTTAGGEGAAWKKQKFSHGPNGGISNTAGSVSVNNVNNGGGVRAVTHPAIGGGGGTVQTQPQSSSTLTGRLGFQLQNKQHMAQTAYNPQAAAAAAAAQNVAGGVKPQHPGGLPVGVGIRVPGAMPNVGATPSATATAGGIQHNQWGRGGITLPPQAQMWQHAHGVDLNKPVSSAQEQAVAERRQRNREHAKRSRVRKKFMLESLQEQVRALQRENTSLRMIVQDKLPTLAQKIFEECCVTSQLFKDSHGPVDSGVGAKNADGLMKSDFNLIQSLASGQQNFVLSDPRLPDNPIVYASAGFYNLTGY…
Leptocylindrus_danicus_var._apora_Strain_B651_CAMPEP_0116056222	MTGSITIPRFVSASSNKTNTCTGKKDDVGDSDAQIFSSIINGDMDFDLLAEFLLDDGSDKGPSPVRSSGAIEKESEVSTVSVGASSASDIDEIHADPLADAFAAASNNEKDGKIHSAVNVLAKDLMQIESIFASEIAGKSTSSTVADTVKSSSKVKTEPTKGKRKISDSASMVVLPSMPVIPTSNMNATFNGMVGTNSRSQQRQKSQAQIDRRRERNRILARRTRLRKKYFFESLQKEVTDLQRENKALKNIIRTKVSPPTKAAQILMECKSKNEIPSIVYENVLGSNEMDKQDFSLVQSLQGSQQCFVITDPSLQDNPIVYASGGFLKLTGYSKEDVLGRNCRFLQGPDSCPQKIQLLKKAVMNGEDTGVCLANYTSDGTPFWNQVFIAALRDAHNNV…
Leptocylindrus_danicus_var._apora_Strain_B651_CAMPEP_0116059842	XATTSDAVNGVASGSTNNLSALNMFANSNKEAGEGDVSQLDLDELFRDCYFGEFPVPVMSGDVSTGPPPPGLSSSLSLTASSPPPPSISNNSSNSLKRKADSVLETSDKMVVKKPPSAASVLPLIDVTPKIAAPIAAPTSLPQATISTNLTSVSTKVLTAAQKVERRERNREHAKRSRLRKKFLLESLQGQIHGLQAEIEALTNIIRTELPDKADKLLNTVYEKPNVAGADKFTPLPMPSGFGPVKTLMEPDFRLMSALSSSQQNFAISDPSLPDNPIVYVSQGFLDLTGYTLDQVLGRNCRFLQGPGTDQSAVDIIRKGVRDGVDTSVCLLNYKSDGTPFWNQFFVAALRDAENNVVNFVGVQCEVSKATVEKQMKK
Leptocylindrus_danicus_var._apora_Strain_B651_CAMPEP_0116063382	KYPKFNSSREAIQMSFDHLGRVQQPVFASNNSNNQGTFTEDFDLNEIFADYFIDEFSSLNPTPAPAPIAAPALNHPAATTNLPTGRGIQTPYHVNTNITSVPNNTITSKAHVDPIFKKQKYAHENVPQSSSALTGRLGFTMSGQVVQNISSTVGGVSNSQLPRLRDPMESQNVVNLPVGVGVRVPTAVQNQAKAASVMANSSAVKHNRNSGGIKHSQWGKGGITLSTHNPMEVMNPTAVAGLYFPSGATGLPQGVDLAKFASAAATMNINSADNAMAERRQRNREHAKRSRIRKKFMLESLQEDVRKLQKENTELRMIIQDKLPNVSQKIFDECCVSSSLFKDEKALGGQVNADDNLLRSDFSLIQSLATSQQNFVLSDPRLPDNPIVYASQGFYDLTG…
Leptocylindrus_danicus_var._apora_Strain_B651_CAMPEP_0116075458	MNTSNTNTNNTNTNQVPPLSAAAQAALESRSHINLDDIFGDCFFTPEGETIFLNDTTDSVRSNALTSSETEPAPVASKENQQTGTMNPVAVNVPPLGTTNTGSTLRGEGYSSAANPALTTADRANRINAMSGQQPNHMKFISTLSAGSSAEAVEKKRKVGGGAVNLVGAVGGGSRPVDRHQKMSEQQKVERRERNREHAKRSRIRKKFLLESLQQSVKILKDENDKLRNAIRSNLPAEEAEEAISAKNLASESIIADGSTTANKVLDDPDFRFIKALQTAQQNFVVTDPSLPDNPIVYATQGFLNLTGYSLDQVLGRNCRFLQGPETDPKAVEKIRNAIETGNDMSVCLLNYRVDGTTFWNQFFIAALRDANSNITNYVGVQCKVSDQYAANVCKKQEE…
Leptocylindrus_danicus_var._danicus_Strain_B650_CAMPEP_0116019556	MTSEANGKADNGVPGXALNMFANSNLSAGDGEVSQIDLDELFRDCYFGQDASFPSAVPSDSGIDLVPPPPSVPASAASTPAAGGGVKRKAETQDVVKPEIGIMPSVSMYGDAGKIPSGSTKTLTAAQKVERRERNREHAKRSRLRKKFLLESLQGQIHGLQSEIEALTNIIRKELPDKADELLSTVNEKPKVAGAEKFTPLPMPSGFGPVKTLMEPDFRLMSALSSSQQNFAISDPSLPDNPIVYVSQGFLDLTGYTLDQVLGRNCRFLQGPGTDQSAVDIIRKGVREGVDTSVCLLNYKADGTPFWNQFFVAALRDAENNVVNFVGVQCEVSKATVERQTGAISK
Leptocylindrus_danicus_var._danicus_Strain_B650_CAMPEP_0116030574	MADEIPPLSAAAQAALESRPQINLDDIFGDCFFTPEGETVFLNDTSESERNAVLPSAEQQPTSIASKLDPSKGNFVPVPVNAPPLGQTTTGSTLKGVGFTSGGTSVSQQPPRIPAAQQQPMHHMNFISRVDNKKSTSSSAMTSLSGSAGRMNERKMSEQQKVERRERNREHAKRSRIRKKFLLESLQQSVAILKEENEKLRQSIRTNLPEEEANDLLSAKNFTEEGGLIADSSTSANKVLDDPDFRFIKALQTAQQNFVVTDPSLPDNPIVYATQGFLNLTGYTLDQVLGRNCRFLQGPETDPKSVEKIRKAVETGNDMSVCLLNYRVDGTTFWNQFFIAALRDANGNITNYVGVQCKVSDQYAANVLKKQEEGVKSYEDEDMEEDGPLDDPVNSTDTG…
Licmophora_paradoxa_Strain_CCMP2313_CAMPEP_0202441950	XQDQPQQPQQQQPQQLQQSAQIVPTATATATAPTATVVPTAVVPPTPTPTPASVIPMFAPSDPTTANTTSAVDLDDLFRDCYFGDLPVQPYGAGVSASGAPLQTSMPPPPPVDVTGATGTGSGIVVNSNSNSTNHNMNINTNTNANMTMNNHVHVPTLTTTPALLPPVTISSTPSTTAAAAAPVHLSASVPHNDHVNTINNSNKRTAEEADLIESSSADFGGKSSKQLTDQQKVERRERNREHAKRSRLRKKFLLESLQEQIHGLQGEIEILTNVIKKELPDKADAILQKLSGDREKFTPLPMPSGFGPVKTLMEPDFRLMTALSGSQQNFAISDPSLPDNPIVYVSQGFLDLTGYTLDQVLGRNCRFLQGPGTDQSAVDVIRRGIREGVDTSVCLLNY…
Licmophora_paradoxa_Strain_CCMP2313_CAMPEP_0202455990	MQPVTLPRFGNADPSGTQTGAPQSAAHTGAWSGDHHQTSDPLDFDLLAEYLLDDGNALPGTSMSGLPQFDFSVEPGMNSGVVSPEQSEDGLPIPETTNVAHAPTASMPAPAYAPPMMHVSVSHPPAPVPAPAAVQHVPVHVHHSIPGAPLPAPAMAPGVAMAPSAPAPHTMAPAPLAVAPAPMPPSGTIVTSVHGTHMLHHSRPMLAATAPPNYLQVTADTRAPGAPVPAMTVQTHVAPAPAMTVQTHVAPAPAMTVQTHVAPAPAMAQAPMVVHQHPGAASLGNKRRRTDGAVQVMAGVTAANQLTAHSRGRQKSQAQIDRRRERNRILARRTRLRKKFFFESLQKEVMDLQRENLRLKDLVKTKLDPEVSKKLLSECKALEQLPSAVAEACGDVLQG…
Licmophora_paradoxa_Strain_CCMP2313_CAMPEP_0202458464	MSAPIYTNATASAVSQRGTPATLNLDDIFGDVLFTPDGDTVFLSDLPPEEAAEVVGSGEGPQVASRASRVTEDGRAVPVQNAGGVHTTNLNDPSKRALVMGGSEIAPQPAKPVPYKRAPQQRHHLQYATPEMMASLKKKKKSERNMSEAQKSERRERNREHAKRSRIRKKFLLESLQQSVSLLKEENEKLKQSIRAHLGQQEADQLLQAKGVDPGIVANNQMDANKVLDDPDFSFIKALQTAQQNFVVTDPSLPDNPIVYATQGFLNLTGYTLDQVLGRNCRFLQGPETDPKAVEKIRKSIEDGTDMSVCLLNYRVDGTTFWNQFFIAALRDSAGNITNYVGVQCKVSDQYAANVCKKQDDPEEEDD
Licmophora_paradoxa_Strain_CCMP2313_CAMPEP_0202478032	MSGNAMPNSVQQPLFAPATQGSTLGDDIDLNEIFADYFISEFDDPLNAYTSSMANYSGAAAAVALAQKQQQVDAAAATSTTPAASLALPGVAITAPTPQTKPAPTPAPIAAPTPSGNSLPTGGIKTAFHSGVAQQQQHQQQQQYHHQNGNLTGEPATKRLKESVSPAGAPLYATAPVGPATAAAGLAPATNAPISKGAISGRLGFSVVAGQIKQAQPMTVARQPAAATGVALPVGVGIRLGGVGGVAPATAQLGPRGLHAPWGINSAGALSDKAVAERRQRNREHAKRSRVRKKFMLESLQGQVRELQKENLELRMLIQEKIPQHAQQIISECCGKNSLFADPDAIMTDADGEKKKETALVKSDFSLIESLTSGQQNFVLSDPRLPDNPIVYASPGFYD…
Minidiscus_sp_RCC1721_CAGOSW_3125_1	MATDNQNQNNIRPPQFVAASAPGLSANASSAVQSRGTPSTLNLDDIFGDCFFTPEGEAIFLSENPQLQQQAQQQQQLSQQQQNLQSALLASGEANPTQNASRPTAAPGSYAPVPQAGGIVTTGLHKPKASATTMGTGAAPPAVPFAQAPQRPHHLQYAYVQAGSSSGTAGVATGAKRGRAPAPAMAKTDAQQSKADRTKLVKERNREHAKRSRIRKKFLLESLQQSVALLKEENEKLKAAIRGHLGDQEADALLSKQALADAAGAGGGLIANNSADANKVLDDPDFSFIKALQTAQQNFVVTDPSLPDNPIVYATQGFLNLTGYTLDQVLGRNCRFLQGPETDPKAVEKIRNSIEDGSDMSVCLLNYRVDGSTFWNQFFIAALRDAGGNITNYVGVQCK…
Minidiscus_sp_RCC1721_CAGOSW_7556_1	MAPGAVAIPQYTNATHDKKEGDWNMDSALDFDLLAEYLLEDVGAGGFDFSNPDVATSPNLDEQQQQAVSSLPTHDPGVVTPNGSTHTYIDPLNEHHAQLPKQPRVSTTHQGYQNNAAPAPATTSDPLPISGDMSGELSQVQKITMEMVAHQQQQQQANNLQLAAAAASAIQPLLPNNSNTVQAKTTAVQQQTTQPKPPQAASITTQPRQAAAAQTLLAQNMAAAAQQPPPSKRPRVNAAAPVTAKGATYSFASRSSVQQNTASAVAMSTLGPEGKKSQAQIDRRRERNRILARRTRLRKKFFFESLQKDVADLQRENAALKSIVRSRLKPDDARAILTQCNANERLPSSVHSAEIAKASSAIPQGMGALSGATTAAPKKLDREDFSLIQSIQNSQQCFI…
Minidiscus_sp_RCC1721_CAGOSW_87991_1	MDPDNGLLEPASIDATNNNGTSTNNDNASAMQLFAPDPNGGENEPLDLDELFHDCYFGDFGVPEDVTSAAVTTSIMPIPPSAPAVKRTAEQAGLSSSAPARGASATKQSKPTSTAAAATSSSLSISTKPAASLTNAQKIERRERNREHAKRSRLRKKFLLESLQEQIEGLQSEIHTLKSIIRTELPDKASSLLKGLCDDDGSDSRDPSQPKKGSYEPVPLPSGFGPVKTLMEPDYRLMSALSGSQQNFAISDPSLPDNPIVYVSQGFLDLTGYSLDQVLGRNCRFLQGPGTDQAAVDVIRKGVREGTDTSVCLLNYKADGTPFWNQFFVAALRDAENNVVNFVGVQCEVSKAVVEKHISEGKTPASSMPK
Minidiscus_sp_RCC1721_CAGOSW_88584_1	MSNNFLQNMGMQMPMFTGANQQSNDDVDLHDIFADYLAETDLAPQFDQQTQQQQQQFTNLQTAQQQQFELAANAVAAEFQAQQQQQLSLPTGGIKTSWHSGGLPNMHQGGGDGQAEPQPKRSRGEDLYLPTGQQQHQVQQQQQQQNNGFNMGAIGGGVTQQQLALAQAASGVGGLSNRLGFTLPNMNNNSGTVDISNLIGQQQNQQGAVNSSTQQTTLPIGMGLKFGAGGQVIMTDSMNVNNNMNNASANGASALATSQQARLMNQQQPNIAVSNMKYTTPSNTISQLGMSKKEIEAQMAEERRLRNREHSKRSRVREKFMLESLQQQVRGLQDENSTLRQLVQTYIPQSALQIIDECCSKSVLFXXXXXXXXXXXXXXXXXGAGAVPQDPAKETPLLK…
Minutocellus_polymorphus_Strain_CCMP3303_CAMPEP_0197724462	XRHHLQYATPAMLGGARTMPAGGAKRTTSTGVSVGVRSDRKMSDKQKVERRERNREHAKRSRIRKKFLLESLQQSVALLKDENDKLRGSIREHLGPEAEELLKKENLAEAAAGGGGGLIAGSSSDANKVLDDPDFSFIKALQTAQQNFVVTDPSLPDNPIVYATQGFLNLTGYTLDQVLGRNCRFLQGPETDPKAVEKIRNAIEEGSDMSVCLLNYRVDGTTFWNQFFIAALRDAAGNITNYVGVQCKVSDQYAANVCKRQEEADHAIVHQEGDAPAAAPQAQAVAPGADGVPAAAASPAVASAPPVAS
Minutocellus_polymorphus_Strain_CCMP3303_CAMPEP_0197734028	AISGMAHSSLSALPFQKGGRHKSQAQIDRRRERNRILARRTRLRKKFFFESLQKDVTDLQRENALLKELVRNRLQPDVAGSILEQCKANEEMPSIVSEQGHGILDQRDHNFMQSVQKSQQCFVITDPSLQDNPIVYASDDFLTLTGYSREEVLGRNCRFLQGSETSRSKIAQIRKTLENGDDCSVTLINYAADGTAFWNNLFIAALRDAENXXXXXXXXXXXXXXRDAENNIVNFIGVIVKVAGPDPGDAEHGVQLPGENSPTSAMDPDALGSAIDADAVAKAAEGTLMGLEGAVTAAVAAAPSLAK
Minutocellus_polymorphus_Strain_NH13_CAMPEP_0181032216	MSGFQQPLFAPAQGGKSGEPDLDLNDLFADYFVNELEDPLRTFNQTVTAAMLPIDAATTHHQLHQQAAAVAGSVGGNGAALPTGRGIQTAFHNTNNFALAAAADPGMAATAAAVAGMGVPGMGSSATYPQQAQEPAPKKSKMEQSLATGGGVSSRLGFPMHPPGQQQQQAAMGGAGVGFGVGGGLAQQQHHQQQVSLPVGVGIRIGGTGGVAAGTGGMTMTHTQWGASSGGGGGGVGLSHVQHGAQQGAAGIGIGAGAAGMAGVGAYGMMGAHAGLIGASSAXGGPMSDQAVAERRQRNREHAKRSRVRKKFMLESLQQDVLNLQKENEVLRQIIQAKVPEHAQRIIDECCQKSPLFDDDAKSPIHDVKIDNQDTKELVKSDFSLISSLTTGQQNFVLS…
Minutocellus_polymorphus_Strain_NH13_CAMPEP_0181033636	XGKQSFVLTDPRLPDNPIVYCSDSFCELTGYTRMEVVGRNCRFLQAPETDPSAVQHVRKAIESGSDCTTVMLNAKADGTPFWNRFFIAPLLDRRGRVVNYVGVQTETENPTESDGCTGVDIVENEKAGSTKKTKQLNIKRIPDSTTRTAIGTDVEPAVEPVPFFCDPQSPDDEELGDIDWVGLAEALEKDYLEATEEXPRAPKEWGSSWISKMGXGDESACANQDAAMSASRYVQLPRLFTAKVVRSEVINALLSSYGDVTDSRFVAALDVLSSFYKSSRIDVSDRDRYHELMNGSWRSLSRPAFQGCLGMKSEGSFVYELGTMSFGMFRPAXIQCAIQNTLTRISPATTPSDGSPTIVPWSLRRELAVLNNGEXVPNGNISGQNYSMLKTYDIAMSLL…
Minutocellus_polymorphus_Strain_NH13_CAMPEP_0181037488	MAANGEGMEKEAEHPSAMSLFAPATQAADDADNEENALDLDELFRDCYFGDFPIPGGDAGDAGYPIGGEAAPPPPAKRKAEEMTAASKPMYATTGGVTAASAAGTSASSDDAEVPEAAPIKSTTSGGGGGGAGGKPELTEAQKIERRERNREHAKRSRLRKKFLLESLQEQIHGLQGEIATLKNIIKSELPDRAEELLKKVGSGEASEFTPVPTPSGFGPVKTLMEPDFRLMKALSGSQQNFAISDPSLPDNPIVYVSQGFLDLTGYTLDQVLGRNCRFLQGPGTDQAAVDIIRKGIREGIDTSVCLLNYKADGTPFWNQFFVAALRDAENNVVNFVGVQCEVSKAVVDQQIKEGKMPAPVGGTSVTK
Minutocellus_polymorphus_Strain_RCC2270_CAMPEP_0185810608	MSGFQQPLFAPAQGGKSGEPDLDLNELFADYFVNELEDPLRTFNHSVTAAMFPGDAVATQQQLQQQVGISNGASLPTGRGIQTAFHNTNNYALAAADPGMAATAAAVADMGVPGMAGPSGATAAYMQEPAPKKSKMEQSLASGGGVTSGRLGYPMGQQQQQQAAMGAQQSQQMQHHQHSQQQVALPVGVGIRIGGSGGVATGTGGMNMTHTQWGASGGGGGVGVGLSHVQHGAQQTAAGAVGMGAYAGLMGASTAFGGPMSEQAVAERRQRNREHAKRSRVRKKFMLESLQQDVRNLQKENEVLRQIVQAKIPEHAQEIIDTCCQKSPLFDDDAKSPIHDVKINKDDTKELVKSDFSLISSLTTGQQNFVLSDPRLPDNPIVYASQGFYELTGYTREQV…
Minutocellus_polymorphus_Strain_RCC2270_CAMPEP_0185811248	MAANGDGEEKGAEHPSAMSLFAPATQAADDADGEENALDLDELFRDCYFGDFPMPGGGAGDAGLPIGEAAPPAKRKAEEMTAASKPMYATTGGVTAASAAGASTSPADAEDLEPNAVGPGGKPELTEAQKIERRERNREHAKRSRLRKKFLLESLQEQIHGLQGEIATLKNIIKSELPDRAEELLKKVGSGDGSEFTPVPTPSGFGPVKTLMEPDFRLMKALSGSQQNFAISDPSLPDNPIVYVSQGFLDLTGYTLDQVLGRNCRFLQGPGTDQAAVDIIRKGIREGIDTSVCLLNYRADGTPFWNQFFVAALRDAENNVVNFVGVQCEVSKAVVDQQIKEGKMPAPVSGVTTTT
Navicula_sp_RCC3092_CADOSW_10027_1	MATNFSYIGHPLFAPASQQQQQQQQQQQQVQVQVQQLQAAQAQAAVQQPTQQPGGDDFDLNEIFADYFTSEFEDPLNAYTGGMASYGQAGGGASLPTGGIKTPFHLGTTAAQAHAAALAQQQQAAAGGPPMKKAKHDPTMAMVAQQHATNGGVSLPVGVGIQIGGLSGVAPQTAQMAAAHASGQMWDQNFAGMSEQAIAERRQRNREHAKRSRVRKKFMLESLQGEVLQLQKENENLRLLVQTHLPNDAQEIISECCTTNPLFADGAGEDPAEAAEKAQQLEKSDFTLMESLSGSQQNFVLSDPRLPDNPIVFASPGFYKLTGYTSKEVLGRNCRFLQGPGTDSRAVEVIRKAIQTGADTTVCILNYKADGTPFWNQFFLASLRDSENNIVNFVGVQCE…
Navicula_sp_RCC3092_CADOSW_1187_1	MSGPNNVNPPLFASAGNKSSGNAPGDPPAWLMEGSDPLDVDLLAEYLLDDAKPAPNGMTFDFSIENGTNSSVVSPEQSEDGAFPPVAEGNNHQHQQHAAHPPPPHGAPQPAVNPPHQPQGQLHPPAPVPAPHVTGMAAPPSMPSGVPVAPAPPSYTPAPAPIYAPVPAPLVYAPAPAPPVYAPAPAPPVYAPAPGGYAPAPPQPVVLAPARPMVAPINGAQHMVVHQHVNYAKRQRVEAPAPVAVPGVSPIPSAPPTSSIVAGGQQLVDAAAAAMQGGRGRKKSQAQIDRRRERNRILARRTRLRKKFFFESLQKEVMDLQRQNTALKDLVKSKFSMEESRKVLETCKAAEKLPESVVEACGEHAAEMEQQDFNLVRSVQQSQHSFIITDPCLQDNPIV…
Navicula_sp_RCC3092_CADOSW_14979_1	MTEYESITSTLKCFFWGDGGLKRRREDDLAPNPLMVVPAPTPVTSNAPAPAPVNDPLAGVSAPNPLAQFYQYQQPANKKVKLAVPLQPNCVSPTTSGGTAWAAVAPAAPMPAVAAIAPGPVISAPAPMPVAPVISAMPVTGVNISHQQAKLAIGVAPLAAPSQPAWAPPAIWSGCRPNGGAPASAVQVQGDRRERNKEHAKNSRIRKKQQEDALQHDLEQLQKENASLKRLIKTELPDAAADIIGQDCYNVAPNHSFPNQDVTTNTSPTTMGRNDFELIESLTREHHSFVLTDPRLPDNPIVYASPX
Navicula_sp_RCC3092_CADOSW_2597_1	XDVAARGLDIPNVEMVINYTFPLTIEDYVHRIGRTGRAGKTGASHTFFQPGDKSHAGELQQVMKQAGQAVPEELMKFGSTIKKKEHKLNRNHHRKQQPRPDFRXPFTQLNLPSLTXLAINMSMPLYTTAGQPMSAQAAAAVAQRGTPSTLNLDDIFGDVMFTPDGETVFLSEQQDPSANVLQSGEGGNVHIVAAKQQGGQYVPVPAGGGLETTNLHDPSKPALVMGMAPAATVPTAQAVPFTKAPQERHHLQYAAPKRKRSSRSDRKMSEQQKSDRRERNREHAKRSRIRKKFLLESLQQSVSLLKEENDKLKNSIKTRLGTEQGDKLIVEYVKGDGAAGADGLLAGNGGMANKVLDDPDFSFIKALQTAQQNFVVTDPSLPDNPIVYASQGFLNLTGY…
Navicula_sp_RCC3092_CADOSW_44360_1	MAALNLDDIFSDVMFTPEGDTVFLSEEKDEDMLNSGEGEDVKIVASKKNGDQFQAVNAGGGLDTTNLADPSKEALTMGEAAVKAVPTKQAVPFKEAPQKKNQLEYAAPKKKKKKGDKKSKEDAKKSRIRKKFLLESLQQSVGLLKEENEKLRNAIKSNLGVDQAEKLFRQKGGAGDDGLAASTQGIANKVLDDPDFSFIKALQTAQQNFVVTDPSLPDNPIVYASQGFLNLTGYSLDQILGRNCRFLQGPETDPKAVEHIRKAIEQGNDMSVCLLNYRVDGTTFWNQFFIAALRDASGTVTNFVGVQCKVSDQYAATVTKQQEEEDNA
Navicula_sp_RCC3092_CADOSW_775_1	MGASSQKSTGCEFFLLIPSHTHPLEGRSLNPPTLVPLLMICATLLNRCISNPFVLVFTIRLQPGGDDFDLNEIFADYFTSEFEDPLNAYTGGMASYGQAGGGASLPTGGIKTPFHLGTTAAQAHAAALAQQQQAAAGGPPMKKAKHDPTMAMVAQQHATNGGVSLPVGVGIQIGGLSGVAPQTAQMAAAHASGQMWDQNFAGMSEQAIAERRQRNREHAKRSRVRKKFMLESLQGEVLQLQKENENLRLLVQTHLPNDAQEIISECCTTNPLFADGAGEDPAEAAEKAQQLEKSDFTLMESLSGSQQNFVLSDPRLPDNPIVFASPGFYKLTGYTSKEVLGRNCRFLQGPGTDSRAVEVIRKAIQTGADTTVCILNYKADGTPFWNQFFLASLRDSENN…
Navicula_sp_RCC3092_CADOSW_8934_1	MATQLPGSEDVNPTPMFQMSNAVGYSXVEMIACVCFLDDXNLTLTLQTGNANLDFNVDLDDIFSECYYLDLPPEQNPQAQAAVGQPAPPAPAVAAAPAPIPAVAVAAVPAPVQSDPAPAAVAPVKRTAAEAGIGAKFEPTPKAVKSTSAGTNNNGEELTEQQKLERRERNREHAKRSRLRKKFLLESLQEQIHGLQEQIESFKGVVKEYAPTQADDIITRICGNKEKFTPLPTPSGFGPVKTLMEPDFRLMSALSGSQQNFAISDPTLPDNPIVYVSQGFLELTGYTLDQVLGRNCRFLQGPGTDQSAVEVIRKGIKEGVDTSVCLLNYKADGTPFWNQFFVAALRDAENNVVNFVGVQCEVSKAVVEKHMGEGKKNA
Navicula_sp_RCC3092_CADOSW_89634_1	MTEYESITSTLKSFFWGDGGLKRRREDDLAPNPLMVVPAPTPVTSNAPAPAPVNDPLAGVSAPNPLAQFYQYQQPANKKVKLAVPLQPNCVSPTTSGGTAWAAVAPAAPMPAVAAIAPGPVISAPAPMPVAPVISAMPVTGVNISHQQAKLAIGVAPLAAPSQPAWAPPAVWSGCRPSAVQVQGDRRERNKEHAKNSRIRKKQQEDALQHDLEQLQKENASLKKLIKTELPDAAADIIGQDCYNVAPNHSFPGNDAIATTSPTTMGRNDFELIESLTREHHSFVLTDPRLPDNPIVYASPTFCQLTGYQRDQVIGRNCRFLQGPQTSPQATQAIRQAIKTGSDCTVRMINVKQDGTPFWNQFFLAALHDKHSRIVNFVGVQSEVESPSEEELEKMQQCI…
Naviculaceae_X_sp_RCC2677_CAFOSW_1486_1	MSNEVQRPVFASASGQQGDDFDLNEIFADYFISEFEDPHNAYTNAMANYVVGTPAAPAGPASAAVAAAAAGVPVAAAPPAATMTLPGQPLAAAPGVGAPLPTSGIRTAYHTAVVAPPQAPTQQQILAPAPVAKKPKIELGTFPTATVAATGGITSRLGVPMPLLQQNGTAPGTQAAISQLSAAAAAAAVQGVAPAVVAGPGGGVSLPVGVGIRLGGAGGVAPSTAQNAARVGGIMWGGPQVVGMTDQAIAERRQRNREHAKRSRVRKKFMLESLQEQVSALQRENQRLRLVVQDNIPQHAQKIIAECCTSSPLFSDEVQEKTSTVEVEGVTKDATALVRSDFQLMDSLSAGQQNFVLSDPRLPDNPIVFATPGFYKLTGYTPEQVLGRNCRFLQGPGTD…
Naviculaceae_X_sp_RCC2677_CAFOSW_76361_1	MSSAEDSSNPLPMFQMSNPDAGSVSAGNSLAGGIGGLGGGGNTDFNLDLEELFVDCYYDTPGLSSMANNVAANGGEAVPTTAATTSPTTAATASSTATADAPTAAATTKPAAVKSSSSGTKRGADEIDVKGDAAGAASSTGELTMKQKLERRERNREHAKRSRLRKKFLLESLQEQIAGLQEQMEALKDAMRKEVTTPGRADQIIDQICGNANKYTPLPMPSGFGPVKTLMEPDFRLMSALSGSQQNFAISAPTLPDNPIVYVSQGFLDLTGYQLDQVLGRNCRFLQGPGTDQSAVDVIRKGIAEGIDTSVCLLNYKADGTPFWNQFFVAALRDAENNVVNYVGVQCEVSKAVVEKHMGAGSTEVKGK
Nitzschia_punctata_Strain_CCMP561_CAMPEP_0199319612	MSTPSNNNNNNTNAAGEPLPMFQMSNPDAASATNSYGADMGQLDLDDLFADFYYDVPGLPSATTAATASTTAAPVAAASAPPGQVTSAPAPASSSRKRPAKEMNDTTTNQNDNDPDEATLTEKQKIERRERNREHAKRSRLRKKFLLESLQEQIHGLQEQIDRFKDALKREVAPDRAEAIIDNICGNQKKYTPLPMPSGFGPVKTLMEPDFRLMSALSGSQQNFAISDPTLPDNPIVYVSQGFLDLTGYQLDQVLGRNCRFLQGPGTDQSAVDVIRKGIAEGIDTSVCLLNYKADGTPFWNQFFVAALRDAENNVVNYVGVQCEVSKAVVEKHMGGK
Nitzschia_punctata_Strain_CCMP561_CAMPEP_0199319794	MPIFGSSGSSSQQAQNGSQRQQPHGASFPSDWHQDHLDHGAPDHDMDFDLLAEYLLEDNPSNELASGMTFDFNATSGTGSSSVVSPEQNIDGLGDLGAAHARQIVTDHATTNNNNGNNTSHPHNVVYAPGVAAPPAGLPVPQLAAQGINVPTPIPQFVSHPPSAPSSGGGAMIAPTGGISGVNIAKPPAAKRRRSDKTGAAAAPVAAAGLSPPVLADPAAVAAALQGRGRKKTQAQIDRRRERNRILARRTRLRKKFFFESLQKEVMDLQRENAALKEIVRSQVDDEEGRQLLEECDASEKLPQAVVEACGELATDMDQQDFNLIKSIQQSQHSFVITDPSLQDNPIVFASDDFLSLTGYSREDVLGRNCRFLQGSETSKEKIDEIRKGLATGDDVSVT…
Nitzschia_punctata_Strain_CCMP561_CAMPEP_0199334278	MTDLFSPGFAASIKSFFWSGTGVQESSNNDTTIANATKDNKGDFVTTPGIATGFPTQPQLAGYQQQQQQQQQQQQQQQQQLLPVFQQQQPFAAVYPPQPQQTSYHQQQQQPVYQYTSQQQPVYQQQQPQQQNQLQPSYQTQQQQPASQYQQQSQPQQNINLKRHAPINSVSLGGMSPCVAPLPIPSVISETRATIFPNNFAGLHLQAQDQPPAKRVRTEPTAMTPDVNVSSSASMFATAPTSAAAALAIEPRPLPLAPSKDATMGPLDINQKWQGEIASAAGMAGTSRTDMKKPVRESQVRKQRNREHAKRSREKKKNELETLQAEMEALQDENEALRTLVKKELPSEAAAIISQACYRGADLPVHLKMAESQQQQQQSQRAVFGASDFELLESLTKEQ…
Nitzschia_punctata_Strain_CCMP561_CAMPEP_0199348350	MSNDIQRPMFASASAQGQSDDFDLNEIFADYFISEFEDPHNAYTNAMANYGSTVAAPSPFATQQQQQQQQPATAAVAAMGGGQQQDLRTSYHNAMAAALAPPPAQNYQHQQEQQQQIPPAKKPKMATVAATGGVTSRLGVPMPLMQGQNGGAPPQPALGSGGITLPAGHQTAVGTPNVPLPVGVGIRLGGAGGVAPATAQNANRMGGVLWGGPQMVGMSDHAIAERRQRNREHAKRSRVRKKFMLESLQEQVSSLQRENQRLRLLVQDNIPEHAQQIIAECCTSSPLFSDDEKARLQPSIEGEAADSKKATALVRSDFQLMDSLSAGQQNFVLSDPRLPDNPIVFATPGFYKLTGYTPEQVLGRNCRFLQGPGTDPKTVDIIRKAIATGSDCTVCILNY…
Nitzschia_sp._CAMPEP_0113458500	MSNEIQRPVFASASGQQNDDFDLNEIFADYFISEFEDPHNAYTNAMANYAVAAPAGPASAAVQQQYVGGGGVPQQQPMGGAPMAAVGAPGSLPTSGIRTAYYNASGAPPQQQVIYGAAPTQQQQQQAPGPMGAAPAPKRAKYDFGALPTATVAASGGITSRLGVPMPLLQQQNGGVPGSQAAISQLSAAAAAAGAPTHPGPGGGVSLPVGVGIRLGGAGGVAPSTAQNAARVGGIVWGGPQMLGLTDQAVAERRQRNREHAKRSRVRKKFMLESLQEQVSSLQRENQRLRLIVQDNIPQHAQKIIADCCTSSPLFSDEAKELNKSTIEVDGVMKDAGVLVKSDFQLMGSLTTGQQNFVLSDPRLPDNPIVFATPGFYKLTGYTPEQVLGRNCRFLQGPG…
Nitzschia_sp._CAMPEP_0113460060	MASLNLDDIFGDVMFTPDGDTVFMSEEQDALASGEARVTTMATKADGRKSKKGGGLYTTQLYDNQKPALVMGSSADTSRKTEAVPFKKAPQERHHLQYAMPKKKSSRSSDRKMTDAQKSDRRERNREHAKRSRIRKKFLLESLQQSVALLKEENEKLRNSIRDHLGYDKAERLINPETEEQSNEAVLITNSQGAANKVLDDPDFSFIKALQTAQQNFVVTDPSLPDNPIVYASQGFLNLTGYSLDQILGRNCRFLQGPETDPKAVERIRNAIEAGNDLSVCLLNYRVDGTTFWNQFFIAALRDASGNITNFVGVQCKVSDTYAASVIKEQEREDEE
Nitzschia_sp._CAMPEP_0113461868	MSDSNNNANNPLPMFQMSSSELGGGSGGTGGGGGGGSISAGNSLAGGFPGLNNMGGGGGGGFDLDLEELFVDCYYDTPGLSSMANNQAANGGQGVPAAAAPATATTAPAAAAAKKTTSSASGTKRPAADANLDLDHDDDDQLDGDSKPAAELTMKQKIERRERNREHAKRSRLRKKFLLESLQEQIAGLQEQMDRLKQAMRSEIPGPGRADQLIDDICGNQSKYTPLPMPSGFGPVKTLMEPDFRLMSALSGSQQNFAISDPTLPDNPIVYVSQGFLDLTGYQLDQVLGRNCRFLQGPGTDQSAVDVIRKGIAEGIDTSVCLLNYKADGTPFWNQFFVAALRDAENNVVNYVGVQCEVSKAVVEKHMGPGSTDVKGK
Nitzschia_sp._CAMPEP_0113462760	MSDSNNNNNNNPLPMFQMSSSELTGGGGRGTGGGGSMSAGNSLAGGLPGMGIGMGGMGGSSGFDLDLEELFVDCYYDTPGLSSMANNQAANGGQGVPTTTTTTTAAPAAASTKKSSSSSSSSARGTKRPASSDAAGGGGGGEDNDDDLDLDSKPASELTMKQKIERRERNREHAKRSRLRKKFLLESLQEQIAGLQEQMDRLKQAMRSEIPGQGRADKLIDDICGSSTKYTPLPMPSGFGPVKTLMEPDFRLMSALSGSQQNFAISDPTLPDNPIVYVSQGFLDLTGYQLDQVLGRNCRFLQGPGTDQSAVDVIRKGITEGIDTSVCLLNYKADGTPFWNQFFVAALRDAENNVVNYVGVQCEVSKAVVEKHMGPVGSTSDVKGK
Nitzschia_sp._CAMPEP_0113484012	MSSSHRVPASSVTIPIFQSASSAAADAGVTAAAAAPPPSQSDWGSLYQSANDPMDFDLLAEYLLEENPSGLPGDENFDFSPDSANGSVISPEQSIDGILSGGDGNGIAQAQQIITQHAAAATSSGKSGGQRPQMVLQSSGGGASGSQIGSGVPIQVAAQGIAVPTPIPQYVAQPPVSSTPMVSQSGMNVTNHQQPGMVVTKRQRTGDPLAPVLADPTAIAAALQGRGRKKTQAQIDRRRERNRILARRTRLRKKFFFESLQKEVMDLQRENRALKDIVRSQMNDDEGRALLSDCDANKKLPPVVLEACGEMGDIDNQDFSLVKSIQQSQHCFIITDPSLQDNPIVFASDDFLNLVGYEREDVLGRNCRFLQGTETNRDKVNEIRKGLAVGDDVSVTLVN…
Odontella_aurita_CCMP816_GHBW01045238.1_6	GRNCRFLQGEGTDPKAVDVIRTAIKSGSDATACLLNYKADGTPFWNQLFVGALRDADDCIVNYVSILVSWFLLFLYVVIX
Odontella_aurita_CCMP816_GHBW01099645.1_1	APSPAGGPPPASVGFAQPPQRRHHLPFATPAMTAAVNAAQAASSKRKSDAAAARERKMSDKQKVERRERNREHAKRSRIRKKFLLESLQQSVSLLKEENEKLRNSIRAHLPEEAEELLKAENLAEAAAAAGGGLIANSSSDANKVLDDPDFSFIKALQTAQQNFVVTDPSLPDNPIVYATQGFLNLTGYTLDQVLGRNCRFLQGPETDPKAVEKIRRAIEDGTDMSVCLLNYRVDGTTFWNQFFIAALRDAAGNITNYVGVQCKVSDQYAANVCRRQEEAEQAEAEAQAAAAAEGGGGAGGX
Odontella_aurita_CCMP816_GHBW01295076.1_2	SSAPPTSPPAQLGRNDFDLIESLSAGRQSFVLTDPRLPDNPIVYCSDSFCELTGYTRMEVVGRNCRFLQAPETDPSAVQHVRKAIESGSDCTTVMLNAKADGTPFLESI
Odontella_aurita_CCMP816_GHBW01352020.1_4	YASDDFLTLTGYSQDQVLGRNCRFLQGNETSQDKIAHIRNGVKLGEDVSVTIANYTSDGTPFWNNLFIAALR
Odontella_CAMPEP_0113540980	MAENGSASAPAATKAEESAASVPSAGPAAALVAPPAAALAAPSASAQAAPAAPQSVNASVPAAPASASAPVATVTVAAAPVAPTVAGMYTLDPAAAVEPASNSLDLDELFRDCYFGEFPVPPFAANADTAAVAASAPTPPAPPSAAATAAAATVEPSPVVAMTTTTTTTMAPAPPAMTLMATSVTVSQKRTAEQANLTTPSPSAAPSHPGAPAAVASAAANAAVPDASSSSSASPTPMQFAPFGGISVASSAGITPPSARPAPVLSDPAGGGVGADRRDSNASQANRELTEAQKVERRERNREHAKRSRLRKKFLLESLQEQIHGLMGEIDQLKDIIRTELPQKAEALIKKVEGEEKKYAPVPTPSGFGPVKTLMEPDYRLMSALSGSQQNFAISDPSL…
Odontella_CAMPEP_0113544224	MAAVSNMMPVSLPRFASASTAASTAKQKQSDASLPSQTWGESGGGDMLDFDMLAEYLLEDGSGATGLPAFDFSTETPPSTDQQQQAGVVSPEHSGKSFVDPLANAAAEMKKAGVTASAPAPSVQASGARASQQVAAAPVAAARTIITAVASSPTTTVAAPPVPAPVPAPIPVSVLAPVPVSVLAPAPAPVSVLAPAPVSVLAPAPVSVPTPVPISVPLPNTTITKAIVPPPAAPIPAPAALAPAPVRVPLPNGVPQQLSLRGSMPDPSVTVNKRRRIDAAVPVVAATTAAPAGPVMTVNGQILHHTFPQRGGRQKSQAQIDRRRERNRILARRTRLRKKFFFESIQKDVTDLQQENAALKEIVRTRLNPGVAKSVLDDCKAMEEVPSCVLEHCGVAGTQ…
Odontella_CAMPEP_0113546386	XAPAATAPAAPAPAAPQAVPFAQPPQRRHHLPFATPAMTAAVNAAQAATSKRKSDAAAARERKMSDKQKVERRERNREHAKRSRIRKKFLLESLQQSVSLLKEENEKLRNSIRAHLPEEADELLKAENLAEAAAAAGGGGLXANSSSDANKVLDDPDFSFIKALQTAQQNFVVTDPSLPDNPIVYATQGFLNLTGYTLDQVLGRNCRFLQGPETDPKAVEKIRRAIEDGTDMSVCLLNYRVDGTTFWNQFFIAALRDAAGNITNYVGVQCKVSDQYAANVCRRQEEAEQAEAEAQDAADAAASEGAGGEQAPMAMDTDAGGSAAPAGAPAPASMAPPQAAPLPAPMPATTPVAPAPAPIPVQAPMSAAPVAAVPAVNAAAPAAPQAQG
Odontella_CAMPEP_0113553292	MMGMKSLQRSLSSRRKRGRRRGEKASGHASAKTVASTPGRLSGGGESDLVALANAELANSRRMPQHKEPAADPTTPLFTCISDIDESASFTTARSTPDRTSEKRVNCLEQVVPIQVSSSVNPVKILPTQTNVEAEVDHRLGRMREVEAENVDLKLRLRRAEEDAEKHREENADLRRRLAETEVRLTSTYSAAAAAAAAPTLAPVGSDASFATHNDSHGTIPPPQHATPAPSMCGTDAADCNDLLSLVGSPAPSHNTALRSPTSSRKPERRNIVEAVEYVDRVLRRISMSSVNSHTLHHAERTEEEQAIVPPQMVTILSESNLKDMVGGEDSTIGGVEDGEEKKDESEDLDNDYFFQDLGDAPCLPPSTYSAPPDDVNSGREEDVTKASSLERRTSENDE…
Odontella_CAMPEP_0113567698	XSSDFDLIERLTATGQSFVLTDPRLPDNPIVYASESFLELTGYGRDKVLGRNARFLQGPDTDTRSVATVREAVKGGSDATSTLLNYKADGTAFWNEFWVAALRDGRGKIVNYVGVQCAVDPPDASKXESKPAAVXKEQVDVATQHAAAAHNVSPTPIRTAGAQAAPPVAIDPSAMEYSGENAVARMDYYAMDGMDTVCDSVYLDDGVGEIDWAVLAETLEADYKDAEDLELSDDAAPGPASAQSDEGAEDAAAERSSGLEPVSDDESASDRRPGPSAPVSDSPITRAFVTKTVRSELIDCLVSSHGDVTIPRFASALDILSSIYAATTPQTCNSSFSNLLHGSWRSLSRPSYQGCLGTNNEGNFVYALGKMSFNMFQPGNLRCSVQQTLNDIKPVCKMD…
Odontella_CAMPEP_0113593008	MSHDAFQNGGMVQRPMFAPQGGKMGEDFDLNDLFADYLMTEVDDPMNPANLSMGAHPGATVAASLAQQQQHGALAQTAQAAVPAAAALPTGRGIKTAWHTGTMPVAPAPAQHFVEPMVKRYKVEDGQAAVNPLVAGIPAAAPAGSAISGRLGFSMVGGQVALPGQVAAAQKPQPEASKVPLPVGVGIRVGGAVGAVQPGGVQMTHTQWGGAVGQAQPGHPGATPGQFLMWGGMGGAAGVGGGVSEHAVAERRQRNREHAKRSRVRKKFMLESLQEQVRGLQKENEQLRMLIQKRIPRHAQKIINDVCSKNPLFSDEAEAQPSVPIPEGGEKKSSTELMKSDFSLIECLTSGQQNFVLSDPRLPDNPIVYASEGFYELTGYTREQVLGRNCRFLQGPGTD…
Odontella_CAMPEP_0113595614	XRNRILARRTRLRKKFFFESIQKDVTDLQQENAALKEIVRTRLNPGVAKSVLDDCKAMEEVPSCVLEHCGVAGTQLGRQDFNLIQGIQIXGVAGTQLGRQDFNLIQGIQKSQQCFVITDPSLQDNPIVYASDDFLGLTGYSREEVLGRNCRFLQGTETSPAKVAQIRKAVAIGDDCTVTLVNYTADGTAFWNNLFIAALRDAQNNIVNFIGVIVKVAGPDPSDPEAGKRLPGEVSPSNGLDHMFGDNPVQSGSAVEELDALAVAEAAEGTVKAIEGAVTAALVTTPTAVNSAAMASS
Odontella_CAMPEP_0113596326	SVPAAPASASAPVATVTVAAAPVAPTVAGMYTLDPAAAVEPASNSLDLDELFRDCYFGEFPVPPFAANADTAAVAASAPTPPAPPSAAATCGHDNNDDDDYGSRSARNDINGDDVTVSQKRTAEQANLTTPSPSAAPSHPGAPAAVASAAANAAVPDASSSSSASPTPMQFAPFGGISVASSAGITPPSARPAPVLSDPAGGGVGADRRDSNASQANRELTEAQKVERRERNREHAKRSRLRKKFLLESLQEQIHGLMGEIDQLKDIIRTELPQKAEALIKKVEGEEKKYAPVPTPSGFGPVKTLMEPDYRLMSALSGSQQNFAISDPSLPDNPIVYVSGGFLELTGYTLDQVLGRNCRFLQGPGTDQAAVEVIRRGIREGVDTSVCLLNYKADGTPFW…
Odontella_Sinensis_Strain_Grunow_1884_CAMPEP_0183291988	MSVAVSSMMPISLPRFSSASSSVADATAKAGQSSAPNGTQAQGGENGTGDMFDFDLLAEYLLDDGAAPGGMPAFDFGAETPPVSEPLQKAEVVSPEQAEASFVDPLLDENAALQEQMATVKFPSSNPTTASNGVFGLVQTQQTQAIQAAAAQQQTNGSQHPSVMIAQIPVAPAPSSHAQNIPVPSASPPSASIVLAPGAPIPAPLPPAAPLTAPLPVPAVTPAISIPSPVPAVPPVSLAPAAVLSPGALAPAHSVVGLPQHPILHSVIPDTNCTSNKRRRMNAPAPSVPTPAAVPVGAVMAMSGQILPQTYTQRGGRQKTQAQIDRRRERNRILARRTRLRKKFFFESLQKDVTDLQRENMILKEIVRTRFSPDKAKALLDECKAAEELPDVVSEQCGV…
Odontella_Sinensis_Strain_Grunow_1884_CAMPEP_0183321422	XLMAPSSAQPQIVTSAETAEQKGSGTKELTDQQKIERRERNREHAKRSRLRKKFLLESLQEQIQGLQSEISMLKDIIKEELPDKADELLKKVGGGDRQYTPIPTPSGFGPVKTLMEPDFRLMSALSGSQQNFAISDPSLPDNPIVYVSQGFLDLTGYTLDQVLGRNCRFLQGPGTDQAAVDVIRRGIREGVDTSVCLLNYKADGTPFWNQFFVAALRDAENNVVNFVGVQCEVSKAVVDKQIKEGNTPKLSE
Odontella_Sinensis_Strain_Grunow_1884_CAMPEP_0183322638	XGGGGSRERKMSDRQKTERRERNREHAKRSRIRKKFLLESLQQSVSLLKDENEKLRSSIRQHLGDEDADRLLSAENLANADAGGAGLIATSAGDANKVLEDPDFSFIKALQTAQQNFVVTDPSLPDNPIVYATQGFLNLTGYTLDQVLGRNCRFLQGPETDPKAVEKIRRSIEEGTDMSVCLLNYRVDGTTFWNQFFIAALRDAAGNVTNYVGVQCKVSDQYAANVCRRQEEADRAAEAEADPEAAQMAAAQAQAQAQAAPQAAMQPAQ
Odontella_Sinensis_Strain_Grunow_1884_CAMPEP_0183328884	MVGGQVAVPQKPQEAAVAAAAPLTTGTGVPLPVGVGIRVGGVPGAMPQAAGIVSPWGPGTAPGSAAAVMGQFLPGGQSSHPGGASNVDAATAAAHAAAGQFLMWGGXXXXXXXXXXXXXXXXXGMSDQAIAERRQRNREHAKRSRVRKKFMLESLQEQVRGLQKENEQLRMLVQKKIPQHAQKIIAECCAKNPLFADDADGVAPMPAPAAPGSIGPSGEKKSATELVRSDFSLIESLTSGQQNFVLSDPRLPDNPIVYASEGFYELTGYTREQVLGRNCRFLQGPGTDPKAVDVIRTAVANGTDSTTCLLNYKADGTPFWNQFFVAALRDQDNCIVNYVGVQCEVEPDAGASALEDKVNSVLPLKNKEGSDDGK
Phaeodactylum_tricornutum_Pt1_Phatr3_J15468.p1	MAQNLQMPRFGRANNTSGADTWGDCDAFDVDMLTEYLLNDGTLTSSGVTFDFNMDGAAHLSSTVSPENSEDGALPTVADSNEISAEVQKFAASHEGPSYVAVATSGMPIAPSPSLSFPALPTQVSMPGNDGQGLVFHHHQQQHANSTATSKRRRIDGMSGSALLAVSGGPTGSAFLGGDQLAAAAARAIQNQGRGRKKSQAQIDRRRERNRILARRTRLRKKFFFESLQKEIMDLQRENLVLKELVKVNISGEEGKKILEGCNAAENLPSSVLEACGEENDMDSQDFNLVRSIQSSQHSFMITDPSLQDNPIVFASDDFLKLTGYTREQVLGRNCRFLQGTETSQEKVNQIRKNLSEGEDVTVTLMNYTADGTPFWNKLFIAALRDAQNNIVNFIGVIV…
Phaeodactylum_tricornutum_Pt1_Phatr3_J15977.p1	MQNNFPQPLFAPAGQNGMQMDDFDLNEIFAEYFTNEFDDPLNAYTSSMANHNGAVTAVAMTQNDTVPTEGRKLAQTGGLTLPTGGIRTTFHTAAIQKAPLITDGTNPVTKKQKTDEQSQQQHQQLLHVQNPLQQQQQQALAAAHNSAMQAHQQTQNASNMQHPGAAMVQGGMVSLPVGVGIRLGGIGGIAPATAQSATRTSGVPGQFNMWGPGTGGMSEQAVAERRQRNREHAKRSRVRKKFMLESLQEQVREMQKQNQNLRMLVQEHIPEHAMKIIAECCTSSPLFEEMDGIDQTKGANLERADFSLMQSLTMGQQCFVLSDPKLPDNPIVFASPGFYKLTGYTSREVLGRNCRFLQGPGTDAKAVDVIRKAVGTGSDATVCLLNYKADGTPFWNQFF…
Phaeodactylum_tricornutum_Pt1_Phatr3_J51933.p1	MADQAKANPSGPSNTAPLFQMSDPANPSSTLDLDDLFNDIYYMDLPNGSNMDSDPTPVDVPSSNGNGHDGASKKRSADDFDGDSLDGTGNKDLTEQQKLERRERNREHAKRSRLRKKFLLESLQEQIHGLEEQLDGLKSAIKKELPQQAEQIITRICGDKEKFTPLPMPSGFGPVKTLMEPDFRLMSALSGSQQNFAISDPTLPDNPIVYVSQGFLDLTGYTLDQVLGRNCRFLQGPGTDQSAVEVIRKGITEGVDTSVCLLNYKADGTPFWNQFFVASLRDAENNVVNHVGVQCEVSKAVVEKHMGEQKKAAAEAAKARPVTTTSS
Phaeodactylum_tricornutum_Pt1_Phatr3_J8113.p1	MTDNNKSLSAHAQAAVTNRGNPATLNLDDIFGDVMFTPDGDTVFMSEQKEELLNSGEREVTTMASKATQDGQYQPVQQGGGLYTTQLYDNSKPALTMGVAGGINVQATAPVPYKSAPQATHHLQYAAPKKKSSSSSTSGSGSRSDRKMSEQQKVERRERNREHAKRSRIRKKFLLESLQQSVSLLKEENEKLKTSIRSHLGEEKADTLIDSANNNKTDVDGLLASSQGIANKVLDDPDFSFIKALQTAQQNFVVTDPSLPDNPIVYASQGFLNLTGYSLDQILGRNCRFLQGPETDPKAVERIRKAIEQGNDMSVCLLNYRVDGTTFWNQFFIAALRDAGGNVTNFVGVQCKVSDQYAATVTKQQEEEEEAAANDDED
Pleurosigma_sp_RCC3090_CACOSW_131520_1	MATEESIGVPNPLSGDASGAPLSSETAEPTPPSVASPAPQTTDVVVNPTPEPAVVVVVPDPTAPGSVPDPTAPGSHPGQAGAATTAVPAPAPVAAEPNGEGNVQVVKQMFRPPDHVTHDTDFMDFAIDLEDLFTDCYYPDVAPSNPSATKAPAAPVVPASVPTAAEKLAQQNTASQPVMQEQHPAPAPVAAVTAETTTTTATATATTTTQPATAVIAKVAAKGIVVPSPPAQEQQMADVVPSSAQQPQVVQLDATTAAAVAGAPSGSATMLPMKRPAPEAAIVPSTSRIAEPEPEPEPESEPXAGAGAGAGVGAGGEELTEQQKLERRERNREHAKRSRLRKKFLLESLQEQIHELQEQMDQLKNAIKEHVPTRAEEIIGRVCGDKDKYTPLPTPSGFG…
Pleurosigma_sp_RCC3090_CACOSW_139034_1	MFQVPCFAPAGTSAAAASNNTNGDNPPSFLVDTEDNFDVDLLAEYLLDDGLAGIEKSNEDSNVDFSIGPHPPPSSFVSPAQSEDGGFPPLGEATHSQLNQAVHPGSALVGPPTLVTSVPVSPTSTTADPSSMVVHQHDHVNKRRRMDNNIDNTNMAVGNPLPDFTSKVPIPGPVAAPLPAPVPAPVPAPVPAPVAAPIPSPVAIPFHAPVAPPVPAPLAAPVATPLPAPMAAPVPAPLAAPVPAPLAAPIPAPIGAPVPAPVPAPIPVPDIASHQQHFQPQPHLQHHQQQQQMMTAVALQQQQQQQGRGRKKTQAQIDRRRERNRILARRTRLRKKFFFESLQKEVIELQRQNAALKDLVKDRLAADESKQVLEECKAAENLPEAVVEACGEHVAELDQ…
Pleurosigma_sp_RCC3090_CACOSW_14734_1	MTDAPPPPFFSASNELSASTQAAVAQRGTPSTLNLDDIFGDVMFTPEGDTVFLSEEKDEGGMMNSGEGDNVKIVASKLRGDQYVAVNAGGGVETTQLNDNSKPSLVMGTGSSAAAPTSQKVPFKKTPQERHHLQYAAPKKKKGGSSRSSDRKMSDQQKVERRERNREHAKRSRIRKKFLLESLQQSVSLLKEENEKLKNSIRKQLGDDKANQLISAKASGDNNDGLLAPQQGIANKVLDDPDFSFIKALQTAQQNFVVTDPSLPDNPIVYASQGFLNLTGYSLDQILGRNCRFLQGPETDPKAVERIRKAIEQGNDMSVCLLNYRVDGTTFWNQFFIAALRDAGGAVTNFVGVQCKVSDHYAATVTKQQEEEEGGEE
Pleurosigma_sp_RCC3090_CACOSW_205465_1	MNAPLFSSSADGGGSQQVQRGNANAFNLDDIFGDVMFTPEGDTVFLGEQKDDGGIMNSGEGENVKIVASKLNGDQYVPVNQGGGLETTQLADNSKPSLVMGTAAVQQVPTGQSVPFKKAPQERHHLQYAASKRKKGSRSGADRKMSEQQKTERRERNREHAKRSRIRKKFLLESLQQSVSLLKXQDEXNSKKRNAVNETVNTRRGVVSEKKFLLESLQQSVSLLKEENEKLKTSIRKQLGDDKANQLIAAKVSGDNSDGLLAPSQGIANKVLDDPDFSFIKALQTAQQNFVVTDPSLPDNPIVYASQGFLNLTGYSLDQILGRNCRFLQGPETDPKAVERIRKAIEQGNDMSVCLLNYRVDGTTFWNQFFIAALRDASGAVTNFVGVQCKVSDHYAATV…
Pleurosigma_sp_RCC3090_CACOSW_206163_1	XYPDANQLDAPNRFEEAKDKRSGGAIVEIGETVAAAGGECXLKMSGLPSYIQNPLFAPASQQQREQGQQQDDFDVNEIFAEYFINEFDDPLNAYTSSMANYSGGAVRMEAEAAAAAAQAQPMQPLPQQTQQPQQQQQQQQQQQQQQQQPPQQAQIAQTGGVTTQFGSWAQAQQQQQQQQQQQQQQLPQQQQHLQQQQMQPVVKKARHEGIAGRPIQTPINLTPQTVSRKRKIKDRGEPSLKLVRLSLLRAGNVIEDVGLPSYIQNPLFAPASQQQREQGQQQDDFDVNEIFAEYFINEFDDPLNAYTSSMANYSGGAVRMEAEAAAAAAQAQPMQPLPQQTQQPQQQQQQQQQQQQQQQQQQQQPPQQAQIAQTGGVTTQFGSWAQAQQQQQQQQQQQQ…
Pleurosigma_sp_RCC3090_CACOSW_9172_1	MWNLFTNNANGNGGGFQQQQQNQTADLSLPPAAKRARLDNNGAYGVVPLMQNNGVMTPGGFQAMGGGMVPFGVGGGIANNNNNNNAMMFSTPMVDATTMMALAGQRQMANAAAEEAARLENRRKKNAALAKKSRERKKNLEVSLAIEMRELQDENERLKAIVKSQCAENAQDIIGECCYKPRGEGFQGAQSSKLSRSDFDLIESLTASKQSFVLTDPRKPDNPIVYASCAFLKLTGYTRDQVIGRNCRFLQGVETDDEAVNTMREAVQRGSDGATCLLNYKADGTPFWNNIFIAALRDQEQRIVNYVGVQCEIEKPNASSEEGNDVSETQASGQMSSEAAAQNGEILDTMDQPLPLSNNNNNNNNNNNMNNXNNNNNNNNNNNMNNTANNHPDITKLNR…
Proboscia_alata_Strain_PI-D3_CAMPEP_0200135956	MTGIPGALPGGQPQQATLQPIYAPAGNIGNPIAATSGTTTTTQAAPPAPISSQQYHIPGVSTATAQALAAGRAGSSLNLDEIFGDCFFTPEGETVFLSDQPQGSQDLASTGVLRSTEEHPQPSAYRYVQGNYIPATAAGGIATTNLTHPGKPAVVMGAAAPGALPQSQVPSNVPVRGVPQRHHMGYAIPAPISGIEESAGTVKTKRRVGGGRPSERKMSEQQKVERRERNREHAKRSRIRKKFLLESLQQSVSLLKDENERLKGSIRSHLGNEESENLLNEQSLQERGLIASNAQEANKVLDDPDFSFIKALQTAQQNFVVTDPSLPDNPIVYATQGFLNLTGYTLDQVLGRNCRFLQGPETDPKAVEKIRKSIEDGTDMSVCLLNYRVDGTTFWNQFF…
Proboscia_alata_Strain_PI-D3_CAMPEP_0200143588	MSVSALSMPFTVPLFVSASDASIAAKKNANGATSSYGINGKPSKTGGCGAATGGSTLASFLQAEGSVWSSVTGSGGDLDFDLLAEYLLDEGTQFGGGFDKDKALPDFSAPAAAIAVSEASSARTTPDLSSQFPSSQVPNLSNIISQPLTSRNVASNTSSTPQVRNLVTSQAPGTTAPSTNKTLPRGTASLQPQHPITIPITKPHGSTVLPAAPVPIYTVGAPSAQALSAPPLAAPAHPVVMMAAPGTVVPYTHTVSAANGTTPGQFIMPPNQFPPIVVHQHRPAAAMVVNTSGSNKRPRAVTGSGSQPTSRRQKTQAQIDRRRERNRILARRTRLRKKFFFESLQKEVTDLQLENLALKEIVKTTISDQDAEKAKAILSQCTANESLPSIIAESCGMDN…
Proboscia_alata_Strain_PI-D3_CAMPEP_0200159506	MMQTPTAPTPTPASGQQQAPTPAAPVLNQISITQHQPKNQVDSLLQQQQQPTPGNGQLSNQSRIGTAPVQQLVSSTLGTATNSIAVTTPASNVDQIFGIASTTMTNVPQQRGTAIEMFAAGPNTVEDNPQSSLDLDELFRDCYFGDFPVPNYAQPEPVLSSSEPTTSTQVPLAPPSVAIPITGMKRKAEIQHPQVNTSAQTPATIMYQSMPAPVAGRTISSTIVPAALSSTATISGPPPFTINHQNTGYGPLKSNMTGGVVAPKALTESQKVERRERNREHAKRSRLRKKFLLESLQDQIHGLQSEIESLRSIIKTELPQKADSLLSKVVSGGGCGQKTIVNGREYTPLPMPSGFGPVKTLMEPDYRLMSALSSSQQNFAISDPSLPDNPIVYVSQGFL…
Proboscia_inermis_Strain_CCAP1064/1_CAMPEP_0171323674	MTTTSEEHAFQASGVQKPIFAAASHQHGAQFTGDADLSDIFADYFIGEFDDPLNSIKPSKSVISTSFQQQGLQTTITAPMVATSSTFSLAEKQPITTQQPITTQQPITTQQPITTQQPITTQPNPLNINLPLGRGIRTAFHVGAVPRITAAVAHQMRVQNNSLAQAPPDAQSDGLTPLHQQHQKQISHLDKKIKIEQDTSIGSLQNNFTNAPATIAQPSGAISSRLGYTIVGGQLAVPQKGNESDLPNSDMKTAVPDGLRQQACNLPLGVGVKIGSLPLQRHILTGGAHGGETMAHRQLTKPGHFSFIQNNLSNNEKLTAQQILERRQRNREHAKRSRVRKKFMLESLQEDVRGLQRENHALRMLVQEKIPQHAQKIIQDCCTASPLFGDSVKTEEPHA…
Pseudo-nitzschia_arenysensis_Strain_B593_CAMPEP_0116114658	MSQPVTIPIFGSTSTQHPQQQAAGSSDWYMEDGEQDMDFDLLAEYLLEENPDSSHTGGFDFNTDFVVSPETSVVGAGDNGAAQARDIITQHAATIAAAPVPVAAPAVAQVQYAPVAAPPPLVMSPQIAAQGMAVPQTIPQYIPAQPMAPAPAATHQTRAPVRTTQKKTTDTKRRRTNPPEVAAQGLINTSYMTNGTANMSPAVVAAAAAAAAMQGRGRKKTQAQIDRRRERNRILARRTRLRKKFFFESLQKEVMELQKENAALRDIVRSEIEGEEGRALLEQCNASRKLPREVLEACGENPDLDQEDFNLVTSIQQSQHSFVITDPSLQDNPIVFASDDFLTLTGYSREDVLGRNCRFLQGTNTSKQKLDMIRKGLATGDDISVTLVNYTVDGTPFWN…
Pseudo-nitzschia_arenysensis_Strain_B593_CAMPEP_0116118010	MSAPPAANGEAPMPMFQMSNPTATTGEGSAQLPGATLDIGQLDLEELFVDCYYDVPGMADMANDQHANAPAPVAQPAPAPAAPEPVPAXAFAPSVAGDPAASAGMVAPPPPQPAAVTSTVPATKKRSADNISGEPSTAGQLTAKQKLERRERNREHAKRSRLRKKFLLESLQEQIHGLQEQLEKFKKTIRTEIPAPKAEQLIDEICGHENKYTPLPMPSGFGPVKTLMEPDFRLMSALSGSQQNFAISDPTLPDNPIVYVSQGFLDLTGYQLDQVLGRNCRFLQGPGTDQSAVDVIRKGIAEGIDTSVCLLNYKADGTPFWNQFFVAALRDAENNVVNYVGVQCEVSKAVVEKHMGVDKKK
Pseudo-nitzschia_arenysensis_Strain_B593_CAMPEP_0116127268	MSQGIQQPLFASASAQGQGDDFDLNEIFAEYFISEFENPVNAYTNAMGNYVAAPGTVAAPAPVSAAPISYAPAPAPVQHVQQPVVSSGIRTPYHSAVAAPAPPVVQQQAHSIGLPLAKRAKLEPGTTKTTTMTANVAATGGVTSRLGFNAGHLQGGAPGGTAVQMAGRGGILPAGVTLAQQQQQQQQGSYAQHQQQGTGVALPVGRGIRLGGAGGVAPATARKVPGVGGMIWGGPQMMGMSDQAVAERRQRNREHAKRSRVRKKFMLESLQEQVASLQRENQRLRMLVQDNVPEHAQMIISQCCTSSPLFGDTESSGQQGEEDSGDGKNKTTALVRSDFQLIDSLSAGQQNFVLSDPRLPDNPIVFATPGFYRLTGYTPEQVLGRNCRFLQGSGTDPKS…
Pseudo-nitzschia_arenysensis_Strain_B593_CAMPEP_0116147470	MNNQQPPPTQPPMFTTNLSATTQAAVAQRGTPSTLNLDDIFGDVMFTPDGDTVFLSEEQDALTSGEHHVTTQASKLVTHGEQQQHAIPIQRGGGYYTTQLHDSSKPARTMGTMVAGVTKSTPAVPYKEAPQQRHHIQYASMSKKKSSRSSERKMSEQQKNERRERNREHAKRSRIRKKFLLESLQQSVAMLKDENEKLRDSIRQHVGEEQAEALLEQKMDQNGDMRLTTSSQGAASKVLDDPDFSFIKALQTAQQNFVVTDPSLPDNPIVYASQGFLNLTGYSLDQILGRNCRFLQGPETDPKTVERIRNAIEHGDDLSVCLLNYRVDGTTFWNQFFIAALRDAAGNITNFVGVQCKVSDQYAASVIKEQQKEEEERAQAATEAAAEQHQQPPPQMQHD…
Pseudo-nitzschia_australis_Strain_10249_10_AB_CAMPEP_0199649800	MSVQPAVADGSAANGEPPQPMFQMSNPSAGANGGGITESSIGGGLDIGQLDLEELFVDCYYDVPGMADMVNDQHANAPAPAAAPATTPVPVPAPLPVIPVALPPAIAPAVSGDPAASAGMVAPPHTAVPTVASTAPAPPPMPTAVVSAAPSTVGSSGDKKRPSSDISGGDASNNNLDTNTGGPLTAKQKLERRERNREHAKRSRLRKKFLLESLQEQIHGLQEQLDKFKKTIRTEIPAPRAEELIDAICGHENKYTPLPMPSGFGPVKTLMEPDFRLMSALSGSQQNFAISDPTLPDNPIVYVSQGFLDLTGYQLDQVLGRNCRFLQGPGTDQSAVDVIRKGISEGIDTSVCLLNYKADGTPFWNQFFVAALRDAENNVVNYVGVQCEVSKAVVEKHMG…
Pseudo-nitzschia_australis_Strain_10249_10_AB_CAMPEP_0199656840	MSQPVTIPVFGSTSNQQPHTSGESGEWYMDDEEQDMDFDLLAEYLLEENPGHTQTTGGVNFDFGEFVVSPEQSVDFAGDNGAAQARDIITQHAATIAAAAAPEPSIQLPKTQVVQYAPVPAPPPLMVAPQLAAQGIAVPATIPQYTPQQSAPMAPAPAIVTMQQQQRVAPVRAAPKKTGGATEAKRRRTNPPEVAPQGLINTSYMTNGATNMSPAVVAAAAAAAAMQGRGRKKTQAQIDRRRERNRILARRTRLRKKFFFESLQKEVMELQRENAALKDIVRTEVETEEGKQLLEHCDAARKLPREVLEACGENPDLEEEDFNLVTSIQQSQHSFVITDPSLQDNPIVFASDDFLTLTGYSRDDVLGRNCRFLQGPETCKEKQDLIRKGLATGEDISVT…
Pseudo-nitzschia_australis_Strain_10249_10_AB_CAMPEP_0199665344	MFTTNLSATTQAAVAQRGTPSTLNLDDIFGDVMFTPDGDTVFLSEDQDALASGEQHVTTQASKIVTTTQHNAVDQNQQQQQQHAIPVQNGGGLYTTQLHDASKPARAMGTMVAGMTKTTTPVPYKEAPQQRHHLQYASMSKKKSSRSSERKMSEQQKNERRERNREHAKRSRIRKKFLLESLQQSVAMLKEENDKLRDSIRHHVGDEQAEKLLEQSLDGSNGDMRLITSSQGAANKVLDDPDFSFIKALQTAQQNFVVTDPSLPDNPIVYASQGFLNLTGYSLDQILGRNCRFLQGPETDPKAVERIRNAIEQGTDLSVCLLNYRVDGTTFWNQFFIAALRDAAGNITNFVGVQCKVSDTYAASVIKEQQKEEEEQVQAQQEAAAAAHQQQPQPLQQQP…
Pseudo-nitzschia_australis_Strain_10249_10_AB_CAMPEP_0199667920	MSQGIQQPLFASASAQGQGDDFDLNEIFAEYFISEFENPHNAYTNAMGNYVAAPGLVASPAPVVPSLTPYAPAPAPVQQTQQPGLSSGIRTPYHSAVAAPAPTPVAVQPQQQLPQPMGMPIAKRTKLEPGSTIKPTTMTATVAATGGVTSRLGFNTGHLQGGGQVQIGGGSGGILPGGVQGSVMVQQQQQGSYAQHQQQGTGVALPVGRGIRLGGAGGVAPSTARKVPGIGGIVWGGPQMMGMNDQAVAERRQRNREHAKRSRVRKKFMLESLQEQVASLQRENQRLRMLVQDNVPEHAQVIISECCTSSPLFGDGNAPIGEDDTADRTAKTALVRSDFQLIDSLSAGQQNFVLSDPRLPDNPIVFATPGFYRLTGYTPEQVLGRNCRFLQGSGTDPKA…
Pseudo-nitzschia_delicatissima_Strain_B596_CAMPEP_0116088696	MSAPPAANGEAPMPMFQMSNPAASVGDSNASLPGSGLDIGQLDLEELFVDCYYDVPGMADMANNQHANGGGGVAQPPPAPAPAPVAAPPPPPAAKKRSADSISGESATPGQLTAKQKLERRERNREHAKRSRLRKKFLLESLQEQIHGLQEQLEKFKKTIRAEIPAPKAEQLIDDICGHENKYTPLPMPSGFGPVKTLMEPDFRLMSALSGSQQNFAISDPTLPDNPIVYVSQGFLDLTGYQLDQVLGRNCRFLQGPGTDQSAVDVIRKGISEGIDTSVCLLNYKADGTPFWNQFFVAALRDAENNVVNYVGVQCEVSKAVVEKHMGVDKKK
Pseudo-nitzschia_delicatissima_Strain_B596_CAMPEP_0116093500	MSQPVTIPIFGSTSTQHPQQQAGGSGDWYMDDGEQDMDFDLLAEYLLEENPDPSHTGAFDFNTDFVVSPEQSVVGAGDNGAAQARDIITQHAATIASAPVPVAAPAPLAAPAPAPVQYAPVAAPPPLVMSPQIAAQGMAVPQTIPQYIPQQTMAPAPAAATHQTRAPARSLQKKPEAKRRRTNPPEVAAQGLINTSYMTNGTANMSPAVVAAAAAAAAMQGRGRKKTQAQIDRRRERNRILARRTRLRKKFFFESLQKEVMELQKENAALRDIVRSEIEGDEGRMLLEQCNAARKLPREVLEACGENPDLDQEDFNLVTSIQQSQHSFVITDPSLQDNPIVFASDDFLALTGYSREDVLGRNCRFLQGQNTSKQKLDMIRKGLVTGDDISVTLVNYTAD…
Pseudo-nitzschia_delicatissima_Strain_B596_CAMPEP_0116097124	MNNPPPTQPPMFTTNLSATTQAAVALRGTPSTLNLDDIFGDVMFTPDGDTVFLSEEQDALTSGEQNVTTQATKLVSHGEQQQQIAIQRGGGYYTTQLHDTSKPARTMGTMVPGVTKSXPAVPFKEAPQQRHHIQYASMSKKKSSRSSERKMSEQQKNERRERNREHAKRSRIRKKFLLESLQQSVAMLKEENDKLRDSIRQHVGEEQAQALLEQKMDGSNGDMTLTTSSHGAASKVLDDPDFSFIKALQTAQQNFVVTDPSLPDNPIVYASQGFLNLTGYSLDQILGRNCRFLQGPETDPKTVERIRNAIEQGEDLSVCLLNYRVDGSTFWNQFFIAALRDAAGNITNFVGVQCKVSDQYAASVIKEQQKEEEERTEAAEHHADQQQPPPQMQLDATMQ
Pseudo-nitzschia_delicatissima_Strain_B596_CAMPEP_0116097880	MSQGIQQPLFASATAQGQGDDFDLNEIFAEYFISEFENPVNAYTNAMGNYVAGPGTVAAPAPVSTAPAPYAPAPAPVQHVRQPVVSGGIRTPYHTAVAATAPPVQPQQQAQSMGLPVAKRPKLEPGTTKTTTMTANVAATGGVTSRLGFNAGHLQGAQGGTALQMGGRGGILPAGVSGSMTLAQQQQQQQQGSYAQHQQQGTGVALPVGGIRLGGVRGVAPQTAQKVPGVGGMIWGGPQMMGMSDQAVAERRQRNREHAKRSRVRKKFMLESLQEQVASLQRENQRLRMLVQDNIPEHAQLIISECCTSSPLFGDTEAGGQQGEEDSGDGKNKKTALVRSDFQLIDSLSAGQQNFVLSDPRLPDNPIVFATPGFYRLTGYTPEQVLGRNCRFLQGSGTD…
Pseudo-nitzschia_delicatissima_Strain_B596_CAMPEP_0116107472	MSQPVTIPIFGSTSTQHPQQQAGGSGDWYMDDGEQDMDFDLLAEYLLEENPDPSHTGAFDFNTDFVVSPEQSVVGAGDNGAAQARDIITQHAATIASAPVPVAAPAPLAAPAPAPVQYAPVAAPPPLVMSPQIAAQGMAVPQTIPQYIPQQTMAPAPAAATHQTRAPARSLQKKPEAKRRRTNPPEVAAQGLINTSYMTNGTANMSPAVVAAAAAAAAMQGRGRKKTQAQIXPKKRTKPHFGQENTAPKEVFFQENTAPKPHFGQENTAPKPHFGQENTAPKPHFGQENTAPKPHFGQENTAPKPHFGQENTAPKKFFFESLQKEVMELQKENAALRDIVRSEIEGDEGRMLLEQCNAARKLPREVLEACGENPDLDQEDFNLVTSIQQSQHSFVITDP…
Pseudo-nitzschia_fraudulenta_Strain_WWA7_CAMPEP_0199757022	MSQGIQQPLFASASAQGQGDDFDLNEIFAEYFISEFENPVNAYTNAMGNYVAGPGSVATPAPSIVPPAPTSFAPAPAVVQHMQQPVVSSGIRTPYHSAVASPTTAVQPQQQQQAQSMGLPIAKRVKVEPGTTKPTTMTANVAATGGVTSRLGFNTGHLQGGPQSGTALHMGGGRSGILHGGVPGSMTLAQQQHQQQQGSYAQHQQQGSGVALPVGRGIRLGGAGGVAPATARKVPGVGGMIWGGPQMMGMSDQAVAERRQRNREHAKRSRVRKKFMLESLQEQVASLQRENQRLRMLVQDNIPEQAQVIISECCTSSPLFGDTEGGGAQPGTGEDETGEGKNKTTALVRSDFQLIDSLSAGQQNFVLSDPRLPDNPIVFATPGFYRLTGYTPEQVLGRN…
Pseudo-nitzschia_fraudulenta_Strain_WWA7_CAMPEP_0199782690	MSAPPLDSSATNGAANGEAPMPMFQMSNPAAITNADGSTQSMEGGGGGLDIGNLDLEELFVDCYYDVPGMSDMVNNQHANGEGGVAQPPPAPAPVAPAPAPVLVAAVPVAAPAPHVLPTVAGDPAASAGMVAPPPEPLAVTSTTDSKKRPADEITPGTESSTTGGQLTAKQKLERRERNREHAKRSRLRKKFLLESLQEQIHGLQEQLEKFKKTIRTEIPAPKAEQLIDDICGHENKYTPLPMPSGFGPVKTLMEPDFRLMSALSGSQQNFAISDPTLPDNPIVYVSQGFLDLTGYQLDQVLGRNCRFLQGPGTDQSAVDVIRKGISEGIDTSVCLLNYKADGTPFWNQFFVAALRDAENNVVNYVGVQCEVSKAVVEKHMGEHKKK
Pseudo-nitzschia_fraudulenta_Strain_WWA7_CAMPEP_0199806722	MNGNQQQQQAQAPMFTTNLSATTQAAVAQRGTPATLNLDDIFGDVMFTPDGDTVFLSEDQEALASGEQQVTTQASKIVNHTDQQQQQAIPIQRGGGYYTTQLHDNTKPARTMGTMVPGVTKTTVAVPFKEMPQQRHHIQYASMSKKKSSRSSERKMSEQQKNERRERNREHAKRSRIRKKFLLESLQQSVAMLKEENDKLRDSIRQHVGDEQAEKLLEQKMDGSNGDMRLTTLSQGAANKVLDDPDFSFIKALQTAQQNFVVTDPSLPDNPIVYASQGFLNLTGYSLDQILGRNCRFLQGPETDPKTVERIRNAIEHGDDLSVCLLNYRVDGSTFWNQFFIAALRDAAGNITNFVGVQCKVSDTYAASVIKEQQKEEEEQAQAHQEAAQQQAEQQQQQP…
Pseudo-nitzschia_fraudulenta_Strain_WWA7_CAMPEP_0199830570	MSQPVTIPIFGSSSTQQPQPTQEQQAGGSGEWYMDDTEQDMDFDLLAEYLLEDNPGTVQPEGFDLNTDFVVSPEQSVDGAVDTGAARARDIITQHAATIASTAALAPPILAHVPKSQFVQYAPVAAPPPLVMSPQIAAQGMAVPQSIPQYIPQQASAMAPAPTIVSTQQQTRAPVRTAQQKKAGSAMDAKRRRTNPPEVDPQGLINTSYMTNGTTNMSPAVVAAAAAAAAMQGRGRKKTQAQIDRRRERNRILARRTRLRKKFFFESLQKEVMELQRENAALRDIVRTEIEGEEGRTLLEQCNAARKLPREVLEACGENPDLDQEDFNLVTSIQQSQHSFVITDPSLQDNPIVFASDDFLTLTGYSREEVLGRNCRFLQGSHTSKDKLDLIRKGLTTGD…
Pseudo-nitzschia_heimii_Strain_UNC1101_CAMPEP_0197173426	MSQPVTIPIFGSTSTQQQQSTQHQQAGVSGEWYMDDGEQDMDFDLLAEYLLEENPGSSQTGGVNFDFNADFVVSPPQSDDGAPDSTGAQVAREIITQHAAAITSTAAPAASQPPKSQVIQYAPVAAPPPLVMSPQIAAQGMAVPQTIPQYVPQQPIAMAPAPAIVTTQQASVHTGTTQDNKSTDTVETKRRRINLPEVAPQRLINTSYMTNGITNMSPAVVAAAAAAAAMQGRGRKKTQAQIDRRRERNRILARRTRLRKKFFFESLQKEVVELQKENAALRDIVRTEIDGEEGRELLEQCNAARKLPREVLEACGENPDLDQEDFNLVTSIQQSQHSFVITDPSLQDNPIVFASDDFLTLTGYSRDDVLGRNCRFLQGTHTSKEKVDLIRKGLATGED…
Pseudo-nitzschia_heimii_Strain_UNC1101_CAMPEP_0197181792	MNTQHQQTHSPMFASNLSATTQAAVAQRGIPSTLNLDDIFGDVMFTPDGDTVFLSEDQDALASGEQQITTQASNIVNHGEQQQAIPIQRGGGYYTTQLQDSSKPALTMGAMVPGVTKPTTTVPFKEAPQHRHHIQYATMSKKKSSRSSERKMSEQQKNERRERNREHAKRSRIRKKFLLESLQQSVAMLKEENDKLRDSIRQHVGEEQAEKLLEEKMDGANGDMRLTTSSQGSANKVLDDPDFSFIKALQTAQQNFVVTDPSLPDNPIVYASQGFLNLTGYSLDQILGRNCRFLQGPETDPKTVERIRNAIEQGDDLSVCLLNYRVDGTTFWNQFFIAALRDAAGNITNFVGVQCKVSDTYAASVIKEQQREEEEQAQAQKEAAAAAQQQEQHQQEEQQ…
Pseudo-nitzschia_heimii_Strain_UNC1101_CAMPEP_0197183592	MSQGIQQPLFASASVQGQGDDFDLNEIFAEYFISEFENPVNAYTNAMGNYVAGPGNLAAPAPANVAPTPTAYAPVPANIQHIQQTGVSSGIRTPYHSAVAAPASTVATIQPQQQQAENLGLPTAKRAKLEPGATKQTTMTANVAATGGVTSRLGFNTVHLQGGAQGGTALQIGGRGGILPAGVPGSMALAQQQQGTFAQHQQQGTGVTLPVGRGIRLGGAGGVAPATARKVPGVGGMIWGGPQMMGMSDQAVAERRQRNREHAKRSRVRKKFMLESLQEQVASLQHENQRLRMLVQDNIPEHALTIISECCTSNPLFGDTSSVGEEDDETGDGKNKTTALVRSDFQLIDSLSAGQQNFVLSDPRLPDNPIVFATPGFYRLTGYTPEQVLGRNCRFLQGS…
Pseudo-nitzschia_heimii_Strain_UNC1101_CAMPEP_0197193840	MSAHPVDASAPNGTGNGEVPMPMFQMSNPDAAAAGDNTQTTSDNGLDIGQLDLEELFVDCYYDIPGMADMANNQHANGAGGFDPPNPAPAPAPVAAAPAPMQVPSVPVVAPASAVAPAVAGDPAASAGMVAPPPQPVAVTSTVTDSKKRSADNISGDPEATITTGGQLTAKQKLERRERNREHAKRSRLRKKFLLESLQEQIHGLQEQLEKFKKTIRTEIPAPKAEQLIDEICGHENKYTPLPMPSGFGPVKTLMEPDFRLMSALSGSQQNFAISDPTLPDNPIVYVSQGFLDLTGYQLDQVLGRNCRFLQGPGTDQSAVDVIRKGISEGIDTSVCLLNYKADGTPFWNQFFVAALRDAENNVVNYVGVQCEVSKAVVEKHMGEHKKK
Pseudo-nitzschia_multiseries_CLN-47_181895	MAQQQQQGSYAQHQQQGTGVALPVGRGIRLGGAGGVAPATARKVPGVGGIVWGGPQMMGMNDQAVAERRQRNREHAKRSRVRKKFMLESLQEQVASLQRENQRLRMLVQDNIPEHAQVIISECCTSSPLFGENSPVGEDDNDIAAKTALVRSDFQLIDSLSAGQQNFVLSDPRLPDNPIVFATPGFYRLTGYTPEQVLGRNCRFLQGSGTDPKAVDIVRKAIQSGSDCTVCILNYKADGTPFWNQFFVAALRDSDNCIVNYVSSLFNLSLVCLACPSCFFLSLIFHA*
Pseudo-nitzschia_multiseries_CLN-47_212782	MNNQQQAQQQQQQQAPPPLFTTNLSATTQAAVAQRGHPSTLNLDDIFGDVMFTPDGDTVFLSEEQDALASGEQHVTTHATKIQQQQQAIPVPNGGGFYTTQLHDASKPARAMGTMVAGVTKTTAPVPYKEAPQQRHHLQYASMSKKKSSRSSERKMSEQQKNERRERNREHAKRSRIRKKFLLESLQQSVAMLKEENDKLRDSIRQHVGDEQAEKLLEQKMDGSNGGDMRLTTSSQGAANKVLDDPDFSFIKALQTAQQNFVVTDPSLPDNPIVYASQGFLNLTGYSLDQILGRNCRFLQGPETDPKAVERIRNAIEQGTDLSVCLLNYRVDGSTFWNQFFIAALRDAAGNITNFVGVQCKVSDTYAASVIKEQQKEEEEQAQQAHAQQDAASGVHQQQ…
Pseudo-nitzschia_multiseries_CLN-47_24790	MSAPPLNAGPADGAAPADAPQPMFQMSNPNASATAQMPGGGLDIGQLDLEELFVDCYYDVPGMVDMANDQHANAPAPAATAAEAPVAVAAPPSVAGDPSASASVGMVAPPPLAVPQPAAVPSAAPTSADSASNLDSKKRPSSEISDGSLPGGQLTAKQKLERRERNREHAKRSRLRKKFLLESLQEQIHGLQEQLDKFKKAIRTEIPAPRAEEVIDQICGHENKYTPLPMPSGFGPVKTLMEPDFRLMSALSGSQQNFAISDPTLPDNPIVYVSQGFLDLTGYQLDQVLGRNCRFLQGPGTDQSAVDVIRKGIAEGIDTSVCLLNYKADGTPFWNQFFVAALRDAENNVVNYVGVQCEVSKAVVEKHMGKEKK*
Pseudo-nitzschia_multiseries_CLN-47_283256	MSQGIQQPLFASASAQGQADDFDLNEIFAEYFIGEFENPHNAYTNAMGNYVAAPGTVAAPAPQPPPAITYAPAPTNVQLVQQPGLSTGIRTPYHSAVAAPAPPPLAAPVQPQQHQHQHQTMGMPIAKRAKLEPGATTKTTMTATVAATGGVTSRLGFNTGHLQGGSQVQMGGASGGMLAGGVPGSMMAQQQQQGSYAQHQQQGTGVALPVGRGIRLGGAGGVAPATARKVPGVGGIVWGGPQMMGMNDQAVAERRQRNREHAKRSRVRKKFMLESLQEQVASLQRENQRLRMLVQDNIPEHAQVIISECCTSSPLFGENSPVGEDDNDIAAKTALVRSDFQLIDSLSAGQQNFVLSDPRLPDNPIVFATPGFYRLTGYTPEQVLGRNCRFLQGSGTDPK…
Pseudo-nitzschia_multiseries_CLN-47_291064	MNNQQQAQQQQQQQAPPPLFTTNLSATTQAAVAQRGHPSTLNLDDIFGDVMFTPDGDTVFLSEEQDALASGEQHLHDASKPARAMGTMVAGVTKTTAPVPYKEAPQQRHHLQYASMSKKKSSRSSERKMSEQQKNERRERNREHAKRSRIRKKFLLESLQQSVAMLKEENDKLRDSIRQHVGDEQAEKLLEQKMDGSNGGDMRLTTSSQGAANKVLDDPDFSFIKALQTAQQNFVVTDPSLPDNPIVYASQGFLNLTGYSLDQILGRNCRFLQGPETDPKAVERIRNAIEQGTDLSVCLLNYRVDGSTFWNQFFIAALRDAAGNITNFVGVQCKQATTY*
Pseudo-nitzschia_multiseries_CLN-47_3014	MSQPVTIPVFGSTSNQQPQTSGGSGEWSYMEDGTQDVDFDLLAEYLLEDGSAQTGGVNFDFGSDFVVSPEQSVDGARDNGAAQARDIITQHAASIAAAAAPEPAPMPPAPPQPGNTQVVQYAPVPAPPPLMAPPQIAAQGMAVPAVPTTIPQYVSHTQTHAHAHVHAHAHAHTMQTQTQASLAPAAAPQAAAPSRPAPKKLGAAAPDAKRRRTNPPEVAPQGLINTSYMTNGTANMSPAVVAAAAAAAAMQGRGRKKTQAQIDRRRERNRILARRTRLRKKFFFESLQKEVMELQRENAALKDIVRTEVESEEGRMLLEQCNAARNLPREVLEACGENPDLDQEDFNLVTSIQQSQHSFVITDPSLQDNPIVFASDDFLTLTGYSRDDVLGRNCRFLQG…
Pseudo-nitzschia_multiseries_CLN-47_36399	MNNQQQAQQQQQQQAPPPLFTTNLSATTQAAVAQRGHPSTLNLDDIFGDVMFTPDGDTVFLSEEQDALASGEQHVTTHATKIVHPSEQQQQHSHQQHSQHQQEQEQQQQQQQPQQQQQQQAIPVPNGGGFYTTQLHDASKPARAMGTMVAGVTKTTAPVPYKEAPQQRHHLQYASMSKKKSSRSSERKMSEQQKNERRERNREHAKRSRIRKKFLLESLQQSVAMLKEENDKLRDSIRQHVGDEQAEKLLEQKMDGSNGGDMRLTTSSQGAANKVLDDPDFSFIKALQTAQQNFVVTDPSLPDNPIVYASQGFLNLTGYSLDQILGRNCRFLQGPETDPKAVERIRNAIEQGTDLSVCLLNYRVDGSTFWNQFFIAALRDAAGNITNFVGVQCKVSDTY…
Pseudo-nitzschia_multiseries_CLN-47_4044	MSQGIQQPLFASASAQGQRNSASLSTPLSLSDFTLRNGFQADDFDLNEIFAEYFIGEFENPHNAYTNAMGNYVAAPGTVAAPAPQPPPAITYAPAPTNVQLVQQPGLSTGIRTPYHSAVAAPAPPPLAAPVQPQQHQHQHQTMGMPIAKRAKLEPGATTKTTMTATVAATGGGGSQVQMGGASGGMLAGGVPGSMMAQQQQQGSYAQHQQQGTGVALPVGRGIRLGGAGGVAPATARKVPGVGGIVWGGPQMMGMNDQAVAERRQRNREHAKRSRVRKKFMLESLQEQVASLQRENQRLRMLVQDNIPEHAQVIISECCTSSPLFGENSPVGEDDNDIAAKTALVRSDFQLIDSLSAGQQNFVLSDPRLPDNPIVFATPGFYRLTGYTPEQVLGRNCRF…
Pseudo-nitzschia_pungens_Strain_cf._cingulata_CAMPEP_0172363240	MNNQQQQQQAQAPLFTSNLSATAQAAVAQRGTPSTLNLDDIFGDVMFTPDGDTVFLSEEQEALASGEQHVTTHASKIVQEQQQPQAIPVQNGGGFYTTQLHDGNKPARAMGTMVAGVTKTTAPVPYKEAPQQRHHLQYAMTKKKSSRSSERKMSEQQKNERRERNREHAKRSRIRKKFLLESLQQSVAMLKEENDKLRDSIRQHVGDEQAEKLLEQKMDGSNGDMRLTTSSQGAANKVLDDPDFSFIKALQTAQQNFVVTDPSLPDNPIVYASQGFLNLTGYSLDQILGRNCRFLQGPETDPKAVERIRNAIEQGTDLSVCLLNYRVDGSTFWNQFFIAALRDAAGNITNFVGVQCKVSDTYAASVIKEQQKEEEEQAQAQQEAAAAGGMVEHHHQPPM…
Pseudo-nitzschia_pungens_Strain_cf._cingulata_CAMPEP_0172364462	MSAPPLNAGAADVTAQTEAPKPMFQMSNPNAGVNGEADANNGGVLDIGQLDLEELFVDCYYDIPGMADMANDQHANAPAPAAAAVAVAPPASAIAPAVAGDPAASAGMVAPPLPPVPQPAAVPSAAPSAQESKKRAASEITELSASGGQLTAKQKLERRERNREHAKRSRLRKKFLLESLQEQIHGLQEQLDKFKKAIRTEIPAPRAEEVIDKICGHENKYTPLPMPSGFGPVKTLMEPDFRLMSALSGSQQNFAISDPTLPDNPIVYVSQGFLDLTGYQLDQVLGRNCRFLQGPGTDQSAVDVIRKGIAEGIDTSVCLLNYKADGTPFWNQFFVAALRDAENNVVNYVGVQCEVSKAVVEKHMGKEKK
Pseudo-nitzschia_pungens_Strain_cf._cingulata_CAMPEP_0172380104	MAQPVTIPVFGSTSNQQPQTSGGGSGEWYMDDGEQDMDFDLLAEYLLEENPGSTQTGGGMNFDFGDFVVSPEQSVDGAGDNGGAAQARDIITQHAASIAAAATPVLASVTAISETPKTQVVQYAPVPAPPPLMVPPQIAAQGMAHPSPIPQYIPQAHPAVRVQAQHQQQQTHQPPAPAAAPLKTTTAPDAKRRRTNPPEVAPQGLINTSYMTNGTANMSPAVVAAAAAAAAXAGPGPQENPGPDRPEAGAKPHFGTEDAAPEKVFLRVAAKGGPGTPTGKRRAPRHCPLRGGIGGGPRAAGAVQRGSESAAGGLGGLGENPDLDQEDFNLVTSIQQSQHSFVITDPSLQDNPIVFASDDFLTLTGYSREDVLGRNCRFLQGPETSKEKLDIIRKGLATG…
Pseudo-nitzschia_pungens_Strain_cf._pungens_CAMPEP_0172390108	MSQGIQQPLFASASAQGQTDDFDLNEIFAEYFIGEFENPHNAYTNAMGNYVAAPGTVAAPAPPAPAPAITYAPAPTPVQQPVLSTGIRTPYHSAVAAPAPTPTPLAAPMQPQSQTMGLPLAKRAKLEPGSITKTTTMTATVAATGGVTSRLGFNTGHLQGGSQVQMGGAGGGISAGGVHGSMIAQQQQPGSYVQHQQQGTGVALPVGRGIRLGGAGGVAPATARKVPGVGGIVWGGPQMMGMNDQAVAERRQRNREHAKRSRVRKKFMLESLQEQVASLQRENQRLRMLVQDNIPEHAQVIISECCTSSPLFGDGNSQIREEENRDASRKTALVRSDFQLIDSLSAGQQNFVLSDPRLPDNPIVFATPGFYRLTGYTPEQVLGRNCRFLQGSGTDPKAV…
Pseudo-nitzschia_pungens_Strain_cf._pungens_CAMPEP_0172408534	MAQPVTIPVFGSTSNQQPQTSGGGSGEWYMDDGEQDMDFDLLAEYLLEENPGSTQTGGGMNFDFGDFVVSPEQSVDGAGDNGGAAQARDIITQHAASIAAAATPVLATVTAISETPKTQVVQYAPVPAPPPLMVPPQIAAQGMAHPSPIPQYVPQAHPAVRVQAQHQQQQTHQPPAPAAAPQKTTTVPDAKRRRTNPPEVAPQGLINTSYMTNGTANMSPAVVAAAAAAAAMQGRGRKKTQAQIDRRRERNRILARRTRLRKKFFFESLQKEVLELQRENAALRDIVRSEVESEEGRVLLEQCNAARNLPREVLEACGENPDLDQEDFNLVTSIQQSQHSFVITDPSLQDNPIVFASDDFLTLTGYSREDVLGRNCRFLQGPETSKEKLDIIRKGLATG…
Pseudo-nizschia_multistriata_B856_VEU34876.1	MGNYVAGPGTVAPSPAITAPAPASTTYAPAPVQQMQQPGLSTGIRTPYHSAVAVPAPAPTVVSAAQPQTLGLPVAKRAKLLPGITTKSTTMTATVAATGGVTSRLGFNTGHLQGGTQVQMGSGALLPGGVPGSMMAQQQQQGSYAQHQQQGTGVALPVGRGIRLGGAGGVAPATARKGPGVGGIVWGGPQMMGMNDQAVAERRQRNREHAKRSRVRKKFMLESLQEQVASLQRENQRLRMLVQDNIPEHAQVIISECCTSSPLFGDGNAQSGEEETQDRTGKTALVRSDFQLIDSLSAGQQNFVLSDPRLPDNPIVFATPGFYRLTGYTPEQVLGRNCRFLQGSGTDPKAVDIVRKAIQSGSDCTVCILNYKADGTPFWNQFFVAALRDSDNCIVNYVG…
Pseudo-nizschia_multistriata_B856_VEU34877.1	MGNYVAGPGTVAPSPAITAPAPASTTYAPAPVQQMQQPGLSTGIRTPYHSAVAVPAPAPTVVSAAQPQTLGLPVAKRAKLLPGITTKSTTMTATVAATGGVTSRLGFNTGHLQGGTQVQMGSGALLPGGVPGSMMAQQQQQGSYAQHQQQGTGVALPVGRGIRLGGAGGVAPATARKGPGVGGIVWGGPQMMGMNDQAVAERRQRNREHAKRSRVRKKFMLESLQEQVASLQRENQRLRMLVQDNIPEHAQVIISECCTSSPLFGDGNAQSGEEETQDRTGKTALVRSDFQLIDSLSAGQQNFVLSDPRLPDNPIVFATPGFYRLTGYTPEQVLGRNCRFLQGSGTDPKAVDIVRKAIQSGSDCTVCILNYKADGTPFWNQFFVAALRDSDNCIVNYVS…
Pseudo-nizschia_multistriata_B856_VEU43851.1	MLFFAIDVVFIVSSDFVVSPEQSVDGAGDNGAAQAKSIITQHAATIAAAAPAPIPSPKMTQVVQYAPVPPPPPLMVAPQIAAKGMAVPATIPQYVPQRSSSMAPAPASNQQAPTKAALKTKGGAADAKRRRTNPPEVAPQGLINTSYMTNGTANMSPAVVAAAAAAAAMQGRGRKKTQAQIDRRRERNRILARRTRLRKKFFFESLQKEVMELQRENAVLKDIVRTEVNTEEGRLLLEQSNAAKKLPREVLEACGENPDLDQEDFNLVTSIQQSQHSFVITDPSLQDNPIVFASDDFLRLTGYSRDDVLGRNCRFLQGPETSKDKLDIIRKGLPSGEDISITFVNYTADGTPFWNKLFIAALRDAQNNIVNFIGVVVKVASPEPGDPEFGKQIGVENPD…
Rhizosolenia_setigera_Strain_CCMP_1694_CAMPEP_0178962676	MSSTNNLYPQAPCFTSSVPPMSAATSQAVATRGTPATLNLDDIFGDCFFTPKGDAVFLSDQVDNDNEGAIVSTESEVATNASRMNPDGVSVPVQSGGGIQTTNLLSSGHNATTMGQSSDQIERPNPIPFSTTPQKEHHLGYISTDVASNKRRRQRPNHERKMSEQQKVERRERNREHAKRSRIRKKFLLESLQQSVSLLKEENEKLRHNIRHYLGDEKAEKLLSKKNLEEQSAAAAAAGLIANSANDANKVLDDPDFSFIKALQTAQQNFVVTDPSLPDNPIVYATQGFLNLTGYTLDQVLGRNCRFLQGPETDPKAVEKIRKSIEDGSDMSVCLLNYRADGSTFWNQFFIAALRDAAGNITNYVGVQCKVSDQYAATIIQRQEDNETNENSMGQVDPT…
Rhizosolenia_setigera_Strain_CCMP_1694_CAMPEP_0178967734	MEQNNSETPTEPNGSTNGAAGNVNNSAALQMFAQPTPAGEQNNGDMPIDLDDLFHDCYFGDFPVPPFSGAQDGNVVPDFMSSSAVAAAATTATTTTTTTXXXXXTTTVPNTTITAPTVATVVAPTTVPVQQQQQPQQQQIVTTQKRKADTITPSPVSTTTTYSTTSQFPSYSSAPAPARKLTEQQKVERRNRNREHAKRSRLRKKFLLESLQEQIHGLQSEISSLKDIIKKELPEKADALLEVYGAKEKYTPLPMPSGFGPVKTLMEPDYRLMSALSGSQQNFSISDPSLPDNPIVYVSQGFLDLTGYSLDQVLGRNCRFLQGPGTDQSAVDVIRKGVREGVDTSVCLLNYKADGTPFWNQFFVAALRDAENNVVNFVGVQCEVSKAVVESHMSNSISE…
Rhizosolenia_setigera_Strain_CCMP_1694_CAMPEP_0178968600	MDESVFRNNGIRMPVFAGAAQQQQQDYNNNDNDLTELFAEYFSNESEDYHSTQAHVQVHQQAAQASANAPGSSGTFTYSQLVNNPLLAAANVVSVQQAQAQLDAQAHHAHQHLATQENSSVGTNQHQGHXGVVTLPTGRGIKTAWHSGALPTVLPNNIQVAGTLMQQAMQAQQQMEQQQALQNHHQAQTQSQAPSTAAGLNSLSHHMQQAMHNAQQQHKHHAHIDKKLKTDHQNVQQLLQQANANLAQQQQQNQNIGSALSGRLGFSMVGGQLVQNQQASNNDNSNNMNNTLQAMAAAAEKEAQTAASVTNLPVGVGLKIGGLSGIVAQHAAAAQAQQLQNQTTVSDHQSSEQTQQGLVWKPAAGLQGVASVSPGALWSSGTAGGGLSDQVVAERRQRN…
Rhizosolenia_setigera_Strain_CCMP_1694_CAMPEP_0178971408	MSAMVSNPSTSFPCFISSSSAKAGGGNNTANVGNIDGPTDSNNELDFDLLAEYLLDDVGVPLFSNTSMDFSCDIENDTNRQGVTTGEPSVVSGNTTPPEMYTQSVGGDINQQQQEQQQNQNNVASINHTGAPEAVQTQSVDNNIVGDLAHVEQLIYDHAASAAGNDTNTQKVPPSYGVPNQQVQVQPHQPGTSAQPPTKRQRTNVVASRVPHQNAYLVQANQSQPIVNSHANHKQNMNSAITNAAPTHLSNNQKMGEQFVTTASGRQKKVKSQAQIDRRRERNRILARRTRLRKKFFFESLQKEVINLHRENQVLKDMLRDGIEDKELANKVLKECCTAELPDVVKENCAQELGIADTDGLDPQDFSLVKSLKTSQQCFVITDPSLQDNPIVYASDDFY…
Seminavis_robusta_D6_Sro1194_g251270.1	MATNFAYMGHPLFAPASQQQQVQVQAQQPAPAAAPQQQAGGDDFDLNEIFADYFTNEFEDPLNAYTGGMATYGQSVGGTSLPTGGIKTQFHLGTTAAQAHAAALAQQQANAAPPAKKAKHDPTMAMVAQQGGGGGGGITLPVGVGIQVGGLGGVAPQTAAGMANGAGGGNMWDQNYAGMSEQAIAERRLRNREHAKRSRVRKKFMLESLQGEVLTLQKENENLRLLIQTHLPSESQEIISECCTTNPLFADGAEGEVVEPKKSTQLEKSDFTLMESLSGSQQNFVLSDPRLPDNPIVFASPGFYKLTGYTSKEVLGRNCRFLQGPGTDARAVEVIRKAIQTGADTTVCILNYKADGTPFWNQFFLASLRDSENNIVNFVGVQCEVEPEVGQSALEDKVN…
Seminavis_robusta_D6_Sro1231_g254590.1	MSTSQNVNPPMFASANNKSANGASPGDPPAWLMEGSDPLDVDLLAEYLLDDGKPAPNGMTFDFNIDAAGANGNVVSPEQSEDGAFPPVAEASNAQLAAPPPPQHPHLAPAPPPQPIAQAPVHQPIAQAPAPPMQHHYHQHPGHPHAPVPPQHHHIPIAPPPMAVIPVAPAPVHVAPAPVVYAPAPVAYAPAQPVQALAPAPPGGAQMMVHHQHGNYPKRQRINPVPGVAPVPSAPAPTSSIVPGGQQLVDAAQAAMQTGGRGRRKSQAQIDRRRERNRILARRTRLRKKFFFESLQKEVMDLQRQNAALKDLVKSKFSMEESRKVLDTCKAVEKLPEAVVEACGEHAAEMEQQDFNLVRSVQQSQHSFIITDPCLQDNPIVFASDGFLKVTGYAREDVL…
Seminavis_robusta_D6_Sro5_g004540.1	MSMPLYTTAGANMSAQAAAAVAQRGTPSTLNLDDIFGDVMFTPDGETVFLSEQQDQHNLLQSGEGQNVQIVASKQHAAGQYVPVPQGGGLATTRLADPAKPPALVMGAAPTQTVPTAQAVPFKKTPQERHHLQFAANPKRKRSSRADRKMSEQQKTDRRERNREHAKRSRIRKKFLLESLQQSVSLLKEENDKLKSSIKTRLGNDQGDKLITEYVQGDAVQGPDGLLAGSGGMANKVLDDPDFSFIKALQTAQQNFVVTDPSLPDNPIVYASQGFLNLTGYSLDQILGRNCRFLQGPETDPKAVEHIRKAIEQGNDMSVCLLNYRVDGTTFWNQFFIAALRDASGTVTNFVGVQCKVSDQYAAQITKQQEEEDAAAAATDGGEDGGDEEPAE*
Seminavis_robusta_D6_Sro624_g177380.1	MAALNLDDIFSDVMFTPEGDTIFLSEEREDDMLNSGEGENIKIVASKKTDGGFIPTPAGGGLDTTNLADPSKEALVMGNAAVKAVPTAQAVPFKEKPQKKNQLEYAAKKKKKKGDKKTKEDAKKSRVRKKFLLESLQQSVGLLKDENEKLRNAIKTHLGADQAEKLFRQKGGGGDEGLIASTQGIANKVLDDPDFSFIKALQTAQQNFVVTDPSLPDNPIVYASQGFLNLTGYSLDQILGRNCRFLQGPETDPKAVEHIRKAIEQGNDMSVCLLNYRVDGTTFWNQFFIAALRDASGTVTNFVGVQCKVSDQYAATVTKQQDESGEPSG*
Seminavis_robusta_D6_Sro971_g226430.1	MASEQGGAGDVNPTPMFQMSNATGNAALDFNVDLDDIFSECYYLDLPGGQQPAAAPLAGTPLVPVPSIPAAAAAPVPVLAPPPVAAPAPAKRSAAEAGLPTEAKPAPVPAKAKSSVSGDGNGNNGGVEELTEQQKLERRERNREHAKRSRLRKKFLLESLQEQIHALQEQLESFKVVVKEYAPGKAEDIITRICGNKEKYTPLPTPSGFGPVKTLMEPDFRLMSALSGSQQNFAISDPTLPDNPIVYVSQGFLELTGYTLDQVLGRNCRFLQGPGTDQSAVEVIRKGIKEGVDTSVCLLNYKADGTPFWNQFFVAALRDAENNVVNFVGVQCEVSKAVVEKHMGDGKKK*
Shionodiscus_bioculatus_RCC1991_CAAOSW_2877_1	EAPSAPQQPLLRSDFSLIESLTSGQQNFTLSDPRLPDNPIVFASPGFYELTGYAREEVLGRNCRFLQGAGTDRKAVDVIRTAVANGTDATVCLLNYKADGTPFWNQLFVAALRDGDNCIVNYVGVQTLIEPNAGASALEDKVNAAHPISVGVGDDIDDKDAKK
Shionodiscus_bioculatus_RCC1991_CAAOSW_39111_1	PDAPRGAGALQELDREDLGLIRSIQHAQQCFIITDPSLHDNPIVYASEDFLALTGYASEAVLGRNCRFLQGTGTDPVKVASIRAAVAKGEDVDVTLVNYTAGGEAFWNRLFVAALRDGENNIVNX
Shionodiscus_bioculatus_RCC1991_CAAOSW_4123_1	MRNAPXIRKKFLLESLQQSVSLLKEENEKLKSAIRSHLGDKEADGLLSQQALADAAGAGGGLIASSTADANKVLDDPDFSFIKALQTAQQNFVVTDPSLPDNPIVYATQGFLNLTGYTLDQVLGRNCRFLQGPETDPKAVEKIRTAIEEGSDLSVCLLNYRVDGTTFWNQFFIAALRDAGGHITNYVGVQCKVSDHYAASVCQKQEEADGAALAAAADGAGPKQDS
Shionodiscus_bioculatus_RCC1991_CAAOSW_44678_1	MSSTNNIITAVPDPIPVADAPQAAAPVAAVANGTNNASVSAMQLFAPDPNAGTANDPLELDELFHDCYFGDFGVPEAVTSLTAPAPVAPIIAPNPAVKRTAVQAGLTTTAPAAIVPKLAAPAAPTAPPSLAPVTPSASVPSSSAPPSVSLAPAASLTEPQRKERRDRNREHAKRSRLRKKFLLESLQEQIEGLQSEIHTLKDIIKQELPDKAVELLRGFNDGEDDNDDPSQPKKGAYTPLPMPSGFGPVKTLMEPDYRLMNALSGSQQNFAIADPSLPDNPIVYVSQGFLDLTGYTLDQVLGRNCRFLQGPGTDQAAVDVIRKGVQEGKDTSVCLLNYKADGTPFWNQFFVAALRDAENNVVNFVGVQCEVSKAVVEKHISEGKNPASCLPGA
Skeletonema_grethea_Strain_CCMP_1804_CAMPEP_0201686714	MSPSASCIAIPQYTKAPNNKSIDADCWDNMDSALDFDLLAEYLLEDLGASGGFDFSPENPTVTPPNDNHVQYQVDPGVVTPHQSDPSFFADPLSDPNLLINGDMTKELSQVQQMIATQARAPAPIQQPKVQPQLPQASTNPAVLAPVNAVMAKTKPIAPAPKPVPQTTLVRPLVPNNASQPNKRPRVDVPGVGGGQKAATPSFSLVSASAAAAAAATPSAQTAEDASKPKSQAQIDRRRERNRILARRTRLRKKFFFESLQKDVSDLQRENAALKSIVRSRLKPDDAKALLSQCTANEKLPNIGNDKAAEDENAGGSAAADGDGVVKQLDKEDFNLISSIQNSQQCFIITDPSLHDNPIVYASDDFLTLTGYSQDQVLGRNCRFLQGNETSQEKVALIR…
Skeletonema_japonicum_Strain_CCMP2506_CAMPEP_0201714016	MDSALDFDLLAEYLLEDLGATGGFDFSPENPTVSPPNVSHVQYQVDPGVVTPHQSDPSFFADPLSDPNLLINGDMTKELSQVQQMIATQARAPAPIQQPKVQPQIPQAPTNPTVLAPVMAKTKPIAPAPKTVPQTTLVRPLVPNTSQPNKRPRVDVPGAGGGQQAATPSFSLASASAAAAAAAVAATPSAAQTEDASKPKSQAQIDRRRERNRILARRTRLRKKFFFESLQKDVSDLQRENAALKSIVRSRLKPDDAKALLSQCNANEKLPNIANNKAAGDENAGGNADVDGDGVVKQLDKEDFNLISSIQNSQQCFIITDPSLHDNPIVYASDDFLTLTGYSQDQVLGRNCRFLQGNETSQEKVALIRKAVTGGEDVSVTFANYKSDGTPFWNNLFIA…
Skeletonema_japonicum_Strain_CCMP2506_CAMPEP_0201717912	MSEAASAGKPQPGAGLVGAACAAAQPLVPVPVPSTNTSAMQFFAPDPSDDRDSMQQALDLDELFHDCYFDDLTLPEPVTSASAPIAPDAAPLPPPAAALTTTSAAPAPVAPVKRSAAEAGLADKPQDVTSGGSGSGNESQSDKGTSSKPAASLTESQKIERRERNREHAKRSRLRKKFLLESLQEQIEGLQGEIQSLKDIIKRELPAKAEALLKDIDGGDNSNAAGPKKGDYTPLPMPSGFGPVKTLMEPDYRLMSALSGSQQNFAISDPSLPDNPIVYVSQGFLDLTGYTLDQVLGRNCRFLQGPGTDQAAVDVIRRGVREGTDTSVCLLNYKADGTPFWNQFFVAALRDAENNVVNFVGVQCEVSKAVVDKHIAEGKTPALTDSKK
Skeletonema_japonicum_Strain_CCMP2506_CAMPEP_0201731578	XPPQFIAAGLPGLSASAAAAVQSRGTPSTLNLDDIFGDCFFTPEGEAVFLSENPQMQQVQQAQQQQQAQQQQQQQQAQQQQAQQQLNQQQAAQGSILGSGESAPAQIASRPTQTGYVNVPQGGGIVTTGLHKPKTAATVMGNNVGGAAPTQVPFAQAPQRPHHLQYAYVQAGGAPAAQPAASSVAKRGRSTAVAKAPDTQSKADRSKLVKERNREHAKRSRIRKKFLLESLQQSVSLLKEENEKLKGAIRTHLGDKEADALLSKQALADAASTGGGLIATSAGDANKVLDDPDFSFIKALQTAQQNFVVTDPSLPDNPIVYATQGFLNLTGYTLDQVLGRNCRFLQGPETDPKAVEKIRNAIEEGSDMSVCLLNYRVDGTTFWNQFFIAALRDAGGNIT…
Skeletonema_marinoi_Strain_skelA_CAMPEP_0184918060	MSGNQDQSQNIRPPQFIAAGLPGLSASAAAAVQSRGTPSTLNLDDIFGDCFFTPEGEAVFLSENPQMQQVQQVQQAQQQQQAQQQLNQQQLAQGSILASGESAPAQIASRPTQTGFVNVPQAGGIVTTGLHKPKTAATVMGNNIGGAAPSQVPFAQAPQRPHHLQYAYVQAGGAPAAPPAASSAAKRGRGGAAVAKAPDTQSKADRSKLVKERNREHAKRSRIRKKFLLESLQQSVSLLKDENEKLKGAIRTHLGDKEADALLSKQALADAASTGGGLIATSAGDANKVLDDPDFSFIKALQTAQQNFVVTDPSLPDNPIVYATQGFLNLTGYTLDQVLGRNCRFLQGPETDPKAVEKIRNAIEEGSDMSVCLLNYRVDGTTFWNQFFIAALRDAGGNI…
Skeletonema_marinoi_Strain_SM1012Den-03_CAMPEP_0115977268	XKMNNNMGMKMPMFASANQQQQNGDEFDFHDIFADYFEDFNADQMSNAFAAQQHVQQVVAQQHQQQQQQQAVQQQQQQQLNLPTGQGIQTAWHLGNLPSMNTAANGTTAGGSEEPSAKRTRHDENLLLPGGVGSGATMQQQQQQSQQQQVVQQQQQQPQQTYSVPSGVGALSNRLGFTMPNTVQQQVQQQQQRQQAVHQQQQQQAMQQALQQQATMLSTNMNSNIKLPVGTGINFGTTVGNIMSNNAQTGVAARTHQNGAVIGQSYHQLTSGVGGGAVATSASGGGILPNMQLRTNLGVAMPGIGVDKKSIEEQMSAERRQRNREHAKRSRVRKKFMLESLQTQVRGLQDENSTLRMLVQKHIPLDAMKVIDECCSKSVLFGAEGRGGGALGGAVPPTE…
Skeletonema_marinoi_Strain_UNC1201_CAMPEP_0197204558	MSEATSSAGRKPTPGAGLVGAACAAAQPLVPVPVPSNNTSAMQFFAPDPSDERDSMQQALDLDELFHDCYFDDLTLPEPVTSTSAPIAAAAAPQPTITSAAPAPASAAPVKRSAAEAGLADKPQEVTSGGDSGSEKGTSSKPAASLTESQKIERRERNREHAKRSRLRKKFLLESLQEQIEGLQGEIQSLKDIIKRELPAKAEALLKDIDGGDNSNAAGPKKGDYTPLPMPSGFGPVKTLMEPDYRLMSALSGSQQNFAISDPSLPDNPIVYVSQGFLDLTGYTLDQVLGRNCRFLQGPGTDQAAVDVIRRGVREGTDTSVCLLNYKADGTPFWNQFFVAALRDAENNVVNFVGVQCEVSKAVVDKHIAEGKTPALDTVKK
Skeletonema-dohrnii-SkelB_CAMPEP_0192135592	MDSALDFDLLAEYLLEDLGASGGFDFSPENPTVTPPNVTNVQYKLDPGVVTPHQSDPSFFADPLSDPNLLINGDMTNELSQVQQMIANQARAPPAPIQQPTVQPQLPPAPTNPTAVVAAPAPVMVKTEPIAPAPTAVPQQTLVRPLVPNTSQPNKRPRVDVPVVRGGQPAAQQVAKTSFSLASASAAAAAATAAEQAEDASKPKSQAQIDRRRERNRILARRTRLRKKFFFESLQKDVSDLQRENAALKSIVRSRLKPDDAKALLSQCNANEKLPSIANSGEAGDENGAGSAAADGDGVVKQLDKEDFNLISSIQNSQQCFIITDPSLHDNPIVYASDDFLTLTGYSQDQVLGRNCRFLQGNETSQEKVDSIRKAVKVGEDVSVTFANYTSDGTPFWNN…
Skeletonema-menzelii-CCMP793_CAMPEP_0192261214	MDSALDFDLLAEYLLEDLGASGGFDFSPENPTVTPPNISNVTYQMDPGVVTPHQSDPSFFADPLSDPNLLINGDMTKELSQVQQMIATQARAPAPIQQPKVQPQLPQVSTNPTVQAPVMAKTQPIAPAPTTVPQATFVRPLVPNTAHPNKRPRVDVPGVGGGQQAATPNFSLASASAAAAAATATAAQTEDSSKPKSQAQIDRRRERNRILARRTRLRKKFFFESLQKDVSDLQRENAALKSIVRSRLKPDDAKALLSQCTANEKLPSIANQEAGDENGAGSAAADGDGVVKQLDKEDFNLISSIQNSQQCFIITDPSLHDNPIVYASDDFLTLTGYCQDQVLGRNCRFLQGNETSQEKVALIRKAVKVGEDVSVTIANYTSDGTPFWNNLFIAALRDA…
Skeletonema-menzelii-CCMP793_CAMPEP_0192261464	MSEAAAGNKPQPGAGLVGAACAAAQPLVPVPVPSANTSAMQFFAPDPSDDRDSMQQALDLDELFHDCYFDDLAYPEQVTSTSAPIEAAAPAPVAPVKRSAAEAGLADKPQDVVSSSGGGGGGDSSSEKGTSSKPAASLTESQKIERRERNREHAKRSRLRKKFLLESLQEQIEGLQGEIQSLKDIIKRELPDKAEALLKDIDGGDNSNAAGPKKGDYTPLPMPSGFGPVKTLMEPDYRLMSALSGSQQNFAISDPSLPDNPIVYVSQGFLDLTGYTLDQVLGRNCRFLQGPGTDQAAVDVIRRGVREGTDTSVCLLNYKADGTPFWNQFFVAALRDAENNVVNFVGVQCEVSKAVVDKHIAEGKTPALLDGKK
Stauroneis_constricta_Strain_CCMP1120_CAMPEP_0119555116	MSNEVQKPLFAAASSQGQNQQDDFDLNEIFQDYFISEGFEDPLNAYTSSMANYGGGAASVAITQQAVAGAPATAVSTAPAPMQTNQGMAMNTMMAPVPAPTPVGVPAPAPMDGTFATTAPVAAAPGGIAGMGIATQYQQQQQQQLQFQQQQQQQIQQQQQQQQQQPAAQNKLPTGGIKTTFHATAVNQAAAMAGMPGGGEVQHFQHAAPPTKRTKIQAPLAAPSVGGLTSRLGVPLPMAMAGMPGAGIPQLATHAATSGISLPIGVGIRLGGTGGVAPAKAQAARTSAPGQFQMWGAAQEGAMTDQAIAERRLRNREHAKRSRVRKKFMLESMQEQVLQLQKENQRLRTLVQDNIPEHAQKIISECCQSSPLFADTEGQEEPEKKSSTTLVKSDFSLME…
Stauroneis_constricta_Strain_CCMP1120_CAMPEP_0119556460	MSGVPTFSTDLTGPTAAAVAQRGTPSTLNLDDIFGDVMFTPDGDTVFMSEDGQNGAVLNSGEREVSTMARKRNGDRYIAVQRGGGLHTTQLLDNSKPSLTMGAASAGVMPTNSVPFRKAPQERHHLQYALPKKKSSRSSDRKMSEQQKNERRERNREHAKRSRIRKKFLLESLQQSVALLKEENEKLRGSIRDHLGDDEAHRLLAKPGSEAAPDAALIAASQGAANKVLDDPDFSFIKALQTAQQNFVVTDPSLPDNPIVYASQGFLNLTGYSLDQILGRNCRFLQGPETDPKAVERIRHAIEQGNDLSVCLLNYRVDGTTFWNQFFIAALRDAAGNITNFVGVQCKVSDQYAASVTKQQEEEEGEGAEE
Stauroneis_constricta_Strain_CCMP1120_CAMPEP_0119572860	MSHATVSVPVFGAAATNQTNEAAQGSWNPPETSADSMDFDLLAEYLLDENPAPSNGINFDFNGGGGSGIVSPEQSDDGSMPTTRDFRQQQQQQQQQPSSSATQVKQIITQHAASVAQNQVVAPQQQQQQQLPLATIQQGAMLSQQQQQQQPTISVPMSVPMATAPAPPGAVQHAHIQPAAMAQVPVAAAPIVTAQPLMQQSLAAATAAAKRRRLDANAAAQAPSVLNDPSAMAAALHGRGRKKSQAQIDRRRERNRILARRTRLRKKFFFESLQKEVMDLQRENAALKGIVREKLNGEEGTRILNACDAAEKMPPAVVEACGDQAKEMAQQDFNLVRSIQHSQHSFVITDPSLQDNPIVFASDDFLNVTGYARDDVLGRNCRFLQGTDTSAAKVKQIRD…
Staurosira_complex_sp._Strain_CCMP2646_CAMPEP_0202480588	MASDAPTDNGATFNQAPMFVPSDPDAGMANVDLDDIFRDCYFDDFPVAPFAEPSPVPSSAEESATKPPAKRSADDANLDSNKGEQLTDLQKIERRERNREHAKRSRLRKKFLLESLQEQITGLKEDIEALKNVIKKEIPDRADSILASLMGDREKYTPLPMPSGFGPVKTLMEPDFRLMSALSGSQQNFAISDPSLPDNPIVYVSQGFLDLTGYTLDQVLGRNCRFLQGPGTDQSAVDVIRKGIKEGIDTSVCLLNYRADGTPFWNQFFVAALRDAANNVVNFVGVQCEVSKAVVDQQIAEGKTPSLSS
Staurosira_complex_sp._Strain_CCMP2646_CAMPEP_0202485780	MSTGNNSQGFQQPLFAPSSQNNQGSQLLGDDIDLNEIFADYFINEFEDPLNAYTSSMANYSGAAAAVALAQKQQQVEANAAQAAGTLPTGGIKTAFHTSGGPEAKKARVLTSSGVTMSKSALSDRLGFTMPGTQVARQQQQVQQQPQVQQVQQQQQQTQQQQQQVPKPMPPQPQIVPSKPPTAAPAPGGLPVGVGIRLGGVGGVAPATAQLASAAQANQFIMWGGMNASGQGMSEQAIAERRQRNREHAKRSRVRKKFMLESLQEQVKQLQKENVQLRMIVQQKIPAHAQQIITECCSTNTLFSDPSKNGEKKTEETSLVKSDFTLMESLTSGQQNFVLSDPRLPDNPIVYASPGFYKLTGYTQDQVLGRNCRFLQGPATDPRAVDIIRKAIATGADAT…
Staurosira_complex_sp._Strain_CCMP2646_CAMPEP_0202486568	XIWSLFRDSPETIPSNEEGFGTAPKRAKISHRQESDDVPRPGFGDSVQQPTGLFPPLPVLLPSFPFVTSSALLPESTLTNQILHAPKPTPVAQSSEKKKPLYEKHEARKKRNREHAKKTRDRKKKLEEMLHLKFRALQGENDRLKSLVKSQIPHQAQEIIGECCYRRHKLFPGDDQSSKLVQSDFELIESLTKTRQSFVLTDPRLADNPIVYASPAFLNLTGYAREQVMGRNCRFLQGIDTDHKSVGAIREAIQSGEDGAACLLNYKADGTPFWNQFFVAALCDKEKRIVNFVGVQCEVPGPNEVIDKQAQQHSTKKNPPRPTGELVSPNESNKKPGALPDIKPDTESANDLDVLDWSQLAEILEDDYQDEPVGGIEDETAASEDTSSLLVAGRVSGQS…
Staurosira_complex_sp._Strain_CCMP2646_CAMPEP_0202486846	XIMSIPPQAPLFANNVPNLSASASQAVAQRGTPATLNLDDIFGDVFFTPDGDTVFMGEQQEENCVLASGEKNVANVASRPQGQAFVPVPQAGGLHTTNLDRPGERALAMGVSGQAAPTPATPFQHPPQQTHHMQFAMPNAPVAPQPAQKKRSRSTSSAASARSAERKMSEQQKVERRERNREHAKRSRIRKKFLLESLQQSVSLLKEENDKLRNSIRSHLGTKEADELLQKQLDSGEVGLIASSSGDANKVLDDPDFSFIKALQTAQQNFVVTDPSLPDNPIVYASQGFLNLTGYTLNQVLGRNCRFLQGPETDPKAVEKIRKSIEEGSDMSVCLLNYRVDGTTFWNQFFIAALRDASGNVTNYVGVQCKVSDQYAANVCKKQQEEDDDESEQK
Staurosira_complex_sp._Strain_CCMP2646_CAMPEP_0202499554	MSTVFDMAPSVTLPRFAPSSKSAAPQSGAGTAVFPDGGDFDFDLLAEYLLDEGTSAEGDDSLGLSAFDFSIVSPEQSDAGGTPELDSMPPKANSTVMQVQNIITAHAAAQQKGTAPPTQVQSGMPMAPAPASNHPVHAPIAAAPPSGLVLHQHGAPASAAGGTKRRRMEKQQQPMMAVSSGAVTMKGYMPPEVPPPGRGGSARQKSQAQIERRRERNRILARRTRLRKKFFFESLQKDVMDLQKENAALKEIAKTMLNSAVAKKLLAECDAMEKLPSSVLEACGELSGDIDQQDQNLVKSIQSSQQSFVITDPSLHDNPIVYASDDFLKLTGYSKEEVLGRNCRFLQGTETLASKVEQVRKSVSNGEDCSVTMVNYMADGTAFWNKLFIAPLRDAQNNI…
Stephanopyxis_turris_Strain_CCMP_815_CAMPEP_0195514866	XCMSAAAAHNLRVAHNGGDVVPEPVQSQNQNQTAQCYKKQKTATPLNGKNYQLPAPTFTPNRIAPNPIAPAPAPKVPLAAVPTGVVGSAISERLGISLNEGGQLVMPQRGNQVAPLPNQRTAAPHPGAITLPVGVGIRLGGINGAYHPGKVIQSGGVTLNHAQWQAGPAAGGATNEKGLSAQVIAERRQRNREHAKRSRVRKKFLLESLQEEVSNLQRENGTLRMLVQDKIPENATKIISECCSQSSLFSDSDQNNAENGGSVSPLEKNDFSLIKSLQSGQQCFVLSDPRLPDNPIVYASDGFYNLTGYSREETLGRNCRFLQGPGTDPKAVDMIRNAVSNGTEITTCLLNYKKDGTPFWNQFFVAPLKDSENCIVNYVGVQCAVDPDGGSSVIEDKVN…
Stephanopyxis_turris_Strain_CCMP_815_CAMPEP_0195520794	MNTNTGGYPPPPMFAAASGNNGIPGVSAATAQALQAGKARGNLNLDEIFGDCFFTPDGQTVFLSDLQNGGGHIQSAETVPTTVASKAVAAPPVAATVTTTAPAPTYVPVPPGAGITSTNLDKPGVAASCMGAASGQQPATKTQPQSQVAPRHHMSYVTAGSMLADGKKRRQRPGERKMSDQQKVERRERNREHAKRSRIRKKFLLESLQQSVSLLKEENEKLRDAIKTHLGEEEASELLNSKNLAEQSLIASGANEANKVLDDPDFSFIKAIQTAQQNFVVTDPSLPDNPIVYATQGFLNLTGYTLDQVLGRNCRFLQGPETDPKAVEKIRKSIEDGSDMSVCLLNYRVDGTTFWNQFFIAALRDASGNITNYVGVQCKVSDQYAANVCKKQEEEENEG…
Stephanopyxis_turris_Strain_CCMP_815_CAMPEP_0195538984	MQPVTLPRFMSAGSATNTTNANPPNGEAAQNWTSTVFQQNGLTEGGDQLDFDLLAEYLLDEGTNLSGMGTQIPGAGAKYTTAATSTAATADSEQYVAAVTSHADPLADAHAQLAAGATTYTGSTPDIASDLAQVQQMIAAHAARASVVAQAPAPLSHPSMPSYQNQAAPPTSAVVNAAPGPYPSMVSHQHSAPAPNAPIAVTAPDLSGNKRPLHSIPLDATGQRRQKTEAQINRRRERNRILARRTRLRKKFFFESLQKEVTDLQRENNALKEIVKSKLEPPQASKILEDCKIELPSIVSESCGDANELDRQDFSLIKSLQSSQQCFIITDPSLQDNPIVYASEGFLTMTGYSRDEVLGRNCRFLQGTETMPSKVETIKKALEVGEDVSVCLINYTADG…
Stephanopyxis_turris_Strain_CCMP_815_CAMPEP_0195541754	XAPAAVQAPAQAPVAVQVPAQAPAAVQVPAQVPAQAPAPVQASVQAPMQNSMQPPVQHPLQGSSQTHALAPAQSLPQASAQVPAQLTTSHPGATLTATPAPITQEQHHLVGMFAPQIGVNRDQSESSLDLDDIFVIATLANSQFRXXXXXXXXXXXXXXXYFGEFPVPLPTPVPSAADIQPVANVNTVSVAPTTNINAKRKYDDANGSTASSTLPSFAQPNQILATAPKPVAMLTPSTVTSSSNDFLTSAGSGKDLTEKQKVERRERNREHAKRSRLRKKFLLESLQEQIHGLQSEIETLKNIIKTELPEKAXXXXXXXXXXXXXXXXXXXELPEKAESLLTAVGGKNDSKYTPLPMPSGFGPVKTLIEPDFRLMSSLSNSQQNFAISDPSLPDNPIVY…
Striatella_unipunctata_Strain_CCMP2910_CAMPEP_0118684778	XLDPCPLHQKTLLISTXXXXXXXXXXXPVAPVAPAAPTTPAVPPDPTSIPNTTAFPEQVASADPTAGLNPDSLKKRKQEDIVERRERNREHAKRSRLRKKFLLESLQEQIHGLQTEIDQLCKVLRKELPDRAEELITEVRGKQGEFTPLPMPSGFGPVKTLMEPDYRLMSALSGSQQNFAISDPSLPDNPIVYVSQGFLDLTGYQLNQVLGRNCRFLQGPGTDQNAVDVIRRGVREGVDTSVCLLNYKADGTPFWNQFFVA
Striatella_unipunctata_Strain_CCMP2910_CAMPEP_0118686276	MSGAQNVHNGVTIPVFTSSGQQQGTGGDDLDLNEIFADYFISEFDDPMNAYTGGMANYGGAVSALAKSQNQIFTLTGNSALNANRSAINVGSIGGAGKGIKTPFHAGVNMQALPQPGILNSAVPPPKKVKLGEVQHLAQQATQVVQQHQQQQQQQQQTTGIPSQLGAQPAASAGGSGISGRLGFAIVGGQVAVPPATAPAPAVQPAPGAVQLPVGVGIKFGDITGVPGQFQMFHSGVGPEQSVAERRQRNREHAKRSRVRKKFMLESLQEQVSLLQKENTQLRMLVQEKIPQHAQKIIGECCVRSPLFGDPEAMDDKDTELVRSDFNLIESLTSGQQNFVLSDPRLPDNPIVYASPGFFELTGYSREQVLGRNCRFLQGPGTDPRAVDVIRAAVGNGSD…
Striatella_unipunctata_Strain_CCMP2910_CAMPEP_0118687858	MIPVSIPRFAPASGGENIILTAPTTWTQLTDGDLDVDMLAEYLLDDGTASSAPNSGLMFDFSMDPNALNSGVVSPEQSEAEGASGESSNGQHSGQGVGARSASSTNMEQLQQALAARSTALEKQQAAVSSTVVQAPPTKIAAPLGAQVVQVVHQPAGATVFHMPGQIPLAPTLLSGGTQQMPADAHMLIAQQANSRHKRPRIDQPLIASTTGTLVTVDGQNIFPGQISRGGRQKSQAQVDRRRERNRILARRTRLRKKFFFESLQKEVIDLQKENMVLKDMVKTKLPSEKSKSILEECKAGDKLPSVVSDVCGEETELDQRDFSLMQSIQSSQKCFVITDPSLQDNPIVYASEDFLSLTGYARDDVLGRNCRFLQGTETSTTKVEEMRKGLAAGEDVSV…
Striatella_unipunctata_Strain_CCMP2910_CAMPEP_0118711266	XGDPSQVPQGSNPTGIPDINTMFAPSAGPVLANLMQAPSENPVDLDELFRECYFGDFPVPPFAKQGVNAQEAAAPVAPVAPAAPTTPAVPPDPTSIPNTTAFPEQVASADPTAGLNPDSLKKRKQEDIVERRERNREHAKRSRLRKKFLLESLQEQIHGLQTEIDQLCKVLRKELPDRAEELITEVRGKQGEFTPLPMPSGFGPVKTLMEPDYRLMSALSGSQQNFAISDPSLPDNPIVYVSQGFLDLTGYQLNQVLGRNCRFLQGPGTDQNAVDVIRRGVREGVDTSVCLLNYKADGTPFWNQFFVAALRDAENNVVNFVGVQCEVSKAVVEKQMTEGKTPPSVIM
Striatella_unipunctata_Strain_CCMP2910_CAMPEP_0118725098	MTSFPPAPAFAAPRGEDVPGLSASASAAIAARGTPATLNLDDIFGDVLFTPDGDTVFLNDQPESVRSEILGSGEAVISNHASRQDGKKFVPVAMATGIAGTQLDKPGMPSTVMIGTATSPAAQVGFKQPPQQRHHLQYASAPVMKKRSRRSGGSSSSSERKMSEQQKVERRERNREHAKRSRIRKKFLLESLQQSVTLLKEENDKLRNSIRSHLGKEEADGLLSQKSMEAAAGSLIANTAGDANKVLDDPDFSFIKALQTAQQNFVVTDPSLPDNPIVYASQGFLNLTGYSLDQVLGRNCRFLQGPETDPKAVEKIRKSIEDGSDMSVCLLNYRVDGSTFWNQFFIAALRDANGNITNYVGVQCKVSDQYAANVCKKQDDDEDEDDEEKEADNNTMEQ
Synedra_sp_RCC2510_BAXOSW_20454_1	MIKPEKEGLAPQQWEEEKKESSPRRAPQETHEGLPTVIMGKKYNSELQLIGDLEELGVRDLQIVLDREGIAVWREMPGEQHRVAVEDIIDQFDEWKDGRGLKGQKEANVFVNDSFNTPKNHLRVADFAIFGPDRLQGRKIRKLGKLCFNPHIIVQFSWTNDIVKESLAVDDVMHHAGVGEYSGLGRPNTAYLIKAKIRGKESDSPVYGFDIFVVGQGEDTPEEPTMKYRVGVVGQEDAAISVSTTAMGLDDDEGEPFKIEMRSIREELEALETIFVAANENEMXKLVDLNRLFLPNCRDRTASISGWSSKPNGDMSNVSSQFVIEDISGSFLRASGGSARDDITMSDTIYQGVFLKLITSNIFSAFVDGNFAAVIFFAIVLVLPWAASSSRKPMFGHDL…
Synedra_sp_RCC2510_BAXOSW_3158_1	MGDDIDLNEIFADYFINEFDDPLNAYTNSMANYNGAAAAVALAQKQQQVDAAQAAAPTQTLPTGGIRTAFHTAAAPTTGNGAGVGGEPTPKRIKMVPVGSSQQQQQQQPNVLAIPGAPVIGKGAISGRLGFSMVGGQLALPHQQQLQAQQQQQQQQQPGLPHPVKQAAASTGVALPVGVGIRLGGIGGVAPSMAQAAPRAGHFMMWGGPGGMGGAPGEAAGAMSEHAIAERRQRNREHAKRSRVRKKFMLESLQEQVRGLQKENTELRMLIQEKVPQHAQSIIAECCSKNSLFSDPGAGDSGAEAKPGRKETSLEKSDFSLIESLTSGQQNFVLSDPRLPDNPIVYASPGFYVLTGYTQDQVLGRNCRFLQGPGTDPRAVDIIRTAIANGSDATTCILN…
Synedra_sp_RCC2510_BAXOSW_48025_1	MITVSTMLPITLPRFASSSGGAPQSAAPQSSVPSWGASHSSDTQAADPLDFDLLAEYLLDDAAAMGTNAAGMPDFDFSEANVGSGVVSPEQSEDGFPPIADSTPHTMRAPVSVPRMMVPTPLAPQLPPQLVPQQPVLAPAPRPTIASQGMSLPHHPGMPMGPAGTFPPLPAPVPARMAAPQGMVLHQHGPPLANTIPGNKRRRVDMPAQVMAAPAAAQAQLISGHLAAQAAMAGRGRQKSQAQIDRRRERNRILARRTRLRKKFFFESLQKDVTDLQRENLILKELVRKKLDPEVSKELLAGCKAMEQLPSAVHEAVGEGADIDGQDFNLVRSIQRSQQCFVITDPSLQDNPIVYASDDFLTLTGYQREEVLGRNCRFLQGTETSAQKVEQVRKAISMG…
Synedra_sp_RCC2510_BAXOSW_56237_1	MSADAPMFAPTEPGMSSAASVAVAQRGTPATLNLDDIFGDVLQDHHDNEDLRSFFFDLFKPPLPETMSADAPMFAPTEPGMSSAASVAVAQRGTPATLNLDDIFGDVLFTPDGDTVFLSDLQGEDASGVMASGEGDNVATVASRMGADGKNVAVAKAGGIQTTNLDQNGKPALVMGAAGGAASAAVPFKQAPQQRHHLQYATPEMMNAMKKRKAAGSKTADRKMSEQQKVERRERNREHAKRSRIRKKFLLESLQQSVSLLKDENEKLRQAIRSHLGAAESDELLGKQFGAGEVGLIANSAMDANKVLDDPDFSFIKALQTAQQNFVVTDPSLPDNPIVYATQGFLNLTGYTLDQVLGRNCRFLQGPETDPKAVEKIRRSIEEGTDMSVCLLNYRVDGT…
Synedropsis_recta_cf_Strain_CCMP1620_CAMPEP_0119012562	MSTNAPMFAPTEPGMSNAATAAVAQRGTPATLNLDDIFGDVLFTPDGDTVFLSDLQGEDAGAVMGSGEGDTVATVASRVGADGQTVAVAKAGGIQTTNLDQNGKPALVMGGVAGGASAAAVPFKHAPQQRHHLQYATPEMMNAMKKRKAAGSKTADRKMSEQQKVERRERNREHAKRSRIRKKFLLESLQQSVSLLKDENEKLRQAIRSHLGAAESDELLGKQFGTGEAGLIANSVMDANKVLDDPDFSFIKALQTAQQNFVVTDPSLPDNPIVYATQGFLNLTGYTLDQVLGRNCRFLQGPETDPKAVEKIRRSIEEGTDMSVCLLNYRVDGTTFWNQFFIAALRDASGNITNYVGVQCKVSDQYAANVCKKQDEDEGLGEEE
Synedropsis_recta_cf_Strain_CCMP1620_CAMPEP_0119013412	MTTVSTMLPITLPRFASAGAPQSAPQSSAPQWGAAAANNNDGQQGDPLDFDLLAEYLLDDAAAVGTNAAGMPQFDFSEANVGSGVVSPEQSEDGFPPIADSTPRMMHARVAVPRAAPRPVPLAAQVLPMQPLLAPAPPTIASQGMSLPHPGMPMAPAGTFPSLPTPVPLTMAAPPGISQGMVLHQHRQHAPALVNSIPGNKRRRVDMPTQVMAGPPSAQAQLISGHLAAHAAMAGRGRQKSQAQIDRRRERNRILARRTRLRKKFFFESLQKDVTDLQRENIILKELVRKKLDPEVSKELLAGCKAMEQLPSAVHEAVGEGADIDGQDFNLVRSIQRSQQCFIITDPSLQDNPIVYASGDFLTLTGYEREDVLGRNCRFLQGTETSTQKVEQVRKAIST…
Synedropsis_recta_cf_Strain_CCMP1620_CAMPEP_0119020722	SSISASITIIKMSANEAMPPPADGTSAVPMFAPSDPNASAASASGNVDLDELFRDCYFGDFPVAPFGGPSVIPPAGGEAPVVGLLDDDAAGAKRSADDAGLDLKSTKNLTDQQKVERRERNREHAKRSRLRKKFLLESLQEQIHGLQAELETLKDVIKKELPEKSEAILKQLEGDREKFTPLPMPSGFGPVKTLMEPDFRLMSALSGSQQNFAISDPSLPDNPIVYVSQGFLDLTGYTLDQVLGRNCRFLQGPGTDQSAVEVIRRGIREGVDTSVCLLNYKSDGTPFWNQFFVAALRDAENNVVNFVGVQCEVSKAVVEKQMSEGKTPSSAFASANSDI
Thalassionema_frauenfeldii_Strain_CCMP_1798_CAMPEP_0178903604	MEVVRAFLMDFAGNNINEEEDYLTTPPHLLGDSDSNDSEEAPPSKRTKLDETGAYLLVPLGGNKSSKPITPAPIPSRQYHSAAPVSSDFGLSVPCPIQITDPAPAPSATTTMTSSQHQQKQQQQQQVMIPTITTTKINNVATNPAPAPMAAAPVGAAPAPASTMELSNISVISQQQQQQLSMVQSGSFPLQPSGIMYPQQFIAANPSAVQQQQQQQYQVVTTYAIPTQPKLSLTTGTKSVQPLQLNAVKSGIITNNNNNMTTKMSPQSIPAPAPLAAPQQLTTPQPQQVISAPTPMVPLSLHNAATVSSRNPTTTTTTTTRNVVLDPESLRKQQKRKRNAEQAKKTRERKKQASQLLSLEFYSLQRENEHLKSLIHSQLPDQAQEIIGDACYTTRKWSG…
Thalassionema_frauenfeldii_Strain_CCMP_1798_CAMPEP_0178912086	XFQLLVLYQEGKLFKAFVNESIYTCVIVVIFTTSLVAGKERASALIPEEKRIRRRTNYARSRGEKSLEPRGRLLESTLERNIGFXTTAFGTEMSGNALNHGVQQPLFAPVSQQQGNQLGDDIDLNEVFADYFINEFEDPLNAYTNAMGNYSGVAAALQQQQINQQAAQILTGGTPNPLATAPAPLPTGGIRTAFHMKQAAANNGQITAEEPAAKKIKIEPDGQPQLAQVPPNIGQGGITGRLGYSMIGGQLVQQQQPAAPSAAAPQPTAAPGPGGVALPVGVGIRLGGVGGVAPSTVRAGQQYSNLWPQKNSGNMSEQQIAERRQRNREHAKRSRVRKKFMLESLQEQVRSLQKENVELRMLIQEKVPDKAQSIISECCSKNTLFDDPSTEDSDNKSKK…
Thalassionema_frauenfeldii_Strain_CCMP_1798_CAMPEP_0178926342	MSSAPVFAPTEPGLSSETIAAVAQRGTPATLNLDDIFGDVLFTPEGDTVFMNEIQGASGEIVNSGEGEKVANVASRVIESGQAVPVPKAGGIQTTQLDQSGKPALVMAAGQAPIPAAPYKHVPQQRHHLQFATPDVMNAMKKRKGGSKSADRKMSEQQKVERRERNREHAKRSRIRKKFLLESLQQSVALLKDENEKLRSSLRSHLGEAETEELLGKKLGSGEAGLIANSTMDANKVLDDPDFSFIKALQTAQQNFVVTDPSLPDNPIVYATQGFLNLTGYTLDQVLGRNCRFLQGPDTDPKAVEKIRRSIEEGSDMSVCLLNYRVDGTTFWNQFFIAALRDASGNITNYVGVQCKVSDQYAANVCKKQEEEDNNSASNAGETEESG
Thalassionema_nitzschioides_Strain_L26-B_CAMPEP_0200206256	MTSWNGVQQPVFAPVSQQGNQLGDDIDLNEVFADYFISEFEDPLNAYTNAMGNYSGVAAALQQQQITNTLNAQTAAHTILTGQTPNPLAAVPQHPGAPTPNPLPTGGIRTAFHTKQVVAAPPSAGGNNGSVQQYLVANQQHQQQQPAVKKIRTEAGAAQPQFAQVPTNIGRGGITGRLGYSMIGGQLVHQAQQQQQAAVAAVPQPAPGGGGVQLPVGVGIRLGGIGGVAPSTVRPGQQYSNWPQQNQANMSEQAIAERRQRNREHAKRSRVRKKFMLESLQEQVRGLQKENVELRMLIQEKVPDKAQKIISECCSKNTLFHDPTDGTPDDEKKGKDTTALERSDFSLMESLTSGQQNFVLSDPRLPDNPIVYASPGFYTLTGYTPEQVLGRNCRFLQGP…
Thalassionema_nitzschioides_Strain_L26-B_CAMPEP_0200213670	MSSAPLFAPTEPGLSSEAIAAVAQRGTPATLNLDDIFGDVLFTPDGDTVFMNEMQGGSGEIVHSGEGAKVASVASRVVENGQAVPVPKAGGIHTTQLDQTGKPALVMAGAGQGPVPAAAPFKSVPQQRHHLQFATPDVMNAMKKRKGGSKTADRKMSEQQKVERRERNREHAKRSRIRKKFLLESLQQSVALLKDENEKLRSSLRTNLGEAETEELLGKKLGSGEAGLIANSTMDANKVLDDPDFSFIKALQTAQQNFVVTDPSLPDNPIVYATQGFLNLTGYTLDQVLGRNCRFLQGPDTDPKAVEKIRRSIEEGVDMSVCLLNYRVDGTTFWNQFFIAALRDASGNITNYVGVQCKVSDQYAANVCKKQDEEDNENAENENADNETDE
Thalassionema_nitzschioides_Strain_L26-B_CAMPEP_0200214512	MTSVSMMPVTLPRFAPPAPKQRNPSQTSQAAVWAAANGDYQNGSDSLDFDILAEYLLDDSAASGLKMGLPQFDFSDVTNGSGVVSPEQSEDGSPYLDNAFVANQGAPVASTMSIAANAVSYAAPGPIPPQHPVLAPVPPQSGMPMPPAPAVSSFPSLPAAIPTQMPSSHGVVVHQHASLAVPATIPPNAKRRRVNGTAPPIANGQIVTGRGRQKSQAQIDRRRERNRILARRTRLRKKFFFEGLQKEVIELQRENSVLKDLVRKELPPELSKKLLEESKAMEQLPSAVHEAVGENATDMNSQDFSLVRSIQSSQQCFIITDPSLQDNPIVYASDDFLTLTGYERGEVLGRNCRFLQGTETSPQKVEQVRKAISLGEDTTVTFINYTKDGTAFWNKLFIA…
Thalassionema_nitzschioides_Strain_L26-B_CAMPEP_0200215076	MEVLRAFLVDFAGNNTNNTTSSDSRKTPPQLVESNNSNYYDDQLMMDFNEEEEHHHQQQHNNLEDDEEEEPCQKKARLDKTGAYLLVPLGGGPPKQQQHHHHLLTNKNVVVATTTTPLSSSPTSSSNNNNNPLQQHHSYFSAAAESTPRTMAAPLPFSVPCPLVNHTTTGISTVGVHNPLLASQQQTQTTSEQHQAMQQQQMLQQQQAQMQFQHPPVVAAMPPAPLTLSSTTATTTTTSTNNINNMQQIVSSNANMNPQQQLSQQQQQQLHHHQQQQVAASFVPSQTTSMVSPMTTTSTTPMAQQQHQHHPFPMATYQHPQLSLNTTTTTTANKSSSSSQPPAMLTSIVHRNHVMKPNGVSSYHTTTLPPPPAPSHITSSSFPQQQQLSLHTQQHPNTT…
Thalassionema_nitzschioides_Strain_Unknown_CAMPEP_0205840326	ASATMVPAAKTAPATQGDSDQLSGKRTADEANLNDFSGNTKQLTDQQKVERRERNREHAKRSRLRKKFLLESLQEQIHGLQGEIETLRGIIKKELPEKADEILKELSGDKDKFTPLPMPSGFGPVKTLMEPDFRLMSALSGSQQNFAISDPSLPDNPIVYVSQGFLDLTGYKLDQVLGRNCRFLQGPGTDQSAVEVIRRGIREGVDTSVCLLNYKADGTPFWNQFFVAALRDAENNVVNFVGVQCEVSKAVVEKQMAEGKRPTGCK
Thalassiosira_antarctica_Strain_CCMP982_CAMPEP_0200093356	MSDNQNQSQDANIRPPQFIAAGVPGLSASASAAVQARGTPSTLNLDDIFGDCFFTPEGEAIFLSENPQLQQQVQQQQQLNQQQQQHQQQAQQQQLLQGALLASGEAAPSQNASRPAGGAGYAPVPQAGGIVTTGLHKPNASATVMGNVSGNAAPPAVPLAQAPQRPHHLQYAYVKASGTESPASGSMGGGSASAGGAKRGRGGASISGMAKTEGTTKADRSKLVKERNREHAKRSRIRKKFLLESLQQSVSLLKEENEKLKGAIRSHLGDKEADALLSKQALADAAGTGGGLIASSSADANKVLDDPDFSFIKALQTAQQNFVVTDPSLPDNPIVYATQGFLNLTGYTLDQVLGRNCRFLQGPETDPKAVEKIRNAIEEGSDMSVCLLNYRVDGTTFWN…
Thalassiosira_antarctica_Strain_CCMP982_CAMPEP_0200104980	MSSDLSALPDPIPVGAPQAPAAAAPPAAANGTTNAHASAMHLFAPDPNGGENEPLDLDELFHDCYFGDFGVPEDVTSESAMAIPAPIPIAAPAAPITAKRTADQAGLNTTTIPAPASAVAPAQAAKPAPIPSPIGSDDGMGVSTKPAASLTESQKIERRERNREHAKRSRLRKKFLLESLQEQIDGLQSEIHTLKDIIKRELPDRASELLKDLGDGEGEKDDPSQPKKGSYTPLPMPSGFGPVKTLMEPDYRLMSALSGSQQNFAISDPSLPDNPIVYVSQGFLELTGYTLDQVLGRNCRFLQGPGTDQAAVDVIRRGVREGTDTSVCLLNYKADGTPFWNQFFVAALRDAENNVVNFVGVQCEVSKAVVEKHIKEGKTPESSMPAAGT
Thalassiosira_antarctica_Strain_CCMP982_CAMPEP_0200120460	MAPAAVATSIPQFTGHSNNKFSNETSHLRESSEWNNNMESALDFDLLAEYLLEDMGAGGFDFSVSSDTVSPPIIDAQKTQPASILPDPGVVTPGSHQSDTSYYVDPLSHVTAQLQHPQQGGGGVGAVPAPLPASGDLAGELSRVQQIMIATQQQQHLQQARNNNAMVSPPQQPLAQQLTESQIRPLPLTQPLAPNRMAVHHPLQQQPKPAAPAAVPVTVTAPIFQRAPMPKNANSTMSTAQQPPNKRARVSAAPSIAKKPPGSYSFASSVASVNGSAMRATNAARGTPLALPPHQQPGIPGMGGSGHNKSQAQVDRRRERNRILARRTRLRKKFFFESLQKDVADLQRENAALKSIVRSRLKPDDARVILEQCNANERLPSAIHAKEIDGMGGGDGASG…
Thalassiosira_antarctica_Strain_CCMP982_CAMPEP_0200121508	MSNANNFLQNMGMQMPMFASANQQTTNSDDVDLHDIFADYFNEDGTNINSNANVDLFSNAFNMAQQQQQQQQQQVVVQQQQVVQQVAQQQQVTQQQQQQQLAANHQQQLAANIAVAVAQQQAAQQQAVQQQQLSLPTGQGIKTAWHTGSLPSMQQQQQQGVSTGGNNNSIQQHPQQQPPAAKRLRGEDMFLPGQQQQQQQQQQHQQPLGQTNMGGIGGGNNLAITQQQLALAQAASGVGALSGRLGFTLPNNNNAGIMGGVVGGGGGSNMMGQQAQQQGITLPTQQQQQQQVPTQQQVPQQHQQQSVASINLPIGMGINPMGIKVSPMNIIPQAQAQARAPGIQVGIHHNVGGLLNGNVAASSGIHHNIVAVAGNNGVMNNNTVMTNNNPIIAQGALAA…
Thalassiosira_gravida_Strain_GMp14c1_CAMPEP_0200708522	MMSADFTAVPDPTPVGGPPQSVVAAPAAAAHGTTNNSGNTSAMQLFAPDPNAVSEGEPLDLDELFHDCYFGDFPLPEDVTSGPAMAAITTPAHIAPIIAPAPAIKRTAEQAGLTATAQPAAQRPAPTSSALITATPQPLAPQPGVAPSSTTAVSIKLEPTPVPSSILYTSGGGSSGGSANGGTNQAGGLLGAISTKPAASLTESQKIERRERNREHAKRSRLRKKFLLESLQEQIEGLQDEIHTLKDIIKRELPDKATDLLKDIGDHEYEGNDDDPSQPKKGSYTPLPMPSGFGPVKTLMEPDYRLMSALSGSQQNFAISDPSLPDNPIVYVSQGFLILTGYTLDQVLGRNCRFLQGPGTDQAAVDVIRKGVREGTDTSVCLLNYKADGTPFWNQFFVA…
Thalassiosira_gravida_Strain_GMp14c1_CAMPEP_0200724708	MAPAAILATIPQYAATNNKLTSNETHLRESSNWNNMGDSALDFDLLAEYLLEDMGAGGFDFGASAEAVSSPFIDTLKTQSASVLPDPGIVTPNPNQDRPAFIDPLTDVTTQLQQPQALPAGGDLAGELSQVQQMIAATQQQQQATDAGIVAAPQPPLAQPPAQPQTQMAVPHMMTQQQPVAPVMMGMRHASPQQQPKLAPAAPIMAAAPVPVAAAPITQQQCAPPMVPKVAPMTQPPNKRPRVSAAPSIVKAKPSYSFATSVASVNRNNALRITAGPGGAPLPIPPPHNGIPGMGGRQNKSQAQIDRRRERNRILARRTRLRKKFFFESLQKDVADLQRENAALKSIVRSRLKPDDARALLSRCNANERLPSAIQHDADGVPIGAVGGIDGAGVKKLDK…
Thalassiosira_miniscula_Strain_CCMP1093_CAMPEP_0201031666	MSADIAAVPDPTPVSSAPAPQAPAAAAPAAANGTNGANSGNASAMHLFAPDPNAGTENEPLDLDELFHDCYFGEFSVPDAVTSDPTMAIPPPTQPAPVTSLPTKRSAEQAGLTTSVAPAAPVASSAPTAPPPVAPVATAASTAKPVPVPSAVPSSVPSAAPLSSGGGISTKPAASLTETQKIERRERNREHAKRSRLRKKFLLESLQEQIEGLQSEIHTLKDIIKRELPDKAKDLLKDLGDETGGKEDDPSQPKKGAYTPLPMPSGFGPVKTLMEPDYRLMSALSGSQQNFAISDPSLPDNPIVYVSQGFLDLTGYTLDQVLGRNCRFLQGPGTDQAAVDVIRRGVREGTDTSVCLLNYKADGTPFWNQFFVAALRDAENNVVNFVGVQCEVSKAVVEK…
Thalassiosira_miniscula_Strain_CCMP1093_CAMPEP_0201041828	MAPAAVATSIPQFAANNKLLSTQTHLRESSEWNNTSNMESALDFDLLAEYLLEDMGAGGFDFSAIPDSTTSPTIDAPTTVVPDPGVVTPHQSDTRTFVDPLSDGTAARLQQPDVGANVTPPLPANGDLAGELSQVQQMIATQQQQQQQQQAITDAAVVAQPQQPQPLAPAPAQPAAPPAPTLTAVRYTQQPQPAAPPAAAPVMAPAATIPQPRAPIAMAQPPANKRPRVSAAPSLAAAPPKKGPATYSFAASVASVNGANHAMAPQQLVRAGAGAGAGGPNNKSQAQIDRRRERNRILARRTRLRKKFFFESLQKDVADLQRENAALKSIVRSRLKPDDARVILERCNANERLPSAIHAKDVDGEGPVAAMAGAIGASGMSDPGVKKLDKEDFSLIQSI…
Thalassiosira_miniscula_Strain_CCMP1093_CAMPEP_0201043494	XQDANIRPPQFIAAGVPGLSASASAAVQTRGTPSTLNLDDIFGDCFFTPEGEAIFLSENPQLQQQVQQQQQLNQQQAQQQQQQQQQQQQQQQQQQQQQLSQGTLLASGEVAPSQSASRPSGAAYAPVPQAGGIVTTGLHKSNASATVMGNVSGSAAPPAVPFSQAPQRPHHLQYAYVKAGTQAPAVGSTSAAGAKRGRGGSAISGGAKSEGAAKADRSKLVKERNREHAKRSRIRKKFLLESLQQSVSLLKEENEKLKSAIRSHLGDKEADALLSKQALADAAGAGGGLIASSSADANKVLDDPDFSFIKALQTAQQNFVVTDPSLPDNPIVYATQGFLNLTGYTLDQVLGRNCRFLQGPETDPKAVEKIRNAIEEGSDMSVCLLNYRVDGTTFWNQFF…
Thalassiosira_miniscula_Strain_CCMP1093_CAMPEP_0201085150	MSNANNFLQNMGMQMPMFAAANQQATASDDVDLHDIFADYFNEDASNLNNSNADLFSNALSMAQQQQQAQQQQLAANMAVAQQQQQQMSLPTGGIKTSWHSGALPAMQQQGDSQQQPAAKRSRGEELYLPGQQQQQQQQQNKDLLAFWALPAMQQQGDSQQQPAAKRSRGEELYLPGQQQQQQQQQQQSNMGGITQQQLALAQAASGVGALSGRLGFTLPNNNGAGGINSSSMIGQQAQQQVLQTQQQVTQQGGISLPIGMGVKFNPMGNVIQHGAAGAPGMQANGNGASAGLNNGIIGNSGVMSTQGALAGNRIAVTNMQYGMNPQLQIIDKSRVEDQMAAERRLRNREHAKRSRVRKKFMLESLQQQVRGLQEENSTLRLLVQKHIPTEALKIIDEC…
Thalassiosira_oceanica_CCMP1005_EJK47540	MALQWLSFSWGRLGWLAQWTLTAWWQWTETSWSYFIMGRLGNRGRCPLVPQRRLLSLRTSEGPSNLLTDHRPARAPRQVRHHQASNTSATSLVRSSGSDSTSQEIASQQQPTAPTEGWDEENDDVGGGGGDDIDIHDIFSDYFNDTGGEQQQQQLQQQQFHQAQANLGGGLSLPTGQGIKTAWHSGALPSMQQQQQQQQQQQQLQQPPAKRQRNDVSEAMYLPSAADQQLQLFQEQQRQYIARNQAQQASNGIVTAQQIALAQAAVGAGGLSDRLGFTLPTSHAHATSNGVQAAVQAAASGINLPVGMGLRFGAGGISQQQTLQNFGTNTSVLQAALGGGPLHVTNVQYGVNPLQQQHVVTKHLNPEESTQTERRLRNREHAKRSRVRKKFMLESLQQQ…
Thalassiosira_oceanica_CCMP1005_EJK65981	MPLSSERQELMRKNQQDSFNHFQLHKCRRDSERQACREFLPSSSSSTRRGERTASALLVGLLCWCVSPLYHLNGVSMTDNQGNANIRPPQFTAANGPGLSAPTSAAVQNRGTPSTLNLDDIFGDCFFTPEGDAIFLSENPQLQREVQQQQQLTQQQQQLAAAAAQAQAQAQGLVPSGESTPSQNASRPVGAGYQPVPQGGGITTTGLHRPNTNATVMGKPIAATAPAQVPLAQPPQRAHHLPYATVGPAYVQAGGQTAAPTVPATMATPASATATSNAGKKRAIGTSAATATKPPVEKKSMDRRERNREHAKRSRIRKKFLLESLQQSVSLLKEENGKLKNAIRTHLGEKEAEALLNKQALADAASSGGGGLIANNKSDANRVLDDPDFSFIKALQTAQ…
Thalassiosira_oceanica_CCMP1005_EJK75561	MSGSENKDHMPDPTPVSATQEAPAENNNTSAMQLFAPDPNAPGESVSVFIDYHALIRVSLELQQPHPNLMTLPARGLQAALDLDELFHDCYFGDFPMPEEVTSSTAPAEPVVSKPAAAEPAKSEPTAPKPVAPKRSADQAGLDASSGRRPSRNSARKPAPSTERGLSTRPAASLTESQKTERRERNREHAKRSRLRKKFLLESLQEQIDGLQGEISTLKSIIKRELPDRAAALLKDIGDSDEADSAAPNKGSFTPLPMPSGFGPVKTLMEPDYRLMSALSGSQQNFAISDPSLPDNPIVYVSQGFLDLTGYSLDQVLGRNCRFLQGPGTDQAAVDVIRRGVMEGTDTSVCLLNYKADGTPFWNQFFVAALRDAENNVVNFVGVQCEVSKAVVEKHISEG…
Thalassiosira_pseudonana_CCMP1335_Thaps3_20065	FVLSDPRLPDNPIVFASPGFYKLTGYTRDQVLGRNCRFLQGTGTDPKAIDVIRTAIANGTDATTCFLNYKADGTPFWNQLFVAALRDADNCIVNYV
Thalassiosira_punctigera_Strain_Tpunct2005C2_CAMPEP_0172530532	MAPAALAIPQFAAGPYTAPDKISNDETPWNSSNAAMGDCALDFDLLAEYLLEDMGSGFDFGASPEAVATSTIDTLKTQPTAVVLPPQDPTAVVTPNPISDKPAFVDPLALADVAAAAQLQQPQPSQGVPAPLPAGGDLAGELSQVQQMIAATQQQQATNAGAVAAPQQPHLAQAPPAAQPQPPLAQHQQAPQAAPQPQLAARPLTQPVAPTMMSVRHPPPQQPKPAPAAPVAVGAPAPITQQRAAPSMAQPLQANKRPRVAPPPVAAKSKVGGYSFAASIASVNGANGAMRASAIPPTAAHHAIPGVGGRQNKSQTQIDRRRERNRILARRTRLRKKFFFESLQKDVADLQRENAALKSIVRSRLRPDDARALLSRCDANERLPSAIQHDGEGIPLGPA…
Thalassiosira_punctigera_Strain_Tpunct2005C2_CAMPEP_0172554842	MSNANNFLQNMGMQMPIFAAATQQTTNSDDIDLHDIFADYFNEGDATAANNADLLSNALATAQQQHQVQQQHHLAQAQQQQAQLAANHQQQLAVNAAVAQQQAQQQQQQHQVSLPTGSGIKTAWHSGSLPAMHQQGSSGSNNSNSTQQPPAKRSRGEELFLPGQQQQQQQKQLGESSMAGQNNVGAVGGGTNGVTITPQQLALAASGVGALSNRLGFSLPNNANFGIGANSGNMMVQQQQQGISQASVQQQVATSGGITLPVGIGIKFGAGGNILPQAQAGMQAGGGLGNGVMTNAHSATAMAQGAVAVSNMQYGINPNFQLMDKGKVEDQMAAERRLRNREHAKRSRVRKKFMLESLQQQVRGLQDENSTLRMLVQKHIPTEALKIIDDCCSKSVLFA…
Thalassiosira_punctigera_Strain_Tpunct2005C2_CAMPEP_0172559148	MSENQHQPQDANIKPPQFIAAGVPGLSASASAAVQARGTPSTLNLDDIFGDCFFTPDGEAIFLSENPQLQQQVQQQVQQQQQQQQQLNQQQQQQQQLSQGALLSSGEAAPSQNASRPAGATGYTPVPQAGGIVTTGLHKPKAPATIMGSASGNVAPPAVPFAQAPQRPHHLQYAYVKAGGAGIQATASGSTQAGGSAKRARAGAPNSGGAKSEGTSKADRTKLVKERNREHAKRSRIRKKFLLESLQQSVSLLKEENEKLKSAIRSHLGDKEANALLSKQALADAAGAGGGLIASNSSDANKVLDDPDFSFIKALQTAQQNFVVTDPSLPDNPIVYATQGFLNLTGYTLDQVLGRNCRFLQGPETDPKAVEKIRNAIEEGSDMSVCLLNYRVDGTTFWN…
Thalassiosira_punctigera_Strain_Tpunct2005C2_CAMPEP_0172559604	MSTELPEPAPLPEPAPVGVSLPQAAVVAAPTANGMTTTTTNNTGNASAMQLFAPDPNAEGEPLDLDELFHDCYFGDFPLPEDVTSGAAALADPAPIAPIVAPAPAVKRTAEQAGLAAPAAAPAAPAVRAATSITTAAAASSSAAAVKLEPGAAAVPAPVPSVVPSGGGGGAVGGLNPAGEGPEPISNRPAASLTESQRIERRERNREHAKRSRLRKKFLLESLQEQIEGLQGEIHTLKGIIKRELPDKASELLKGLEEDDLGGRDDPSQPKRGAYTPLPMPSGFGPVKTLMEPDYRLMSALSGSQQNFAISDPSLPDNPIVYVSQGFLDLTGYSLDQVLGRNCRFLQGPGTDQAAVDVIRRGVREGTDTSVCLLNYKADGTPFWNQFFVAALRDAENNV…
Thalassiosira_rotula_CCMP3362_GGLQ01033798.1_1	MSNANNFLQNMGMQMPIFAAATQQATTSDDIDLHDIFVDYFNEDNPATASNVDLFSSAFATAQQQQQVQQQQLAQAQQQQAQLAANHQQQLAANAAVAQQHAQQQQQQQQQQQQQVSLPTGSGIKTAWHSGALPVMQQQGESGTNNNNSIQQPPAKRSRGEDLFLPGQQQQQQQQQQQLQNNLGGIVGGNNNVIITPQQLALAASGVGALSNRLGFTLPNNNTNIGMLAGNSVNMLAQQQQQQQGISIPTQQTNTQQQSVTTSRGITLPVGMGIKFGAGGNIIAQAQLGATNVQGGMQAVGDGVVTNGANSAMAQSVVAVSNMQYGTNPQLQLLDKGKVEDQMAAERRLRNREHAKRSRVRKKFMLESLQQQVRGLQGENSTLRMLVQKHIPTEALKII…
Thalassiosira_sp._Strain_FW_CAMPEP_0172333038	MSGQNPNIRPPQFVAAGIPGLSANAAQAVQARGTPSTLNLDDIFGDCFFTPEGEAIFLSENPQLQQQVQQQQQQQVNQQQQAQQQQPQPQQQILASGEAAPTQNASRFAGTGYTPIPQAGGITTTGLHKPTGPVTVMGNLGGGGQQQPPSQVPFAQAPQRPHHLQYAYVQAGNQAPGGGGVGGGGGGMKRAPPPSSGVGGGGKSNDRSTLVKERNREHAKRSRIRKKFLLESLQQSVSLLKEENEKLKGAIRSHLGDKEAEELLSKQALADAAAGGGLIASSSGDANKVLDDPDFSFIKALQTAQQNFVVTDPSLPDNPIVYATQGFLNLTGYTLDQVLGRNCRFLQGPETDPKAVEKIRNAIEEGSDMSVCLLNYRVDGTTFWNQFFIAALRDAGGNI…
Thalassiosira_sp._Strain_FW_CAMPEP_0172334534	MPDHAPEGGGQPPPAAAAVGGSTHPSAMQLFAADPNADPETMQQALDLDDLFHDCYFGDFAVPEDVTSNATATNASSSTKRSAEEAGFGVADPTSSSSSSKVAAASLTESQKIERRERNREHAKRSRLRKKFLLESLQEQIDGLNGEIQTLKDIIHRELPDKASALLKDMDGGDSAAGGAHKKGEFTPLPMPSGFGPVKTLMQPDYRLMSALSGSQQNFAISDPSLPDNPIVYVSQGFLDLTGYTLDQVLGRNCRFLQGPGTDQAAVDVIRKGVREGVDTSVCLLNYKADGTPFWNQFFVAALRDAENNVVNFVGVQCEVSKAVVDKHIQEGKTPDPNKGA
Thalassiosira_sp._Strain_FW_CAMPEP_0172337554	MSPAAIARPQFASNNPSNNPNANAASALESSYLAAQKQSSNHHHNDSSGDWNNMDSALDFDLLAEYLLEDGGGGTFDFMPESSSPVNVEDHDEQKHSQGVVTPTTGDVSFADPLADAAEQFKRRQQQQQQGGGGYNVANNGDMAGELSQVQNMIAVNQQQQNQAPQQPQITARAPIVMASAKEQIQALPKPPASVAAPAATMKRQPLPSAVPVQMNKRPRVDAPAGQQLVSFTGKSSVPSQANTNQSTYPRTLTAASAAAAAQQASVRGKSQSQIDRRRERNRILARRTRLRKKFFFESLQKDVADLQRENAALKSIVRSRLKPDDARAILTTCNANEKLPSIINEPEDDMGMGGGSADVKKLDKEDFNLIQSIQNSQQCFIITDPSLHDNPIVYASND…
Thalassiosira_sp._Strain_NH16_CAMPEP_0181105884	XAISHQQQLALAQAASGVGALSNRLGFTLPSNSSNGTGTVGGGVSNNAMGQQQQLQQVLQNQQITQQSANSGGINLPVGMGMKFGNGGNIMAQTLGGGGLTNGSANGVMNVAAAAGMTNRVSVTNMQYGISPLQMGMNKAHVEDQMAAERRLRNREHAKRSRVRKKFMLESLQQQVHGLQDENSTLRMLVQKHIPGEALRIIDECCSKSILFGTGEGGDGSRGEGGEGAPQDKDGDDIKETPLLRSDFSLIESLTSGQQNFVLSDPRLPDNPIVFASPGFYELTGYTREQVLGRNCRFLQGAGTDRKGIEVIRTAVANGTDATVCLLNYKADGTPFWNQLFVAALRDADDCIVNYVGVQTMIEPNAGASALEDKVNAAHPISVGVDGEEDSDGDKDKDA…
Thalassiosira_sp._Strain_NH16_CAMPEP_0181112452	MTADPIVVPEPSPLVGDAPTTTAAATTTEAAEANGTSSNANNAAHPTAMSLFAPDPNAPGESDPLDLDELFHDCYFGDFGVPDDVTSGAVPISSTAAVGVAPSIAPIPPGAPAVKRTAEMAGLTTPAVAARTPGAPKPLPAPSSGAIVAPTTASSSDLDAGGGLSTKPAASLTAAQKTERRERNREHAKRSRLRKKFLLESLQEQIEGLQGEISTLKDIIRREVPDRAAELLKGLVGDEGDAGDESDPSKPRKGDYTPLPMPSGFGPVKTLMEPDYRLMSALSGSQQNFAISDPSLPDNPIVYVSQGFLDLTGYTLDQVLGRNCRFLQGPGTDQAAVDVIRRGVREGTDTSVCLLNYKADGTPFWNQFFVAALRDAENNVVNFVGVQCEVSKAVVEKHI…
Thalassiosira_sp._Strain_NH16_CAMPEP_0181129378	MAPAALAIPQYTNSHAAHHHKISTTSAESSSEWNMESAALDFDLLAEYLLEDVGAGGFDFSNPLTDAASPPTVSILPQDPGVVTPNGSTSFVVDPLNDVAAELARAQGGLPASGDMAGELSQVQQMMGPAXPLQQRQQPQPQMRPQVQHQQPAMAAAPQRQLPPKPQPPAASIAQQRTAPMAQPPNKRPRVAPAAIPPPRAKGTSYSFAAANTSFPKSAASSSACPPFGGPPGAMMGGAGGGRQKSQAQLDRRRERNRILARRTRLRKKFFFESLQKDVADLQRENAALKSIVRSRLRPDDARALLERCDANEKLPSAIHAKEIVGMSQGMPGEMTEGGGRGAKALDREDFSLIQSIQNSQQCFIITDPSLHDNPIVYASDDFLTLTGYSQEEVLGRNC…
Thalassiosira_sp._Strain_NH16_CAMPEP_0181130906	MAPAALAIPQYTNSHAAHHHKISTTSAESSSEWNMESAALDFDLLAEYLLEDVGAGGFDFSNPLTDAASPPTVSILPQDPGVVTPNGSTSFVVDPLNDVAAELARAQGGLPASGDMAGELSQVQQMMAVTTAHQTAVGAVSAAPPPPPPPSAAAAASAPNAASGSAPAARDGRGAPATIAAEAAAPGGVDSPAAHRAMAQPPNKRPRVAPAAIPPPRAKGTSYSFAAANTSFPKSAASSSACPPFGGPPGAMMGGAGGGRQKSQAQLDRRRERNRILARRTRLRKKFFFESLQKDVADLQRENAALKSIVRSRLRPDDARALLERCDANEKLPSAIHAKEIVGMSQGMPGEMTEGGGRGAKALDREDFSLIQSIQNSQQCFIITDPSLHDNPIVYASDD…
Thalassiosira_sp._Strain_NH16_CAMPEP_0181137310	XANSNRIMSNNQNANIRPPQFVPAGVPGLSASTTTAVQTRGTPSTLNLDDIFGDCFFTPEGEAIFLSENPQLQQQVQQHQQLTQQQKQHQQLTQQQQQLQQQQLAQGSLLASGEAAPSQNASRPAAGTGYAPVPQAGGIVTTGLHKPKALATVMGNVGGTAAAAPPAVPFAQAPQRPHHLQYAYVQAGGQPPAPSGAGGSAAAGAKRGRGGPTSSGTFHNSFFEHSLHLRSKLVKERNREHAKRSRIRKKFLLESLQQSVSLLKEENEKLKGAIRSHLGDKEADALLSKQALADAAGTGGGLIASSSADANKVLDDPDFSFIKALQTAQQNFVVTDPSLPDNPIVYATQGFLNLTGYTLDQVLGRNCRFLQGPETDPKAVEKIRNAIEEGSDMSVCLLN…
Thalassiosira-oceanica-CCMP1005_CAMPEP_0192886794	MSNNNNFQMPMFAGNTQGGGGGDDIDIHDIFSDYFNDTGGEQQQQQLQQQQFHQAQANLGGGLSLPTGQGIKTAWHSGALPSMQQQQQQQQQQQQLQQPPAKRQRNDVSEAMYLPSAADQQLQLFQEQQRQYIARNQAQQASNGIVTAQQIALAQAAVGAGGLSDRLGFTLPTSHAHATSNGVQAAVQAAASGINLPVGMGLRFGAGGISQQQTLQNFGTNTSVLQAALGGGPLHVTNVQYGVNPLQQQHVVTKHLNPEESTQTERRLRNREHAKRSRVRKKFMLESLQQQVKGLQDENGTLRLLVQKHIPKHALKIIDECCSKSILFRTADGANAGKKDDKDAKETPLLRSDFSLIESLTSGQQNFVLSDPRLQDNPIVFASPGFYELTGYTREQVLG…
Thalassiosira-oceanica-CCMP1005_CAMPEP_0192911620	MSAATKALPQFSLPEERDLNHSSNMDTAALDFDLLAEYLLEDVGNGGFDFGVDLPPQSYDSVRPSMQQPTTTAPLDDHEVVTPHHSDSSYAEPLIDVSTVDYRQTAGTSLPSAGGVAASGAPAAAPSQAQTSTVMAAAQPAISAVTNQTVVPTALQQPVIAPPPRPVGTTNAGAVATVPNQLPAMRQPQQVAPTKAPVAQPPRPTAVSAPSSNQSNKRPRVSGNSQSSTMAKASAYSFAGSNTTTLATAAMAAQINKAHPMPPAPPTDSRSGEKSQAQVDRRRERNRILARRTRLRKKFFFESLQKDVADLQRENAALKSIVRSRLKPGDARSVLDQCDAHKKMPGDVRSSQFKENDGTNLTGAAPDGGSSVKKLDREDFSLIQSIQNSQQCFIISDPS…
Thalassiosira-oceanica-CCMP1005_CAMPEP_0192912648	MSGSENKDHMPDPTPVSATQEAPAENNNTSAMQLFAPDPNAPGESAALDLDELFHDCYFGDFPMPEEVTSSTAPAEPVVSKPAAAEPAKSEPTAPKPVAPKRSADQAGLDASSGRRPSRNSARKPAPSTERGLSTRPAASLTESQKTERRERNREHAKRSRLRKKFLLESLQEQIDGLQGEISTLKSIIKRELPDRAAALLKDIGDSDEADSAAPNKGSFTPLPMPSGFGPVKTLMEPDYRLMSALSGSQQNFAISDPSLPDNPIVYVSQGFLDLTGYSLDQVLGRNCRFLQGPGTDQAAVDVIRRGVMEGTDTSVCLLNYKADGTPFWNQFFVAALRDAENNVVNFVGVQCEVSKAVVEKHISEGKTPPLKS
Thalassiosira-rotula-CCMP3096_CAMPEP_0192954042	MAENQNQPQDAIRPPQFIAAGVPGLSASTSVAVQTRGTPSTLNLDDIFGDCFFTPEGEAIFLSENPQLQQQVQQQQQLNQQQQQQQQQQQQVQQQQQELSQGALLASGEAAPSQNASRPTGTGFAPVPQAGGIVTTGLHKPKAAVTVMGNASGNAAPPAVPFAQAPQRPHHLQYAYVKAGGTGAQAPASGRVGGSTSTGNAAKRARGGGASSGAAKPEGGSKADRSKLVKERNREHAKRSRIRKKFLLESLQQSVSLLKEENEKLKSAIRSHLGDKEADSLLSKQALADAAGAGGGLIASNSSDANKVLDDPDFSFIKALQTAQQNFVVTDPSLPDNPIVYATQGFLNLTGYTLDQVLGRNCRFLQGPETDPNAVEKIRNAIEEGSDMSVCLLNYRVDG…
Thalassiosira-rotula-CCMP3096_CAMPEP_0192960514	MAPAAVLVTIPQYAATNNKLTSNETHLRESSEWNNMGDSALDFDLLAEYLLEDMGAGGFDFGASAEAVSPPIIDTLKTQPTSVLPDPGIVTPNPNQDGPAFIDPLTDVTTQLQQPLPTGGDLAGELSQVQQMIAATQQQQQQQQQQATDAGIVAAPQPPLAQPPAQPQTQMAVTPMMTQQQQPVEPVMMGMRHASPQQQPKLAPAAPIMAAAPVSVATAPITQQQRAPPMVPKVPPMTQPPNKRPRVSAASFASVNRTNALRVSAGPGGAPLPLSPPQNGIPGVGGRQNKSQAQIDRRRERNRILARRTRLRKKFFFESLQKDVADLQRENAALKSIVRSRLKPDDARALLSRCNANERLPSAIQHDADGVPIGAVGGIDGAGVNKLDKEDFSLIQSIQ…
Thalassiosira-rotula-GSO102_CAMPEP_0193020588	MSADLAAVPDPTPVGGPPQSVAAAPAAAAAANGTTNNSGNTSAMQLFAPDPNAVSEGEPLDLDELFHDCYFGDFPLPEDVTSGPAMAAITTPAGVVMAAIAPIIAPAPAIKRTAEQAGLTTPASAQPAAQRPAPTTTSSSSSALLTTAAPPQPQPGVAPSSTPAVSAPIKLEPTPVPSSIHYTSGGSGSANGGTTTPAGGGPLGAISTKPAASLTESQKIERRERNREHAKRSRLRKKFLLESLQEQIEGLQGEIHTLKDIIKRELPDRATDLLKDIGDHEYEGNEDDPSQPKKGSYTPLPMPSGFGPVKTLMEPDYRLMSALSGSQQNFAISDPSLPDNPIVYVSQGFLDLTGYTLDQVLGRNCRFLQGPGTDQAAVDVIRKGVREGTDTSVCLLNYK…
Thalassiosira-weissflogii-CCMP1010_CAMPEP_0193033050	MDNALDFDLLAEYLLEDGGMGGLDFIPDAASPAAASPSEQNNPGVVTPHQADVSFADPLADAAEQFRLKHGGHVLPNSGDLSGELSQVQHLIAAQSNNNNINHGQARTHPLATQQIMAVGAPRPAPMPVMAQQQPAPSPMMQSPTIQNQNNFALQPNKRQRTNGAPAALVSFAPSNGGAPRPTANGSYPPPGIAPAPSSQPGPRQKSQAQIDRRRERNRILARRTRLRKKFFFESLQKDVADLQRENAALKSIVRSRLKPDDAKAILSTCNANDKLPSIDYDPLDEGGVNFGGGADGDVKQLDKEDFSLIQSIQNSQQCFVITDPSLHDNPIVYASDDFLNLTGYSQEEVLGRNCRFLQGTGTCQKKVAAIRDAVTAGEDINVTLANYTSNGTPFWNSL…
Thalassiosira-weissflogii-CCMP1010_CAMPEP_0193033574	MSAAPPPNGNAFHPNPPQAADMAPVPQPAAANQAPGNAAHPSAMTLFAPGPSEGENQQGLDLDELFHDCYFGEFPVPDDITSGPADISLPLKRNADEAGLRSTQAPAAPISAAPMTSTPAPQAAPVPIPSAESSSKSVTAMSISESQKIERRERNREHAKRSRLRKKFLLESLQEQIDGLQSEIQTLKSIIRRELPDKANDLLKDLDEDEINDVSHPKRGEFTPLPMPSGFGPVKTLMEPDYRLMSALSGSQQNFAISDPSLPDNPIVYVSQGFLDLTGYTLDQVLGRNCRFLQGPGTDQAAVDVIRRGVREGVDTSVCLLNYKADGTPFWNQFFVAALRDAENNVVNFVGVQCEVSKAVVDKHIKEGKTPAPTNSS
Thalassiosira-weissflogii-CCMP1010_CAMPEP_0193054500	MSGNQQQPNPNIRPPQFVQAGFPGLSASASAAVQARGTPATLNLDDIFGDCYFTPEGETIFLSENPQLQQQVLQQQQQQKQQFNQQQQQAGILTSGESAPTQNASRQTNTGFQPVAQAGGIVTTGLHEPRAPATVMGNTNSGPVPSQVPFAQAPQRPHHLQYAFVQAGNQAPNAEPAKGGSGNGAVGSAKRGRGASSAGGAGNGGAKGETTKADXEQTCEEVIFVTSWDVEXLHDAENLIALIFIATQDSISDAIISTPPLQQLAHNLRERNREHAKRSRIRKKFLLESLQQSVSLLKEENEKLKGAIRTHLGDKEADSLLSKQALADAASVGGGLIASGSSDANKVLDDPDFSFIKALQTAQQNFVVTDPSLPDNPIVYATQGFLNLTGYTLDQVLGR…
Thalassiothrix_antarctica_Strain_L6-D1_CAMPEP_0200946908	MSAAPLFAPTEPGLSTEAAVAVAQRGTPATLNLDDIFGDVLFTPEGDTVFMNEIQGESGEVIQSGEGDKVSEVASRIIGEGQVVPIPKAGGVQTTQLNQPGKPALVMASSLAHGVVPTGVPYKHAPQQRHHLQYATPEMMNAVKKRKAGSKSSDRKMSAQQKVERRERNREHAKRSRIRKKFLLESLQQSVTLLKDENEKLRSAIQGHLGEAEADELINKKIGSDEAGLIANSSLDANKVLDDPDFSFIKALQTAQQNFVVTDPSLPDNPIVYATQGFLNLTGYTLDQVLGRNCRFLQGPETDPKAVEKIRRSIEEGSDMSVCLLNYRVDGTTFWNQFFIAALRDASGNITNYVGVQCKVSDQYAANVCKRQEEEDEFSLTE
Thalassiothrix_antarctica_Strain_L6-D1_CAMPEP_0200947520	XNYSGAAAAVALAQKQQQVNQQQQQNYQQQNQQLTAGMVATPIASTPAAAAAAVATHAGALASAVALIPAPQLVPIPAPQVVPIPATQIAPTQAPRNALSLVAAAPILPTGGIKTMFHNSTAMVPSVATRALQQQFQRHQQQVAQPNNVTSSAGPPSAAVSVVGGITMAGSNGIMEPAIKKIKTAGGLSGRLGFSMVGGQLALPQHHLQKQQQLQQGVSITASSITQQSQMATMASTKQQTTATPGDMVLPVGVGIRLGGIGGVAPATAAHRVGQYSMWSGGAGGGLGGPGGSGGPMSEQAIAERRQRNREHAKRSRVRKKFMLESLQEQVRGLQRENVELRMIIQEKIPEKAQKIISNCCCKNSLFSDPTNDPPPSGDVTTEDGGESVTKDPTALARS…
Thalassiothrix_antarctica_Strain_L6-D1_CAMPEP_0200958318	MTTISTMLPVTLPRFAPPVPPQDTAPQTSSQAAVWAATNGDNQNGEPLDFDILAEYLLDDSAAVGSNTTTGIPQFDYSETTTGSGVVSPEQSEDGLSLMIEAALPVAPPTTVTAPSVLLTNRANAHVQMPQRQPILAPSTETAPPQTGMPMAPAAPAVSTFPAQPAAIPPVAPFQGTSMIVNHHAPPSLTVTIPGNKRRRVDGATQVVAGSQILSNGHFAANNTMTGRGRQKSQAQIDRRRERNRILARRTRLRKKFFFESLQKDVIDLQRENAILKELASKKLPLETSKKLLAECKATEKLPSAVQEAVGESVADMNSQDFNLVHSIQRSQQCFVITDPSLQDNPIVYASDDFLTLTGYQRGEVLGRNCRFLQGTETSPRKVERIRKAVSLGEDTTVT…
Thalassiothrix_antarctica_Strain_L6-D1_CAMPEP_0200964852	MTSNGVPPPTELAPVPMFAPSDPKVAGATSGAVDLDDLFRDCYFGDFPIAPFSNEIIGVPAVPPGALQSTPSMPIAPIGTAPIGTVALSGQLAPVMVAAPAAPVHSGPQLSVKRTAEEAALTDSYAQITSATHNVKQLTDQQKVERRERNREHAKRSRLRKKFLLESLQEQIHGLQAEIETMKDVIRKEIPDKAEKILKELSGDKDKFTPLPMPSGFGPVKTLMEPDFRLMSALSGSQQNFAISDPSLPDNPIVYVSQGFLDLTGYKLDQVLGRNCRFLQGPGTDQSAVEVIRRGIREGVDTSVCLLNYKADGTPFWNQFFVAALRDAENNVVNFVGVQCEVSKAVVEKQIAEGKMPPDAK
Triceratium_dubium_Strain_CCMP147_CAMPEP_0197446746	MAAVSNMMPVSLPRFAPASTAASNAVQKQSDAGMPSHALVENGSGDILDFDMLAEYLLEDGSGATGLPAFDFSSETPPSSDQQQQAGVVSPDQATQFVDPLADAVAEMKKAGGAAAVPVPNVHVASTSQQAATVPIPAPAVAPVAAPVTAPAATPTSVPAAALAGASATALGGAQLTTPAVAPASASATAPAAAPSTAPANAPIPAFQQNSTSFAPAPVGTAVTASPVVHAVAPPPAAPIAAPPTLAPAPIRVPLANSLPQQPVLRSSLPDLNGSPHKRRRIDAAAPLVAAATAAPVGPLMTMNGQILPQAFPQRGGRQKSQAQIDRRRERNRILARRTRLRKKFFFESLQKDVTDLQQENVALKEIVRTRLNPDVAKSLLEDCNAIEELPTVVLEQCG…
Triceratium_dubium_Strain_CCMP147_CAMPEP_0197460092	PPPPTTAPATVPVYASSGGISVASSSGVTPPSARPAPHPVLSEPSLSQRDSKSGDGNGPAAKELTEQQKVERRERNREHAKRSRLRKKFLLESLQEQIHGLQGEIEQLKDIIKTELPDRADELLKKVEGASGAGGGQGDQQYTPVPTPSGFGPVKTLMEPDYRLMSALSGSQQNFAISDPSLPDNPIVYVSQGFLELTGYTLDQVLGRNCRFLQGPGTDQAAVEVIRRGIREGVDTSVCLLNYKADGSPFWNQFFVAALRDAENNVVNFVGVQCEVSKAVVDKQIQEGKLPSSAMASASKSGA
Triceratium_dubium_Strain_CCMP147_CAMPEP_0197468714	XGQGVMEDEETMSVWARQQKANLMSEQALQDKTTSVAGVNSSVSEASSFKGALDAHLQTNRHSRPLNLDEATFVSAAEYMGSNDTKQGQEQATASSATNYDEMSCFYSVRDGHSVSGMTQRTQSVRQSDHNAAPGERMDAAVDAAFTYKGDLESTREPQDGDDGTSASGSWMPAGATGGLLNNNKDDVTSASGSWMPAGATGGLLNGQDDDVTSASGSWMPAGATGNLLNGEDGEESLASYSTWDTKSLRSMVLRAGNHDSDDMSAVSGLTDVYSVQGGHTVCDDAEDHDTNSEVMWELYRIKGLLGSVLEETAAIENGDEDEKKEEPQPAPAPLVPAVPTPPPVVAQPHPSLRQPDFKFISALSGNQQNFAISDPTQPDNPIVYVSQGFLDLTGYALN…

## Sheet: Sheet4
DPH sequences identified in the Tara Oceans data (MATOU-v2)				Taxonomic annotation fom Tara
ProteinID	GeneID	Sequence	Group	phylum	class	order
MATOU-v2.109517714_3	109517714	FQFPGVSGLDVLLSRKAIVELVEWGGDPLKTIKSDGTLSPRSSFASFMKGHLKKGKPWDDADKIRVKRFIERLEKYRSSEVFEKQHNTIVNLGQERSDLIKDQKEN	Centric	Bacillariophyta	Coscinodiscophyceae	Thalassiosirales
MATOU-v2.119145727_4	119145727	LHSDFSRIRQVVHNLISNAIKFSENDIAIEVLERGSFRDVLSVWGTYMNSYPSCEPSLKDLAAFSAEETANGSQENTLWLIISVIDKGIG*SSVSLTRASVSAPPI*RGSA*LSLSFRKAGKRNTKAPALESTSAR*SLPLSGASWSFSVPRITAA	Centric	Bacillariophyta	Mediophyceae	Cymatosirales
MATOU-v2.119145727_5	119145727	SL*FQPNTAGRS*PDIERD*VFRERYCH*GPGARLVQRCVERLGNVHEQLSILRAEFEGPCGIQCGGDGEWEPGKYVVVDHQCH*QGHRLIISVIDKGIGIGAADLKRLGIAFTQLSQGRQKKYQGTGLGINICQMIITALRGKLVIFSAKDYGSX	Centric	Bacillariophyta	Mediophyceae	Cymatosirales
MATOU-v2.119696145_4	119696145	KMPKSSKSEKKARMAALQAEYESLGIAARNPKLLVVDDSSINRKLCTRKIKTWLPGVAITECSSGKGLIEEYEHDHSIIMGIFLDFHMPGMEGDAAARRIREYEETHEEARRVYIAGYTADVLEDSTQKLLSAGMDSVIPKPEPTDAFECELRNMMRRFASDCGGGSQ*RDNYR*LVVLCFGILRFSLFLLGIPISK	Centric	Bacillariophyta	Mediophyceae	Cymatosirales
MATOU-v2.120252142_4	120252142	LNTLAFFHLQGIDVLLSRQATVEQVQWGGDPDKKLESDGTLSPRNSFAAYVKGHLKKGKPWDESDKTIINRLVDQIEKYRSNEIFAEQSEAIQTLEAEKKQAMDENTTSYAFFAHMAHELRTPFHGILGSLEAMREDPLLAN	Centric	Bacillariophyta	Mediophyceae	Cymatosirales
MATOU-v2.120836633_4	120836633	HHTDGTKKVRSYDVDGHTPVDGEGRATVGGAILSNDVFDCLTDTYGQICRDYGTVFIDEQKSHSILVSAGLNTLAFFHLQG	Centric	Bacillariophyta	Mediophyceae	Cymatosirales
MATOU-v2.123636151_1	123636151	RGARLA*LSRGRP*ATMEERHRRGVRSKRTSHDSAAETAILDSRVRENAPSTSTSPSPRCMRLATREQQKDSIADARSLAFTSLEDCDRSTFREYIDGKRPMAPPPVKTVERLPKRAKWESSQTETSGEESSKEDCSTNEQTRHKGKERIEVMDDALTRSGLIVLHGAPSEAIKRVVRSNLLQRARSPSSSEEEVCPGSNHGRQSRRSGRSSHASVSAFLRGPSRASLGSVGGSMGDLTRLAVPVSVSRTLSSSLSLGVSARETPPAAPDALESYEQMMRCPAPRRAQRLTTSKPSSSYHATLSMCSPSPGAWWSLG*CTLTHARA*T*FMRHKA*AWNEEQWARRVVCAFSSMVQFRQCDFDGCPRYKSCVRRAI*F*RRIWPLAEPQRVE*VGYVGI…	Centric
MATOU-v2.126027440_1	126027440	NMNVTSTLVIAIIVNKRLWGLYAFHGYRHPIRPTARTRFLCEMASVMTSMVMESLTRTNDAARLMDIDQTLCNLQDMTIIDYMGNPFYRKQIMELLDVNLIAFRKTEENGNVHIHTYSDKGDSKDKDQPEISSTVFDCLCDSYGQVCKDYGVVFIDETNNPALGPLHTLAFFQFPGVVNSLDVVLSRKAMVELVEWGGDPEKTLESDGTLSPRSSFSSFLKGHLKKGKPWDDAHRQQVRRFGEKLEKYRTTEVFQKQNEAIQTLGQEHKELIADQKGNLDFFAFMAHELRTPFHGVLGS	Centric	Bacillariophyta	Coscinodiscophyceae	Thalassiosirales
MATOU-v2.126063584_3	126063584	DAMVFMQSIAHDLRKCWSIEEMAGLVCSRIMSETPFDRGMVYRFDPSDGSGEVVYETTRWDARRCCRDDSFLGLRFPA	Centric	Bacillariophyta	Coscinodiscophyceae	Thalassiosirales
MATOU-v2.128161175_4	128161175	GKIFASQITPLSCEREPIHIVNRIQPCGTLLVIDSDLVIVQCSTNAIDLLPEDYELEETTDDLAVLSLNKVGENELDPRLLVSKLP	Centric	Bacillariophyta	Coscinodiscophyceae	Thalassiosirales
MATOU-v2.128222535_2	128222535	DDLAVLSLNKVGENELDPRLLVSKLPQVEEDDNAADRNKRLSLLNAIIGSPLSLVLQSKAVDQVRSVVRGAT	Centric	Bacillariophyta	Coscinodiscophyceae	Thalassiosirales
MATOU-v2.128644747_4	128644747	VHNLISNAIKFSEDDIYVELHERRTFSEVLTVWKTYTASYASHEPQLKDITRADTSGNGAENDDDNLWIIISVID	Centric	Bacillariophyta	Coscinodiscophyceae	Thalassiosirales
MATOU-v2.128656979_1	128656979	QVCKDYGVVFVNETTSNPALGSLHTLAFFQFPGVSGLDVLLSRKAIVELVEWGGDPLKTIKSDGTLSPRSSFASFMKX	Centric	Bacillariophyta	Coscinodiscophyceae	Thalassiosirales
MATOU-v2.128856209_5	128856209	PKYTDLSMCRLRGSSYIHLEYLKNMQVTSTLVIAIIVNKRLWGLYSFHGYRQPIRPSAKTRFLCDMSSVMTSMGLLRAPTIKAAFLTLTRL*AT*KILAFLT**TIPRTVNDYLRHWTLVSFHFVKSMTMATLTFTTTRTMVNLAKYLPRYLPRRFKACKTRMVKSARTTVWCL*MRLHRIQR*DLCIPLRSSSSQVSPALTCFSVEKP*LNWWNGX	Centric	Bacillariophyta	Coscinodiscophyceae	Thalassiosirales
MATOU-v2.128856209_6	128856209	EVHGSEHVSFERIVLYSSGVSEKHASYVHACHCDHCE*ASVGSVLLPWLSSTHSSISQNSLLMRHV*CDDVYGSLTRTNDQSRLLDIDETLSNLKDLSLFDLMNNPTHSKRLFETLDVGLISFRKIDDDGNSHIYNYSDDGKLGEVSPEVSPEAFQSLQDTYGQVCKDYGVVFVNETTSNPALGSLHTLAFFQFPGVSGLDVLLSRKAIVELVEWG	Centric	Bacillariophyta	Coscinodiscophyceae	Thalassiosirales
MATOU-v2.129570224_5	129570224	TEVMTVWKTYTNSYPNHQPRLKDISPPKSSVGDDDDNFWIILSVIDKGIGIKSDDLAKLGTAFTQLSQGRQKKYQGTGLGITISNMIIDALHGQLVVFSAPEYGSCFTFAIPVKCTKELTEEKKTLNSQDAQKLRIKQLRAEFESFALKKSPRVLVVDDATINRKICSRKVKKLLPSVEITECANGKSCIEEYEHDHANIMGIFLDYHMPGMDGDEVARKIREFEKLNEKVKQAVWIVGYTADVLEDTKKVLLDAGMNSVMPKPEPMHAVEEALRIMGQRAKKE*NMYRRX	Centric	Bacillariophyta	Coscinodiscophyceae	Thalassiosirales
MATOU-v2.133716172_4	133716172	IGIKAEDLTRLGTAFTQLSQGKQKKFQGTGLGITISNMIISALKGQLVVFSAPEYGRSASCVQCPRIW*LFYIRNPCQTRWQTNS*TQKPKQ*GSDKTSY*KASCRV*ELWFC*RWWWQATTSSCCGRFHHQQKNMLSEGEEASSSC*NY*VYQWCTLPRRIQARPQEHYGHFPGFSHAWNGWRCSGA*DT*V*AAT*GCEARGMDCWVYCRHSGGNKEYAT*SRNEQGNAKAGTDACF*GGATNNDQEGG*GGSIMLLRIRKVK	Centric	Bacillariophyta	Coscinodiscophyceae	Thalassiosirales
MATOU-v2.133716172_6	133716172	VLVSKRKI*LDLGQPSLSFHKANRRNFRAQGLASLFPT*LYLP*KVS*LCSVPPNMVGQLVVFSAPEYGSCFTFAIPVKRGGKQTPEHKNPNSKEATKLRIEKLRAEFESFGFANGGGGKPPRVLVVDDSTINRKICSRKAKKLLPAVEITECISGVRCLEEYKHDHKNIMGIFLDFHMPGMDGDVAARKIREFEQLHEDVKQEVWIVGYTADILEETKNMLLEAGMNRVMPKPEPMHAFEEELRTMIRRVAREEV*CFLGYVKLX	Centric	Bacillariophyta	Coscinodiscophyceae	Thalassiosirales
MATOU-v2.133846310_6	133846310	RGSSHMHLEYLRNMNVTSTLVIAIIVNKRLWGLYAFHGYRHPIRPTARTRFLCEMASVMTSMVMESLTRTNDAARLMDLDQTLCNLQDMNIIDYMGNPFYRKQIMELLDVNLIAFRKTEENGNVHIHTYSDKGDSKDQVDISPAVFDCLCDSYGQVCKDYGVVFIDETNNPALDSLHTLAFFQFRCDVNSLDVVLSRNAMVELVEWGGNPEKTLESDGTLSPRSSFSSFLKGHLKKGKPWDDAHRQQVRRFGEKLEKYRTTEVFQKQNEAIQTLGQEHKELIADQKGNLDFFAFMAHELRTPFHGVLGSLEAMKEDPTIANNQLLNQAYMCGKNMIRILDDILLVAKGSYSLNITEQSVDLSEFLQQTVTDMQNFAYMEGVSVRVRKEDIINKRAASDF…	Centric	Bacillariophyta	Coscinodiscophyceae	Thalassiosirales
MATOU-v2.133873049_2	133873049	CWSIEEMAGLVCSRIMSETPFDRGMVYRFDPSDGSGEVVYETTRWDARRCCRDDSFLGLRFPATDIPRQTRELFMKNTLRFVYDVLGKDHPLYPSRIEGEMGEAKKYTDLSMCRLRGSSHIHLEYLRNMX	Centric	Bacillariophyta	Coscinodiscophyceae	Thalassiosirales
MATOU-v2.133908359_4	133908359	VRTFLIRTRRLVSTGRKSCSITQSGQHFLIEIEDMDEDPKPNLSSVSTANDGANDIEGDQVNEGDAEGEGDAMVFMQSIAHDLRKCWSIEEMAGLVCSRIMSETPFDRGMVYRFDPSDGSGEVVYETTRWDARRCCRDDSFLGLRFPATDIPRQTRELFMKNTLRFVYNVLGKDHALYPSRIE	Centric	Bacillariophyta	Coscinodiscophyceae	Thalassiosirales
MATOU-v2.133931791_4	133931791	STNAIDLLPEDYELEETANDLAALSLNKVGENELDPRLLVSKLPQVEDDNAADRNKRLSLLNAIIGSPLSLVLQSKAVDQV	Centric	Bacillariophyta	Coscinodiscophyceae	Thalassiosirales
MATOU-v2.134586812_1	134586812	VSPAAFQCLCDTYGQVCRDYGVVFVDETKTNPALGSLHTLAFFQFPGVTSLDVLLSRKAMVEVVEWGGX	Centric	Bacillariophyta	Coscinodiscophyceae	Thalassiosirales
MATOU-v2.134608929_5	134608929	EQDTMVFMQSIAHELRKCWSIEEMAGLVCSRIMSETPYDRGMVYRFDPCDDSGEVIYETTRWDARRCCREDSFLGLRFPASDIPRQARELFMKNTLRFVYDVQGKDHALYPSKMNTFDGEEPKYTDLSMCRLRGSSYIHLEYLKNMQVTSTLAIAIIVNKRLWGLYSFHGYRQPIRPSAKTRFLCDMSSVMTSMVMESLTRTNDQSRLLAIDETLSNLKDLSLFDLMNNPTHSKQLFETLDVGLISFRKIDNEGNSHIYNYSEDGQLVEVSPEAFQSLQDTYGQVCKDYGVVFVNETTSNPALGSLHTLAFFQFPGSGLDVLLSRKAIVELVEWGGDPLKTIQSDGTLSPRSSFTSFIKGHLKKGKPWDDADKIRVKRFVERLEKYRSSEVFEKQHNTI…	Centric	Bacillariophyta	Coscinodiscophyceae	Thalassiosirales
MATOU-v2.134631589_4	134631589	EGVSVRVRKEDVFHQRATSDFNRIRQVVHNLISNAIKFSEEDIYIELLQRRTFSEVLTVWKTYTASYPNHEPRLNNIAPANASTNSVSDGDDNLWI	Centric	Bacillariophyta	Coscinodiscophyceae	Thalassiosirales
MATOU-v2.134704281_1	134704281	LLLQPDAVDKVISVIRGAVSAKSGSGSNEDPSKVGGSTNTGAVRTFLVRTQGALSLGRKTCGVTQSGEHFLLEIEDQEPSEAEDGSSADAEGEQDTMVFMQSI	Centric	Bacillariophyta	Coscinodiscophyceae	Thalassiosirales
MATOU-v2.134717672_4	134717672	STLDGADYAPQVTPLSCERELIHIVNRIQPCGTLLVVDVELKIVQCSTNALELLPEEYELETLSKKLSLDNKDTDESKRQVHLLNAV	Centric	Bacillariophyta	Coscinodiscophyceae	Thalassiosirales
MATOU-v2.134771264_1	134771264	MDGDEVARKIREFEKLNEKVKQAVWIVGYTADVLEDTKKVLLDAGMNSVMPKPEPMHAVEEALRIMGQRDRQCGLLVILQMFLKIQKRFYWTLG*IVSCPSQNQCMPSRRRCGSWGNGQRKNX	Centric	Bacillariophyta	Coscinodiscophyceae	Thalassiosirales
MATOU-v2.134771264_3	134771264	GRR*SGKEDS*V*EVKRESEAGSVDCWLYCRCS*RYEKGSIGRWDE*CHA*AGTNACRRGGVADHGATGQAVWIVGYTADVLEDTKKVLLDAGMNSVMPKPEPMHAVEEALRIMGQRAKKEX	Centric	Bacillariophyta	Coscinodiscophyceae	Thalassiosirales
MATOU-v2.134932579_2	134932579	QIMELLDVNLIAFRKTEENGNVHIHTYSDKGDSKDKDQPEISSTVFDCLCDSYGQVCKDYGVVFIDETNNPALGPLHTLAFFQFPGVVNSLDVVLSRKAMVELVEWGGDPEKTLESDGTLSPRSSFSSFLKGHLKKGKPWDDAHRQQVRRFGEKLEKYRTTEVFQKQNEAIQTLGQEHKELIADQKGNLDFFAFMAHELRTPFHGVLGSLEAMKEDPTIANNQLLNQAYMCGKNMIRILDDILLVAKGSYSLNITEQSVDLSEFLQQTVTDMQNFAYMEGVSVRVRKEDIINKRAASDFNRIRQVVHNLVSNAIKFSDEDISIELLQRRTFTEVMTVWKTYTNSYPNHQPRLKDISPPKSSVGDDDDNFWIILSVIDKGIGIKSDDLAKLGTAFTQLSQ…	Centric	Bacillariophyta	Coscinodiscophyceae	Thalassiosirales
MATOU-v2.134970949_2	134970949	LDPRLLVSKLPQVEDDNAADRNKRLSLLNAIIGSPLSLVLQSKAVDQVRSVVRGATSSAKAKVDTKEEQACGANTNTGAVRTFLIRTRRLVSTGRKSCSITQSGQHFLIEIEDMDEDVIPNPDL	Centric	Bacillariophyta	Coscinodiscophyceae	Thalassiosirales
MATOU-v2.136251660_6	136251660	GTKKSPRVLVVDDSTINRKICSRKIQKLLPAVEITECASGKSCIEEYFHDHSNIMGIFLDFHMPGMDGDVVARKIREFEKLHEDVKQDVWIVGYTADILDTTKNILLDAGMNHVLPKPEPMHSFEAELRTMIRRAANEDVRRS*CSDNAATHV*LKX	Centric	Bacillariophyta	Coscinodiscophyceae	Thalassiosirales
MATOU-v2.136320462_4	136320462	WIVGYTADILDSTRNILLEAGMNQVMPKPEPMHAFEAELRTMIRRAANEEDVRDS*HFTQDETSSGRGDEPHHAKAGANALVRGGIVDHDPEGGE*RRCT*FMIC*ECENARLTSSIGSNGIELLCIP*VFIHLE*NTRSHHAKSWSLARV*GGIDDHFP*GGE*RRCTRFMIF*ECENARLTSIIGSNRIEFLCISLVFYLYGL*NPKGQTVVGRQQHGVS*HIFLNYNVTCYNV	Centric	Bacillariophyta	Coscinodiscophyceae	Thalassiosirales
MATOU-v2.136320463_5	136320463	WIVGYTADILDSTRNILLEAGMNQVMPKPEPMHAFEAELRTMIRRAANEEDVRDS*HFTQDETSSGRGDEPHHAKAGANALVRGGIVDHDPEGGE*RRCIYSPGMKYPITSCQELEPCARLRRN**PFSVGRRMKKMYAIHDILRMRKRTTDFNYWL*PNRVFVYFIGILFVWTVKPERSNGRRKATTWCIVTHLFKLQCYLLQCX	Centric	Bacillariophyta	Coscinodiscophyceae	Thalassiosirales
MATOU-v2.136420244_5	136420244	AFQCLRDMYGQVCRDYGCVFVDETKTNTLLGNLHTLAFFQFPGLELDVLLSRKSIVEKVQWGGX	Centric	Bacillariophyta	Coscinodiscophyceae	Thalassiosirales
MATOU-v2.136445385_4	136445385	LPKPEPMHAFEAELRTMTRRAANEDVSQIMMF**CCYPCSYD*K*WLKHNLDRVDMF*RVVYC	Centric
MATOU-v2.140211192_4	140211192	*RAPIRV*KL*S*EDSTSSGSGRCHYQQKDLLPKDQEIVAFH*DHRVCQR*GMYRGV*T*SCEYHGNLFRFPHAWNGWR*SSKKDPRV*ETT*RC*AGSMDCWVYCGYSRGYIREFEKLHEDVKQEVWIVGYTADILEDTKKVLLDAGMNSVMPKPEPMHAFEEALRIMARRAGNEE*EERIPMYS*EGEPSTLRMLSYHHG	Centric	Bacillariophyta	Coscinodiscophyceae	Thalassiosirales
MATOU-v2.140211192_6	140211192	IEELRSEFESFNLKKTPRVLVVDDATINRKICSRKIKKLLPSIEITECASGKACIEEYEHDHANIMGIFLDFHMPGMDGDEVARKIREFEKLHEDVKQEVWIVGYTADILEDTSESLRNYMKMSNRKYGLSVILPIFSRIQRRFYWMLG*IV*CLSQNRCMLSKRHFESWHAEQGMKSRRRGYQCIVRKESHLH*GCSHIIMG	Centric	Bacillariophyta	Coscinodiscophyceae	Thalassiosirales
MATOU-v2.140219170_4	140219170	EKEDDETKGEGDAKGEGDAMIFMQSIAHDLRKCWSIEEMAGLVCSRIMSETPYDRGMVYRFDPSDGSGEVVYETTRWDARSCCRDDSFLGLRFPAGDIPRQARELFMKNTLRFVYDVQGKDHSLYPSKIEGSGLETTKYTDLSMCRLRGSSHIHLEYLRNMNVTSTLVIAIIVNKKLWGLYSFHGYRHPIRPSARTRFLCEMASVMTSMVMESLERTNDAARLMDIDQTLCNLQELSIIDYMGKSAYRKQIMELLGVNLIAFRKTDENGDVQIHTYCDTSKDT	Centric	Bacillariophyta	Coscinodiscophyceae	Thalassiosirales
MATOU-v2.140321882_3	140321882	SFHGYRHPIRPSARTRFLCEMASVMTSMVMESLTRANNQSRLMDIEQTLSNLQQVNLTHFMSDPNHRKLLMERMX	Centric	Bacillariophyta	Coscinodiscophyceae	Thalassiosirales
MATOU-v2.140591996_4	140591996	HEPRLNNIAPANASTNSVSDGDDNLWIILSVIDKGIGIKADDLKKLGTAFTQLSQGRQKKYQGTGLGITISNMIINALKGQLIVFSAPEYGSCFTFAIPVKRGKDPTVEKKNLNSKEATKLRIEQLRAEFESFGFAQGGTKKSPRVLVVDDSTINRKICTRKVKKILPAVEITQCANGKSAIEEYEHDHANIMGIFLDFHMPGMDGDVVARKIREFEKLHEFVKQEVWIVGYTADILDTTRNILLEAGMNDVMPKPEPMHAFEEALQIMIRRAANEEDIPNP*YFWQQHIFNLV*ISVRS*YFLKASYFCL*VGSANLLKRLVPLIPCCPYLTIREEEIDGKYATICQMMNCNAESILEFRKVRGNN*EYI*MTSSTYLSSVWCEHPK*INMKPILV	Centric	Bacillariophyta	Coscinodiscophyceae	Thalassiosirales
MATOU-v2.140799693_1	140799693	ARKSPRVLVVDDSTINRKICSRKVKKLLPAVEITECASGKSCIEEYQHDYKNIMGIFLDFHMPGMDGDVVARX	Centric	Bacillariophyta	Coscinodiscophyceae	Thalassiosirales
MATOU-v2.142182496_6	142182496	QEYEHDYQNIMGIFLDFHMPGMDGDVVARNIREFEQTHEDVDVGQGGVWIVGYTADILDETKNVLLDAGMNRVLPKPEPX	Centric	Bacillariophyta	Coscinodiscophyceae	Thalassiosirales
MATOU-v2.144559292_6	144559292	EFEQLHEDVKQEVWIVGYTADILEETKNMLLEAGMNRVMPKPEPMHAFEEELRTMIRRVAKEEV*CFLGYVKLREYAVAKEEECDGLASGRGG*MKWIMVNF*KCRSTDKSSHQAYTLRVFNNDNVY*LPCSR	Centric	Bacillariophyta	Coscinodiscophyceae	Thalassiosirales
MATOU-v2.144900170_2	144900170	DFFAFMAHELRTPFHGVLGSLEAMKEDPTIANNQLLNQAYMCGKNMIRILDDILLVAKGSYSLNITEQSVDLSQFLQETVTDMQNFAYMEGVSVRIRKEDIIHKKAASDFNRIRQVIHNLVSNAIKFSEEDINIELLQRKSFSEVLTVWKTYTSSYPNHEPRIKDISPPNNLSGGSDEEESWIILS	Centric	Bacillariophyta	Coscinodiscophyceae	Thalassiosirales
MATOU-v2.145911980_4	145911980	TLRFVYDVQGKDHSLYPSKIEGSGLETTKYTDLSMCRLRGSSHIHLERNLHSCYCHHRQQETLGSILFSWI*TPYSTICTY*ILM*DGICHDINGYGKFRTYERCGTSHGY*SDSLQPPRT*YY*LHG*ISLP*ADHGTPGCESNCLS*NG*EWRCSDKQPCT*STTYACFLPVKSWCCEFFRCVAQSKGDDRTR*MGRRS*ENTRIGWHFIAAI*LY*LCERSSEERKALG*RRPRTSKAIW*KA*KVSIYRGLSETE*GNSELGSRA*GVDC*SEG*SGLLCVHGS*IEDSIPRSARFSRGNEGRPDYSEQPIVESSLHVWQEYDTNFG*YPSCSKG*L*SQHYRAKC*LVTVFTGDCHRYAKLCLHGRRFSSNP*RGYHSQESGV*FQPNTTSDSQ…	Centric	Bacillariophyta	Coscinodiscophyceae	Thalassiosirales
MATOU-v2.145911980_6	145911980	RYDSFMMYKGRITRYILVRLKDPDWKQQSILILACVASVARHIFIWNVTSTLVIAIIVNKKLWGLYSFHGYRHPIRPSARTRFLCEMASVMTSMVMESLERTNDAARLMDIDQTLCNLQELSIIDYMGKSAYRKQIMELLGVNLIAFRKTDENGDVQTNNPALDPLHTLAFFQLNPGVVNSLDVLLSRKAMIELVEWGGDPEKTLESDGTLSPRSSFTSFVKGHLKKGKPWDDADRERVRRFGEKLEKYRSTEVFQKQNEAIQNLGQEHKELIADQKGNLDFFAFMAHELRTPFHGVLGSLEAMKEDPTIANNQLLNQAYMCGKNMIRILDDILLVAKGSYSLNITEQSVDLSQFLQETVTDMQNFAYMEGVSVRIRKEDIIHKKAASDFNRIRQVIHN…	Centric	Bacillariophyta	Coscinodiscophyceae	Thalassiosirales
MATOU-v2.146065001_4	146065001	TENSKEAQKLRIEELRKEFEGFILKKTPRVLVVDDATINRKICSRKIKKLLPSIEITECASGKACIEEYEHDHANIMGIFLDFHMPGMDGDEVARKIREFEKLHEDVKQEVWIVGYTADILEDTKKVLLDAGMNSVMPKPEPMHAFEEALRIMARRAGNEE*ERGYCIVR	Centric	Bacillariophyta	Coscinodiscophyceae	Thalassiosirales
MATOU-v2.146102155_6	146102155	QNLGQEHKELIADQKGNLDFFAFMAHELRTPFHGVLGSLEAMKEDPTIANNQLLNQAYMCGKNMIRILDDILLVAKGSYX	Centric	Bacillariophyta	Coscinodiscophyceae	Thalassiosirales
MATOU-v2.146252653_5	146252653	SKDTMDVPPSTFDCLQDSYGQVCKDYGVVFIDETNNPAIGQLHTLAFFQLNPGVVNSLDVLLSRKAMVX	Centric	Bacillariophyta	Coscinodiscophyceae	Thalassiosirales
MATOU-v2.146252654_2	146252654	MVMESLERTNDAARLMDIDQTLCNLQELSIIDYMGKPAYRKQIMELLGVNLIAFRKTDENGDVQIHTYCDTSX	Centric	Bacillariophyta	Coscinodiscophyceae	Thalassiosirales
MATOU-v2.146389608_2	146389608	IDQTLCNLQELSIIDYMGKTAYRKQIMELLGVNLIAFRKTDENGDVQIHTYCDTSKDTMDVPPSTFDCLQDSYGX	Centric	Bacillariophyta	Coscinodiscophyceae	Thalassiosirales
MATOU-v2.146776514_5	146776514	HNLVSNAIKFSEEDINIELLQRKSFSEVLTVWKTYTSSYPNHEPRIKDISPPNNLSGGSDEEESWIILSVIDKGIGIKNDDLAKLGTAFTQLSQGRQKKYQGTGLGITISNMIIDALKGQLIVFSAPDYGSCFTFAIPVKTVKEVTKEKKTENSKEAQKLRIEELRKEFEGFILKKTPRVLVVDDATINRKICSRKIKKLLPSIEITECASGKACIEEYEHDHANIMGIFLDFHMPGMX	Centric	Bacillariophyta	Coscinodiscophyceae	Thalassiosirales
MATOU-v2.146776515_1	146776515	YKRVNYAMIMELKLI*HY*ILLLVHRYLCYYNPMLLIKLDLWYGVLHPLLLWRVVYMQRMVVELVVEIPIQVQYEHF*FVLVDYYHQDVNHAVLHNLDNIF*LRLKIWTRRKKTMKQKVKGMQRVKEMP*YLCNLLHMIYVNVGVSKKWLV*YVHVLCQKLRMTGEWYIDLTLVMVVERLFMKLLDDPSDGSGEVVYETTRWDARSCCRDDSFLGLRFPAGDIPRQARELFMKNTLRFVYDVQGKDHSLYPSKIEGSGLETTKYTDLSMCRLRGSSHIHLEYLRNMNVTSTLVIAIIVNKKLWGLYSFHGYRHPIRPSARTRFLCEMASVMTSMVMESLERTNDAARLMDIDQTLCNLQELSIIDYMGKSAYRKQIMELLGVNLIAFRKTDENGDVQIH…	Centric	Bacillariophyta	Coscinodiscophyceae	Thalassiosirales
MATOU-v2.146776515_3	146776515	QKSKLRDDNGIKVDITLLNSIIGSPLSLLLQSDAVDQVRSVVRGATSSSSVEGGVHAKDGGGISSGNTNTGAVRTFLIRTRGLLSSGRKSCGITQSGQHFLIEIEDMDEEKEDDETKGEGDAKGEGDAMIFMQSIAHDLRKCWSIEEMAGLVCSRIMSETPYDRGMVYRFDPSDGSGEVVYETTR*P**W*WRGCL*NYSMGC*ELLP***FLRFEISCWGYTSSG*GIVYEEHVTIRL*CTREGSLVIS**D*RIRIGNNKVY*S*HVSPPWLVTYSFGISPKHERNLHSCYCHHRQQETLGSILFSWI*TPYSTICTY*ILM*DGICHDINGYGKFRTYERCGTSHGY*SDSLQPPRT*YY*LHG*ISLP*ADHGTPGCESNCLS*NG*EWRCSNPY…	Centric	Bacillariophyta	Coscinodiscophyceae	Thalassiosirales
MATOU-v2.146989229_6	146989229	MDGDEVARKIREFEKLHEDVKQEVWIVGYTADILEDTKKVLLDAGMNSVMPKPEPMHAFEEALRIMARRAGNEE*ERGYCIVRKESRLH*SALI*VKCNTX	Centric	Bacillariophyta	Coscinodiscophyceae	Thalassiosirales
MATOU-v2.147202893_6	147202893	EFESFSFSDAGARKSPRVLVVDDSTINRKICVRKVKKLLPAVEITQCPSGKRCLDEYFHDHENIIGIFLDFHMPQMDGDVVAX	Centric	Bacillariophyta	Coscinodiscophyceae	Thalassiosirales
MATOU-v2.148127893_6	148127893	KGIGIKADDLIKLGTAFTQLSQGKQKKYQGTGLGITISNMIIDALHGQLVVFSAPEYGSCFTFAIPVKCAKEITKEKKTLNSKEEQKLRIEQLQAEFX	Centric	Bacillariophyta	Coscinodiscophyceae	Thalassiosirales
MATOU-v2.148144029_6	148144029	VHAKDGGGISSGNTNTGAVRTFLIRTRGLLSSGRKSCGITQSGQHFLIEIEDMDEEKEDDETKGEGDAKGEGDAMIFMQSIAHDLRKCWSIEEMAGLVCSRIMSETPYDRGMVYRFDPSDGSGEVVYETTRWDARSCCRDDSFLGLRFPAGDIPRQARELFMKNTLRFVYGDIPRQARELFMKNTLRFVYDVQGKDHSLYPSKIEGSGLETTKYTDLSMCRLRGSSHIHLEYLRNMNVTSTLVIAT	Centric	Bacillariophyta	Coscinodiscophyceae	Thalassiosirales
MATOU-v2.148187433_5	148187433	ASPATATDADNGAWKQKRLLDAIVGSPLSLFLRPEAVDQVRAVVRGAKSPVKVDSTANGDPTSGGSAGX	Centric	Bacillariophyta	Coscinodiscophyceae	Thalassiosirales
MATOU-v2.148199581_4	148199581	EGQAVGRCGSAASQAVCGED*EVSEFRGV*ETERGDPYFR*GTEGADGGSEGQSRLLRLHGSRAPHTLSWSPRLPRGDARGPQSGEQPAPQPGVHIWQEHDPHPRRHPFGRQRQLQPQDRGATRGRVRVFAQIEEQPVDVSEFLHQTVADMKSYAYMEGVSVRVRKEDLIYQRNVSDFNRIRQVVHNLISNAIKF	Centric	Bacillariophyta	Coscinodiscophyceae	Thalassiosirales
MATOU-v2.148199581_6	148199581	KGKPWDDADRQRVKRFAEKIEKYRSSEVFEKQNEAIRTLDEERRELMEDQKVNLDFFAFMAHELRTPFHGVLGSLEAMREDPNLANNQLLNQAYISGKNMIRILDDILLVAKGSYSLKIEEQPVDVSEFLHRSRSNPWTCPSFCTRPWRT*KATHIWKECPSECARRT*FTNAMSATSIGSGRWCTI*SATLSNX	Centric	Bacillariophyta	Coscinodiscophyceae	Thalassiosirales
MATOU-v2.148287135_6	148287135	ANIMGIFLDYHMPGMDGDEVARKIREFEKLHEEIKHDVWIVGYTADILEETSKILLDAGMNSVLPKPEPMYAFEESLRIMMQRATTGKD*FELLA*YLTHREIRSRC*CQRDMKFS	Centric	Bacillariophyta	Coscinodiscophyceae	Thalassiosirales
MATOU-v2.148340651_5	148340651	RQARELFMKNTLRFVYDVQGKDHSLYPSKIEGSGLETTKYTDLSMCRLRGSSHIHLEYLRNMNVTSX	Centric	Bacillariophyta	Coscinodiscophyceae	Thalassiosirales
MATOU-v2.148820875_6	148820875	QI*YRRR*GRDVLLQFD*PIIAVAL*RITQYLHLLCRHNNVLSIPNTTAYNTKMTSTKETKAADMTPALSCEREPIHIVNRIHPCGNLLVVDSNLTIVQCSTNACDLLPPDYKPEENNTDNKNLNLSATELDINKLDPRLQKSKLRDDNGIKVDITLLNSIIGSPLSLLLQSDAVDQVRSVVRGATSSSSVEGGVHAKDGGGISSGNTNTG	Centric	Bacillariophyta	Coscinodiscophyceae	Thalassiosirales
MATOU-v2.148832398_5	148832398	LIRTRGLLSSGRKSCGITQSGQHFLIEIEDMDEEKEDDETKGEGDAKGEGDAMIFMQSIAHDLRKCWSIEEMAGLVCSRIMSETPYDRGMVYRFDPSDGSGEVVYETTRWRLFMKLLDGMLGVVAVMIVS*V*DFLLGIYLVRLGNCL*RTRYDSFMMYKGRITRYILVRLKDPDWKQQSILILACVASVARHIFIWNISET*T*PPLLLLPSSSTRNFGVYTLFMDIDTLFDHLHVLDSYVRWHLS*HQWLWKV*NVRTMRHVSWILIRLFATSKNLVLLITWVNQPTVSRSWNSWV*I*LPFVKRMRMAMFKSIHTVIRLKIRWMFLLLPLTVYKTRTVRFVKITAWYLSTRQTTLHLIHYIRLLSSS*ILVL*IL*MCCSVERR*SNSLNGEEILR…	Centric	Bacillariophyta	Coscinodiscophyceae	Thalassiosirales
MATOU-v2.148832398_6	148832398	NSYSWIIIIRT*IMRYYTIWTTFSN*D*RYGRGERRR*NKR*RGCKG*RRCHDIYAIYCT*FT*MLEYRRNGWFSMFTYYVRNSV*PGNGISI*P**W*WRGCL*NYSMEVVYETTRWDARSCCRDDSFLGLRFPAGDIPRQARELFMKNTLRFVYDVQGKDHSLYPSKIEGSGLETTKYTDLSMCRLRGSSHIHLEYLRNMNVTSTLVIAIIVNKKLWGLYSFHGYRHPIRPSARTRFLCEMASVMTSMVMESLERTNDAARLMDIDQTLCNLQELSIIDYMGKSAYRKQIMELLGVNLIAFRKTDENGDVQIHTYCDTSKDTMDVPPSTFDCLQDSYGQVCKDYGVVFIDETNNPALDPLHTLAFFQLNPGVVNSLDVLLSRKAMIELVEWGGDPEK…	Centric	Bacillariophyta	Coscinodiscophyceae	Thalassiosirales
MATOU-v2.148877732_2	148877732	VELVEWGGDPEKTVESDGTLSPRSSFSSFVKGHLKKGKPWDDADRQRVRRFIEKLDKYRSTEVFQRQHETIETLGKEHKELIADQKX	Centric	Bacillariophyta	Coscinodiscophyceae	Thalassiosirales
MATOU-v2.148893823_5	148893823	YGSCFTFAIPVKCAKEITKEKKTLNSKEEQKLRIEQLQAEFESFNLKKNPRVLVVDDATINRKICSRKVKKLLPSVEITECANGKSCVEEYVHDHANIMGIFLDYHMPGMDGDEVARKIREFEKLHEX	Centric	Bacillariophyta	Coscinodiscophyceae	Thalassiosirales
MATOU-v2.148900395_6	148900395	LIRTRGLLSSGRKSCGITQSGQHFLIEIEDMDEEKEDDETKGEGDAKGEGDAMIFMQSIAHDLR	Centric	Bacillariophyta	Coscinodiscophyceae	Thalassiosirales
MATOU-v2.148974550_4	148974550	GSYSLNITEQSVDLSEFLQQTVTDMQNFAYMEGVSVRVRKEDIIEKRATSDFNRIRQVVHNLVSNAIKFSDEDINIEMLQRRTFTEVMTVWKTYSSSYPN	Centric	Bacillariophyta	Coscinodiscophyceae	Thalassiosirales
MATOU-v2.149032052_6	149032052	HGYRHPIRPTARTRFLCEMASVMTSMVMESLTRTNDAARLMDIDQTLCNLQELSIIDYMSNPSYKKQTMELLNVNLIAFRQTDGNGIVHIHTYSDDDNVAANVEVSAEQFDCLRDSYSQICKDYGAVFIDETNNPRMGSLHTLAX	Centric	Bacillariophyta	Coscinodiscophyceae	Thalassiosirales
MATOU-v2.149036328_4	149036328	GQVCKDYGVVFIDETNNPAIGQLHTLAFFQLNPGVVNSLDVLLSRKAMVELVEWVSSVHIVFA	Centric	Bacillariophyta	Coscinodiscophyceae	Thalassiosirales
MATOU-v2.149057432_2	149057432	GKSCVEEYVHDHANIMGIFLDYHMPGMDGDEVARKIREFEKLHEEIKQDVWIVGYTADILEETSKILLDAGMN	Centric	Bacillariophyta	Coscinodiscophyceae	Thalassiosirales
MATOU-v2.149249920_1	149249920	LDAIVGSPLSLFLRPEAVDQVRAVVRGAKSPVKVDSTANGDPTSGGSAGGSSSGGNTDAVRTFLVRTQGALCNGRKSCGVTQSGX	Centric	Bacillariophyta	Coscinodiscophyceae	Thalassiosirales
MATOU-v2.149287634_4	149287634	PSQIQGMEEAKYTDLSMCRLRGSSHIHLQYLRNMKVTSTLVIAIIVNKRLWGLYSFHGYRHPIRPSARTRFLCEMASVMTSMVMESLTRTNDHSRLMDIDQTLCNLQELSLVDYMDTPSYSKHLMKLLDVNLVAFRKVDEDGNAHIHTYTDDEAGILCDKDKVSPAAFQCLRDTYGQVCRDYGVVFIDETRVNPTLGSLHTLAFFQLPGVTGLDVLLSRKSVVEHVEWGGDPEKTLQSDGTLSPRSSFARFVKGHLKKGKPWDDADRQRVKRFAEKIEKYRSSEVFEKQNEAIRTLDEERRELMEDQKVNLDFFAFMAHELRTPFHGVLGSLEAMREDPNLANNQLLNQAYISGKNMIRILDDILLVAKGSYSLKIEEQPVDVSEFLHQTVADMKSYAY…	Centric	Bacillariophyta	Coscinodiscophyceae	Thalassiosirales
MATOU-v2.149287635_4	149287635	KCLPCAVHFVLD*LTTAKVFLCII*FVRLATKTLNAPSFCK*RHLICPRLSLI*PYHPSYMSISHTKRYTADILDSTRNILLEAGMNQVMPKPEPMHAFEAELRTMIRRAANEEDVRDS*HFTQDETSSGRGDEPHHAKAGANALVRANAQRQ*C*LCRFSR*LI**SRRYAIAFW	Centric	Bacillariophyta	Coscinodiscophyceae	Thalassiosirales
MATOU-v2.149522225_1	149522225	DGSGDVVYETTRWDARSCCREDSFLGLRFPASDIPRQARELFMKNTLRFVYDVQGKDHALYPSQIQGMEEAKYTDX	Centric	Bacillariophyta	Coscinodiscophyceae	Thalassiosirales
MATOU-v2.149585889_1	149585889	VMPKPEPMHAFETELRTMIRRAANEEDVRDS*YFTQRKTSS*TRG*TTPCQSRSKCTRSRRNCGP*SGGR	Centric	Bacillariophyta	Coscinodiscophyceae	Thalassiosirales
MATOU-v2.152267563_1	152267563	SYGLKIQEEAVDVSEFLRQTIADMRNFAYMEGVSLRVRKEDVHIAPRLVSDFNRIRQVVHNLISNAIKFSEDDIYVELLQRRTFC*LCGRHIQLAMPITSLGSRTLPLQATTMVDLMLTMHIFGLFFLS*IRVLASRRMIY*N*VQHLRN*ARVARRNSRELGWVSRSAI*L*AHL*AH*RASLSCSVLRIMAVASRSPFLSSGARSRLWRTGTPIARKRRKRQNFDFGQSSKTFVFPMVARKNHREYWWWTIPLSIGKYAHER*TNFFPLLK*LNVQMVHVASRNMSMIIKIFWASFWTSTCQVWTGMSSQERFGNLRSYRRM*MTEFGLLGTPLIFLMKQRMFS*KQG*TVSCRSQNQCMHFKRSYEQ*SEERQRRHNLHKGYLY*KX	Centric	Bacillariophyta	Coscinodiscophyceae	Thalassiosirales
MATOU-v2.152267563_3	152267563	LWTKDTRGSG*CE*VSPPDHRRHEEFCLHGGSVAQSA*GGCTYRPTISERLQSYQAGGSQPNIQCHQIF*G*HLCRIASKTYILLTVWKTYTASYAHHEPRLKDIAPSSNNNGGSDADDAHLWIILSVIDKGIGIKANDLLKLGTAFTQLSQGRQKKFQGTGLGITISNMIVSAFVSALKGQFVVFSAPDYGSCFTFAIPVKRSEEPTLENRNPNSKEAKEATKLRLRAEFENFRFSNGGTEKSPRVLVVDDSTINRKICSRKVNKLLPAIEITECANGARCIEEYEHDYKNILGIFLDFHMPGMDGDVVARKIREFEKLQEDVDDGVWIVGYTADILDETKNVLLEAGMNRVMPKPEPMHAFQEELRTMIRRAAKEA*FT*RLFVLKX	Centric	Bacillariophyta	Coscinodiscophyceae	Thalassiosirales
MATOU-v2.157404985_1	157404985	SNLQQVNLTHFMSDPNHHKLLMERMDVNLIAFREIDVDGISHIHTFCDDESNTVEVSAAAFDCLNDTYGQVCRDYGVVFVDETRSNKALGSLHTLAFFQFPGIGLTSLDVVLSRKAVVAVVEVVQWGGDPNKSLESDGTLSPRSSFASFMKGHLKKGKPWDYDDKQRVRRFAERVEKYTSTEVAAKQNEALQKLDHEKKDLIQDQKDNLDFFAFMAHEMRTPFHGVLGSLEAMREDPTLVNNALLNQAYMCGKNMIRILDDILLVAKGSHSLNIKEETVNVSEFLRHSVADMTNFAYMEGVSVRVRKEDVTSPLLVSDFNRIRQVVHNLISNAIKFSEEDIYVECLQRKTFTEVLTVWKTYAHTYPNHEPGLKNFRPKQVEDDNDNCWIIFSVIDRGIG…	Centric	Bacillariophyta	Coscinodiscophyceae	Thalassiosirales
MATOU-v2.43376948_4	43376948	KQRRPLPDLLWACISTTSS*SMSAPAAATDPPAAPGASSSSSSNDYSKQNVPLQCEREPIHIVNRIQPCGTLLVVDSECSVNAVDLLPADFAWEEESGSGSSDDDGTSQSKARAMGYDPRLDAIIGRDLGLLLQPEAVEQIGSLVSSAGAQESHTHASSGHAHRGSAGSSMDDLRSSVLSHISHQDSLSSLTGALGAAHLGTTGGAYGGKTGTTATAGGGGATLGGGKGGAEAARNFLIRSKATGNLSLASKSCSVTQSGEFFLLEIEDLCTEHGSSGATSGGSDAHAGGAADEETTETEIADLGDRDVMLFMEGIARELRRCWSIEEMASLVCSRIMTETPYDRGMVYRFDPGDDSGEIIYESFRQDARTECRKDSFLGLRFLRHPPPGSRAVHAQHP…	Centric	Bacillariophyta	Mediophyceae	Cymatosirales
MATOU-v2.43376948_6	43376948	SKEGLFQIFFGPASVLRVARVCRHLRQQPTPQQPRGRAAAAAVMTTPSRTCRCSASGSRSTS*IASSRVGRSWLSIPNARSMPSTCCRPTLRGRRRAAAVAVMMMAQVKVRPGPWGMIPASTPSSAETSACSSSPRPSSRSEASSRRRGRRNRIRMHRPATPTEARQARAWTICAPRSSATSPIRTPSRPSPAPSGPPTSGRRGELMEAKRGRQPQPAEEAPLSGVGRAAPRPPATSSSGPRRRET*AWRANRAASRSPGSSFCWRSRICALSTVAVVLLVGEVMHMLEEPPTRRPPRLRLRTSGTGTSCSSWRASPGN*DGVGALKKWPVSFAAAS*RRRRTIAVWSTASIPGTILARSSTRASGKTPGRNAGRTPSSVCGSSDIPRQARELFMRNTL…	Centric	Bacillariophyta	Mediophyceae	Cymatosirales
MATOU-v2.43645338_6	43645338	HALFPSQVQGMGEAKKYTDLSMCRLRGSSYIHLEYLRNMKVTSTLVISIIVNKRLWGLYSFHGYRHPIRPSA	Centric	Bacillariophyta	Coscinodiscophyceae	Thalassiosirales
MATOU-v2.43740524_2	43740524	SDLIEDQKVNLDFFAFMAHELRTPFHGVLGSLEAMREEPTLSNNQLLNEAYMCGKNMIRILDDILLVAKGSYSLNIQDETVDVTDFLRQTVADMRSFAYMEGVSVRVRKEDVFHQRATSDFNRIRQVVHNLISNAIKFSEEDIYIELLQRRTFSEVLTX	Centric	Bacillariophyta	Coscinodiscophyceae	Thalassiosirales
MATOU-v2.44371871_6	44371871	QATVEQVQWGGDPDKKLESDGTLSPRNSFAAYVKGHLKKGKRWDESDKTIINRLVDQIEKYRSNEIFAEQSEAIQTLEAEKKQAMDENTTSYAFFAHMAHELRTPFHGILGSLEAMREDPLLANNEMLRTAELCGKNMLKILDDILLVAKGSYSLELEEQSVDVLDFLRRTLADMTSYAYMEGVSIRVRKEDVFHRRLQSDFSRIRQVVHNLISNAIKFSENDIAIEVLERGSFRDVLSVWGTYMNSYPSCEPSLKDLAFSAEETANGSQENTLWLIVSVIDKGIGIGAADLKRLGIAFTQLSQGRQKKYQGTGLGINICQMIITALRGKLVIFSAKDYGSCFTFAVPVKMGAKDEADSQAGKMRKMPKSSKSEKQARMAALQAEYESLGIAARNPKLL…	Centric	Bacillariophyta	Mediophyceae	Cymatosirales
MATOU-v2.44408722_1	44408722	GERRAEKSERERERDPSAHK*YVAHPEVADRSVVLFLWLATSTYNKSSEGREVSLGSAHKAKKASSRSSLGLHQYYE*LEYVGTCGSNRPPSSPGGEQQQQQ**LLQAERAAAVRAGADPHRESHPAVWDAPGCRFRIARRAVLGQCRRPAAGRLCVGGGERQR*Q***WHKSK*GQGHGV*SPPRRHHRQRPRPAPPARGRRADRKPRLVGGGAGIAYACIVRPSSMDDLRSSVLSHISHQDSLSSLTGALGAAHLGTTGGAYGGKTGTTATAGGGGATLGGGKGGAEAARNFLIRSKATGNLSLASKSCSVTQSGEFFLLEIEDLCTEHGSSGATSGGSDAHAGGAADEETTETEIADLGDRDVMLFMEGIARELRRCWSIEEMASLVCSRIMTETP…	Centric	Bacillariophyta	Mediophyceae	Cymatosirales
MATOU-v2.44408722_2	44408722	ANGEQRRVRERERETRLHISDT*HIPRWQIEALFCSFGLLRAHTTSQVKAEKFRSDQHTKQRRPLPDLLWACISTTSS*SMSAPAAATDPPAAPGASSSSSSNDYSKQNVPLQCEREPIHIVNRIQPCGTLLVVDSELRVVQCSVNAVDLLPADFAWEEESGSGSSDDDGTSQSKARAMGYDPRLDAIIGRDLGLLLQPEAVEQIGSLVSSAGAQESHTHASSGPRAWTICAPRSSATSPIRTPSRPSPAPSGPPTSGRRGELMEAKRGRQPQPAEEAPLSGVGRAAPRPPATSSSGPRRRET*AWRANRAASRSPGSSFCWRSRICALSTVAVVLLVGEVMHMLEEPPTRRPPRLRLRTSGTGTSCSSWRASPGN*DGVGALKKWPVSFAAAS*RRRR…	Centric	Bacillariophyta	Mediophyceae	Cymatosirales
MATOU-v2.46353720_1	46353720	EFEAFGFGEEGERKRPRVLVVDDSTINRKICSRKIKKLLPKVEITECSNGQTCIQEYEHDHQNIMGIFLDFHMPGMDGDVVARNIREFEKTHEGVDVSQGGVWIVGYTADILDETKNVLLDAGMNRVLPKPEPMHAFQTELRTMIQRAAA	Centric	Bacillariophyta	Coscinodiscophyceae	Thalassiosirales
MATOU-v2.46413019_4	46413019	NFAYMEGKSVRIRKEDVKHQLLISDFTRVRQVVHNLISNSIKFSKGEEDVYVECLQRQTFSEVLTVWKTYAANYPNHEPRLKD	Centric	Bacillariophyta	Coscinodiscophyceae	Thalassiosirales
MATOU-v2.5172576_1	5172576	VAQSKGYGGASRMGRRSRENTRIGWYFIAAI*FY*LCERSSQERKALG*RRPRTSEEIW**A*KVSIYRGLSETK*GNPELGSRAQGVDC*SEG*S*LLCVYGS*IEDPIPRSVRLFRGNEGRPELRTPFHGVLGSLEAMKEDPTIANNQLLNQAYMCGKNMIRILDDILLVAKGSYSLNITEQSVDLSQFLQETVTDMQNFAYMEGVSVRIRKEDIIHKKAASDFNRIRQVIHNLVSNAIKFSEEDINIELLQRKSFSEVLTVWKTYTSSYPN	Centric	Bacillariophyta	Coscinodiscophyceae	Thalassiosirales
MATOU-v2.5172576_2	5172576	LLSRKAMVELVEWGGDPEKTLESDGTLSPRSSFTSFVKGHLKKGKPWDDADRERVRRFGDKLEKYRSTEVFQKQNEAIQNLGQEHKELIADQKGNLDFFAFMAHELRTPFHGVLGSLEAMKEDPN*GPHSTEC*AL*RQ*RKTQQ*QTTNC*IKLTCVARI*YVFWMISFLWQRVATASTSPSKVLTCHSFYKRLSQICKTLLTWKAFQFESVKRISFTRKRRLISTEYDK*FTTWSVMPSSSPRRISISSCYRGSPSQKY*RYGRLTLLHIPT	Centric	Bacillariophyta	Coscinodiscophyceae	Thalassiosirales
MATOU-v2.51861420_6	51861420	GAGDAKGEGDAMIFMQSIAHDLRKCWSIEEMAGLVCSRIMSIVGKSIN*PCGSSGSYKSTKGIIAGCNLN*SPSGX	Centric	Bacillariophyta	Coscinodiscophyceae	Thalassiosirales
MATOU-v2.5338998_1	5338998	LSVIDKGIGIKADDLAKLGTAFTQLSQGRQKKYQGTGLGITISNMIIDALKGQLIVFSAPDYGSCFTFAIPVKAVKEVTKEKKTDNSKEAQKLRIEELX	Centric	Bacillariophyta	Coscinodiscophyceae	Thalassiosirales
MATOU-v2.5372746_3	5372746	EEDINIELLQRKSFSEVLTVWKTYTSSYPNHEPRIKDISPPNISGGQDDEDSWIILSVIDKGIGIKADDLAKL	Centric	Bacillariophyta	Coscinodiscophyceae	Thalassiosirales
MATOU-v2.5381989_3	5381989	VTKEKKTDNSKEAQKLRIEELRKEFESFNLKKSPRVLVVDDATINRKICSRKIKKLLPSIEITECASGKACIEEYEHDHANIMGIFLDFHMPGMDGDEVARKIREFEKLHEDVKQEVWIVGYTADILEDTKKVLLDAGMNSVMPKPEPMHAFEEALRIMARRAGNEE*EQRILYSX	Centric	Bacillariophyta	Coscinodiscophyceae	Thalassiosirales
MATOU-v2.5396142_4	5396142	YRHPIRPSARTRFLCEMASVMTSMVMESLERTNDAARLMDIDQTLCNLQELNIIDYMSKPAFRKQIMELLGVNLIAFRKTDENGDVQIHTYCDTS	Centric	Bacillariophyta	Coscinodiscophyceae	Thalassiosirales
MATOU-v2.5716600_2	5716600	DDSTINRKICSRKVKKFLPAIEITECSSGLRCIEEYEHDSKNIMGIFLDFHMPGMDGDVVARNIREFEKLHEDIADRPVWIVGYTADVLDX	Centric	Bacillariophyta	Coscinodiscophyceae	Thalassiosirales
MATOU-v2.5750200_1	5750200	MNKVMPKPEPMHAFEEELRTMIRRAADKADAA*RNQS*HLDQVHTLHEP*RGQCKDVVRLSGQP*MTWAGNYKSLARAKTISRSILLSSANL	Centric
MATOU-v2.96049923_1	96049923	HPTA*QKTL*IT*S*SHFIPQKEWKWNISNIHRW*STDEGDAGGISKSGRHLRTGL*GLWRGVC**NDNKSSPRITSYYCLLSISWCRRA*CSAQPKGSGRNGRVGGRPRKDIAGRWDVVATVEFRKLCQGSSQEGQALGRC**GESEAFFGEA*EIPIDRGV*ETK*GD*KSWGQERSDLIQSQKENLEFFAFMAHELRTPFHGVLGSLDAMREDPTLANNQLLNNAYMSGKNMIRILDDILLVAKGSYGLKIQEEAVDVSEFLRQTIADMRNFAYMEGVSLRVRKEDVHIAPRLVSDFNRIRQVVHNLISNAIKFSEDDIYVELLQRRTFSEVLTVWKTYTASYAHHEPRLKDIAPSSNNNGGSDADDAHLWIILSVIDKGIGIKANDLLKLGTAFT…	Centric	Bacillariophyta	Coscinodiscophyceae	Thalassiosirales
MATOU-v2.96049923_2	96049923	TPLHSKKLFELLEVDLISFRKKNGNGTSQIYTGGDQLTRVTPEAFQSLEDTYGQVCKDYGVVFVNETTTNPALGSLHTIAFFQFPGVEGLDVLLSRKAVVEMVEWGGDPEKTLQDDGTLSPRSSFANFVKGHLKKGKPWDDADKERVRRFLERLEKYRSTEVFEKQNEAIENLGARNEVT*SNRRRKILNSLHSWPTSFVLPSMVSLARLTQCARTLL*RTINFSTTLI*VGKT*FVSWMTSCLWRRAVMD*RYKRKRLM*VSFSARPSQT*GILLTWRECRSECVRRMYISPHD**ATSIVSGRWFTT*YPMPSNFLRMTFM*NCFKDVHSLRC*LCGRHIQLAMPITSLGSRTLPLQATTMVDLMLTMHIFGLFFLS*IRVLASRRMTY*N*VRHSH…	Centric	Bacillariophyta	Coscinodiscophyceae	Thalassiosirales
MATOU-v2.96209813_1	96209813	AVRTFLVRTQRALSIGRSSCGVTQSGEHFLLEIEDQETPPVAEEEGSGDAEGEEDTMIFMQSIAHELRKCWSIEEMAGLVCSRIMSETPYDRGMVYRFDPCDDSGEVIYETTRWDARR	Centric	Bacillariophyta	Coscinodiscophyceae	Thalassiosirales
MATOU-v2.96222357_3	96222357	HLEYLQNMKVTSTLVIAIIVNKRLWGLYSFHGYRHPIRPSARTRFLCEMASVMTSMVMESLMRTNDQSRLMDIDETMSALKEISLTDLLVTPPNS	Centric	Bacillariophyta	Coscinodiscophyceae	Thalassiosirales
MATOU-v2.96308770_3	96308770	FGDNRLVDQIEKYRSNEIFAEQSEAIQTLEAEKKQAMDENTTSYAFFAHMAHELRTPFHGILGSLEAMREDPLLANNEMLRTAELCGKNMLKILDDILLVAKGSYSLELEEQSVDVSDFLRRTLADMTSYAYMEGVSIRVRKEDVFHRRLQSDFSRIRQVVHNLISNAIKFSENDIAIEVLERIAIEVLERGSFRDVLSVWGTYMNSYPSCEPSLKDLAAFSAEETANGSQENTLWLIISVIDKGIGIGAADLKRLGIAFTQLSQGRQKKYQGTGLGINICQMIITALRGKLVIFSAKDYGSCFTFAX	Centric	Bacillariophyta	Mediophyceae	Cymatosirales
MATOU-v2.96405251_2	96405251	EIELLDVIVGSPLSLLLHSEAVDKVRAIVRGATSSSAKADNPNGETPKVEGRSGTNTNAGAVRTFLVRTQX	Centric	Bacillariophyta	Coscinodiscophyceae	Thalassiosirales
MATOU-v2.96548895_1	96548895	REGAIMTKSTPRTLDGADYAPQVTPLSCEREPIHIVNRIQPCGTLLVVDTELKIVQCSTNAVG	Centric	Bacillariophyta	Coscinodiscophyceae	Thalassiosirales
MATOU-v2.126745165_4	126745165	TMDTNDSIPIRGPIVVCDDNVVNVKILKRGLELDLKNQNLEQLEILTADGGTKAVELYQERRPSLLFVDYHMP	Pennate	Bacillariophyta
MATOU-v2.126753172_2	126753172	GGQAAFDLYKAERPSVLFIDYHMPEVDGLQATEMIRKFEADNDLQPSYIISYTADVTEKAAQLLLSRGTNEIMSX	Pennate	Bacillariophyta	Bacillaryophyceae	Bacillariales

## Sheet: Sheet5
Diatom Aureochromes sequences identified in the Tara Oceans data (MATOU-v2)				Taxonomic annotation fom Tara
ProteinID	GeneID	Sequence	Group (from phylogenetic tree)	phylum	class	order
MATOU-v2.63889_3	63889	FVITDPSLQDNPIVYASDDFLQVTGYSRDEVLGRNCRFLQGADTNPEKVEKIRKNLLEGEDVRTCFLNYTADGTPFWNQLFIAALRDTQNNIVNFIGVIVKVAGPPPDDIEYGKQETGEKSLVDNEVKTEGNEVTEEEMAGAVSDVTINPVKLPTP**MCKFALFACFM*NLETKF*VTYKLSSX	Centric
MATOU-v2.1993832_6	1993832	EKVDLIRKGVATGDDVSVTLVNYTADGTPFWNKLFVAALRDAQNNIVNFIGVIVKVASPEPGDPDFG	Pennate	Bacillariophyta	Bacillariophyceae	Bacillariales
MATOU-v2.2573621_3	2573621	IASSLQRERPYSCQKKRTRIT**RHRKQLQHQ*HLVSLMMGQVCRLAWRGVSQRRIWINRVFLHQ*WVQRQRHRPQQRQSRSCKLHKKKIT*GLRLCRTLPATGRATKSRRTRKMSEQQQNERRERNREHAKRSRIRKKFLLESLQQSVQLLKEENEKLKDSIKIHLGEDTANKLLAPEHLQSISSSLASSGAAGAAPTLPAGKEGILATGKEEANKVLDDPDFNFIKALQTAQQNFVVTDPSLPDNPIVYATQGFLSLTGYTLDQVLGRNCRFLQGPETDPKAVDKIRKAIEDGVDMSVCLLNYRADGTTFWNQFFIAALRDASGNVTNYVGVQCKVSDQYAATVCKRQHEIDHVDVAEEEDN*SCCIYLHSSYANMPILAYSIFLPTVSDAFTENTL…	Centric	Bacillariophyta
MATOU-v2.2862656_2	2862656	Y*CHRALKVSIRE*LINHYKLEQ*KHYLSLINFFYIFGFC*RFFLYRNKHTRDFWNQVIMSVVLNNNMFSLPCFTAASSYGKSTATSASGDEPTTNNSDNLISSIQNQLFDSTNDQDFDLLAEYLLDDGTLESTPTSGMDLEGYVGLATTSTEPVADSGNIYQQEASEAQKSIQATVTNLISQHIEGSDLLKYQQRQQKQEQQQPPTPLLHPGAALLAPSAVFPQANTAPQAAPVTTNNATIVHHQHSTTQNAVPTVGQKRDIDSVSTPNRHIQRTKSQAQIAKRRERNRILARRTRLRKKFFFESLQKEVMDLQRENYALKEIVKKNFETVAGTNLLNECKVGDLPSILASGDSSYGENNDMDDTDLTFITSVKKSQQCFVITDPSLHDNPIVFASED…	Centric
MATOU-v2.3262489_1	3262489	PVASPDLIHSTTPRVTTNTNLNSKRSFTDAIQSQTSSSMFNNNSNHTKTSMNAGKLTDQQRLERRIRNREHAKRSRLRKKFLLESLQDQIHGLQTDIEKLTSLIKKELPDSAAKMLQELELSNGTADNNEERSMYKPLPMPSGFGPVKALIEPDFRLMHSLSNSQQNFAISDPSLPDNPIIYVSQGFLDLTEYRLDQVLGRNCRFLQGPGTDQAAVEVIRKGMAEGIDTSVCLLNYKADGTPFWNQFFIAALRDANNKIVNYVGVQCEVSKAIVESHLEQIECEDEG*FALNQNNSSV*LIIGSFICHTKMX	Centric
MATOU-v2.3494399_6	3494399	ANTVLDDPDFNFIKALQTAQQNFVVTDPSLPDNPIVYATQGFLNLTGYSLDQVLGRNCRFLQGPETDPSAVDKIRMAIESGIDMSVCLLNYRVDGSTFWNQFFIAALRDANGNVTNYVGVQCKVSDQYAAVVCKKQQEEQEDKSTPGAQS*NNANPQVIKN*IFLSDDYQHFLFLILELP**ESLERTYIFIYITKAD*RRKQYQQHQVAID**C*ILQKX	Centric
MATOU-v2.3496296_5	3496296	DEVLGRNCRFLQGKDTSKDKVLSMKNAISRGEDVGVCMVNYTSDGTAFWNQLFIAALRDTQGNVVNFIGVLVMVHSPPKDDPEYGKX	Centric
MATOU-v2.4008367_4	4008367	EHAKRSRVRKKFMLESLQEQVASLQRENQRLRTLVQDNIPEHAQMIISECCTSSPLFTDGTFDGSQQSAGEDESGEAKKAALVRSDFQLIDSLSAGQQNFVLSDPRLPDNPIVFATPGFYKLTGYTAEQVLGRNCRFLQGSGTDPKTVDIVRKAIQSGSDCTVCILNYKADGTPFWNQFFVAALRDADNCIVNYVGVQTEIEADAGANALEDRVNAVMPLANVGVQTEIEADAGANALEDRVNAVMPLANKEDDEEEGKQKT*IQKKRNSKQNTKQF*SLKFI*SPG	Pennate	Bacillariophyta	Bacillariophyceae	Bacillariales
MATOU-v2.5130037_2	5130037	SNSGNS*ASISVVYTTLSSSWCLIL*FI*LF*SSSKKIHMDPNDLPDPAPIAKSDNNENATAMNLFAPDPNGGGEEPLDLDDLFQDCYFGEFGVPDDVTSSAVTASIEPIPPSQPATKRTAKQAGLVAPAPAAKSRAVASASAAAASSISTKPAASLTDAQKIERRERNREHAKRSRLRKKFLLESLQEQIDGFQGEIHTLRNIIKTELPDRAAELLKGLGDDCGSDDPSAPKKGSYEPVPLPSGFGPVKTLMEPDYRLMSALSGSQQNFAISDPSLPDNPIVYVSGGFLELTGYTLDQVLGRNCRFLQGPGTDQAAVDVIRKGVREGTDTSVCLLNYKADGTPFWNQFFVAALRDAENNVVNFVGVQCEVSKAVVEKHISEGKTPSSGLLM*VAELEK…	Centric	Bacillariophyta	Coscinodiscophyceae	Thalassiosirales
MATOU-v2.5210091_4	5210091	KGTSYSFTSSSAAALPPTTASMLSAGVGVDKSQAQLDRRRERNRILARRTRLRKKFFFESLQKEVADLQRENAALKSIVRGRLKPDDASTILTQCNAQEKLPSNVHSQEITSLMPAGVPSADVKKLDKDDFSLIQSIQNSQQCFIITDPSLHDNPIVFASNDFLTLTGYSQEEVLGRNCRFLQGQETSPDKVGQIRKAINAGEDVNVTFANYTSDGKPFWNSLFIAALRDADNNIVNFIGVIVKVPGPEKGDPEYGKILK*IEC*EVGE*RHMKDYCYVQVWSSQNTLGERG	Centric	Bacillariophyta	Coscinodiscophyceae	Thalassiosirales
MATOU-v2.5737329_4	5737329	NTFWNQFFIAALRDAGGNITNYVGVQCKVSDQYAASVCKKQEEADAAAVAGGNGASFKEES*L*AG*LKKK*RENDDCFPP	Centric	Bacillariophyta	Coscinodiscophyceae	Thalassiosirales
MATOU-v2.5754888_2	5754888	TMSNDCLSDIIPYRTESV*LINLIYGICQAGAENNGMTIDLDDLFHDCYFGDFSVSESIGNDSTTAEAPESQTPTPSTTSLLPSAQRNSFTPSSTTANVPPPVPSATYTPALTPATIMPQQQQQQQLTENLLKRKIPVVEPTPVSVLSSTPSYAHNTISTNNSTMYTYPPGFSTGTANSRQLTDQQKVERRNRNREHAKRSRLRKKFLLESLQEQIHGLQSEIEDLKSVIIKELPDRADAILEKINGKQGQFTPLPMPSGFGPVKTLMEPDFRLMSALSGSQQNFAISDPSLPDNPIVYVSQGFLDLTGYTLDQVLGRNCRFLQGPGTDQSAVDVIRKGVRQGVDTSVCLLNYKADGTPFWNQFFVAALRDAENNVVNFVGVQCEVSKAVVESQMTKSK…	Centric	Bacillariophyta	Coscinodiscophyceae	Rhizosoleniales
MATOU-v2.5815098_2	5815098	ANGTDATTCVLNYKADGTPFWNQFFIAALRDSENCIVNYVGVQCEIESDAGASALEDKVNAVLPLQFKDKNNDPVEKEN*FREYIF	Centric
MATOU-v2.5911498_2	5911498	HGNANNANKVLDDPDFSFIKALQTAQQNFVVTDPSLPDNPIVYATQGFLNLTGYTLDQVLGRNCRFLQGPETDPKAVEKIRNSIEDGTDMSVCLLNYRVDGTTFWNQFFIAALRDAEGNITNYVGVQCKVSDQYASTVCKKQEAADAAALQQQQQPTA	Centric	Bacillariophyta	Coscinodiscophyceae
MATOU-v2.5957869_4	5957869	IRKGVREGVDTSVCLLNYKADGTPFWNQFFVAALRDAENNVVNFVGVQCEVSKAVVESQISDRQN	Centric	Bacillariophyta
MATOU-v2.8751645_1	8751645	QTLQSAQRSFCITDPSLPDNPIVYASGSFLTTTGYSMDEVIGKNCRFLQGPATDPGAVADLKKGVASGEDTTVTILNYKKDGTPFWNQLFVASLRDINKRVVNYVGVQIPVAGPLPKPGDPPX	Centric
MATOU-v2.13160340_1	13160340	ILARRTRLRKKFFFESLQKEVTDLQKENMVLKEIVRSRFEEKKAEAVLKDCKANQELPQVVLEHCGDPSALARQDFNLIASIKQSQQSFVITDPSLQDNPIVYSSDGFLALTGYTREQVLGRNCRFLQGVDTNPDKVAEIRKALQVGDDVSVTFLNYRADGTPFWNKLFIAALRDAQNNIVX	Centric	Bacillariophyta	Coscinodiscophyceae	Chaetocerotales
MATOU-v2.13292886_4	13292886	WNKLFIAALRDAQNNIVNFIGVIVKVAGPEPNDP*AGKVLSGENATGAAANGQENKSGDGSVDADAAVMAIEGAVTAAVAAAPKGVV	Centric	Bacillariophyta	Coscinodiscophyceae	Chaetocerotales
MATOU-v2.17092533_3	17092533	RERNREHAKRSRLRKKFLLESLQEQIHGLQEQLDKFKKTIRAEIPSPKAESLIDEICGHENKYTPLPMPSGFGPVKTLMEPDFRLMSALSGSQQNFAISDPTLPDNPIVYVSQGFLDLTGYQLDQVLGRNCRFLQGPGTDQSAVDVIRKGISEGIDTSVCLLNYKADGTPFWNQFFVAALRDAENNVVNYVGVQCEVSKAVVEKHMGEQKKK*M**LVIFMVNKKE*EEYKQEDVWTREKISDETNGEG*SKEKWK	Pennate	Bacillariophyta
MATOU-v2.17150735_4	17150735	GTDQKAVDVIREGVEKGIDSSVCMLNYKADGTPFWNQVFVAALRDAKNNVVNYIGVQCEVGKAVVEKQQKDRSADLAARQKYMAKRA*WKVMIMRVTKGKRKRDRMRPNNGGILYRGQNQ**DMYVNKNDNNSNNKTVPVVMTPRRDRII	Centric
MATOU-v2.18048013_2	18048013	ALASGEQQVTTQASKIVTHGDQQQQAVPIQRGGGYYTTQLHDSSKPARTMGTMVQGVTKPTAAVPYKEAPQQRHHIQYATMTKKKSSRSSERKMSEQQKNERRERNREHAKRSRKRNREHAKRSRIRKKFLLESLQQSVAMLKEENDKLRDSIRQHVGEEQAEKLLEQKMDGSNGDMRLTTSSQGAANKVLDDPDX	Pennate	Bacillariophyta	Bacillariophyceae	Bacillariales
MATOU-v2.18048013_2	18048013	ALASGEQQVTTQASKIVTHGDQQQQAVPIQRGGGYYTTQLHDSSKPARTMGTMVQGVTKPTAAVPYKEAPQQRHHIQYATMTKKKSSRSSERKMSEQQKNERRERNREHAKRSRKRNREHAKRSRIRKKFLLESLQQSVAMLKEENDKLRDSIRQHVGEEQAEKLLEQKMDGSNGDMRLTTSSQGAANKVLDDPDX	Pennate	Bacillariophyta	Bacillariophyceae	Bacillariales
MATOU-v2.18183411_4	18183411	RERNRILARRTRLRKKFFFESLQKEVTELQKENAALRDIVRTEIEGDEGRQLLEQCNAARKLPREVLEACGENPDLDQEDFNLITERSS*SMRRKS*FGPRRL*SSHEYSTITTFICNYGSKPPGQPYCVCFR*FPYTDGLLKG*CARSEL*VFTRTEY*QRK	Pennate	Bacillariophyta	Bacillariophyceae	Bacillariales
MATOU-v2.18314008_6	18314008	GQSQQSQVNIPTSPTDVTTNNYFSNGAKPLTEKQKVQRRERNRKHAKRSRLRKKFLLESLQEQINGLQVELEALKGIVRKECPDKADKLIESVISNEDKYTAQPMPSGSGPAQTLMEPDYRLMKSLTGSQQNFAISDPSLPDNPIVYVSQGFLDLTGYTLKQVLGRNCRFLQGPGTDQAAVDVIRKGVREGTDTSVCLLNYKADGTPFWNQFFVGALRDAEKNIVNYVGVQCEVSKAVVDTQTLKI**DYYCKKSTMTTGRGTLISFDFISNF**QVM*ILYQKIAYDIKQIVENSKIKNHH*X	Centric
MATOU-v2.18381164_6	18381164	RVDGSTFWNQFFIAALRDAAGNITNFVGVQCKVSDTYAASVIKEQQKEEEEQQQQQQQQQQQQQDGAAGDIQ*KHKRGKTHN**KS*KKVHNFIWKIATSKQ*SSIVKKPTGHITRTRTRIMYTHSTKYRX	Pennate	Bacillariophyta
MATOU-v2.18532993_4	18532993	RWGPGSTASKVGKSATPTNQYGAFAEFGGGPITGHGGISDQAVAERRQRNREHAKRSRVRKKFMLESLQHEVRELQKENQSLRMLVQGKIPQHAQEIINKCCKKSVLFEDDNENSEGDQSKKKVQLVKSDFGLISSLTSGQQNFVLSDPRLLDNPIVYASEGFYQLTGYKREEVLGRNCRFLQGEGTDPKAIDVIRTAIANGTDATTCILNYKADGTPFWNQFFVAALRDSENCIVNYVGVQCAVDTNAGVSALEDKVNSVLPLQNRTESISQDDGKKLQ*GSV**GFTP*CLGSYSI*SVFHNSIVLFLVE*SCNI*IFIEHC	Centric	Bacillariophyta	Coscinodiscophyceae	Chaetocerotales
MATOU-v2.18544647_4	18544647	ANKVLDDPDFSFIKALQTAQQNFVVTDPSLPDNPIVYATQGFLNLTGYSLDQVLGRNCRFLQGPETDPKAVEKIRTAIDEGSDMSVCLLNYRVDGTTFWNQFFIAALRDAGGNITNYVGVQCKVSDQYAASVCKKQEEADIAAAAAAATKANSAGLKRKADEAP*HLSCFCFES*DLSMHKDYCGSQQIHLHTLF*LNSTLSDFASRDLAFIRRLR*AVWHEGTSHLQRTSQTRSHYLRRC*NLDTNCISICLDPNKSGLR*THGWGF	Centric	Bacillariophyta
MATOU-v2.18545467_2	18545467	ATGGDNSNKKRPANEIASSSKDGGGKLTVKQKLDRRERNREHAKRSRLRKKFLLESLQEQIHGLQEQIDKFKKTIRNEIAAPRAEQLIDEICGHEKKYTPLPMPSGFGPVKTLMEPDFRLMSALSGSQQNFAICDPTLPDIPIVYVSQGFLDLTGYRLDQVLGRNCRFLQGPSTDQAAVDVIREGISKGIDTSVCLLNYKADGTPFWNQFFVAALRDAENNVVNYVGVQCEVSKAVVEKHMGEQKTKNE*DRKL*RRRKK*KREKCANNNYFYGMKYTNSDSFRDNTWDLFIATIESNKLLWKEEDEIRCLGTHHGWEF*GQHKLI*FCLSFLLNEIFHFLACDFWFLLFNILYYYYYY*LVYNHRQ**Y***A	Pennate	Bacillariophyta	Bacillariophyceae	Bacillariales
MATOU-v2.18575240_5	18575240	LTGYTPEQVLGRNCRFLQGSGTDPKSVDIVRKAIQSGSDCTVCLLNYKADGTPFWNQFFVAALRDSDNCIVNYVGVQTEIEPDAGANALEDRVNAVMPLANKEDAEEDGKE*AN*KKIR*IVGSANNIX	Pennate	Bacillariophyta	Bacillariophyceae	Bacillariales
MATOU-v2.18619408_3	18619408	APAPAVATLQPQQQQVQGIGVPVAKRAKLEPGATKPTTLTANVAATGGVTSRLGFTAGHLQTGVQGGTALGHLQTGVQGGTALPIGGARSGILPAGVPGSMALSQQQQQGTFTQQQQQGTGVTLPVGRGIRLGGAGGVAPATARKVPGVGGMIWGGPQMMGMSDQAVAERRQRNREHAKRSRVRKKFMLESLQEQVASLQRENQRLRMLVQDNIPEHAQMIISECCTSSPLFGDTDSSNGQEGTEDENAEGKSKKTALVRSDFQLIDSLSAGQQNFVLSDPRLPDNPIVFATPGFYRLTGYTPEQVLGRNCRFLQGSGTDPKSVDIVRKAIQSGSDCTVCILTVCILNYKADGTPFWNQFFVAALRDSDNCIVNYVGVQTEIEPDAGANALEDRVNAVM…	Pennate	Bacillariophyta	Bacillariophyceae	Bacillariales
MATOU-v2.18625643_4	18625643	VLGRNCRFLQGTNTSKEKVDLIRKGVATGEDVSLTLVNYTADGTPFWNKLFIAALRDAQNNIVNFIGVIVKVASPEPGDPDFGKPLGVESESKEQSGGDADGTVKAIEGAVDAAVAAAPTVLSG*KLTIAKIFLERNFFT**KTNICRAINFYETPE	Pennate	Bacillariophyta	Bacillariophyceae	Bacillariales
MATOU-v2.18670392_3	18670392	FAISDPSLPDNPIVYVSQGFLELTGYSLNQVLGRNCRFLQGPGTDQSAVDIIRKGLQDGVDTSV	Centric	Bacillariophyta
MATOU-v2.18673867_1	18673867	ILARRTRLRKKFFFESLQKEVMELQKENAALRDIVRTEIDGEEGRELLEQCNAVRKLPREVLEACGENPDLDQEDFNLVTSIQQSQHSFVITDPSLQDNPIVFASDDFLTLTGYSREDVLGRNCRFLQGTNTSKEKVALIRKGLATGEDVSLTLVNYTADGTPFWNKLFIAALRDAQNNIVNFIGVIVKVASPEPGDPDFGKPLGTESESKEQSGGDADGTVKAIEGAVEAAVAAAPTVLSG*G*RIVKTFSSETDILFTSEKSILAVLLIFTNHLNNYTNQPSNPLRWSYYF*NIYHELMIHKNEMMRI****THTIFPRVKTANVLILQSEKIX	Pennate	Bacillariophyta	Bacillariophyceae	Bacillariales
MATOU-v2.18729154_4	18729154	HGDPKNLQKIGESYTPPSSNNPSDVVSVNKDNIIANNSNEANTVLDDPDFNFIKALQTAQQNFVVTDPSLPDNPIVYATQGFLNLTGYSLDQVLGRNCRFLQGPETDPSAVDKIRMAIERGIDMSVCLLNYRVDGSTFWNQFFIAALRDANGNVTNYVGVQCKVSDQYAAVVCKKQQEEQEDKSTPTTQS*NNADSQDKNQLIFLSHDDQHFSYFIF	Centric	Bacillariophyta
MATOU-v2.18756535_3	18756535	QIHALQEQLESMKKVIKEVLPDRADGIITKICGNKDKFTPLPTPSGFGPVKTLMEPDFRLMSALSGSQQNFAISDPTLPDNPIVYVSQGFLTLTGYTLDQVLGRNCRFLQGPGTDQSAVEVIRRGIKEGVDTSVCLLNYKADGTPFWNQFFVA	Pennate
MATOU-v2.18759807_2	18759807	YLILSLGTL*YYGDLKIDELFHDCYFGDDNLAQDAIPIISSTPRIPTPTPLEFNNAVPVASPDVVQSTAPRATTSTNLNSKRSFADAMKSKTSSSIYNNNSNHTKPSMNSGKLTDQQRLERRIRNREHAH**RRNCLTELRKCCKNWNYLMELLIVMKNALCTSHYQCQVALVQ*RH**NLYKPLPMPSGFGPVKALIEPDFRLMHSLSNSQQNFAISDPSLPDNPIIYVSQGFLDLTEYRLDQVLGRNCRFLQGPGTDQAAVEVIRKGMAEGIDTSVCLLNYKADGTPFWNQFFIAALRDANNKIVNYVGVQCEVSKAIVESHLEQIQCEDEGS*LVLISNKR*LQINSLAQNRFFYLPYEVDEMK*ISAMYIHVKLD*SSLFYSFYLKX	Centric
MATOU-v2.18793649_4	18793649	E*QQRGSHAVLRTRSECAGR*RKPMAHTCTGVDTSVCLLNYKADGTPFWNQFFVAPLRDAEDRVVNFVGVQCEVSKAVVEKHITEG*TEGSILNA	Centric	Bacillariophyta	Coscinodiscophyceae	Thalassiosirales
MATOU-v2.18854691_5	18854691	SDCTVCILNYKADGTPFWNQFFVAALRDSDNCIVNYVGVQTEIEADAGANALEDRVNAVMPLANKDDDDNEGK*RNLCWA*MISCYQIASRSCSLLKVFDPREKWSTHQYAKNFX	Pennate	Bacillariophyta	Bacillariophyceae	Bacillariales
MATOU-v2.18865021_3	18865021	RKLPGVGGMIWGGPQMMGMSDQAVAERRQRNREHAKRSRVRKKFMLESLQEQVASLQRENQTLRMLVQDNIPEHAQMIISECCTSSPLFGDSNSQQGSEDETADGKNKTTALVRSDFQLIDSLSAGQQNFVLSDPRLPDNPIVFATPGFYRLTGYTPEQVLGRNCRFLQGSGTDPKSVDIVRKAIQSGSDCTVCILNYKADGTPFWNQFFVAALRDSDNCIVNYVGVQTEIEPDAGANALEDRVNAVMPLANKDDDEDDKV*KKLTKCHYVVVFMRFDKLKYLDEKHDVQFKL*FLRIVKVSTITVLFYLKRLLIMLK*F*TX	Pennate	Bacillariophyta	Bacillariophyceae	Bacillariales
MATOU-v2.18883737_6	18883737	QLLEQFNAARKLPREVLEACGENPDLDQEDFNLVTSIQQSQHSFVITDPSLQDNPIVFASDDFLTLTGYSRDDVLGRNCRFLQGNNTSKEKVDLIRKGVATGEDVSVTLVNYTADGTPFWNKLFIAALRDAQNNIVNFIGVIVKVASPEPGDPDFGKPLVTETENSTRSEGDADGTVKAIEGAVDAAVAAAPTVLSG*RATFAISHSIYEEGI*LYSVLSDCIINLAIGNFSANPNKIIYP*FERKIFX	Pennate	Bacillariophyta	Bacillariophyceae	Bacillariales
MATOU-v2.18954252_3	18954252	RKKFFFESLQKEVTDLQRENTVLKEIVKAKLDAEVADAVLADCHVGDLPSVVVENSEEDAIDLDQQDFNLVCSLKKSQQCFVITDPSLX	Centric	Bacillariophyta	Coscinodiscophyceae	Coscinodiscales
MATOU-v2.19065831_2	19065831	LDLTGYQLDRVLGRNCRFLQGPGTDQSAVDVIRKGISEGIDTSVCLLNYKADGTPFWNQFFVAALRDAENNVVNYVGVQCEVSKAVVEKHMGVDKKK*CGMDPRQNANTHA*RSLNSSIIRRLIDPSASMAIR*YFFNDTE*YV	Pennate	Bacillariophyta
MATOU-v2.19068535_4	19068535	FIKALQTAQQNFVVTDPSLPDNPIVYATQGFLNLTGYTLDQVLGRNCRFLQGPETDPKAVEKIRN	Centric	Bacillariophyta	Coscinodiscophyceae
MATOU-v2.19084713_6	19084713	LLEQCNAARKLPREVLEACGENPDLDQEDFNLVTSIQQSQHSFVITDPSLQDNPIVFASDDFLTLTGYSRDDVLGRNCRFLQGTNTSX	Pennate	Bacillariophyta	Bacillariophyceae	Bacillariales
MATOU-v2.19108089_2	19108089	YRLTGYTPEQVLGRNCRFLQGSGTDPKSVDIVRKAIQSGSDCTVCILNYKADGTPFWNQFFVAALRDSDNCIVNYVGVQTEIEPDAGANALEDRVNAVMPLANKDDDDQEGK*MNF*SKFEHVDCTKFYEPKLSSVVTRHGIQRHKTERCRIYFPGLLSTI*LDL*S*KLNVVPSAYRENRR	Pennate	Bacillariophyta	Bacillariophyceae	Bacillariales
MATOU-v2.19172646_3	19172646	RDQVLGRNCRFLQGERTDRKAVEVIRTAVANGTDASVCLLNYKADGTPFWNQLFVAALRDSDNCIVNYVGVQTRIDPHAGTNALEEKVNEACPIVFCDQLKTEPKDDSDEPKTDSVILEKDSNE*ASTX	Centric	Bacillariophyta
MATOU-v2.19388600_5	19388600	LSGSQQNFAISDPSLPDNPIVYVSQGFLELTGYTLNYVLGRNCRFLQGADTDQGAIDIIRKGIKDGVDTSVCLLNYKADGTPFWNQFFVGALRDAENNVVNYVGVQCEVSKAVVDKQMAELKNRISG**NTHIHTQLAHEI*NYSLIIFEWX	Centric
MATOU-v2.19388601_6	19388601	MEPQAQVQVQVQQQQQQNSLQQQEQQNSLTLKRKADDIKPTPVLSNVTSSSEINTAPTKKAKPLTDQQRNERRSRNRKHAEKSRLRKKFLLQNLQEQINSLQSELKALQDVIRKECPDKAEQLLESVSGPKGKFTPLSX	Centric	Bacillariophyta
MATOU-v2.19393228_1	19393228	VIAANNTEANKVLDDPDYNFIKALQTAQQNFVVTDPSLPDNPIVYATQGFLNLTGYTLDQVLGRNCRFLQGPETDPKAVDKIRNAIEAGVDMSVCLLNYRADGTTFWNQFFIAALRDASGNVTNYVGVQCKVSDQYAASVCKRQNDDEEDEEEDE*GKESHNFFLLV*LYQHLIGH*TNFKFVYSDSAFRVL*YNARFILREGISG*EK**Q*GLIKNFFAN*KKKKKKKKKKKKKKKKKRIVYFFVKNKFR*LX	Centric	Bacillariophyta
MATOU-v2.19407177_4	19407177	MGATGEDVSLTLVNYTADGTPFWNKLFIAALRDAQNNIVNFIGVIVKVASPEPGDPDFGKPLSVENEKKEQSEGDADTWGNRKGD*RCCRCCGCCCSNRPQQLKTARKDSFGKNSFQLSWIVVIVAPFVYDERSTYYAYNFYEQPKKLFESIWSYYLSKIHDLIVYKNENNKNLSGG	Pennate	Bacillariophyta	Bacillariophyceae	Bacillariales
MATOU-v2.19411114_2	19411114	HGILNYKADGTPFWNQFFVAALRDADNCIVNYVGVQCEVETEAGSSALEDKVNSVLPLQNKDGGEANKVAS*ASSSFILRNTFFGCFQNDTSFLRTDTTSSLITSETTPISSISIIIL*SIENGIFHFLCV*PSPHKMIQKDPERGRGKANQTTRIYLSSLGETFSTVEYDKSS*LRS*IL*K*QYRETRNYNIHIPFFLAFFLHSRIKTRKKREK	Pennate	Bacillariophyta	Fragilariophyceae
MATOU-v2.19414416_1	19414416	GKRVRTLMAPDYRLMSALSGSQQNFAISDPSLPDNPIVYVSQGFLDLTGYSLEQVLGRNCRFLQGPGTDQAAVEVIRRGISEGTDTSVCLLNYKADGTPFWNQFFVAGLRDAEDNVVNYGTRRTMWSTTSAFSAR*AGPWLRSTYRRERHRRPH*LEESRERRGTE*LREELCGSINPCFSNEVRISMHNMSIIMNIYYIVX	Centric	Bacillariophyta	Coscinodiscophyceae
MATOU-v2.19414905_3	19414905	MGEQQKIERRERNREHAKRSRLRKKFLLESLQEQIHYLQSDIEKLTLLIRREMPDKAEELLRSVQLSTGDANKNKSLAGANMYKPLPMPSGFGPVKTLIEPDFRLMFSLSNSQQNFAISDPSLPDNPIIYVSQGFLDLTGYTLDQVLGRNCRFLQGPGTDQAAVEVIRKGMKEGVDTSVCLLNYKADGTPFWNQFFVAALRDANNQIVNYVGVQCEVSKAVVDSHMEQAVNDGA*INAYPYFDVIFIDFIKFEIFQFPCVMWVLENNNHAILNKPDTNKNYYL*INLKFLLYR	Centric
MATOU-v2.19428821_4	19428821	QGGAQSGLQMGGGSGGILSGGVHATPAAVTLAQQQGPYGQQQQGSGVALPVGHGIRLGGAGGVAPATARKVPGVGGMILGGPQMMGMSDQAVAERRQRNREHAKRSRVRKKFMLESLQEQVSSLQRENQRLRLLVQDNIPEHAQMIISECCTSSPLFGDADLNSSQTSSGAGDDDDGAAKNKTTALVRSDFQLIDSLSSGQQNFVLSDPRLPDNPIVFATPGFYKLTGYTPEQVLGRNCRFLQGSGTDPKSVDIVRKAIQSGSDCTVCLLNYKADGTPFWNQFFVAALRDSDNCIVNYVGVQTEIEPDAGANALEDRVNAVMPLANKEDTEEDGKD*A*LKYKTIRLIVGSANSIRRNL*NYETGL*FDFLFKRMRRSMITLLENNVSLL	Pennate	Bacillariophyta	Bacillariophyceae	Bacillariales
MATOU-v2.19429413_4	19429413	TMPQPPQAQFPYMTGQPVTNPATTHTTSSFSSATSTAKLTEQQKLERRERNREHAKRSRLRKKFLLESLQEQIHGLQSDIEKLTSVIRKEMPQKAEALLRDMQLCTDVVTSSNGSSTGGPGNMYKPINMPSGFGPVKTLIEPDFRLMFSLSNSQQNFAISDPSLPDNPIIYVSQGFLDLTGYTLDQVLGRNCRFLQGPGTDQAAVEVIRKGMKEGVDTSVCLLNYKADGTPFWNQFFVAALKDANNNIVNYVGVQCEVSKAVVESHLEHLNDEKSKTVTTVPSSSSSGGNTAVPSG*GVFFYVL	Centric	Bacillariophyta
MATOU-v2.19435082_4	19435082	LKELARKKLPPEVSKKLLSECKAMEKLPSAVQEAVGESATDMNSQDFNLVQSIQRSQQCFVITDPSLQDNPIVYASDDFLSLTGYQRADVLGRNCRFLQGTETSPQKVEKVRKAVSLGEDTTVTMINYTADGTAFWNKLFIAALRDAQNNIVNYIGVIVKVASPDPDDQETGKRLPGEQPSANVENAHDTKLSATFEVRTNNALQPSEDPVKDPLSTATLH*SLLGLKYLILS*ISIDYPRLQMKRK*TEQNNILMMHLKTMNILINKGVI*FLVKMQTYAISSNFP*GQYFLSKK	Pennate	Bacillariophyta	Fragilariophyceae	Thalassionemales
MATOU-v2.19440334_2	19440334	HGAAARRMRNREHAKRSRVRKKFLVESLQRKVKGLQDENCSLRLLVQKHIPQDAIKIIDDCCSKNILFRTADGNSNDEDKKNGVKGKVTPLLRSDFSLIESLKSGQRNFVLSDPRLPDNPLVYASPGFYELTGYTRDQVLGRNCRFLQGEGTDRNAVEVIRTAVANGTDASVCLLNYKADGTPFWNQLFVAALRDSDNCIVNYVGIQTRIDPHAGTNALEEKVNEACPIVFCDQPKSEPKDDSEEPEIDLKNLDKKREK*VSTFISKWYYEC**P*TNVFN*VRYGLLTASKQ*ETX	Centric	Bacillariophyta	Coscinodiscophyceae	Thalassiosirales
MATOU-v2.19446223_1	19446223	NGSGSNSSNNNDNALIAMNAKEGNKVLDDPDFSFIKALQTAQQNFVVTDPSLPDNPIVYATQGFLNLTGYTLDQVLGRNCRFLQGPETDPKAVEKIRRSIEDGSDMSVCLLNYRVDGTTFWNQFFIAALRDAAGNITNYVGVQCKVSDQYAANVCKKQEEEDARAADEEKVGDIAATTATATATATATATAVTTNTADASVAADPSTGTSASVADDTSTAVSGGGTVVSSATTVNTGAATGATAATTSDVSAVDVKMEDNVNAPPSVTANGATTTTTTPTVVAPTNVAIPSTAPTVKEEGGNS*KQMIGGEIK*DGVRLINASNLGCIV*FVNKKR*NLSPPDLLLLLSLLFFLALKYISVRER*KSW	Centric	Bacillariophyta
MATOU-v2.19452647_3	19452647	FGIK*LCPLY*TTICFHYLAFHPHLLMESQQLLRRVMTSLQQIITAAI*FLRYKINCSIQRVTKISIC*RNIY*MMVH*RLLPHLE*IWKVM*AYRRQRRLNLLLIVVICINKQHQKRKKVFKLR*QT*YLNI*KEAICRSISNVNKSKRRSNNNHRRHYYILDQRC*LQVPFFHKRTRLLLKQRLQ*QPMQMQLLLFIINIQQQLRTLLCQQQDKNVTLTRLCQVLRIVLVNAQRVKLKLINVVNVIVF*LRKKFFFESLQKEVMDLQRENYALKEIVKKNFEAVEGKNLLSECKVGDLPSILSSGDASSYGENNDMDDTDLTFISSVKKSQQCFISSVKKSQQCFVITDPSLHDNPIVFASEDFFTLTGYTREEVLGRNCRFLQGMDTCPTKLEQIR…	Centric
MATOU-v2.19452647_3	19452647	FGIK*LCPLY*TTICFHYLAFHPHLLMESQQLLRRVMTSLQQIITAAI*FLRYKINCSIQRVTKISIC*RNIY*MMVH*RLLPHLE*IWKVM*AYRRQRRLNLLLIVVICINKQHQKRKKVFKLR*QT*YLNI*KEAICRSISNVNKSKRRSNNNHRRHYYILDQRC*LQVPFFHKRTRLLLKQRLQ*QPMQMQLLLFIINIQQQLRTLLCQQQDKNVTLTRLCQVLRIVLVNAQRVKLKLINVVNVIVF*LRKKFFFESLQKEVMDLQRENYALKEIVKKNFEAVEGKNLLSECKVGDLPSILSSGDASSYGENNDMDDTDLTFISSVKKSQQCFISSVKKSQQCFVITDPSLHDNPIVFASEDFFTLTGYTREEVLGRNCRFLQGMDTCPTKLEQIR…	Centric
MATOU-v2.19465165_2	19465165	HGENIALKEIVRSRIAANEAKPILDHCKAMEEIPSVVLEQCGDPSLLDRQDFNLYRAIKRSQQCFVITDPSLQDNPIVYASDDFLTVTGYKRADVLGRNCRFLQGPETSQSKVAMIRKGVENGNDVSVTFVNYTADGVAFWNKLFIAALRDAQNNIVNFIGVIVKVAGPEPNDPEAGKVLPGENSTGVAGNGQENISGDGTVDADAAVMAIEGAVTAAVAAAPKGVVKKTNT*SEL*SLYLPIFYCCCFISSKRCILKTTHVFLIYGEAS*TILKREIPRRTKGTNHNCSFIPN*DKYH*QQAX	Centric	Bacillariophyta	Coscinodiscophyceae	Chaetocerotales
MATOU-v2.19474205_2	19474205	GSGPCHRYSP*ESTACHATTSESRI*GSYCSQTSSAKACGCFHHFHSSQQTPQDDCSPSVYDGKSLRLLFRREQYHVYGNGCNGCTD*QGRIEKTQAQVDRRRERNRILARRTRLRKKFFFESLQKDVADLQRENAALKSIIRSCLKPDDAKTILNSCDAQQKMPSAVQSQTVQPHHFMKENQNNLTCGGGSSVRKLDREDFSLIQSIQNSQQCFIITDPSLHDNPIVYASDDFLKLTGYSQEEVLGRNCRFLQGTETCQNKVAQIRKAVAAGEDVSVTIANYTSEGNPFWNSLFIAALRDADNNIVNFIGVIVKVLKPEPGDSEYGKVLK*VCDVSQEEHPQLIPLRASKSLFVPVGERKEKINYATSEYIVPPAKX	Centric	Bacillariophyta	Coscinodiscophyceae	Thalassiosirales
MATOU-v2.19478160_1	19478160	GYSLNQVLGRNCRFLQGPGTDQSAVDIIRKGLQDGVDTSVCLLNYKADGTPFWNQFFVAALRDAENNVVNFVGVQCEVSKAVVDKQIAEQKGQNDPSSS*NKSVYFCDSMVLWSEKCK*LNANLIHFSL*IDYI	Centric
MATOU-v2.19484739_1	19484739	FASPGFYELTGYTRYQVLGRNCRFLQGERTDRKAVEVIRTAVANGTDASVCLLNYKADGTPFWNQLFIAALRDSDNCIVNYVGVQTRIDPNAGTNALEEKVNQACPIVFCDQLKTEPKDDSEELKTDSIILEKDRNE*ASTFISNALRLQRTLDLT*FLIPVVVFYSX	Centric	Bacillariophyta	Coscinodiscophyceae	Thalassiosirales
MATOU-v2.19485576_6	19485576	DDVLGRNCRFLQGKNTSKEKVDIIRKGVANGEDVSVTLVNYTADGTPFWNKLFIAALRDAQNNIVNFIGVIVKVASPEPGDPDFGKPLSTENENKEQPENRVDADGAVKAIEGIVDAAVAAAPTVPLSA*SNTASTETLQ*Q*SCFYSQ*AI*SHSPYLFFLEIQMKSAVSLHYLYYDLLYKLKIMLFNR	Pennate	Bacillariophyta	Bacillariophyceae	Bacillariales
MATOU-v2.19488231_6	19488231	VRSDFQLIDSLSAGQQNFVLSDPRLPDNPIVFATPGFYRLTGYTPEQVLGRNCRFLQGSGTDPKSVDIIRKAIQSGSDCTVCILNYKADGTPFWNQFFVAALRDSDNCIVNYVGVQTEIEPDAGANALEDRVNAVMPLANKDDDDEDGK*KIF*RCITCVC**DL*NFFHDNVIL*YSRSTYS*II*WSSTS*ISSRILSVSHLWQN*LAT	Pennate	Bacillariophyta	Bacillariophyceae	Bacillariales
MATOU-v2.19512780_3	19512780	MGPMLVMNNGGQGGAVAGKKRNGSGVGNIATTSVATGGRERKPPEQGKKERRERNREHAKRSRIRKKFLLESLQQSVTLLKEENGKLRDSIRQHLGDAQANDLLKKENLADVAANAKAGX	Centric	Bacillariophyta	Coscinodiscophyceae	Chaetocerotales
MATOU-v2.19538763_6	19538763	LTGYTLDQVLGRNCRFLQGPGTDQAAVEVIRKGVAEGVDTSVCLLNYKADGTPFWNQFFIAALRDAQNNVVNFVGVQCEVSKAVVEKHISEGKTPMSTLQGPK*WGYACFDSRVNKACQKKCLX	Centric	Bacillariophyta	Coscinodiscophyceae	Thalassiosirales
MATOU-v2.19541693_5	19541693	LTGYTPEQVLGRNCRFLQGSGTDPKSVDIIRKAIQSGSDCTVCILNYKADGTPFWNQFFVAALRDSDNCIVNYVGVQTEIEPDAGAEIEPDAGANALEDRVNAVMPLANKDDDDEDGK*RNLKDSRSLPKVLSKS*YCSNSSLIP*QLX	Pennate	Bacillariophyta	Bacillariophyceae	Bacillariales
MATOU-v2.19614129_4	19614129	NGQSEQKPLVSTSSDSITTSSVKKESTSTSKSLTDQQKIERRERNRKHAKRSRLRKKFLLESLQEQINGLQSEIES	Centric
MATOU-v2.26414172_6	26414172	AHLLCRKSKRLVERAIITLSSEGDRYTRRLSHCNKLCSTLQLSF*HFDVNGTQENVT*SSKADFCLGTRQSGG*FRFERDLC*LLHQ*IRRSNENAYTSSMANYGGGAAAVAIAQNPPPQEHLPTGGIRTAFHTTAAAAAAPANQGVQHYQQHATPLAKRPKIESQPAMPRPGGLTSRLGVPMPLIQGQNGVQAGTSQLSANPSMNGISLPVGVGIRLGGAGSVDPTTARNAATRVGGPGFNMWGGAQATGMSDQAIAERRQRNREHAKRSRVRKKFMLESLQEQVASLQLENQKLRILVQDNIPEYAQKIISECCTTSTLFGDGASETDGPIKRKGSTSLVGADFQLMESLSSGQQNFVLSDPRLPDNPIVFATPGFYKLTGYTQEQVLGRNCRFLQG…	Pennate
MATOU-v2.26483672_4	26483672	FTPDGDTVFLSEEQEILPSGEKHVTNMASKVNAGGLVPVQKGGGLYTTQLHDREKPAVPMGQVTSGMKETSSVPYRKAPQERHHLQYAMPKKKSSRSADRKMSEQQKVERRERNREHAKRSRIRKKFLLESLQQSVALLKEENEKLRGSIVKHLGSENAEKLLEKAAANDGAPDLIANSQGAANKVLDDPDFSFIKALQTAQQNFVVTDPSLPDNPIVYASQGFLNLTGYSLDQILGRNCRFLQGPETDPKAVERIRHAIEQGNDLSVCLLNYRVDGTTFWNQFFIAALRDASGNITNFVGVQCKVSDQYAASVTKEQEKEDEENPAMAPEQ*LFFLLSIDSDFFSPHNTRIQHTHTHKHECTGG*GIEKVQNKERRSRVERERDGVGRHRPAEPASVN…	Pennate	Bacillariophyta
MATOU-v2.26708127_2	26708127	VIEACGEHGGDIDQQDFNLVRSIQQSQHSFIITDPNLQDNPIVFASDDFLSLTGYSREEVLGRNCRFLQGTETSQAKVEEIRKGIAIGDDVSVTLVNYTADGTPFWNKLFIAALRDAQNNIVNFIGVIAKVASPEPSDPEHGRRLPGENNLEDAKIMDSQKLDSSAAAIVADGTVKAIEGVVDAAVAAAPSVVRG*TS*NWEVVIMIWPAQPNAGQILHVGRQQIDQTPHPKFCTGLSRGGL*IEEPY*VESARKIQNKRX	Pennate
MATOU-v2.26794580_4	26794580	PFWNQFFIAALRDADNCIVNYVGVQTEVQPETAISALEDRVNAVMPLQNKDKDDEIDAEIDD*VMV*QTAHPGGFLRPNCLLAEH	Pennate
MATOU-v2.26805442_3	26805442	CRFLQGPETDPKAVERIRKAIEVGNDMSVCLLNYRVDGTTFWNQFFIAALRDTAGNVTNFVGVQCKV	Pennate	Bacillariophyta
MATOU-v2.27333304_3	27333304	ASQGFLNLTGYSLDQILGRNCRFLQGPETDPKHVERIRKAIEQGNDMSVCLLNYRVDGTTFWNQFFIAALRDASGNVTNFVGVQCKVSDQYAATVTKQQEEEEGM*EVSFERMSPLRSS	Pennate
MATOU-v2.27366681_1	27366681	VPLIADGKFNIGRGNITLAPPVSATTSIPAQEPKRRKTESGIAVVADGAPPDTSSGNAEGSSPKRGKKNQAQAERRRERNRILARRTRLRKKFFFESLQKELTDLQAENEMLKELVKLELDPEKSKEILDECDAMEKLPPGVMEVLQEENNMASQDFSLVQSIRKSQHSFVITDPSLEDNPIVFVSDDFLQITGYKREDVLGRNCRFLQGEETSKEKAAEIRKSLEAGDDVSQTIVNYTADGTPFWNKLFIAALRDSENNIVNYIGVTVQVVGPESGDPEHGKVLKTSKTGGQAGGEASAESTLQAPMSGGLEVATSS*RRNTK*RYAKYKYYCSTILWX	Pennate
MATOU-v2.27414338_4	27414338	AVGSRGNPATLNLDDIFGDVMFTPDGDTVFLSEQKEEELLESGEKNGVAMAAAKPDSHGRFRPVPQGGGLYTTQLTDQGKPALTMGAAAAGVRATEAVPYKRAPQAQNHLQYAAPKKKSSRSDRKMSEQQKVERRERNREHAKRSRIRKKFLLESLQQSTNLLKDENQKLKDALKTHLGAAKANQLLAKQDTSLDGLLANSQGIANKVLDDPDFSFIKALQTAQQNFVVTDPSLPDNPIVYASQGFLNLTGYSLDQILGRNCRFLQGPETDPKAVERIRKAIEQGNDMSVCLLNYRVDGTTFWNQFFIAALRDANGNVTNFVGVQCKVSDQYAAAVTKQQEEEEE*IYFDYTGPLSYV*QWPISDGLQYTFIH*ISICYET	Pennate
MATOU-v2.29333479_3	29333479	QKENAALRDIVRNEIEGEESRQLLEQCNAARKLPREVLEACGENPDLDQEDFNLVTSVQQSQHSFVITDPSLQDNPIVFASDDFLTLTGYSREDVLGRNCRFLQGTNTSKEKVDLIRKGLATGEDVSVTLVNYTADGTPFWNKLFIAALRDAQNNIVNFIGVIVKVASPEPGDPDFGKPLSPEAEGKQAGNGDADGTVKAIEGAVTAAVAAAPSVMSG*YPFR*LQMGLSFFIMGRLVLFLSGWRTPTRTAKQVVRFHDX	Pennate	Bacillariophyta	Bacillariophyceae	Bacillariales
MATOU-v2.29338133_6	29338133	MGDNPIVYASQGFLNLTGYSLDQILGRNCRFLQGPETDPKAVERIRKAIEQGHDMSVCLLNYRVDGTTFWNQFFIAALRDAAGNVTNFVGVQCKVSDQYAATVTKQQEEEDAEE*AASNLDYFSGRR*KNDSKILNDRVRKSKTSHRELILQKKRLLKENKKSKSGVDILVLX	Pennate
MATOU-v2.29552222_1	29552222	QKDFNLVRNVQRSQQCFIISDPSLQDNPIVYASDDFLELTGYKREEVLGRNCRFLQGTETCPQKIQEIKKAIASGEDVSVTMINYTADGTAFWNKLFIAALRDAQSNIVNFIGVVVKVLSPDPDDPEANKRLPGQEASADEDDEHGLK	Centric	Bacillariophyta	Fragilariophyceae
MATOU-v2.32510377_2	32510377	EGLQKEVIDLQRENLVLKDLVRKQLSPDVSKKLLEESKAMEQLPSAVQEAVGESATDMNSQDFNLVRSIQQSQQCFIITDPSLQDNPIVYASDDFLALTGYERGEVLGRNCRFLQGTETSPQKVEQVRKAISLGEDTTVTFINYTKDGTAFWNKLFIAALRDAQNNIVNFIGVIAKVASPDQGDAEAGKRLPGEQPTLSNGEENSVADDVVDAKSREDAA*ESGPAQLLNFDSLGEPDLQYVSFMRYKSALQTNGFCSLNKV*VRTMX	Pennate	Bacillariophyta	Fragilariophyceae	Thalassionemales
MATOU-v2.32626007_3	32626007	GSGEGEKVATAASKVGDDGKYKPVAQGGGLYTTALMDQGQQATPMGTAAGSVKATAAVPFKRAPQKTNHLQYAAPKKKKDPRSSDRKMSEQQKVERRERNREHAKRSRIRKKFLLESLQQSVALLKEENEKLRNSIRSHLGDERASELLNSSKDTSVDGLLANSQSIANKVLDDPDFSFIKALQTAQQNFVVTDPGLPDNPIVYASQGFLNLTGYSLDQILGRNCRFLQGPETDPKAVERIRKAIEQGHDMSVCLLNYRVDGTTFWNQFFIAALRDAAGCVTNFVGVQCKVSDQYAATVTKQQEEEEAAAAAAASED*RLRPGCSLSRYVSCEGS*AQDCDDNGDV*ITSFLANGI*GYRVLVDDYFAQDKIX	Pennate	Bacillariophyta
MATOU-v2.32742204_1	32742204	IKALQTAQQNFVVTDPSLPDNPIVYATQGFLNLTGYTLDQVLGRNCRFLQGPDTDPKAVEKIRRSIEEGSDMSVCLLNYRVDGTTFWNQFFIAALRDASGNITNYVGVQCKVSDQYAANVCKKQEEEDNNSNAGETEESG*FKSLILISTAFVEC**ATVQC*ITVIHF*QX	Pennate
MATOU-v2.32957758_6	32957758	SIRHHVGDEQAEKLLEQKMDGTNGDMRLTTSSQGAANKVLDDPDFSFIKALQTAQQNFVVTDPSLPDNPIVYA	Pennate	Bacillariophyta	Bacillariophyceae	Bacillariales
MATOU-v2.33024536_4	33024536	TWERKAGSKSSDRKMSEQQKVERRERNREHAKRSRIRKKFLLESLQQSVALLKDENEKLRSAIKSNLPASEADELLNKKFGSGDTGLIANSSMDANKVLDDPDFSFIKALQTAQQNFVVTDPSLPDNPIVYATQGFLNLTGYTLDQVLGRNCRFLQGPETDPKAVEKIRRSIEEGSDMSVCLLNYRVDGTTFWNQFFIAALRDASGNITNYVGVQCKVSDQYAANVCKRQEEEENASE*TLREKQSVYANQCLLYLNRLMHTTKLQLEFVFFLGTIEVLCRTDIIYDG*F	Pennate	Bacillariophyta	Fragilariophyceae
MATOU-v2.34744403_5	34744403	QVVLEHCGDPMALSRQDFNLIASIKQSQESFVITDPSLQDNPIVYASDGFLELTGYAREQVLGRNCRFLQGTDTDSKKLSEIRKGLISGDDVSVVIRNYCADGTPFWX	Centric	Bacillariophyta	Coscinodiscophyceae	Chaetocerotales
MATOU-v2.34744404_1	34744404	TRLRKKFFFESLQKEVTDLQKENLVLREIVKSRIQKDKADAILKDCKANEELPQVVLEHCGDPMALSRQDFX	Centric	Bacillariophyta	Coscinodiscophyceae	Chaetocerotales
MATOU-v2.34754501_3	34754501	PDFRLMSALSGSQQNFAISDPSLPDNPIVYVSQGFLELTGYTLDQVLGRNCRFLQGPGTDQSAVDIIRKGVREGVDTSVCLLNYKADGTPFWNQFFVAALRDAENNVVNFVGVQCEVSKAVVEKQMAQKEAAAEKAQEEG*KCMTFFNKLFVHMIT*HRINNRVSYSHX	Centric
MATOU-v2.36158855_3	36158855	NTEESERLLNEQSLQERGLIASNAQEANKVLDDPDFSFIKALQTAQQNFVVTDPSLPDNPIVYATQGFLNLT	Centric	Bacillariophyta	Coscinodiscophyceae	Rhizosoleniales
MATOU-v2.40715801_5	40715801	YSLNEVLGRNCRFLQGPGTDQSAVDVIRKGINEGIDTSVCLLNYKADGTPFWNQFFVAALRDAENNVVNYVGVX	Pennate
MATOU-v2.41053590_6	41053590	YRVDGTTFWNQFFIAALRDAGGNITNYVGVQCKVSDQYAASVCKKQEEADAAATAAVTGAANFKQES*L*YHGDGTIGCAKQNNMTNFAR*SHHDGQLKNQS*PVRMFHLILYGMFLKEGFN*X	Centric	Bacillariophyta	Coscinodiscophyceae	Thalassiosirales
MATOU-v2.41196906_4	41196906	RADGTPFWNKLFIAALRDAQNNIVNYIGVSVKVAGDHESVSPRSSEPNGMNGQHIGGMVNDDAPNVDIDATVMAIEGAVDAAVAAAPNGLKKSTNQLP*SIYTLPIYQHTNILF*IKST*III	Centric	Bacillariophyta	Coscinodiscophyceae	Chaetocerotales
MATOU-v2.41238957_5	41238957	IQQKIPQHAQQIIDECCIKSPLFGDDSTGNDGGKNEIELTKSDYSLIENLTSGQQNFVLSDPRLPDNPIVFASEGFYQLTGYTREQVLGRNCRFLQGPATDPKAVDVIRTAVANGTDASTCILNYKADGTPFWNQFFVAALRDSENCIVNYVGVQCVVDPEAGTTVLEDKVDSVLPX	Centric	Bacillariophyta	Coscinodiscophyceae	Chaetocerotales
MATOU-v2.42226967_2	42226967	EHAQMIISECCTSSPLFGDTDLNGPQTSGAGEDEDGPAKNKTTALVRSDFQLIDSLSSGQQNFVLSDPRLPDNPIVFATPGFYKLTGYTPEQVLGRNCRFLQGSGTDPKSVDIVRKAIQSGSDCTVCLLNYKADGTPFWNQFFVAALRDSDNCIVNYVGVQTEIEPDAGANALEDRVNAVMPLANKEDAEEDGKE*AN*KQHVMNSSRKRK*KLRTEKFIYNNDKSLLFDLPFRRIQRKIDDQVIR	Pennate	Bacillariophyta	Bacillariophyceae	Bacillariales
MATOU-v2.42551651_1	42551651	DMGRKNLLEGEDVNTCLLNYTADGTPFWNQLFVAALRDTQNNIVNFIGVIVKVAGPPPDDVEYGKHETAENDSKPDLDELREDLVEAVSDVKGNTDADHVLNP*SMYHFPFSKTCKKTIFFSLAVVFS**NCRRIFLTYSIFPLTYC*VSFLVS**TSSHIETS	Centric
MATOU-v2.42611443_5	42611443	LPDNPIVYVSQGFLDLTEYTLDQVLGRNCRFLQGPGTDQSAVDVIRKGIREGIDTSVCLLNYKADGTPFWNQFFIAALX	Centric
MATOU-v2.43008185_2	43008185	HGGTAFWNKLFLAALRDAQNNIVNYIGVIVKVATPDSGDPEAGKRLPGESAPNNREGHESDVGKQTGNMPKDGECDVDQELDDDF*ECKNELVIKKSSFLFLHHTREHATNLLQMNKMNKMRG*NSLIK*NKPKVIAT	Pennate
MATOU-v2.43156944_2	43156944	VT*AI*RWIALFRCNHCE*PSCSRSFYNSGGRQCSNICCSWDDAASASGFSTSPPSKWRSYATSTCRFKLSTVAHGHSATNAFFPWGCGASAHYCGRDRNNTTKCQEETCGRNCSTFGVDGTAPPLGNGQIVTGRGRQKSQAQIDRRRERNRILARRTRLRKKFFFEGLQKEVIDLQRENLVLKDLVRKQLPPDVSKKLLEEAKAMEQLPSAVQEAVGESAADMNSQDFNLVRSIQQSQQCFIITDPSLQDNPIVYASDDFLSLTGYERGEVLGRNCRFLQGTETSPQKVEQVRKAISLGEDTTVTFINYTKDGTAFWNKLFIAALRDAQNNIVNFIGVIAKVASPDQGDAEAGKRLPGEQPTPSNGEESTVASNLVEAKGREDEA*VAGSAQLLNFDS…	Pennate	Bacillariophyta	Fragilariophyceae	Thalassionemales
MATOU-v2.43377270_2	43377270	QQLTWLLRGLQSPSTLRLIHFFVYI*YPYRRQIELSFGGIGNKSYLFAKVETPPRTKFWKPLASSQPKKTAADNGDPRTTMSGFQQPLFAPAQGGKSGEPDLDLNELFADYFVNELEDPLRTFNHSVTAAMFPGDAVATQQQLQQQVGISNGTSLPTGRGIQTAFHNTNNYALAAAADPGMAATAAAVAGMGVPGMAPPSGATAAYMQEPAPKKSKMEQSLASGGGVTSGRLGYPMGQQQQQQAAMGAQQSQQMQHHQHSQQQVALPVGVGIRIGGSGGVATGTGGMNMTHTQWGASGGGGGGGGGVGVGVGVGLSHVQHGAQQTAAGAVGMGAYAGLMGASTAFGGPMSEQAVAERRQRNREHAKRSRVRKKFMLESLQQDVRNLQKENEVLRQIVQA…	Centric	Bacillariophyta	Mediophyceae	Cymatosirales
MATOU-v2.43377271_2	43377271	RYRSAAAIPADLEVCVLDCASSN*SGCCSGLQSPPDLRLIHFFVYI*YPYRRRTELSFG**EIVSFRES*KPPTHKVPETLASSQPKKTAADNGDPRTTMSGFQQPLFAPAQGGKSGEPDLDLNELFADYFVNELEDPLRTFNHSVTAAMFPGDAVATQQQLQQQVGISNGTSLPTGRGIQTAFHNTNNYALAAAADPGMAATAAAVAGMGVPGMAPPSGATAAYMQEPAPKKSKMEQSLASGGGVTSGRLGYPMGQQQQQQAAMGAQQSQQMQHHQHSQQQVALPVGVGIRIGGSGGVATGTGGMNMTHTQWGASGGGGGGGGVGLSHVQHGAQQTAAGAMGMGAYAGLMGASTAFGGPMSEQAVAERRQRNREHAKRSRVRKKFMLESLQQDVRNLQ…	Centric	Bacillariophyta	Mediophyceae	Cymatosirales
MATOU-v2.43379837_3	43379837	ARG*LPPRKNID*TPNCTQIPATMSSSISLPRYTSASSALKNEPAPGTTASGAAASGDAWGGANDPLDFDLLAEYLLDDGAVGADDLDVSFDFNVETPPINPADQAGSTIVSVSPEQQAEISFADPLADATVQLASSRGRGPADGDIAGDLAQAQQRIATQTAASSSSAASSKGKAGVSRPSALPPRPLSHPGAVTGASLDSNKRRRVDVSAPLTATSTAMSGMIHNSLSALPLQKGGRHKSQAQIDRRRERNRILARRTRLRKKFFFESLQKDVTDLQRENALLKELVRNRLQPDVAGSILEQCKANEEMPSVISEQGYGILDKRDHSFIQSVQNSQQCFVITDPSLQDNPIVYASDDFLTLTGYSREEVLGRNCRFLQGTETSRSKIAQIRKALQNG…	Centric	Bacillariophyta	Mediophyceae	Cymatosirales
MATOU-v2.43381403_6	43381403	SFHQLACCGRLRERSSY*DRRHRATCRRINRLSLAYAARKKGKA*VTQRPP*S*QRKKLLTNMSSKVALPSFISASSTLKKSDSVDDALGQTTSSGDALDFDLLAEYLLDDGAPTGDIGINFDFSAETPPLAQGDYSSSIVSPDQQAEVSFADPLADATERMRATATGPSGDLAGDLAQVQHMIATQAKAAEQRVGSKAPTPLARNGNTVPPPLYLNHPGAPMNRAGVPLTTALDSNKRRRVDVAAPVVAGSSVAPVMSANGLMIPPNIPRGGRQKSQAQIDRRRERNRILARRTRLRKKFFFESLQKDVTDLQHENALLKEIVRRRLKPELSKGILEKCKANEALPSIVAEQTSELNQRDSTFIQSVQNSQQCFIITDPSLQDNPIVYASDDFLTLTG…	Centric	Bacillariophyta	Mediophyceae
MATOU-v2.43396603_5	43396603	FFESLQKDVSDLQRENAALKSIVRSRLKPDDARALLSQCNANEKLPNVVSNGQGSTTDENVARNSADGDGVVKQLDKEDFNLISSIQNSQQCFVITDPSLHDNPIVYASDDFLTLTGYSQEDVLX	Centric	Bacillariophyta	Coscinodiscophyceae	Thalassiosirales
MATOU-v2.43628013_4	43628013	KNSKIGCRDNRAGSFESSTLDSSTTRNYRIQQQTL*QH*VLTDCELCLHFAEVQSEKI*LKAIFSVFSSSSSSLSIKLIIVTVYSIQYTMATTNPYPQAPRFTSNHGGGLPPLSTAASNAIAQRGTPATLNLDDIFGDCFFTPDGETVFLSDETDRNEFIASTENNTAYIASRATDNGGMMPLPQAGGIDTTNLNNPGQPALVMGNAPQALPQIAALGAKAQQDHHMGYISTLNGQGMAAQMSGAAVSAASAAAKDSKKRRTRPGQDRKMSEQQKTERRERNREHAKRSRIRKKFLLESLQQSVALLKDENESLRGSIRSHLGEEQANQLLTKKNLEEQSEAAAAAGLIANDAHTANKVLDDPDFSFIKALQTAQQNFVVTDPSLPDNPIVYATQGFLN…	Centric	Bacillariophyta	Coscinodiscophyceae	Rhizosoleniales
MATOU-v2.43652098_3	43652098	KRGRGGASSSGGPKPEGQTKADRSKLVKERNREHAKRSRIRKKFLLESLQQSVSLLKDENEKLKSAIRSHLGDKEADALLSKQALADAAGAGGGLIASSSADANKVLDDPDFSFIKALQTAQQNFVVTDPSLPDNPIVYATQGFLNLTGYTLDQVLGRNCRFLQGPETDPKAVEKIRNAIEEGSDMSVCLLNYRVDGTTFWNQFFIAALRDAGGNITNYVGVQCKVSDQYAASVCEKQEEADAAAAAATVDGAGFKEES***AR*WFELNTNH*EREIFTHRQVLAPFIC*KFSLHLTSYGLIF**GLSRGSWLKVE*SIIICESTIEKDNACTTQTLFS*YDDYFSX	Centric	Bacillariophyta	Coscinodiscophyceae
MATOU-v2.43655129_3	43655129	GADPLVDGPVRINTGHNVTNDLEHVQQLIVHQANAQASVSSSNDLKSHMPEMDYKNYQNKNALPHPSAPLNQHLSSGADTTFYGAVPVPNNVPSNQESLTAQNPNKRQRTNPKNISKAPTPGLASNNAISSSSFNIQSNETSNNSNITPMQRQKQKSQAQIDRILARRTRLRKKFFFESLQKEVMDLQKENAALRNIVRTSIPDTSQVKSILEKCKKAELPSIVTEELGMTDSLDQQDFCLVRSLKTSQQCFVITDPSLQDNPIVYASDDFLTLTGYTREAVLGRNCRFLQGTDTDKSKVDKIRKAVAEGEDVSVCFINYTADGTAFWNQLFIAALRDTQNNIVNFIGVIVKVSGPGPDDPEGNKVLSNVANNETDDQNAPTEDIFNEDDGSDFQDIDA…	Centric	Bacillariophyta	Coscinodiscophyceae
MATOU-v2.43657153_3	43657153	ALPFH*TPTILPHSLPSIPLRRCHHLATTIHSGDSELIWSIVFGEGYRSQEIILFSPVVYFELIAQKRHFCITFPDKL*SFLKMAGQQNVFFNNGIQMPMFTGASQSTGQFGNTDVDLGDLFADYFVNEMEANDQRDSYNQLLALQAASAPVANPLLAPVPAATATAPQGLVPTLTNPNESLASMAASQQIQNVANNTNVNVALPIRRGIKTAWHSGTLPNLQSTYQVAGDILQQQQHQQQHQAQQHQAQQAFAHIAKRMKASDQNNSFLNTATPLSNSTSDAHANVATTSGSAISGRLGFTMVGGQLAVPNRSKENQNQTSENSETSQKASEVGGGISLPVGVGIRIGGQTGAVHQSQQADAANASSSSNVLQSGHWGANSGIWSSSGLMGVENGGGG…	Centric	Bacillariophyta	Coscinodiscophyceae
MATOU-v2.43657154_3	43657154	ALPFH*TPTILPHSLPSIPLRRCHHLATTIHSGDSELIWSIVFGEGYRSQEIILFSPVVYFELIAQKRHFCITFPDKL*SFLKMAGQQNVFFNNGIQMPMFTGASQSTGQFGNTDVDLGDLFADYFVNEMEANDQRDSYNQLLALQAASAPVANPLLAPVPAATAPQGLVPTLTNPNESLASMAASQQIQNVANNTNVNVALPIRRGIKTAWHSGTLPNLQSTYQVAGDILQQQQHQQQAFAHIAKRMKASDQNNSFLNTATPLSNSTSDAHANVATTSGSAISGRLGFTMVGGQLAVPNRSKENQNQTSENSETSQKASEVGGGISLPVGVGIRIGGQTGAVHQSQQADAANASSSSNVLQSGHWGANSGIWSSSGLMGVENGGGGLSEQVIAERRQR…	Centric	Bacillariophyta	Coscinodiscophyceae	Rhizosoleniales
MATOU-v2.43657155_3	43657155	ALPFH*TPTILPHSLPSIPLRRCHHLATTIHSGDSELIWSIVFGEGYRSQEIILFSPVVYFELIAQKRHFCITFPDKL*SFLKMAGQQNVFFNNGIQMPMFTGASQSTGQFGNTDVDLGDLFADYFVNEMEANDQRDSYNQLLALQAASAPVANPLLAPVPAATAPQGLVPTLTNPNESLASMAASQQIQNVANNTNVNVALPIRRGIKTAWHSGTLPNLQSTYQVAGDILQQQQHQQQHQAQQHQAQQAFAHIAKRMKASDQNNSFLNTATPLSNSTSDAHANVATTSGSAISGRLGFTMVGGQLAVPNRSKENQNQTSENSETSQKASEVGGGISLPVGVGIRIGGQTGAVHQSQQADAANASSSSNVLQSGHWGANSGIWSSSGLMGVENGGGGLS…	Centric	Bacillariophyta	Coscinodiscophyceae
MATOU-v2.43662059_2	43662059	FFQSKDFFSLKQEASVCVWILFSCFFLF*QLQRKQERKQARGKEARVKR*KSDPHRGEKRMADLSFNNNNNNNAVPSYLNDLFGDCFFTPEGEAVFLSEEADKNNIISSSETTPATVASRTLEDGSSVPMTSAGGIAATNLDKPGMQATVMGPSVATTTTTAASSSAVATQQPAPVPFMQLPQKGNHIGFASLPTSGRGGTGKSRRTRKMSEQQQNERRERNREHAKRSRIRKKFLLESLQQSVQLLKEENEKLKDSIKVHLGEDTATKLLAPEHLQSMSSSLASSSAGAGGAVPSQVNLAAAGKDGSIIANTTSDANKVLDDPDFNFIKALQTAQQNFVVTDPSLPDNPIVYATQGFLNLTGYTLDQVLGRNCRFLQGPETDPKAVDKIRKAIEAGID…	Centric
MATOU-v2.43679299_6	43679299	SGILALANGNATINATALNNGVIMNSNTSGVTTNNPLAAAATQGILLANNRPIAATNMQYGMSTTPQLSLLDEDQMAAERRLRNREHAKRSRVRKKFMLESLQQEVREMQEENSMLRMLVQKHIPTEALKIIDECCSKSVLFGTGEGVESEAWGDSQDKQEGEAKGGEAKGGEGESTSLQQPLLRSDFSLIESLTSGQQNFVLSDPRLPDNPIVFASPGFYELTGYTREQVLGRNCRFLQGAGTDRKAVDVIRTAVANGTDATVCLLNYKADGTPFWNQLFVAALRDADNCIVNYVGVQTMIEPNAGASALEDKVNAAHPISVGVDDGIDDKDAKE*YSDVCRL	Centric	Bacillariophyta	Coscinodiscophyceae	Thalassiosirales
MATOU-v2.43756583_3	43756583	QTQTSAVQNNAGALTMFAQQPSSSEQDGADLNGLTIDLDDLFHDCYFGDFPVPPFAEQPGTEAAPAPANPLPPVTANPLPPAAVVQAEPNATTALKRKAAQAVEPTPVSVLSSTSSSYTPPVTTSSTPSTVYSYPGFNSGVQGGSRQLTDQQKVERRNRNREHAKRSRLRKKFLLESLQEQIHGLQSEIEDLKGIIKKELPDRADSLLEKINGKQGQFTPLPMPSGFGPVKTLMEPDFRLMSALSGSQQNFAISDPSLPDNPIVYVSQGFLDLTGYTLDQVLGRNCRFLQGPGTDQSAVDVIRKGVREGVDTSVCLLNYKADGTPFWNQFFVAALRDAENNVVNFVGVQCEVSKAVVESQMSNSHQSQP*LCTFNFYF*KCRIKSVNK*TX	Centric	Bacillariophyta	Coscinodiscophyceae
MATOU-v2.43770761_5	43770761	ADSTPLLRSDFSLIESLTSGQQNFVLSDPRLPDNPIVFASPGFYVLTGYTREQVLGRNCRFLQGAGTDRKAIEVIRTAVANGTDATVCLLNYKADGTPFWNQLFVAALRDADNCIVNYVGVQTMIEPNAGASALEDKVNAAX	Centric	Bacillariophyta	Coscinodiscophyceae	Thalassiosirales
MATOU-v2.43804038_4	43804038	GDADDPSQPKKGSYTPIPLASGFGPVKTLMEPDYRLMSALSGSQQNFAISDPSLPDNPIVYVSQGFLTLTGYTLDQVLGRNCRFLQGPGTDQAAVDVIRRGVREGTDTSVCLLNYKADGTPFWNQFFVAALRDAEDNVVNFVGVQCEVSKAVVEKHISEGKTPGTALTT*AGGTYMCVMFI*CQVNKI*RKRKCIRRFSTGDPSSGLRIGGIVHIWYSALLTPD*FLVILQYGIIRGEHSSLCDALILYHH*KILLHLDFDGAQELLASQVVIIRKPC**RMVGD	Centric	Bacillariophyta	Coscinodiscophyceae
MATOU-v2.43905009_3	43905009	EGIDTSVCLLNYKADGTPFWNQFFVAALRDAENNVVNFVGVQCEVSKAVVEKHISEGKTPASSLPPGPS*RTGGIAFLFDAGAKQNY*QKCMFYCIILPTLLPKTX	Centric	Bacillariophyta	Coscinodiscophyceae	Thalassiosirales
MATOU-v2.43948725_2	43948725	GGVSPASAHNADRSSAVLHSHSQLMMGNGQEFGGSQAMSDQAIAERRQRNREHAKRSRVRKKFMLESLQEQVQKLQRENQTLRLLIQENIPDHA	Pennate	Bacillariophyta
MATOU-v2.44291896_1	44291896	ENLPLEVHPKIDFGIGATRESSWFCFLLHICTRSTWGYLQSSPVFFFVDATLCRFVFCLCGGDRLPCCRTVPPAEHR*HSACKARPILGRVNGASTRLLPRKYRVEYTVFQAF*PQHLNTFSLLVCANPFADAAVGSPDLFLNMSGFQKPMFAPQSGRAGDDLDLNDLFADYFMNERVDPLRTINQSVSTTNQQQVQPFLPTGRGIRTLYHTAAPTSEVANGTAPFQQQQLEGSSLSAEPVAKKHKGNMDAAGTVGLATIGSSAQRVQLPVGVGIQIGRRGGEAQAPGGLPVAHNQWGATGSGNSALAHVQHGQAGSLMGTQGPISNEQAVAERRQRNREHAKRSRVRKKFMLESLQEEVHQLQKENEELRKVVQAKIPEHAIEIINQCCAKSPLFDDN…	Centric
MATOU-v2.44291897_2	44291897	KTFLLRSIPK*ILALERPGKVHGFVFYSISVLGLRGDTFNQALSFSLLTRRCVVLFFVFVVGIACLAAEPSLPPSTDSTLHVKLGRYLEGSTAPAPGFSLANTVLNTLYFRLSNHNI*IPFRFLFVRILLPMPPLGLQTSS*ICQASKSPCSRLRAVG*VIHDRRNK*MF*LPVVHDLTHSFSKSHPYLV*THERVYFNGISFWITQAGDDLDLNDLFADYFMNERVDPLRTINQSVSTTNQQQVQPFLPTGRGIRTLYHTAAPRSEVANGTAPFQQQQLEDSSLSAEPVAKKHKGNIDAAGTVGLATIGSSAQRVQLPVGVGIQIGRRGGEAQAPGGLPVAHNQWGATGSGNSALAHVQHGQAGSLMGTQGPISNEQAVAERRQRNREHAKRSRVRKK…	Centric
MATOU-v2.44298347_6	44298347	SHSSTSSESPSRRYKFSNMGPANGDNADHPSAMSLFTPATAAAEQDEPQESSLDLDELFRDCYFGDFPIPLDGSLEMPPQSNDAAVGGTKRKATEAAPKYATTGGISAASSAGAIMVGKSSPMADAGKAGSNPVGTKELTEEQKVERRERNREHAKRSRLRKKFLLESLQEQIHDLQGQITTLKNVIKKELPDKAEALLKSIGPDGEYTPLPMPSGFGPVKTLMEPDFRLMKALSGSQQNFAISDPSLPDNPIVYVSGGFLSLTGYTLDQVLGRNCRFLQGPGTDQAAVDVIRRGIREGIDTSVCLLNYKADGTPFWNQFFVAALRDAENNVVNFVGVQCEVSKAVVDQQIKEGKMPAPTGGTGLPKE*TTGKGKKVGP*SIKS*IVRSLN*VALPLCMS	Centric	Bacillariophyta	Mediophyceae	Cymatosirales
MATOU-v2.44313033_2	44313033	FTAGKRCTT*YLPPLLELP*PRELVCCHLLIVCRESSSNFGFPGDRVFFQKGRTTHLELVRIFSGSRHQQQRNWNLQTLAPIEIGLDSTV*LATTCTTIYAENMSEQEPVPVSAPNFAPAGGTAGSEGAGGAAPQLSASTAAAVASRGTPATLNLDDIFGDCFFTPEGDAVFLGDQAGGGAGGAQDGGGGGGGGGGGVVASAEAVPTRMASRPAPAAAGAGTSAPAPSAGGGSSSGGTPANYVPVSYGGGIATTGLDNPSQAKSTVMGTAPTPTAGAPKPVPFVQPPQQRHHLQYATPAMLGGARTMPAGGAKRKTSTGPASVGARNDRKMSDKQKVERRERNREHAKRSRIRKKFLLESLQQSVALLKDENDKLRSSIHEHLGPEADELLKKENLAEA…	Centric	Bacillariophyta	Mediophyceae	Cymatosirales
MATOU-v2.44314624_3	44314624	*YA*WSGNGCSDVRCSCFCR*RSC*R*QKEENETGTRQEDE*ATKNGAKRT*SRTC*KISNPQKIPPRITPTICSSPQGRKRESPRLHPLTSRRRTSQQNESLRGSIRSHLGEEQANQLLTKKNLEEQSEAAAAAGLIANDAHTANKVLDDPDFSFIKALQTAQQNFVVTDPSLPDNPIVYATQGFLNLTGYTLDQVLGRNCRFLQGPETDPNAVEKIRKSIEDGTDMSVCLLNYRVDGTTFWNQFFIAALRDAEGNITNYVGVQCKVSDQYAATVCKKQDEDDAIAAQSHLGSLENDADDQEGNDSGDA*TLTLYQY*ILYVSVSLAWSKSKCNH*KCRYTIMSL	Centric
MATOU-v2.44328387_6	44328387	ARG*LPPRKNID*TPNCTQISATMSSSISLPRYTSASSALKNEPAPGTNAWGGANDPLDFDLLAEYLLDDGAVGADDLDVSFDFNVETPPINPADQAGSTIVSVSPEQQAEISFADPLADATVQLASSRGRGPADGDIAGDLAQAQQRIATQTAASSSSAASSKGKAGVSRPSALPPRPLSHPGAVTGASLDSNKRRRVDVSAPLTATSTAMSGMIHNSLSALPLQKGGRHKSQAQIDRRRERNRILARRTRLRKKFFFESLQKDVTDLQRENALLKELVRNRLQPDVAGSILEQCKANEEMPSVISEQGYGILDX	Centric	Bacillariophyta	Mediophyceae
MATOU-v2.44342963_1	44342963	WNVSDRQKVERRERNREHAKRSRIRKKFLLESLQQSVSLLKEENEKLRGSIKKHLGNEADELLTKENLAAAGSGGGLIAGSSSDANKVLDDPDFSFIKALQTAQQNFVVTDPSLPDNPIVYATQGFLNLTGYTLDQVLGRNCRFLQGPETDPKAVEKIRTAIEGGSDMSVCLLNYRVDGTTFWNQFFIAALRDAAGLITNYVGVQCKVSDQYAANVCKRQEEMDRAALNDDEGADEIPPGGDGHGDAISPAAGEEALAPVPAS*EATRRLPSPRGRGLIKATLQPQEYVGRGATGPVPIPYPSVHA*LFSLD*YYLTPDEPP	Centric	Bacillariophyta
MATOU-v2.44355136_3	44355136	NL*LLDSFSH**TSLSNIKV*YSV*ITMSSQNIQFPRFAPSSAPSSSLNMCEVDNLDVDLLAEYLLNDGQLNMASDVVFDFNLDTNTKGSAETSVVSPENSDEGSVRTDVPVAAAQINNGVATTANNVPIPPTLLYGAPFDTQPAPAPMTQPANQLPSLTPTIPNTNVAIAQPGANYTIQSQGNPAKRPRVIQNVPLMAVAPGIPNPMSVNPNAAALQAVANAIQNSTHPRAGRKKSQAQIDRRRERNRILARRTRLRKKFFFEALQKDVLELQRENRMLKQVVKSNIAGDAGQQILDSCDAFKKLPDGVLETCGENSAEYTGEDFNLVQSIKGSQHSFVITDPSLPDNPIVFASDDFLKLTKYNRDQVLGRNCRFLQGTDTCPEKVAAVKKCLATGDD…	Pennate
MATOU-v2.44404582_2	44404582	QLFAPDPNAPGESAALDLDELFHDCYFGEFPMPEEVTSSTAPAEPVVSKPAAAEPAKSEPTAPKPVAPKRSADQAGLDASSGRRPSRNSARKPAPSTSTSTERGLSTRPAASLTESQKTERRERNREHAKRSRLRKKFLLESLQEQIDGLQGEISTLKSIIKRELPDKAAALLKDIGDSDEADSAAPNKGSFTPLPMPSGFGPVKTLMEPDYRLMSALSGSQQNFAISDPSLPDNPIVYVSQGFLDLTGYSLDQVLGRNCRFLQGPGTDQAAVDVIRRGVMEGTDTSVCLLNYKADGTPFWNQFFVAALRDAENNVVNFVGVQCEVSKAVVEKHISEGKTPPLKS*STLALVPFSLTSVSQSSQSPQLPGLILITW*SFVGSSFIRX	Centric	Bacillariophyta	Coscinodiscophyceae	Thalassiosirales
MATOU-v2.44892340_6	44892340	DWRSNHS*CGGKQCWCRYLFAACSSEVFDQRRRGWRYKAGANGGPENRAEGAEQRTCQTQPPSKEVPS*EFAGADPRAAGGDRHVKKYYQGRASR*GRGATEEGRFDRGGFHSDSHSLWLWSCQNAHGARFPPHESAVWIPAELCNLRSQPPGQSYSLPDNPIVYVSQGFLDLTGYTLDQVLGRNCRFLQGPGTDQAAVDIIRKGIREGIDTSVCLLNYKADGTPFWNQFFVAALRDAENNVVNFVGVQCEVSKAVVDQQIKDGKMPAPIGGTAVTK*AIMWQFRNCMYRGVAVRTFL**QLLFV*DIDWIASTVVMMFYL**RSLFRWLIG*CIYRX	Centric	Bacillariophyta
MATOU-v2.44973204_5	44973204	KIRRAIEEGSDMSVCLLNYRVDGSTFWNQFFIAALRDAAGNITNYVGVQCKVSDQYAANVCKRQEEADRATVX	Centric
MATOU-v2.45169677_6	45169677	QNFVLSDPRLPDNPIVFASEGFYKLTGYTRDQVLGRNCRFLQGPDTDPRAVDVIRTAVANGTDATVCMLNYKADGTPFWNQFFVAALRDANNCIS	Centric
MATOU-v2.45177537_1	45177537	LPDSAAKLLQELELSNGTTDSDEERSMYKPQPMPSGFGPVKALIEPDFRLMHSLSNSQQNFAISDPSLPDNPIIYVS	Centric	Bacillariophyta	Coscinodiscophyceae
MATOU-v2.45563436_1	45563436	IPMPTNVIPQSVASTPAHAATNPFQYPLGSFPGTTNATSTQSTFSSSASTAKLTEQQKLERRERNREHAKRSRLRKKFLLESLQEQIHYLQSDIEKLTQLIRRELPNKADELLSNIQLSTGDGSKQDPSGNNMYKPLPMPSGFGPVKTLIEPDFRLMFSLSNSQQNFAISDPSLPDNPIIYVSQGFLDLTGYTLDQVLGRNCRFLQG	Centric	Bacillariophyta
MATOU-v2.46623489_3	46623489	PKAVDKIRKAIEAGVDMSVCLLNYRADGTTFWNQFFIAALRDASGNVTNYVGVQCKVSDQYAX	Centric
MATOU-v2.47356786_1	47356786	NMYKPLPMPSGFGPVKTLIEPDFRLMFSLSNSQQNFAISDPSLPDNPIIYVSQGFLDLTGYTLDQVLGRNCRFLQGPGTDQAAVEVIRKGMKEGVDTSVCLLNYKADGTPFWNQFFVAALRDANNQIVNYVGVQCEVSKAVVESHMEYIKSGDANDAGASASTT*MLW	Centric
MATOU-v2.47707708_3	47707708	DFQLIDSLSAGQQNFVLSDPRLPDNPIVFATPGFYRLTGYTPEQVLGRNCRFLQGSGTDPKSVDIVRKAIQSGSDCTVCILNYKADGSPFWNQFFVAALRDSDNCIVNYVGVQTEIEPDAGANALEDRVNAVMPLANKDEDDIEVK*RNYVELETSEMNNALRIATVLIARDVLFRIKS*AISD**KM*NASLSFRK	Pennate	Bacillariophyta	Bacillariophyceae	Bacillariales
MATOU-v2.47797653_1	47797653	LDQILGRNCRFLQGPETDPKAVERIRKAIEQGHDMSVCLLNYRVDGTTFWNQFFIAALRDAAGCVTNFVGVQCKVSDQYAATVTKQQEEEEAAAAAAAAEE*ISNEFVLGCR*TGLGRILKKKKNSTSRL*RRFVNCV*CKQLMIVYRVPVKDYFAQDKIIITF*	Pennate
MATOU-v2.47800707_5	47800707	MSVCLLNYRVDGTTFWNQFFIAALRDASGTVTNFVGVQCKVSDQYAATVTKQQEEEDNA*AQGYCSKKIE*KNSTKKQ*PEDACARKKASKPQNRI*RTEHX	Pennate
MATOU-v2.47854169_2	47854169	AIEHGDDLSVCLLNYRVDGTTFWNQFFIAALRDAAGNITNFVGVQCKVSDQYAASVIKEQQKEEEERAQX	Pennate
MATOU-v2.48407377_1	48407377	FSHSSTSSESPSRRYKFSNMGPANGDNADHPSAMSLFTPATAAAEQDEPQESSLDLDELFRDCYFGDFPIPLDGSLEMPPQSNDAAVGGTKRKATEAAPKYATTGGISAASSAGAIMVGKSSPMADAGKAGSNPVGTKELTEEQKVERRERNREHAKRSRLRKKFLLESLQEQIHDLQGQITTLKNVIKKELPDKAEALLKSIGPDGEYTPLPMPSGFGPVKTLMEPDFRLMKALSGSQQNFAISDPSLPDNPIVTLASPTTRSCMCLEGSSV*LVTLLTRCLAETAASFRVREPTRPLWMLSAGAFGRVSIRPSACLTTRLMAHPSGTSSSLLPCVTPRTTLSTL*AFSVKFRRPS*TSK*RKGRCRPLRAEQVCRRSRQLGRERKWALDR*RAETYV…	Centric	Bacillariophyta	Mediophyceae	Cymatosirales
MATOU-v2.48407377_3	48407377	FTFVNIFRIAVSTI*ILKHGSC*W*QCRPPQCHVTIHPGDCCCGAGRTPGIVAGP*RALS*LLLWRLSHPARRFSRNAPPEQ*CGGRRYEAQGHRGRPQIRYNGWNLGCELGWSDHGGKVLANGGRWKGRKQPCRNEGVDGRTKGREKGEKSRTCQALAP*EKVPP*ISPGADSRPAGSDYHAKERYQEGIT**GGGTSEEYRP*RRVHPAPDALWIWPS*DSDGARFPSHEGPVGIAAELCHFRP*PPRQPDRDPSLPDNPIVYVSGGFLSLTGYTLDQVLGRNCRFLQGPGTDQAAVDVIRRGIREGIDTSVCLLNYKADGTPFWNQFFVAALRDAENNVVNFVGVQCEVSKAVVDQQIKEGKMPAPTGGTGLPKK*TTGKGKKVGP*SIKS*NVRS…	Centric	Bacillariophyta	Mediophyceae	Cymatosirales
MATOU-v2.48453183_3	48453183	SASEPEPVSTASAAAQDPGNSNAGAMQFFAPDPNAPGYSTQLDLDELFRDCYFGDFPMPEEATSTEMAPATSPPEPAAAPKRTADQAGLAEKAAITPRASRSSAKKATTAPKSSGEKSASEKGLSARPTASLSHSQRAQRRTRNREHAKRSRLRKKFLLESLQEQVEGLQGELSALKSIIRRELPDKAANLLKDAGSGPDGDDCPGLPMPSGFGPVKTLMKPDYRLMSALSGSQQNFAISDPSLPDNPIVFVSQGFLDLTGYTLDQVLGRNCRFLQGPGTDQAAVDTIRHGVKEGVDTSVCLLNYKADGTPFWNQFFVAPLRDAEDRVTNFVGVQCEVSKAVVEKHISKG*TEPAPLLFGVLRLLYVPTREVTES*SSKSTHCESLLRTVGILLLRKIV…	Centric	Bacillariophyta	Coscinodiscophyceae
MATOU-v2.48466099_1	48466099	IDIIDIDAARNAREVTPPLVDLDDFSLPESFPLPENFFSLPPENVASGADDFSLPEDISLPKNFFSLPPEDVASGDGVGAAVDAGGCGGKRTANQAGLMRATATPRARSRRKAAIPKSTTTKPLSSRRMRNREQVKRSRLRKKFLLESLEEQVRGLQGDLYALKSIIRRELPHSAVSLLKDTGDGPDERSVGGLGRSFYTPCLPMQSVTITDPSLPNNPIVYASQGFLDLTGYTLNEVLGRNFRFLQGPATDKATVDVMRRGFKEGNDMSVCLLNYKKDGTPFWNQFFVSSLKDTEDNVVNFLGVHCEVSKFVVE*NK*KGKPCSRHCTVTCLVCIS*QLHGELNCADNYAKSWTTIIAHNSAHKTVCLGELIGSWLTTSSNHNGS*VG*VSVLEHRTT…	Centric	Bacillariophyta	Coscinodiscophyceae
MATOU-v2.48466100_3	48466100	DVASGAGVGAAADAGGFRRGKRTANQAGLMTVTATSRARCRRKAAVPPSSLIERRTRNREHVKRSRLRKKFLLESLEEQVRGLQGDLFALKSIIRRELPHSAVSLLKDTGDGPDERSTGGPGRSVYTPCLPMQSVTITDPSLPNNPIVYASQGFLNLTGYTLNEVLGRNFRFLQGPATDQATVDVMRRGFKEGTDMSVCLLNYKKDGTPFWNQFFVSSLKDREDNVVNFLGVHCEVSKFVVE*NK*KGKPCSRHCTVTCLVCIS*QLHGELNCADNYAKSWTTIIAHNSAHKTVCLGELIGSWLTTSSNHNGS*VG*VSVLEHRTTTSISGVIM*WKVVMCSKRKERVTEKK**LEEDV*VX	Centric	Bacillariophyta	Coscinodiscophyceae
MATOU-v2.48466100_3	48466100	DVASGAGVGAAADAGGFRRGKRTANQAGLMTVTATSRARCRRKAAVPPSSLIERRTRNREHVKRSRLRKKFLLESLEEQVRGLQGDLFALKSIIRRELPHSAVSLLKDTGDGPDERSTGGPGRSVYTPCLPMQSVTITDPSLPNNPIVYASQGFLNLTGYTLNEVLGRNFRFLQGPATDQATVDVMRRGFKEGTDMSVCLLNYKKDGTPFWNQFFVSSLKDREDNVVNFLGVHCEVSKFVVE*NK*KGKPCSRHCTVTCLVCIS*QLHGELNCADNYAKSWTTIIAHNSAHKTVCLGELIGSWLTTSSNHNGS*VG*VSVLEHRTTTSISGVIM*WKVVMCSKRKERVTEKK**LEEDV*VX	Centric	Bacillariophyta	Coscinodiscophyceae
MATOU-v2.48836602_2	48836602	SKRSFTDAIQSQTSSSMFNNNSNHTKTSMNAGKLTDQQRLERRIRNREHAKRSRLRKKFLLESLQDQIHGLQTDIEKLTSLIKKELPDSAAKMLQELELSNGTADNNEERSMYKPLPMPSGFGPVPMPSGFGPVKALIEPDFRLMHSLSNSQQNFAISDPSLPDNPIIYVSQGFLDLTEYRLDQVLGRNCRFLQGPGTDQAAVEVIRKGMAEGIDTSVCLLNYKADGTPFWNQFFIAALRDANNKIVNYVGVQCEVSKAIVESHLEQIECEX	Centric
MATOU-v2.49182825_5	49182825	PNRRLDDINSQTWVLLMVTMPTTPVPCHYSPRRLLLRSRTNPRNRRWTLTSSFVIATLATFPSR*TVLSKCPPRAMMRLEMPPQSNDAAVGGTKRKATEAAPKYATTGGISAASSAGAIMVGKSSPMADAGKAGSNPVGTKELTEEQKVERRERNREHAKRSRLRKKFLLESLQEQIHDLQGQITTLKNVIKKELPDKAEALLKSIGPDGEYTPLPMPSGFGPVKTLMEPDFRLMKALSGSQQNFAISDPSLPDNPIVYVSGGFLSLTGYTLDQVLGRNCRFLQGPGTDQAAVDVIRRGIREGIDTSVCLLNYKADGTPFWNQFFVAALRDAENNVVNFVGVQCEVSKAVVDQQIKEGKMPAPTGGTGLPKK*TTGKGKKVGP*SIKS*NVRSLS*VDN…	Centric	Bacillariophyta	Mediophyceae	Cymatosirales
MATOU-v2.49637301_2	49637301	DNGGGTKELTDKQKLERRERNREHAKRSRLRKKFLLESLQEQIHELQEQMDKMKDALRREAPDRAEGILSAILGNKDKYTPLPMPSGFGPVKTLMEPDFRLMSALSGSQQNFAISDPTLPDNPIVYVSQGFLDLTGYTLDQVLGRNCRFLQGPGTDQSAVDVIRKGIAEGIDTSVCLLNYKADGTPFWNQFFVAALRDAENNVVNYVGVQCEVSKAVVEKHMGKEFKK*HASPS*RSLCLHTVCVVFKMAIVPVVRTN*LWNEMSAGLGRIKRFAWK*LN*RWTTGFFLSSSTV*RRC*GQHFNRFX	Pennate
MATOU-v2.50818204_2	50818204	AQQNFVVTDPGLPDNPIVYATQGFLTLTGYTLPQVLGRNCRFLQGPDTDPRSVEKIRKAIEVGSA	Centric
MATOU-v2.50878663_5	50878663	VSVTLVNYTADGTPFWNKLFIAALRDAQNNIVNFIGVIVKVASPEPGDPEFGKSIGENDKEDVDNDHGADADGTVKAIEGAVDAAVAAAPX	Pennate	Bacillariophyta	Bacillariophyceae	Bacillariales
MATOU-v2.51875052_2	51875052	DGTTFWNQFFIAALRDADGNVTNFVGVQCKVSDHYAATVTKQQQEEDEMGAGDQ*SWQNLNY*LFLPPSYGYIRLFREIVLHWPSNIIINK*SNDLSVYVGGCHYL*VTQK*GFVGECHYQYVE*SKDLTLSNHLRIIKMMKKLRKACLMFISQVMFWNLLRNKD*CA*I*SIEHEIRENFHTX	Pennate
MATOU-v2.51928594_6	51928594	IDSLSAGQQNFVLSDPRLPDNPIVFATPGFYKLTGYTAEQVLGRNCRFLQGSGTDPKTVDIVRKAIQSGSDCTVCILNYKADGTPFWNQFFVAALRDSDNCIVNYVGVQTEIEPDAGANALEDRVNAVMPLASKEDDYEEGKQKS**X	Pennate	Bacillariophyta	Bacillariophyceae	Bacillariales
MATOU-v2.51945006_4	51945006	TGYSREDVLGRNCRFLQGAHTSKEKLDLIRKGLATGDDVSVTLVNYTMDGTPFWNKLFIAALRDAQNNIVNFIGVVVKVASPEPGDPDFGKSIGEEKEETSVDRKDADETVEAVEGAVDEAVVANPTVVSG*SILFARKF*PYSNRS*LNWMQNLIESMVEG*HL*ILILCTPRNRSLTYISNDASLDTIIKMFQSLCQHVIIILCRNVNQMMTRTLSTTTRACERA*FVILYFEPPKNTIFE*KN*ARYS	Pennate	Bacillariophyta	Bacillariophyceae	Bacillariales
MATOU-v2.52010293_4	52010293	KDIIKTEIPDKAESLLSKLSDGNKKGKFTPLPMPSGFGPVKTLMEPDFRLMSALSGSQQIRLMSALSGSQQNFAISDPSLPDNPIVYVSQGFLDLTGYNLDQVLGRNCRFLQGPGTDQSAVEVIRKGIREGIDTSVCLLNYKADGTPFWNQFFVAALLDAENNVVNFVGVQCEVSKAVVDKHIAEGKTPPLSTK*DHISTVYNAMTLSSIRRDNSVV*QSMVL*LMVSQA*IIQ*CCCC*IANYSKRFHHHIVIIQRKKITII	Pennate	Bacillariophyta	Coscinodiscophyceae
MATOU-v2.52115903_2	52115903	RSHLGDKEADALLSKQALADAAGAGGGLIASSSADANKVLDDPDFSFIKALQTAQQNFVVTDPSLPDNPIVYA	Centric	Bacillariophyta	Coscinodiscophyceae
MATOU-v2.52312371_6	52312371	HGGYTLDQVLGRNCRFLQGPGTDQSAVEVIRRGIKEGVDTSVCLLNYKADGTPFWNQFFVAALRDAENNVVNFVGVQCEVSKAV	Pennate
MATOU-v2.52364785_2	52364785	PSGFGPVKTLMEPDFRLMSALSGSQQNFAISDPSLPDNPIVYVSQGFLDLTGYTLDQVLGRNCRFLQGPGTDQSAVDVIRRGVREGVDTSVCLLNYKADGTPFWNQFFVAALRDAENNVVNFVGCNV	Centric
MATOU-v2.52565259_1	52565259	WQHLPLPLRLYQFNLNKLCQVSQ*QRDRNLKWGQQQNYLPLLRRTWPRRVE*LVDWDSILEMFNTVVLISCQDFPLRQPPLHTSTATIAQQQGSGVSLPVGRGIRLGGAGGVAPATAQKIPSVNGMIWGGHTGVSDQAVAERRQRNREHAKRSRVRKKFMLESLQEQVASLQRENQRLRTLVQDNIPEHAQMIISECCTSSPLFTDGTFDGSQQSAGEDESGEAKKAALVRSDFQLIDSLSAGQQNFVLSDPRLPDNPIVFATPGFYKLTGYTAEQVLGRNCRFLQGSGTDPKTVDIVRKAIQSGSDCTVCILNYKADGTPFWNQFFVAALRDADNCIVNYVGVQTEIEADAGANALEDRVNAVMPLANKEDDEEEGKQKT	Pennate	Bacillariophyta	Bacillariophyceae	Bacillariales
MATOU-v2.53056607_4	53056607	SIEEGTDMSVCLLNYRVDGTTFWNQFFIAALRDSGGAITNYVGVQCKVSDQYAATVTKQQEE	Pennate	Bacillariophyta
MATOU-v2.54706933_5	54706933	DKLRTSIRKHVGDEQAERLLEQKMDGSNGDMRLTTQSQGAANKVLDDPDFSFIKALQTAQQNFVVTDPSLPDNPIVYASQGFLNLTGYSLDQILGRNCRFLQGPETDPKAVERIRNAIESGHDLSVCLLNYRVDGSTFWNQFFIAALRDAAGNITNFVGVQCKVSDTYAASVIKEQQKEEEEQQQQQQQQQQRNSRKKTKSSSSNNSNSSNNNSNNNKMVQQVTFNRSTERQNA*PMKKLKKSIQFYMESRNKQAMIFNCKETNGAHHTHX	Pennate	Bacillariophyta	Bacillariophyceae	Bacillariales
MATOU-v2.56539341_4	56539341	SGATSNDKRNK*ASHQLSQK*RSIFLIETIINFKTSKFYLL*YFARHSGYLRSQTNRKTELFRFLLSLSR*NTIYMSAPIMSQPVTIPVFGSTSTQQQQPTQQQGSGEWYMDDGGQDMDFDLLAEYLLEEPGSSQTGGFDFNGESGVAQARDIITQHAATIASTPAPAAPTPAAPAPKTQVVQYVPVAAPPPLVMSPPPQIAAQGMAVPQTIPQYIPQQTTMAPAPSTATTQRAPGRSAQKKTGETKRRRPNPPEVAAQGLINTSYMTNGTANMSPAVVAAAAAAAAMQGRGRKKTQAQIDRRRERNRILARRTRLRKKFFFESLQKEVTELQKENAALRDIVRTEIEGDEGRQLLEQCNAARKLPREVLEACGENPDLDQEDFNLVTSIQQSQHSFVI…	Pennate	Bacillariophyta	Bacillariophyceae	Bacillariales
MATOU-v2.59086479_3	59086479	ELLQECNASEKLPPAVIEACGEHGGDIDQQDFNLVRSIQQSQHSFIITDPNLQDNPIVFASDDFLSLTGYSREEVLGRNCRFLQGTETSQAKVEEIRKGIAIGDDVSVTLVNYTADGTPFWNKLFIAALRDAQNNIVNFIGX	Pennate
MATOU-v2.59099531_3	59099531	ILARRTRLRKKFFFESLQKEVMELQKENAALRDIVRNEIEGDEGRQLLEQCNAARKLPREVLEACGENPDLDQEDFNLVTSIQQSQHSFVITDPSLQDNPIVFASDDX	Pennate	Bacillariophyta	Bacillariophyceae	Bacillariales
MATOU-v2.59099532_4	59099532	FLQGTNTSKEKLDLIRKGLATGEDVSVTLVNYTADGTPFWNKLFIAALRDAQNNIVNFIGVIVKVASPEPGDPDFGKPLSPEAEGKQAGNGDADGTVKAIEGVVTAAVAAAPSVMSG*IGMTLFDMAHTDSNSQASGPLPRPRYFLETFLGFLDAV*KLENNDGRYYNTCNGYS	Pennate	Bacillariophyta	Bacillariophyceae	Bacillariales
MATOU-v2.59236168_1	59236168	AAVDIIRKGIREGIDTSVCLLNYKADGTPFWNQFFVAALRDAENNVVNFVGVQCEVSKAVVDQQIKEGKMPAPVGGTSLT*LCRSKVLSFL*CTFYKQGDKACMSRGNP*LSLFDAYPCYRGMAVX	Centric	Bacillariophyta	Mediophyceae	Cymatosirales
MATOU-v2.61391603_5	61391603	NLTGYSLDQILGRNCRFLQGPETDPKAVERIRSAIEQGNDLSVCLLNYRVDGTTFWNQFFIAALRDASGSITNFVGVQCKVSDQYAASVTKQQEEEDVQ*VFSSLEWKMALCGTFFSVGMCLRLLE*IIDWMEHSSTVITALQRHICTFIQN*KNSX	Pennate
MATOU-v2.61563451_4	61563451	EELGMMSGGLDQQDFCLVKSLKHSQQCFIITDPSLQDNPIVYASDDFLTLTGYARDSVLGRNCRFLQGADTDKSKIDLIRKGVSEGEDVSVCLLNYTADGTPFWNKLFIAALRDTQNNIVNFIGVTVKVSGPAPD	Centric	Bacillariophyta
MATOU-v2.61689776_1	61689776	KRRGRVPSSTRVGPL*SRASSCNLLASVINHRQMSAATKALPQFSLPEERDLNHSSMDTAALDFDLLAEYLLEDVGNGGFDFGSISVSTFRLRAMILSRRAFNSPRRLRRWTITRLSRLTIPTPPTRSR*LVYRRLIIGRRLGLPCRPPAEMLPWGRRRRRRPKLPP*WPRFSLLSRLRLPTKRWCPPRYSSR*SLPPRDLPS*PTPPRPPLFPTSFPRCASQPQPVAPKAPVAQPPRPTAVSAPSSNQPNKRPRVSGNPQSSTMAKASAYSFAGSNTTTLATAAMAAQINKAHPMPPAPARILARRTRLRKKFFFESLQKDIADLQRENAALKSIVRSRLKPDDARSVLDQCDAHKKMPGDVVGSSQFKENDGTNLAAAAPDGGSSVKKLDREDFSLI…	Centric	Bacillariophyta	Coscinodiscophyceae	Thalassiosirales
MATOU-v2.61699111_3	61699111	RLRKKFFFESLQKEVVDLQKENAALRNIVKTSIEPTQANTILDNCKKAELPPIVIEELGMMSG	Centric	Bacillariophyta	Coscinodiscophyceae	Rhizosoleniales
MATOU-v2.61733335_6	61733335	RRELLPASPPPPPLPPLPPLSAACPHGPQRPSPTARRPNVVKGTGSTQSGLASGRSSCWSRYREQIDGLQGEISTLKSIIKRELPDRAADLLKDIGDSDEADSTAHNKGSFTPLPMPSGFGPVKTLMEPDYRLMSALSGSQQNFAISDPSLPDNPIVYVSQGFLDLTGYSX	Centric	Bacillariophyta	Coscinodiscophyceae	Thalassiosirales
MATOU-v2.61762862_3	61762862	NRSTT*TKSHPCKTHTSAEEILFRKSSKRSN*LTG*KHYAQKCYTLTHISAFEGFRYPDKMQGEK*NSRYCVRTQSLQSSQRSFIITDPSLQDNPIVYASPGFLTLTGYSREDVLGRNCRFLQGRDSCPQKIEKLKKAITFGDDIGVCLANYKADGTPFWNQIFIAALRDAHNNIVNFVGVLSKVSGPSPDDPEYGKVLTKNSQEAVAAATAASSVSQM	Centric	Bacillariophyta	Coscinodiscophyceae	Leptocylindrales
MATOU-v2.61787029_1	61787029	ATAGGAGANGKGKKRRQRPGQERKMSEQQKTERRERNREHAKRSRIRKKFLLESLQQSVALLKEENESLRSSIRTHLGEEQSNQLLTKKNLEEQSEAAAAAGLIASDANNANX	Centric	Bacillariophyta	Coscinodiscophyceae	Rhizosoleniales
MATOU-v2.62084764_5	62084764	AIYES*AGEGDVSQLDLDELFRDCYFGDFPVPVTSDDGINPPPATMPLSLSPPPPTAGIKRKAAVDLPKTNAPPPPQPAAAAAKNSIASLPALPVIDVSAATAVPVATKSATATTATATVTATSIGGGTLESSVSSSNKQLTAAQRVERRERNREHAKRSRLRKKFLLESLQGQIHGLQAEIEALTNIIRTELPEKADKLLSTVNEKPKVAGADKFTPLPMPSGFGPVKTLMEPDFRLMSALSSSQQNFAISDPSLPDNPIVYVSQGFLDLTGYTLDQVLGRNCRFLQGPGTDQSAVDIIRKGVRDGLDTSVCLLNYKADGTPFWNQFFVAALRDAENNVVNFVGVQCEVSKATVEKQRSK*CIQY*CNYQLLLSLSR*FVTFSQFKFIEEVPHQ*IWQ…	Centric	Bacillariophyta	Coscinodiscophyceae	Leptocylindrales
MATOU-v2.62108334_6	62108334	LQDTTCIAISQLPLLP*FYEPVFKLCKPL*STIIAVISRNYNFFQGELQHKYITL*SINYCT*KMTSTTIPPLPRFVSATDKEQYIAINNASSNNKNANSTTTDDNNVEQQISDDATSMFSTLMNGDADFDLLAEFLLDEGDGVSAATCSNVPTATAAISTVSVTNSDSDDFSPSVATAAAHADPLADAAATAATKGDSAVNAAVNIFNQDLLEIESLFSTQQKNNTLKPNSVESSTTISNSKVTASDGNKGKRKYAHTASTTQPNIPLATQSSNAVTSTLNSGNTNAPQRQKSQAQIDRRRERNRILARRTRLRKKFFFESLQKEVTDLQGENIMLKNAIRSHISPPSKASDILIKCKAKNDIPAIVYEHVLGTSEIDKQDVSLIQSLQSSQRSFIIT…	Centric	Bacillariophyta	Coscinodiscophyceae
MATOU-v2.62142571_6	62142571	DGTPFWNQLFVAALRDNENCIVNFIGVQCAVETERESTLLEDKVNSVLPLAMKDDAACAAEK*Y*VEN*RSWC*F*RSCISLFVKSEINIIISKYSSLQK*RSNALYEDNYMRYIFEGANIDNLCTLVFTGDFIEV*LLSCALLTYIVKITT	Centric	Bacillariophyta	Coscinodiscophyceae	Leptocylindrales
MATOU-v2.62170180_2	62170180	TDQSAVDVIRKGIREGVDTSVCLLNYKADGTPFWNQFFVAALRDAENNVVNFVGVQCEVSKAVVDKQMAEKGYGIKDDKP*KYHRLLLRN*SAAVLVCSCMLVLLVIQQPYWSQYQK*NNEWTR	Centric	Bacillariophyta	Mediophyceae	Hemiaulales
MATOU-v2.62184579_2	62184579	DNPIVYASQGFLNLTGYSLDQILGRNCRFLQGPETDPKAVERIRHAIEQGNDLSVCLLNYRVDGTTFWNQFFIAALRDASGNITNFVGVQCKVSDQYAASVTKAQEEE*ARTDFCCCWKMCSAL*DIND*IEGLYCH*NSREEKKRGKIL*DINEELIFLGYVDVG*NKYH	Pennate
MATOU-v2.62275547_6	62275547	TPSATAGGIQHNQWGRGGITLPPQAQMWQHAHGVDLNKPVSSAQEQAVAERRQRNREHAKRSRVRKKFMLESLQEQVRALQRENTSLRMIVQDKLPTLAQKIFEECCVTSQLFKDNNGLVDTGVGAKNADGLMKSDFNLIQSLASGQQNFVLSDPRLPDNPIVYASAGFYNLTGYSREQVLGRNCRFLQGPGTDPKHIEMIRSAVAKGNDFSVCVLNYKADGTPFWNQLFVAALRDTDNCIVNFIGVQCAVETEGESTLLEDKVNSVLPLAIKENPNPLGLSKPP*NGLCCIEG*Y*VCYSGVRHTLIPYLLLLVVG*YRRNLFATX	Centric	Bacillariophyta	Coscinodiscophyceae	Leptocylindrales
MATOU-v2.62371171_2	62371171	SVEKIRKAVETGNDMSVCLLNYRVDGTTFWNQFFIAALRDANGNITNYVGVQCKVSDQYAANVLKKQEEGVKSYEDEDMEEDGPL	Centric	Bacillariophyta	Coscinodiscophyceae	Leptocylindrales
MATOU-v2.62722065_4	62722065	SGFGPVKTLMEPDFRLMSALSGSQQNFAISDPTLPDNPIVYVSQGFLDLTGYTLDQVLGRNCRFLQGPGTDQSA	Pennate
MATOU-v2.63417529_1	63417529	SFP*VQLEVVLVVLQYFLYVCENWRILSSRMLAKSN***VNEMNSRLQHSL*HSLC*S*IHKIGRIQEEFYCFSRKARSEKKDQSKKSNLVNITEKRREVVG*EDQDLLLKESLFHCFFQGILIHSLITTFLI*QYIKKRRKPGHE*SDQYIKKRRKPGHE*SDDACCFTRITSKLHPSKSCH*NIRS*ASRQLCLCRWR*SN*F*LTSRIFT*RRA**C*YLCF*FQVSC*FRF*TFNSLLLNLTLEFFFLIIYSTPSIGSDAQPTGVVSPEVDNGSFADPLADHTFALKPTKQAVPTITFEEPKFQVLSTLSVSNAPTPLAPAPSALAMTVPPTLQGIAPMSVAQAGQTMIVHQHKRPRIHAPSTSVPSTQARQVQMMSNMVATQRGGRQKSQAQID…	Centric	Bacillariophyta	Coscinodiscophyceae
MATOU-v2.63417530_2	63417530	LFHKCNLKSSSLSCSTFCTYAKTGEFSVLECWRRAINDE*TR*TRDYSTVCNTLSARARSIR*AGFKRNFIVSVEKLEAKRRIKAKRVIW*ILLKRGEKS*DKRIKICYSKNHCFTVSFKVS*FTH*LQHF*FSNILRKEENLVMNEVINILRKEENLVMNEVMMPAALPVSLPSFIPASHATKISDPKHQDNYAFVDGGDQIDFDLLAEYLLDEGHNNVDTSAFDFSTPSIGSDAQPTGVVSPEVDNGSFADPLADHTFALKPTKQAVPTITFEEPKFQVLSTLSVSNAPTPLAPAPSALAMTVPPTLQGIAPMSVAQAGQTMIVHQHKRPRIHAPSTSVPSTQARQVQMMSNMVATQRGGRQKSQAQIDRRRERNRILARRTRLRKKFFFESLQKDV…	Centric	Bacillariophyta	Coscinodiscophyceae
MATOU-v2.63428973_1	63428973	LHC*IKNATLSLFVWVSIFLFYLLTSESVRKLSLFQCWCDCRQIKIYKKEHGSIPR*KK*KAKPERSQLHRRFLDSFDFHVTFAKMSSNQNALDNMQRLLFAPVNQGAKDDIDLSDIFAEYLNEGDDPLTTFGYAQSFGGLGVQQQAPQQPQQQQQQQQQQQQQVSYPMYNVAEKPAQIQATTFNAPVMQQPQAVTLPTGYGIKTAFHAGVVGTAAQVQEHPAKKAKVENETQVNMQQPSATLATVPPVGANNLSTSGSALSGRLGFSMMGGKLAMSNANDTTQQAQTHNTKLPTAPGNITLPVGVGIRLGGVIPQAINTKGGVGMNSYNWGNGVNVNKPGQTTSQSGHSQYPMWNGSNSIGPGGMSEQAMAERRQRNREHAKRSRVRKKFLLESLQAE…	Centric	Bacillariophyta	Coscinodiscophyceae
MATOU-v2.63455958_5	63455958	FIHHTQQDSESFVASR*ANNPSSFYHPPIMTDVPPLSAAAQAALESRPQINLDDIFGDCFFTPDGEAVFLNDSSESVRSTALPSSETTQSVVASKPTQSQNGEMATVSVNAPPLGKTQTGSTLRGEGFIAANDPQATTNVRAKIMSSAPPAQQMHHMKFISRVPAPVDDKKRKMGVGVSNVNPMGRSNERKMSEQQKVERRERNREHAKRSRIRKKFLLESLQQSVAILKEENEKLRHSIRQNLPSEEAEMLINAKVPKDNIIANNAADANKVLDDPDFRFIKALQTAQQNFVVTDPSLPDNPIVYATQGFLNLTGYSLDQVLGRNCRFLQGPETDPKSVEKIRNAIETGNDMSVCLLNYRVDGTTFWNQFFIAALRDANDNITNYVGVQCKVSDQYAA…	Centric	Bacillariophyta	Coscinodiscophyceae	Leptocylindrales
MATOU-v2.63467364_4	63467364	KFLLESLQAEVRTLQTENEQLRMLIQYKIPQHAQKILDSCCEKNPLFGENESSEKNNNQTELVKSDFNLIESLTSGQQNFVLSDPRFRTAEFCIIRPPFT*QSNRFRKRGFLSAYRIYTRTGAWKEL*IFARAGHRS*SC*HHSDGNC*WDRFNYLYFELQGRRYTVLESIFCCCS*RL*ELHR*LCRCTMCG*S*CWGISSGG*SERSTSPTT*S**AQ*LKRF*MTP*LWSSDY*CS*LM	Centric
MATOU-v2.63467364_6	63467364	NFSWSLCKQKCGLYRLKMNNFGCLFSTKFRSMLKRFLILAVRKILFSVKMNRQKRTTTRPSLLNLTSI**RV*LPDSRILYYQTPVSGQQNFVLSDPRLPDNPIVFASEGFYQLTGYTREQVLGRNCRFLQGPGTDPKAVDIIRTAIANGTDSTTCILNYKADGTPFWNQFFVAALRDSENCIVNYVGVQCAVDPDAGASALEDKVNAVLPLQHKADEHSS*NVSK*RHNFGHQIINVHN*X	Centric
MATOU-v2.63489543_2	63489543	SDIRGQRSGS*IIYRMDDLVA*VLFNVTLRTP*PGLSLRRSCDTSKNINSLYPRNITRKSCVCCGKDS*SCECCGKR*LSSNSITVHMSCDPNSSQYYGTSYGQQVQQPVFASNSGSNQISGGDDFDLNEIFADYFLDEVNATLTPSVVNVHHPSQNLPTGRGIQTAWHSTAASTTTQNQQDDQQAWKKTKYTAPPQDQYLLGDNDFSAQPSPAPTSVMNAGDSQQHPQSQVQQQQQAPRSSSALTGRLGFQMGVKNTYAQPSDAAHTMSSLQESNTTSVNLPVGVGIRVPGAVQHQNQATTAPVGAIQHNQWGKGGITLSSHGIPAGGGAVNKVNGLIPGMGVDLSKFGTGGTADDQMAERRQRNREHAKRSRVRKKFMLESLQEDVRQLQRENTDLR…	Centric	Bacillariophyta	Coscinodiscophyceae
MATOU-v2.63517519_1	63517519	FCLYNMSHEVQKPIFAAASANHQGDDIDFNEIFSEYFTNEFENPIDAYTGTMGNSSGGVVAMQQVVAGSPVAQHSLAMAGSESLPTGGIRTAFHSAAAAAAVAPAGQGVHYQPTKKAKVEHHAGISFPHPGGLTSRLGVPMPLLQGPNGSQGMAAQLGANPATAGVALPVGVGIRLGGAGGVAPTTAQHAARAGGPGFLWGGPQASGISDQAIAERRQRNREHAKRSRVRKKFMLESLQEQVSSLQSENQRLRTLIQDNIPEHAQRIISECCSKNTLFGGKATAESQEKKATALVRSDFQLMESLTSGQQNFVLSDPRLPDNPIVFATPGFYKLTGYSQEQVLGRNCRFLQGPGTNPKTVDIIRKAIATGSDCTVCILNYKADGTPFWNQFFVAALRDS…	Pennate	Bacillariophyta	Bacillariophyceae	Bacillariales
MATOU-v2.63520726_1	63520726	AIDPFHTALRPSRRIE*PNMTSEANGKADNGVPGNALNMFANSNLSAGDGEVSQIDLDELFRDCYFGQDASFPSAVPSDSGIDLVPPPPSVPASAASTPAAGGGVKRKAETQDVVKPEIGIMPSVSMYGDAGKIPSGSTKTLTAAQKVERRERNREHAKRSRLRKKFLLESLQGQIHGLQSEIEALTNIIRKELPDKADELLSTVNEKPKVAGAEKFTPLPMPSGFGPVKTLMEPDFRLMSALSSSQQNFAISDPSLPDNPIVYVSQGFLDLTGYTLDQVLGRNCRFLQGPGTDQSAVDIIRKGVREGVDTSVCLLNYKADGTPFWNQFFVAALRDAENNVVNFVGVQCEVSKATVERQNGALSK*VFYCLPPFIVNF*RKLTLKGKGCT*QCL*CIEK…	Centric	Bacillariophyta	Coscinodiscophyceae	Leptocylindrales
MATOU-v2.63576917_5	63576917	R*EIEYFIAPPIIEKTLIRSNSQAKLNFYCRRIHGRLIIRRSIYPFHITNHTHHLLSP*KTHPGLLLSSNPHLYHLFEIISSFSTSQHHLESASILYDFVNSSENIILHQHSSLYT**IQGTFQI*LVKMSENNIKDEAQGTATHAAAAAAVAPVSVPVQPQTQPPAPQAQVAPVAQIQHVQAPTFLAPLSSQTQHAIQTKGTPATLNLDDIFEDCFFTPDGDAVFLSETADSTDGAAGATAAMQGIQVSGESVVSNVASRPLATPAVAQVQPNPVVAATQAIPTTQPPVAPTPAPLAQFAPVPLGGGIATTGLLQPQGERATVMGETPLSSAPPKLTPMTAPPQQKHHLQYAIPATSIPKRRGTAASARERKMSDQQKTERRERNREHAKRSRIRKKF…	Centric	Bacillariophyta	Coscinodiscophyceae	Chaetocerotales
MATOU-v2.63579419_6	63579419	TLDQVLGRNCRFLQGPETDPKAVEKIRRSIEEGTDMSVCLLNYRVDGTTFWNQFFIAALRDAAG	Centric
MATOU-v2.63592484_1	63592484	DRRRERNRILARRTRLRKKFFFESLQKEVMELQRENAVLRDIVRTEVEGDEGRKLLEQCTAARQLPREVLEACGENPDLDQEDFNLVTSIQQSQHSFVITDPSLQDNPIVFASDDFLTLTGYSREDVLGRNCRFLQGVETNKEKLDQLRKGLAAGDDVSVTLVNYTADGTPFWNKLFIAALRDAQNNIVNFIGVVVKVASPEHGDPEFGKCIGENEKETTLDNQCDDVX	Pennate	Bacillariophyta	Bacillariophyceae	Bacillariales
MATOU-v2.63592836_2	63592836	TQLMPTTYTMSEAIGTTEAPAPSTTANGKEDDGPLPMFVPSAGEGEQEAEQQNLDLDDLFRDCYFGDFPVPDNNTSSPPAPLVPNSQFYSSQQPLTAVEVEPTAVGEKRKAEITLEEVTSFNQGSGAKKDGVSAKPLTDQQKVERRERNRKHAKRSRLRKKFLLESLQEQINGLQSEIESLKGIIQRECPDKAEKLLESITGPKGKFTPLPMPSGFGPVKTLMEPDFRLMSALSGSQQNFAISDPSLPDNPIVYVSQGFLQLTGYTLDQVLGRNCRFLQGPGTDQSAVDIIRKGVREGVDTSVCLLNYKADGTPFWNQFFVAALRDAENNVVNFVGVQCEVSKATVEKQMAAQKEKEKTEQEGQGDAK*EKGAVKEVYRWPVLIQIFNI*SKTKGVKSS…	Centric	Bacillariophyta	Coscinodiscophyceae	Chaetocerotales
MATOU-v2.63593673_1	63593673	RKSCSTAFLIIDPLYSNSTYILSK*SGLYLRRNEATITKQKASTNTMAMTMSSSSVTLPRFVSASTAGEGTSGALGEGDDMFSSLMNGDADFDLLAEYLLEDSGGAGGSAFGGGNAVLDIGNTPSANATTVSVGASSNSDMEGLDADPLADAAAAAAAGSDVKTNGVSDLAMNLQQIQSMFANKKGQGSAAIDNKKANVKPQSKNAVPNATTSLSATSGKRKHAETSAEVMPATIPMISAVRTSVNSSAVNNNRSQRQKSQAQIDRRRERNRILARRTRLRKKFFFESLQKEVTDLQRENTILKEIVRSKIRPPAKAMEVLEECKSKDEIPSIVFENVLGSNDIDKQDFSLVQSLQGSQQCFLITDPSLQDNPIVYASGGFLSLTGYTREEVLGRNCRF…	Centric	Bacillariophyta	Coscinodiscophyceae	Leptocylindrales
MATOU-v2.63604556_4	63604556	RS*SSYILINAD*LLFHTITVMLEAPIAMNANSFSLPCFIPASKAQKTEPTENSIFTEDQLDFDLLAEYLLEDSAGAANTGFDFNIETPPATEQQQPVVSVTPDTNFESFQDSAINVSVNTNNWKLKDEPTQAIRTQGTMTNNQSLLAPAPSPLPLPSSLPTIPLSIKPPSPQLIPMLAQTNNVPAQTMVVHQHKRPRIDVGTQQQQIQAPSTSNATTNQLLPGNNTILPQILAPRGGRQKSQAQIDRRRERNRILARRTRLRKKFFFESLQKDVIDLQKENMALKEVVRTHIKVDEAKNILGDCNATEKLPSIVLEHCGCPTDLAQKDFNLVNSVQKSQQCFVITDPSLQDNPIVYASNDFLTLTGYSREQVLGRNCRFMQGNDTDPNKVAKIRKALS…	Centric	Bacillariophyta	Coscinodiscophyceae
MATOU-v2.63604637_2	63604637	ANEQLPSCVIEQCGDMSNLDKQDFNLIQSIQKSQQCFVITDPSLRDNPIVYASQDFLSLTGYARDDVLGRNCRFLQGPETSQVKIKQIREAVTAGSDVTVTFVNYTADGTPFWNKLFIAALRDAQNNIVNFIGVTVKVAGPEAGDIEEGKKLQIETPEENGQKDADGNTTLDNFDTDVPKLP*K*TLKYKFYHSPKQINQDKHIILLIYVNGFIFVYFTQ*FENILHAFLNRTFEFTRX	Centric	Bacillariophyta	Mediophyceae	Hemiaulales
MATOU-v2.63612872_3	63612872	SLPDNPIVYVSQGFLDLTGYTLDQVLGRNCRFLQGPGTDQSAVDIIRKGVREGVDTSVCLLNYKADGTPFWNQFFVAALRDAENNVVNFVGVQCEVSKAVVEKQMLEQQNASGKDDAAPDPTAP*FFQLR*MNFWVFLVQG*DDMIWRRN*NGEVNMYMISVDVGKPDHTNLTQNVICYYSE**HN*LCCLLDLRIWREDVK**YC	Centric
MATOU-v2.63648667_4	63648667	AKIAKQVLDTCKANEELPSVVLEHCGDPSAMNGQDFNLMSSIKKSQQCFVITDPSLQDNPIVYASDDFLTLTGYTRDQVLGRNCRFLQGSETDKGKISSVSKAVNNGDDVTVTFINYMADGTPFWNKLFIAALRDAQNNIVNFIGVSVKVAGPDPSDHEFNKPLPGESITLDTAEDSLDYKEDITVDADAAVMAIEGAVTAR*CRSDGDRRRCDSCSSSWHT*CDCPKIILKDIC*LAQDLRDKSNLPISLYLSFKF*TIITFNYRIRTA	Centric	Bacillariophyta	Coscinodiscophyceae	Chaetocerotales
MATOU-v2.63701532_1	63701532	EEGGLIADSSTSANKVLDDPDFRFIKALQTAQQNFVVTDPSLPDNPIVYATQGFLNLTGYTLDQVLGRNCRFLQGPX	Centric
MATOU-v2.63764553_4	63764553	CVP*G*KWIIRRPLGR*YVCN*TF*TNSPGNQSRRTEDASSFELKCC*RSNPFSPSSTRSWYGNASNSTRYRTNASSTIWADYDCTPA*ASSDPCTVDFCVHQHKRPRIHAPSTSVPSTQVRSVPMMSNIVVPQRGGRQKSQAQIDRRRERNRILARRTRLRKKFFFESLQKDVTDLQKENMA	Centric	Bacillariophyta
MATOU-v2.63829072_1	63829072	VIRTAVANGTDATTCILNYKADGTPFWNQFFIAALRDSDNCIVNYVGVQCAVDSNAGASALEDKVNSVLPLQNRX	Centric
MATOU-v2.63849689_6	63849689	KEENEKLRDSIREHLGNEKAEQLLNSSGGGESPDAALIASSQGAANKVLDDPDFSFIKALQTAQQNFVVTDPS	Pennate	Bacillariophyta	Bacillariophyceae	Bacillariales
MATOU-v2.63861242_6	63861242	QNNVMTGPPGGSALSGRLGFNVVGGQLTMPQKTEQSLPEDNKIVTTPGGVNLPVGIGIRLGSVVPNVAATGGVTLNHTHWGAGSNIAANKGGIADKSKGGLINTGPGGVSEQAMAERRLRNREHAKRSRVRKKFLLESLQQEVRELQKA	Centric	Bacillariophyta	Coscinodiscophyceae
MATOU-v2.63868451_5	63868451	SLQQSVALLKEENESLRSSIRTHLGEEQSNQLLTKKNLEEQSEAAAAAGLIASDANNANKVLDDPDFSFIKALQTAQQNFVVTDPSLPDNPIVYATQX	Centric	Bacillariophyta	Coscinodiscophyceae	Rhizosoleniales
MATOU-v2.63879245_6	63879245	IVRTEVQGEEGRELLEQCNAARKLPREVLEACGENPDLDQEDFNLVTSIQQSQHSFVITDPSLQDNPIVFASDDFLSLTGYSREDVLG	Pennate	Bacillariophyta	Bacillariophyceae	Bacillariales
MATOU-v2.63932440_3	63932440	ASLTSGQQNFVLSDPRLPDNPIVYASEGFYQLTGYSREQVLGRNCRFLQGPGTDPRAVDVIRTAVANGTDATACILNYKADGSFERFGQLHCQLCWSAMCC*S*SRSISFGRQS*FGIATGGQRGCR*WFNKQIKEHTRTYCTSHHLEDNAM*CYE**EQVWWPKWLGGEGMK*REFISL*IKTI*MSKSIKIKQARSSEYNTEIDDTR*WRNRFAYFMLDQKAR*TINVNFRFRD	Centric
MATOU-v2.63933183_4	63933183	TDATACLLNYKADGTPFWNQFFVAALRDSDNCIVNFVGVQCAIDPGAGASALEDKVNSVLPLATKDGAERK*CGDRISTY*GMFIDDISHELL*WAHEVATDLHAKRKFHSTL*HFRRVEE	Centric
MATOU-v2.63969367_1	63969367	PDFRLMSALSGSQQNFAISDPTLPDNPIVYVSQGFLELTGYTLDQVLGRNCRFLQGPGTDQSAVDVIRKGIREGVDTSVCLLNYKADGTPFWNQFFVAALRDAENNVVNFVGVQCEVSKAVVDKQMAEKGYGIKDGKS*NYKRRX	Centric
MATOU-v2.64002741_2	64002741	FWNQFFIAALRDANGNITNYVGVQCKVSDQYAANVLKKQEEGVKSYEDEDMEEDGPLDDPVNSTDTGAPDMGQVAQ*	Centric	Bacillariophyta	Coscinodiscophyceae	Leptocylindrales
MATOU-v2.64006616_4	64006616	GFGPVKTLMEPDFRLMSALSGSQQNFAISDPTLPDNPIVYVSQGFLDLTGYSLDQVLGRNCRFLQGPGTDQSAVDVIRKGIKEGTD	Pennate
MATOU-v2.64030096_4	64030096	DDADLDDNGGTKELTAKQKLERRERNREHAKRSRLRKKFLLESLQEQIHALQEQMEKMKGAIKTELPHKAD	Pennate	Bacillariophyta	Bacillariophyceae	Bacillariales
MATOU-v2.64035955_6	64035955	AQQNFVVTDPSLPDNPIVYASQGFLNLTGYSLDQILGRNCRFLQGPETDPKAVERIRSAIEQGNDLSVCLLNYRVDGTTFX	Pennate	Bacillariophyta
MATOU-v2.65991055_2	65991055	HGAIEEGSDMSVCLLNYRVDGTTFWNQFFIAALRDAGGNITNYVGVQCKVSDQYAASVCKKQEEADAAAAAGGSTAGLKQES**AASTLWEKHIPQLLQEMLQTPIMETDV*LFKAVSWEKAVTAFIC*KFPKSSTFSFNFIWLSFSIGGTHVE*YSVAAQ*KILRL*VLALNHIESEKDFESYENLIHLSCVNCTGFWGERPM*YIFLTV	Centric	Bacillariophyta	Coscinodiscophyceae
MATOU-v2.70818498_2	70818498	YKEAKDTHKRHFWN*VIMSVVLNNNMFSLPCFSSASSYGKSTATSTSNDEPTTNNNSSNLISSIQNQLFDSASDQDFDLLAEYLLDDGTLETTPTSGMNLEGYVGLSTTTTTEPAADSSNLYQQAASEAQKSIQATVTNLISQHIEGSDLSKYQQREQKQATQQQQPPTPLLHPGSALLAPSSVFPQANTAPPQAASAVTTNANAATIVHHQHSTTTQNAAVPTAGQKRDIDKAVSSSSNRPSQRTKSQAQIDKRRERNRILARRTRLRKKFFFESLQKEVMDLQRENYALKEIVKKNFEAVEGKNLLSECKVGDLPSILSSGDASSYGENNDMDDTDLTFISSVKKSQQCFVITDPSLHDNPIVFASEDFFTLTGYTREEVLGRNCRFLQGMDTCPTK…	Centric
MATOU-v2.70849895_2	70849895	QAQQQQQAAHQQQQQHQIAVSHQQQLAANAAAAVAQQQLSLPTGQGIKTAWHAGSLPAMQQQQQPQQGNTNMISIQQPPAKRSKGEELFLPNPQQQQQNNIAGIGAVGAGAGNTAIAQQQLALAQAASGVGALSGRLGVALPNHNGAGVGGNVNNMMGQQQKSILQTQQQQQQVPPHQQVAAQGINLPIGMGVKFNHMGNIIPQGQAGVASIAAINAGSMVMNNLASVAMGGNPMTAATAQGILSATAHPSAASSMQPGALATAQPSLPGEDGMAAERRLRNREHAKRSRVRKKFMLESLQEQVRGMQKENSTLRMLVQKHIPTKALKIIDDCCSKSVLFGTGEEGGQLEGMDDPQDKKEGNVRGGEGESTTPQQPLLRSDFSLIESLTSGQQNFTLSD…	Centric	Bacillariophyta	Coscinodiscophyceae
MATOU-v2.70859927_6	70859927	CRFSPLNWFSPTISTHSKLVKERNREHAKRSRIRKKFLLESLQQSVSLLKEENEKLKSAIRNHLGDKEADNLLSKQALADAAGAGGGLIASNSADANKVLDDPDFSFIKALQTAQQNFVVTDPSLPDNPIVYATQGFLNLTGYTLDQVLGRNCRFLQGPETDPKAVEKIRTAIEEGSDMSVCLLNYRVDGTTFWNQFFIAALRDAGGNITNYVGVQCKVSDQYAANVCKKQEEADMTAAASEVDGAGLKQES*WRNYNFK*TLPKRGGFQVLARNNVAAQQT*YFVHETFTHLVFIQLTIKGSGIHVEAKITILASYIPLGLQTCLL*VLLNRSYSPKRLKMHPNLTGARKGLVMSEEVSSTSRIAANAAHSLFPQLHHVX	Centric	Bacillariophyta	Coscinodiscophyceae
MATOU-v2.70863210_6	70863210	SVATGTTNAGASAMQLFAPGPNAGSEHDPLELDELFHDCYFGDFGVPEAVTSLSAPLVAPAPVAPIIAPNPAVKRTAVQAGLATTPTPTATVAPVPETKAPAAASAAPSSLAPVATPASVRSSSASGAPVGSLVPAASLTESQRKERRDRNREHAKRSRLRKKFLLESLQEQIEGLQSEIHSLKDIIRRELPGKAPDLLRGFGDGEGDKDDPSHPKKGAYTPLPMPSGFGPVKTLMEPDYRLMSALSGSQQNFAIADPSLPDNPIVYVSQGFLDLTGYTLDQVLGRNCRFLQGPGTDQAAVDIIRKGVQEGVDTSVCLLNYKADGTPFWNQFFVAALRDAENNVVNFVGVQCEVSKAVVEKHITEGKTPASAMPGS*NWGSALFLMPGQRKDKTKEMHV…	Centric	Bacillariophyta	Coscinodiscophyceae	Thalassiosirales
MATOU-v2.70887313_5	70887313	RSRCIQLHPT*RNPNLKHCSFKTK*ADSTLPAPAIRSPCRRRLQHMNRVTATREPCSSSHPIRMRRQITPSLT*TSSSVTATLATFPCPRWCRAPRRCWRPTSLSPLLRGQRGRLA*KKRQPAATRASRSSMMKAGASKSSYEQKPVEKGLSARPTASLSESQKVQRRTRNREHAKRSRLRKKFLLESLQEEVEGLQGELSALKSIIRRELPSKAAKLLRDAGSGPDSDDCPGLPMPSGFGPVKTLMKPDYRLMSALSGSQQNFAISDPSLPDNPIVFVSRGFLDLTGYTLDQVLGRNCRFLQGPGTDQAAVDTIRRGVKEGVDTSVCLLNYKADGTPFWNQFFVAPLRDAEDRVVNFVGVQCEVSKAVVEKHITEG*AE*SILPAIWGVLQLF*WHLG…	Centric	Bacillariophyta	Coscinodiscophyceae
MATOU-v2.71221926_2	71221926	SGKLTDQQRLERRIRNREHAKRSRLRKKFLLESLQDQIHGLQTDIEKLTSLIKKELPDRAAKMLQELELSNGTADSNEERSMYKPASMYKPLPMPSGFGPVKALIEPDFRLMHSLSNSQQNFAISDPSLPDNPIIYVSQGFLDLTEYRLDQVLGRNCRFLQGPGTDQAAVEVIRKGMAEGIDTSVCLLNYKADGTPFWNQFFIAALRDANNKIVNYVGVQCEVSKAIVESHLEQIQCEDEGS*LVLX	Centric
MATOU-v2.71248064_3	71248064	DRRRERNRILARRTRLRKKFFFESLQKDVADLQRENAALKGIARSRLPPAAAAELLRGCTAASRLPSAAVAGEIAAAQGTDPGAKATGTAGTALVKDDFSLVRAVRHSQQRFLITDPSLHDNPVVYASDGFLEMTGYKRDEVLGRNCRFLQGTGTDPAKVGEIRKAIARGEDVDVTLVNYRADGTPFVNRLFVAALRDAENNIVNFIGVIAEVPGGDGPK*GPGIDVPHVHASDTLPPKTSLSCLEVRNTGSIKGN*SIHKHCHHACSDSCSARLWVSRQFSVTISLSASVRGAGGWEAGSQKNKPNKT	Centric
MATOU-v2.71964878_4	71964878	FWNQFFIAALRDASGNITNYVGVQCKVSDQYAANVCKRQEEEEDTPE*TPHEKKYVYANQCLLYLNRLMHTRKSQLEIGFLKRHYQNILSLRHNGRW*IRGLFFEGMVLLHMNITILSILGYSIIT*IMKDICLLVFGHATGYKP*	Centric
MATOU-v2.72045724_2	72045724	FSFIKALQTAQQNFVVTDPSLPDNPIVYATQGFLNLTGYSLDQVLGRNCRFLQGPETDPKAVEKIRTAIEEGSDMSVCLLNYRVDGTTFWNQFFIAALRDAGGNITNYVGVQCKVSDQYAASVCKKQEEVDIAAAAAAAAKANSAGLKRKADEAP*HLSCLCFES*HLGIHKDFCGSTTKTFAHLVFIETLSGFASRYLVSIGRLRYAVWH*GGHHQRPSKNVPDQITLSKEPWKSRY*LHKYICLDPNKLVQR*TYVSDLISVLHWCVTAKYWKIV	Centric	Bacillariophyta
MATOU-v2.72683080_4	72683080	VATPSPSPSPEPKAVADDATAKVSKSRKRPAEEDDDGERTKQLERRVRNREHAKRSRLRKKFLLESLQDQIYVLQDQVKKLKKVIREELPDQ	Centric
MATOU-v2.72810568_5	72810568	RSNYSVKPVWQTRFSNGHNPCAGSCSDCCSIQACSTATASSTICYSRNNECC*KAESWIKKLRS*NV*TTEG*AQRA*P*TCQKIAYS*KISSRISSTISNFTER*ERKTSLSYPLLGEAEADELLNKKIGSGEAGLIANSSVDANKVLDDPDFSFIKALQTAQQNFVVTDPSLPDNPIVYATQGFLNLTGYTLDQVLGRNCRFLQGPETDPKAVEKIRRSIEEGSDMSVCLLNYRVDGTTFWNQFFIAALRDASGNITNYVGVQCKVSVRGKRKKIVLLLNRKTRQRQDIICICNIIFRCISIGYCARPNHS*SRFSTKA*SSACLL*RHIIQRFNFGASF*RKSSVT*TLSTELWGLFRGSK*SISLFSYL*TCDX	Pennate	Bacillariophyta	Fragilariophyceae	Thalassionemales
MATOU-v2.73210735_4	73210735	TSKYTYLTYGCYYK*LLLKRCKTTH*EAEGSKKGT*PKTC*AKQAKKKVLTRKFAGTN*WITGRTRGLERNCTERMS*QS*QTY*VCDQ**R*ICSTEDKYTAQPMPSGSGPVQTLMEPDYRLMKSLTGSQQNFAISDPSLPDNPIVYVSQGFLDLTGYTLKQVLGRNCRFLQGPGTDQAAVDVIRKGVREGTDTSVCLLNYKADGTPFWNQFFVGALRDAEKNIVNYVGVQCEVSKAVVDTQTLKI*LDYYCNKSTMTTGRGTLISFDFISNVLVTSNVNFILNSK*H	Centric
MATOU-v2.73221346_3	73221346	SLQKEVMELQKENAALRDIVRTEIEGEEGKALLEQCNAARKLPREVLEACGENPDLDQEDFNLVTSIQQSQHSFVITDPSLQDNPIVFASDDFLTLTG	Pennate	Bacillariophyta	Bacillariophyceae	Bacillariales
MATOU-v2.73221347_6	73221347	SDDFLTLTGYSRDDVLGRNCRFLQGTNTSKEKVDLIRKGMANGEDVTVTLVNYTADGTPFWNKLFIAALRDAQNNIVNFIGVIVKVASPEPGDPDFGKPLGTENEKNENSQGEADGMVMAIEGAVDAAVA	Pennate	Bacillariophyta	Bacillariophyceae	Bacillariales
MATOU-v2.73268283_3	73268283	KKFLLQNLQEQINSLQSELKALQDVIRKECPDKAEQLLESVSGPKGKFTPLSIPSGFGPVKTLIEPDYRLMTALSGSQQNFAISDPSLPDNPIVYVSQGFLELTGYTLNYVLGRNCRFLQGADTDQGAIDIIRKGIKDGVDTSVCLLNYKADGTPFWNQFFVGALRDAENNVVNYVGVQCEV	Centric
MATOU-v2.73314306_6	73314306	PIRQLH*FLISNFINKHLSNNHNSHSSYSSKVHCH*RERLKIPQW*LKQNPHLYLYRHPMATRQPPVFVPSSNGNETTTVKKTTTKPLTETQKVERRTRNRKHAERSRLRKKFLLQNLQEQINSLQTELHSLQSIIKRECPEKADQLLESVCGPKGAFTPLSIPSGFGPVKTLIEPDYRLMQSLSGSQQNFAISDPSLPDNPIVYVSQGFLDLTGYTLDYVLGRNCRFLQGADTDQGAVDTIRKGIKDGVDTFVCLLNYKADGTPFWNQFFIGALRDAENNVVNYVGVQCEVSKAVLINK*PRVKCNYPVS*TGKGQIFS*CP*MLQWRGDDIILKKTCCIITSLSF*VEKLNHTFCHLICRE*LYNDFHMGLKYSK*ILSLCLC*X	Centric
MATOU-v2.74304786_2	74304786	ADLQRENAALKSIVRSRLKPGDARSVLDQCDAHKKMPGDVRSSQFKENDGTNLAGAAPDGGSSVKKLDREDFSLIQSIQNSQQCFIISDPSLHDNPIVYASDDFLRLVGYSQDEVLGRNCRFLQGTETCQEKVAQIRKAVAAGEDVSVTFVNYTSDGKPFWNSLFIAALRDADNNIVNFIGVVVKVSAPEKDDPEYGKVLKC***RRQVEVPSQDSKFTIGKX	Centric	Bacillariophyta	Coscinodiscophyceae	Thalassiosirales
MATOU-v2.74360093_3	74360093	LIDVSTVDYRQTAGTSLPSAGGDAASGAPAPSQVQQTSSVMAAAQPAVSAVTNQTVVPTVLQQPVIAPPPRPASTTNAGAAATVSNQLPAMRQPQPVAPTKAPVAQPPRPTAVSAPSSNQSNKRPRVSGSSQSSTMAKASAYSFAGSNTTTLATAAMAAQINKAHPMPPAPPTDSRSGEKSQAQVDRRRERNRILARRTRLRKKFFFESLQKDVADLQRENAALKSIVX	Centric	Bacillariophyta	Coscinodiscophyceae	Thalassiosirales
MATOU-v2.74635261_6	74635261	PSKVDGLLASSQGIANKVLDDPDFSFIKALQTAQQNFVVTDPSLPDNPIVYASQGFLNLTGYSLDQX	Pennate	Bacillariophyta
MATOU-v2.74808664_2	74808664	GQQQQQVYQPQLSQQQKQKKTGNYNTTQYLNDIFGDCFFTPNGEAVFLSEQSENIILPGNETTPAAVASLVSEDGTAIPFNNGGGLSTTNLDKPGLPATVMGTASVGVTEQQQQQQQQHLALPFVQPPQRDNHLGFAIPNTGSYTAPSNGRTTSRRERKMSEQQRNERRERNREHAKRSRIRKKFLLESLQQSVSLLKEENQKLKDSIVSHLGKEVGEELIDPKNLQKIGESFNPPAGSNPADSISANKDNIIANHANEANTVLDDPDFNFIKALQTAQQNFVVTDPSLPDNPIVYATQGFLNLTGYTLDQVLGRNCRFLQGPETDPRAVDKIRYAIESGIDMSVCLLNYRVDGTTFWNQFFIAALRDANGNVTNYVGVQCKVSDQYAAAVCKRQQEGQ…	Centric
MATOU-v2.74823768_2	74823768	PPE*LLSLFFDTLYK*NQRKLDRNL*SRTREEGKKIIVLKEIILHFYFVKNTFFFSV*LIMSLVCPNMFPPLPCFTAASAYGGNSATTTNGDGTSAEATGSNTNIITTIQNQFFDSANDQDFDLLAEYLLDDGSLNATPTSEEQSTGYLDVGAVTTVAASNDTSSDPLLDVNALYQKAASEAQKQVQTSVTNLISQQLEGNNLLAMQQQQQQQNLQQQSPAPLLHPGATLVSPTTVFPQAKVTPQAVPVSKNATVVHHQHSNPQSNISVSSGYKRSIESASFTQISSNRPNQRVKSQAQIDKRRERNRILARRTRLRKKFFFESLQKEVMDLQRENYALKETVKKNFETDKAKDLLSECKVGDLQSILSSSDMCNENTDMEDVDLNFISSVKKSQQCFV…	Centric
MATOU-v2.74828305_6	74828305	TISASIVEPSPPPNALDLFVPAEGNNVEYNQNPDIQIDDLFHDCYFGELLTSGVDPNEAISVVSSTVATPAIPMPASVVPVAPNTAIPDVVSSSTTAAGTATTTNSVLPVKRSFTANGTSQSDLTLYNNSNATFRNDPPSSTHNLTDQQKLDRRVRNREHAKRSRLRKKFLLESLQDQIHGLQADIDKLTSLMKRELPDKAATLLAELKLSSGCTASKSEQNMYKPLPMPSGFGPVKTLIEPDFRLMHSLSNSQQNFAISDPSLPDNPIIYVSQGFLDLTEYRLDQVLGRNCRFLQGPGTDQAAVEVIRKGMAEGIDTSVCLLNYKADGTPFWNQFFIAALRDANDQVVNYVGVQCEVSKAVVESHMEKLGGATVX	Centric
MATOU-v2.74886485_6	74886485	LVCSLKKSQQCFVITDPSLQDNPIVYASDDFLKVTGYSRDEVLGRNCRFLQGTDTNPEKVEMIRKSLLEGEDVRTCFLNYTADGTPFWNQLFIAALRDTQNNIVNFIGVIVKVAGPPPDDIEYGKQETADTEVKPEGDEVNEEEVVGGVSDVVNQNAVPLLTP*SM*ELPFLKARFSCPIMNYLITFFWRIENCSNFP*SNFCLIFSTKFYLSPFQYSVYS*QNSGQCSDFRIRSIQQRGX	Centric
MATOU-v2.74891521_3	74891521	KKSQQCFVITDPSLQDNPIVYASDDFCKITGYARDEVLGRNCRFLQGTDTNPEKVEMIRKSLLEGEDVRTCFLNYTADGTPFWNQLFIAA	Centric
MATOU-v2.74942960_1	74942960	YHHAVPPSTGNKRPYPDVAANSSVSKGTLSRQVDCVQDPPGGKKQKNQAQIDRRRERNRILARRTRLRKKFFFESLQKEVTDLQRENTVLKEIVKAKLDAEVAX	Centric	Bacillariophyta	Coscinodiscophyceae
MATOU-v2.74961937_2	74961937	NPIVYVSQGFLDLTGYTLDQVLGRNCRFLQGPGTDQAAVDVIRKGVQEGTDTSVCLLNYKADGTPFWNQFFVAALRDAEDNVVNFVGVQCEVSKAVVEKHISEX	Centric	Bacillariophyta	Coscinodiscophyceae
MATOU-v2.74975624_6	74975624	TQGFLNLTGYTLDQVLGRNCRFLQGPETDPKAVEKIRNAIEEGSDMSVCLLNYRVDGTTFWNQFFIAALX	Centric	Bacillariophyta	Coscinodiscophyceae
MATOU-v2.75321595_2	75321595	YLNDLFGDCFFTPEGEAVFLSEEADKDNIVASSETTPATVASRIIDDGSSVSVSMAGGIAATNLDKPGFPATVMGPATATSATTAPIPFVQAPQKENHIGFATLPASSSATGRATKSRRTRKMSEQQQNERRERNREHAKRSRIRKKFLLESLQQSVQLLKEENEKLKYSIKIHLGEDTANKLLAPEHLQSISSSLASSGAVGAAPTMLTGQSGKDGILATGKEEANKVLDDPDFNFIKALQTAQQNFVVTDPSLPDNPIVYATQGFLSLTGYTLDQVLGRNCRFLQGPETDPKAVDKIRKAIEDGVDMSVCLLNYRADGTTFWNQFFIAALRDASGNVTNYVGVHCKVSDQYAATVCKRQHELADVAEEEEDN*L*PCCIYLHSHLMLPCSAYTCSIF…	Centric
MATOU-v2.75321596_2	75321596	YLNDLFGDCFFTPEGEAVFLSEEADKDNIVASSETTPATVASRIIDDGSSVSVSMAGGIAATNLDKPGFPATVMGPATATSATTAPIPFVQAPQKENHIGFATLPASSSATGRATKSRRTRKMSEQQQNERRERNREHAKRSRIRKKFLLESLQQSVQLLKEENEKLKYSIKIHLGEDTANKLLAPEHLQSISSSLASSGAVGAAPTMLTGQSGKDGILATGKEEANKVLDDPDFNFIKALQTAQQNFVVTDPSLPDNPIVYATQGFLSLTGYTLDQVLGRNCRFLQGPETDPKAVDKIRKAIEDGVDMSVCLLNYRADGTTFWNQFFIAALRDASGNVTNYVGVQCKVSDQYAATVCKRQHEIAHVAEEEEDN*LLPCCIYHNSHLMLPCSAYTCSIF…	Centric
MATOU-v2.75404088_1	75404088	RRTRLRKKFFFESLQKDVADLQRENAALKSIVRSCLKPDDAKMILDSCDAQHKMPSAVQSQTAQPHLFMKENQTNITCRDDSSVRKLDREDFSLIQSIQNSQQCFIITDPSLHDNPIVYASDDFLKLTGYSQEEVLGRNCRFLQGTETCQNKVAQIRKAVAIGEDVNVTIVNYTSEGNPFWNSLFIAALRDADNNIVNFIGVIVKVIAPEPGDSEYGKILK*M*DVSQEEHHKANTA*ASNKFVCTRVGRRKEKFYCF*EDATE*ISHYRL	Centric	Bacillariophyta	Coscinodiscophyceae
MATOU-v2.75423454_3	75423454	QTTVQVPSTTISGYKRPAPTNNTTTQPQRPNQRYKSQAQLDKRRERNRILARQTRLRKKYFFESLQKEVMELQYENLALKQIVKQNFTGKEDVKNQILDECKLSENLLSQTHKLSKEEEQQNDCTEDNNDSSSSDKKKLEDVDYHFICSVKKSQQCFVITDPSLYDNPIVYASDDFYALTGYSRDEVLGRNCRFLQGKDTSKEKILLMKNAIGRGEDVGVCMVNYTADGTAFWNQLFIAALRDTQGNVVNFIGVLVKVNSPPKDDPEYGKVLVNDPNEKTTEIQQQQLTEENTTTPTNNNAPDATITVTTLPNHENNNNDNNNNVDELLGAATAAVSAAEAACTTDNVLTHNVISSTIDNNTQQQQQQQQQHVNNTNPATTIA*X	Centric
MATOU-v2.75495720_6	75495720	TWAGVDTSVCLLNYKADGTPFWNQFFVAALKDANNNIVNYVGVQCEVSKAVVESHLEHLNDEKGKAVVSGGNVVAGG*CLX	Centric	Bacillariophyta
MATOU-v2.75527468_2	75527468	LRYTGILKFNWIYLRPSIREEL*VFTRP*N*SQSS**NSLCDRKWYRYVCLFVELSC*WHYFLESILHFDGTTFWNQFFIAALRDANGNVTNYVGVQCKVSDQYAAAVCKRQQEGQEEGNESPAQAQTTNDDQRPPSTDAAATAAAPAQDKSN*FNFS*HVQLPPQYQIIA*FSX	Centric	Bacillariophyta
MATOU-v2.75542718_5	75542718	ETDPKAVEKIRNAIEDGSDMSVCLLNYRVDGTTFWNQFFIASLRDAGGNITNYVGVQCKVSDQYAASVCKKQAEADVMVEKAQAACSLKSG*FGGETYMVNRVAKKIQGCHEN*WKLIFTALGLSDGCRG*IGLSFLSELMYCLCLQLL*CILALFIMGRRNDNTEDNGSFLSX	Centric	Bacillariophyta
MATOU-v2.75624875_2	75624875	AQIDRRRERNRILARRTRLGKKFFFESLQKEVMELQRENAALRDIVRTEVEGEEGQKLLEQCTAARKLPREVLEACGENPDLDQQDFNLITSIQQSQHSFVITDPSLQDNPIVFASDDFLTLTGYSREDVLGRNCRFLQGAHTSKDKIDQIRKGLATGDDVSVTLVNYTADSTPFWNKLFIAALRDAQNNIVNFIGV	Pennate	Bacillariophyta	Bacillariophyceae	Bacillariales
MATOU-v2.75660616_1	75660616	DQVLGRNCRFLQGPGTDQAAVEVIRKGMAGIDTSVCLLNYKADGTPFWNQFFIAALRDANDQVVNYVGVQCEVSKAVVESHMEKLGGATV*FSHLSFSMNLI*IIFLYX	Centric	Bacillariophyta
MATOU-v2.75678386_2	75678386	DTKTVEIIRKAVAIGADCTVCILNYKADGTPFWNQFFVAALRDSDNNIVNYVGVQCEVEPEAGASVLEDRVNEV	Pennate	Bacillariophyta
MATOU-v2.75702683_6	75702683	RKGVQDGVDTSVCLLNYKADGTPFWNQFFVAALRDAENNVVNFVGVQCEVSKAVVEKHISEGKTPASAMPGS*KLGYSFLSDTKVNKETGMVLQRQRSITT*DVHNTR*KPKAVCVVRQKMEQSKV*NLSFCX	Centric	Bacillariophyta	Coscinodiscophyceae	Thalassiosirales
MATOU-v2.76135306_2	76135306	NAIEEGSDMSVCLLNYRVDGTTFWNQFFIAALRDAGGNITNYVGVQCKVSDQYAASVCKKQEEADAAATAAVTGAANX	Centric	Bacillariophyta	Coscinodiscophyceae
MATOU-v2.77115001_1	77115001	LGRNCRFLQGTNTSKEKVDLIRKGVATGEDVSLTLVNYTADGTPFWNKLFIAALRDAQNNIVNFIGVIVKVASPEPGDPDFGKPLSVENENKEQSGGX	Pennate	Bacillariophyta	Bacillariophyceae	Bacillariales
MATOU-v2.78729168_6	78729168	TWEGFLNLTGYSLDQILGRNCRFLQGPETDPKTVERIRNAIESGDDLSVCLLNYRVDGSTFWNQFFIAALRDAAGNITNFVGVQCKVSDTYAASVIKEQQREEEERAQAQKEAAAAQQQQQAEQQQQPPX	Pennate	Bacillariophyta
MATOU-v2.78732250_4	78732250	LESLQQSVAMLKEENDKLRDSIRQHVGEEQAEKLLEQKMDGSNGDMRLTTSSQGAANKVLDDPDFSFIKALQTAQQNFVVTDPSLPDNPIVYASQGFLNLTGYSLDQILGRNCRFLQGPETDPKTVERIRNAIEQGSDLSVCLLNYRVDGSTFWNQFFIAALRDAAGNITNFVGVQCKVSDTYAASVIKEQQKEEEEKAQAQKEAAQQQQQAQQQAQPPSQPPAQPPTQPPAQPPAQPPQPMQ*EEHQAISQILSSADRQTLFFM*PLASHQSQQNFLHLRTCARIYSFIHQRG*FIHSSVRLAKPHVHSSTTEQRRRLF*LFEGDFFYHVLY*YKGQIDRGGKYLTITISTSKSILVF	Pennate	Bacillariophyta	Bacillariophyceae	Bacillariales
MATOU-v2.78745340_3	78745340	GSTNGTTKLRRTDPSLPDNPIVYASQGFLNLTGYSLDQILGRNCRFLQGPETDPKAVERIRNAIESGHDLSVCLLNYRVDGSTFWNQFFIAALRDAAGNITNFVGVQCKVSDTYAASVIKEQQKEEEDQQQQQDGATGDVQ*KQKCGKNTRPM*ILKKST*YMKTLQX	Pennate	Bacillariophyta
MATOU-v2.78746861_5	78746861	YFISEFENPVNAYTNAMGNYVAGPGSVPAPAAANAAPAPIAYAPAPATVQHAQQPVVSSGIRTPYHSAVAAPAPAVATLQPQQQQVQGIGVPVAKRAKLEPGATKPTTLTANVAATGGVTSRLGFTAGHLQTGVQGGTALPIGGARSGILPAGVPGSMALSQQQQQGTFTQHQQQGTGVTLPVGRGIRLGGAGGVAPATARKVPGVGGMIWGGPQMMGMSDQAVAERRQRNREHAKRSRVRKKFMLESLQEQVASLQRENQRLRMLVQDNIPEHAQMIISECCTSSPLFGDTDSSNGQEGTEDENAEGKSKKTALVRSDFQLIDSLSAGQQNFVLSDPRLPDNPIVFATPGFYRLTGYTPEQVLGRNCRFLQGSGTDPKSVDIVRKAIQSGSDCTVCIL…	Pennate	Bacillariophyta	Bacillariophyceae	Bacillariales
MATOU-v2.78798265_2	78798265	AIAPAIAGDPAASAGIVATPAQPVAVPSTTAPVPADSKKRAADAITGGTAGQLTAKQKLERRERNREHAKRSRLRKKFLLESLQEQIHGLQEQLEKFKKKIRTEIPAPKAEQLIDEICGHENKYTPLPMPSGFGPVKTLMEPDFRLMSALSGSQQNFAISDPTLPDNPIVYVSQGFLDLTGYQLDQVLGRNCRFLQGPGTDQSAVDVIRKGISEGIDTSVCLLNYKADGTPFWNQFFVAALRDAENNVVNYVGVQCEVSKAVVEKHMGKEKK*TISIIFQMYFDLISNVYAYKSMVKANPAGE*FL*NR**FSKQSASRDEFVRSGRRCLNNLEKCRRNQASFS*SSTCCSNIQALVNI*CHMSYX	Pennate	Bacillariophyta	Bacillariophyceae	Bacillariales
MATOU-v2.78829977_1	78829977	APTVSTFPALPTPIPHVTSSQGMVVNHHAPPPVTVTIVGNKRRRLDGSTQSVTATQSLGNGQFVSNTTMVGRGRQKSQAQIDRRRERNRILARRTRLRKKFFFESLQKDVIDLQRENVLLKELARKKLPPEVSKKLLSECKAMEKLPSAVQEAVGESATDMNSQDFNLVQSIQRSQQCFVITDPSLQDNPIVYASDDFLNCRFLQGTETSPQKVEKVRKAVSLGEDTTVTMINYTADGTAFWNKLFIAALRDAQNNIVNYIGVIVKVASPDPDDQETGKRLPGEQPSANVENA	Pennate	Bacillariophyta	Fragilariophyceae	Thalassionemales
MATOU-v2.78839509_1	78839509	RKAVQMGSDSTVCFLNYKADGTPFWNQLFIAALRDSDNNIVNFVGVVCEVEPEAGGNALEDRVNAVLPLQSKDDDDQD*VN*SLPMYLYRVYACWEPAVVGG*YHWEFVVPCNFYLPCIG**KRX	Pennate	Bacillariophyta
MATOU-v2.79087959_5	79087959	ADCYYENFPDDDRTTATVPVTVVPDIAASDDHAASAIVALQNAPDIPGKNSTVTPGMLAAECASVAPSTKAGDLAQAPDGFAAAVPPPEPNAVAHDATANISDSRKRPAEDDDDGEWTKRLERRVRNREHAKRSRLQKKFLLESLQDQIHGLQDQVNKLKKVLREELPDASKADQLIAEICGRETDGNGNELCCKPVPMPSGFGVGRHHAVKTVMEPDYRLVSALSGSQQNFVISDPSLPDNPIVHVSDGFLALTGYSLDQVLGRNCRFLQGPGTDQKAVDVIREGVEKGIDSSVCMLNYKADGTPFWNQVFVASLRDAENNVVNYIGVQCEVGKAVVEKQKHRAADLAARQKNNRVAKDERRKKEKPKRNEK**CRKRVTTAKEKKGGSVRPNDGIFL…	Centric
MATOU-v2.79248271_3	79248271	LDQILGRNCRFLQGPETDPKAVERIRNAIESGHDLSVCLLNYRVDGSTFWNQFFIAALRDAAGNITNFVGVQCKVSDTYAASVIKEQQKEEEEQQERRRRAAATTTAAATAAATTTTRWCNR*HSIEAQRGKTHDQ*KS*KKVYNFIWKIGTSKQ*SSIVKKPTGHITRTRKRTRIM*THSTK*RLSTCLLPKREKQL*PNRFVRNVLF*IRS*F*KE*I*FLNPYQN*HX	Pennate	Bacillariophyta
MATOU-v2.79527365_2	79527365	LVSALSGSQQNFVISNPSLPDNPIVHVSDGFLALTGYRLDQVLGRNCRFLQGPGTDQKAVDVIREGVEKGIDSSVCMLNYKADGTPFWNQVFVAALRDAENNVVNYIGVQCEVGX	Centric
MATOU-v2.80150531_2	80150531	SGSQQNFVISDPSLSDNPIVHVSDGFLALTGYRLDQVLGRNCRFLQGPGTDQKAVDVIREGVEKGIDSSVCMLNYKADGTPFWNQVFVAALRDAENNVVNYIGVQCEVGKAVVEKHQKX	Centric
MATOU-v2.81054901_6	81054901	PFWNQLFVAALRDGDNCIVNYVGVQTLIEPSAGASALEDKVNAAHPISVGVGDDKEVKETKK*CGG	Centric	Bacillariophyta	Coscinodiscophyceae	Thalassiosirales
MATOU-v2.81668191_3	81668191	RADKLLESVISPQEKYTPLPTPSGFGPVQTLMEPDYRLMQSLTGSQQNFAISDPSLPDNPIVYVSQGFLDLTGYTLKQVLGRNCRFLQGPGTDQASVDMIRKGVLDGVDTSVCLLNYKADGTPFWNQFFVAALRDAEKNVVNYVGVQX	Centric
MATOU-v2.81814078_6	81814078	QGPETDPKAVERIRNAIESGQDLSVCLLNYRVDGSTFWNQFFIAALRDAAGNITNFVGVQCKVSDTYAASVIKEQEQQQQQQQQQQQQQQQQQQQQQDGATGDIQ*KHREAKRMTNEKAEKKYTILYGK*EQASNALQL*RNQRGTSHAHGNAHE*CKRIVQSX	Pennate	Bacillariophyta
MATOU-v2.82250769_5	82250769	IRKKFLLESLQQSVALLKEENEKLRQSLKQHLGEEKGNALIEGKESSGDGHEGLLASSQGIANKVLDDPDFSFIKALQTAQQNFVVTDPSLPDNPIVYASQGFLNLTGYSLDQILGRNCRFLQGPETDPKAVDRIRKAIMGGNDMSVCLLNYRVDGTTFWNQFFIAALRDADGNVTNFVGVQCKVSDHYAATVTKQQQEEDEAAGDQ*SWQNLKYWPLLPSYAFIRLF*RIVLY*PDNIINNK*SKVLFGERYC**VKQK*GIVGEWFS*YVEYSKVLYVSTLLLANCATKMMEKIVVNFFHGYFLNYEGTNINAHNYKQ*SRN*RVFFFKYIALRNFW*TELISIFFLNKLNWLGFDSLVA*FLRKSRNV*QIX	Pennate	Bacillariophyta
MATOU-v2.82577313_5	82577313	RLLFLRTLPHNFRHNLFPKFHNTTT*QGIVQSTRMVDLSQKNKAVPSYVNELLDDCRFSPEGEAVFLSVEVDKDGVVDSAEATPATVASRILEDGTKVSAKVAGGIKTTNLENPELESTVMGPSSGAEPSESIPYKQAPQKENHIGFVTSANGRKKKSKKGKKSSDRKLKERKEKGSDEKVKERRDREHAKRSKARKKFLLDSLQKSVQLLREENEKLKESLKTHLGEETANKLLAVREDMLVKDDTPSGTNLVDGKKDVMAKFGANRTLDDTDNNFITALQTAQQNFCVTDPALPDNPIVYATQGFLNLTGYTLDQVLGRNCRFLQGPETDPVAVEKIRKAIAVGNDMSTVLLNYRADGTTFWNQFFIAALRDAKGDITNYVGVQCKVSDEYAATVCE…	Centric
MATOU-v2.82580833_6	82580833	GGGYYTTQLHDSSKPARTMGTMVPGVTKSTPAVPYKEAPQQRHHIQYASMTKKKSSRSSERKMSEQQKNERRERNREHAKRSRIRKKFLLESLQQSVAMLKEENDKLRDSIRQHVGEEQAEALLAEKMDGSNGDMRLTTSSQGAASKVLDDPDFSFIKALQTAQQNFVVTDPSLPDNPIVYASQGFLNLTGYSLDQILGRNCRFLQGPETDPKTVERIRNAIEHGDDLSVCLLNYRVDGTTFWNQFFIAALRDAAGNITNFVGVQCKVSDTYAASVIKEQQKEEEERAQAQKEAAAAAAAAEQQQQQPPPQMQQDTTQAMQ*AIHTQLVK*YQHGRQTLVNHYFSCDL*QVNNRNDPLNVLX	Pennate	Bacillariophyta	Bacillariophyceae	Bacillariales
MATOU-v2.82585218_3	82585218	QKDATKIIS*KIHLNAINLNTSSVEKLSGIHRNCCCYFQ*RCLKRHDYSHCR*QDSYE*DRRPLTYGSKACRKAV*LFITTNLVQRARWFRFYSIHVNRNTPLRYFLPIH*Y*RL*LKHCFEHEQSKMNTQQQQTQPPMFTTNLSATTQAAVAQRGTPSTLNLDDIFGDVMFTPDGDTVFLSEEQDALASGEQQVTTQASKIVTHGDQQQQQAIPIQRGGGYYTTQLHDSSKPARTMGAMVPGVTKPTTAVPYKEAPQQRHHIQYASMTKKKSSRSSERKMSEQQKNERRERNREHAKRSRIRKKFLLESLQQSVAMLKEENDKLRDSIRQHVGEEQAEKLLEQKMDGNNDMRLTTNSQGSANKVLDDPDFSFIKALQTAQQNFVVTDPSLPDNPIVYA…	Pennate	Bacillariophyta	Bacillariophyceae	Bacillariales
MATOU-v2.82585219_3	82585219	*QEYPVTVFLARTLIVKFVVRALFWIQTNQDEHAATTNTATDVHHQFVSDHPGCCRPAWNSLHLES**YIRRRNVYPGRRHCLPNVMFTPDGDTVFLSEEQDALASGEQQVTTQASKIVTQGEQQQQQAIPIQRGGGYYTTQLHDSSKPARTMGAMVPGVTKPVTAVPYKEAPQQRHHIQYASMTKKKSSRSSERKMSEQQKNERRERNREHAKRSRIRKKFLLESLQQSVAMLKEENDKLRDSIRQHVGEEQAEKLLEQKMDGNNDMRLTTNSQGSANKVLDDPDFSFIKALQTAQQNFVVTDPSLPDNPIVYASQGFLNLTGYSLDQILGRNCRFLQGPETDPKTVERIRNAIESGDDLSVCLLNYRVDGSTFWNQFFIAALRDAAGNITNFVGVQC…	Pennate	Bacillariophyta	Bacillariophyceae	Bacillariales
MATOU-v2.82585220_3	82585220	QKDATKIIS*KIHLNAINLNTSSVEKLSGIHRNCCCYFQ*RCLKRHDYSHCR*QDSYE*DRRPLTYGSKACRKAV*LFITTNLVQRARWFRFYSIHVNRNTPLRYFLPIH*Y*RL*LKHCFEHEQSKMNTQQQQTQPPMFTTNLSATTQAAVAQRGTPSTLNLDDIFGDVMFTPDGDTVFLSEEQDALASGEQQVTTQASKIVTHGDQQQQQAIPIQRGGGYYTTQLHDSSKPARTMGAMVPGVTKPTTAVPYKEAPQQRHHIQYASMTKKKSSRSSERKMSEQQKNERRERNREHAKRSRIRKKFLLESLQQSVAMLKEENDKLRDSIRQHVGEEQAEKLLEQKMDGNNDMRLTTNSQGSANKVLDDPDFSFIKALQTAQQNFVVTDPSLPDNPIVYA…	Pennate	Bacillariophyta	Bacillariophyceae	Bacillariales
MATOU-v2.82586399_4	82586399	KNS*KEALIRSPNCLDSYCLKN*KNNTFYMLAPIMSQPVTIPIFGSTSTQQQQPAQHQQAGVSGEWYMDDGEQDMDFDLLAEYLLEENPGTSQTGFDFNADFVVSPPQSDDGAPDSSGAQAATEIITQHAATIASTSVPAPSAVPATSQPPKSQVVQYAPVAAPPPLVLSPQIAAQGMAVPQTIPQYTPQQPGAMAPAPTIATAQQTNVPTRTTQHNKSGNTGEAKRRRPNPPEVAPQGLVNTSYMTNGTANMSPAVVAAAAAAAAMQGRGRKKTQAQIDRRRERNRILARRTRLRKKFFFESLQKEVMELQKENAALRDIVRTEIDGEEGRQLLEQCNAARKLPREVLEACGENPDLDQDDFNLVTSIQQSQHSFVITDPSLQDNPIVFASDDFLTLT…	Pennate	Bacillariophyta	Bacillariophyceae	Bacillariales
MATOU-v2.82586400_4	82586400	QPVTIPIFGSTSAQQQQPTQHQQAGVSGEWYMDDGEQDMDFDLLAEYLLEENPSTSQTGGVNFDFNADFVVSPPQSDDGAPDSSGAQAAREIITQHAATIASTTAPTPTVAPATSQPPKTQVIQYAPVPAPPPLATTPQIAAQGMAVPQTIPQYISQQPGSMVPAPAIATAQQTNVSTRTLQNNKSGNTGDAKRRRTNPPEVAPQGLIDTSYMTNGTANMSPAVVAAAAAAAAMQGRGRKKTQAQIDRRRERNRILARRTRLRKKFFFESLQKEVMELQKENAALRDIVRTEIDGEEGRELLEQCNAVRKLPREVLEACGENPDLDQEDFNLVTSIQQSQHSFVITDPSLQDNPIVFASDDFLTLTGYSREDVLGRNCRFLQGTNTSKEKVALIRKGLA…	Pennate	Bacillariophyta	Bacillariophyceae	Bacillariales
MATOU-v2.82603791_5	82603791	PIAKRAKLEPGATKQSTMTANVAATGGVTSRLGFNTGHLQGASQGGTALQIAGRSGILPAGVPGSMALAQQQQGSFAQHQQQGTAVALPVGRGIRLGGAGGVAPATARKVPGVGGMIWGGPQMMGMSDQAVAERRQRNREHAKRSRVRKKFMLESLQEQVASLQHENQRLRMLVQDNIPEHALTIISECCTSNPLFGDTASSGGQGTGDDEAGEGKNKTALVRSDFQLIDSLSAGQQNFVLSDPRLPDNPIVFATPGFYRLTGYTPEQVLGRNCRFLQGSGTDPKSVDIIRKAIQSGSDCTVCILNYKADGTPFWNQFFVAALRDSDNCIVNYVGVQTEIEPDAGANALEDRVNAVMPLANKDDDDEDGK*KVF*IFSTCVCLQDF*NFLRNNMIL*YS…	Pennate	Bacillariophyta	Bacillariophyceae	Bacillariales
MATOU-v2.82603792_6	82603792	PIAKRAKLEPGATKQSTMTANVAATGGVTSRLGFNTGHLQGASQGGTALQIAGRSGILPAGVPGSMALAQQQQGSFAQHQQQGTAVALPVGRGIRLGGAGGVAPATARKVPGVGGMIWGGPQMMGMSDQAVAERRQRNREHAKRSRVRKKFMLESLQEQVASLQHENQRLRMLVQDNIPEHALTIISECCTSNPLFGDTASSGGDDEAGEGKNKTALVRSDFQLIDSLSAGQQNFVLSDPRLPDNPIVFATPGFYRLTGYTPEQVLGRNCRFLQGSGTDPKSVDIIRKAIQSGSDCTVCILNYKADGTPFWNQFFVAALRDSDNCIVNYVGVQTEIEPDAGANALEDRVNAVMPLANKDDDDEDGK*KIF*RYNTCVCLQDS*NLFRNNMIL*YSRFNS…	Pennate	Bacillariophyta	Bacillariophyceae	Bacillariales
MATOU-v2.82610138_2	82610138	RNETSSNKSTRSCSSRSYQYLVYDERYSKYVSSSCGSSSCSSSYAREGTKKDSSPD*SKKRKKSYFG*ENTAQKEVLL*VATKGSDGAPERKCRLERHCTYRNRRRRRENTSGTM*RSKKVTKGSTRGMRRLEACGENPDLDQEDFNLVTSIQQSQHSFVITDPSLQDNPIVFASDDFLTLTGYSRDDVLGRNCRFLQGTNTSKEKVDLIRKGIATGEDVTVTLVNYTADGTPFWNKLFIAALRDAQNNIVNFIGVIVKVASPEPGDPDFGKPLGTESENNEKSQENADGTVMAIEGAVDAAVAAAPTVLSG*LSTRAKKVFLTSIGPSIFRFYLIHNQLIFQYQLHL*STLANYDARPRSX	Pennate	Bacillariophyta	Bacillariophyceae	Bacillariales
MATOU-v2.82611494_2	82611494	QEDFNLVTSIQQSQHSFVITDPSLQDNPIVFASDDFLTLTGYSREDVLGRNCRFLQGTNTSKEKVDLIRKGLAIGEDVSVTLVNYTADGTPFWNKLFIAALRDAQNNIVNFIGVIVKVASPEPGDPDFGKPLSTEAESKERSGSEADADGTVKAIEGAVTAAVAAAPSVLSG*YPDCEGDVVLFYQGAPDPIQQELCISVYKLLPFVLLLFATYFHAPINLSLLQTTIQTTNTNF*QPSKRSVPMASLFLL*TLGFLD	Pennate	Bacillariophyta	Bacillariophyceae	Bacillariales
MATOU-v2.82621520_3	82621520	SFSLHPTAPDLTESQLEALLIQNQMSGFDVASSGDPEPVSTSATAHEPSNSNAGAMQFFAPDPNAPADNTQLDLDELFRDCYFGDFPMPEVVPSATEVLAPDEPVASPKRTAGQAGLKETATRASRPSVMKAGASKSSYEQKPEAGASKSSYEQKPVEKGLSARPTASLSESQKVQRRTRNREHAKRSRLRKKFLLESLQEEVEGLQGELSALKSIIRRELPSKAAKLLRDAGSGPDSDDCPGLPMPSGFGPVKTLMKPDYRLMSALSGSQQNFAISDPSLPDNPIVFVSRGFLDLTGYTLDQVLGRNCRFLQGPGTDQAAVDTIRRGVKEGVDTSVCLLNYKADGTP	Centric	Bacillariophyta	Coscinodiscophyceae
MATOU-v2.82622426_4	82622426	APAPAIATAQQTNVPTRTTQNNKSANTSEAKRRRTNPPEVAAQGLIDTSYMTNGTANMSPAVVAAAAAAAAMQGRGRKKTQAQIDRRRERNRILARRTRLRKKFFFESLQKEVMELQKENAALRDIVRTEIDGEEGRELLEQCNAARKLPREVLEACGENPDLDQDDFNLVTSIQQSQHSFVITDPSLQDNPIVFASDDFLTLTGYSREDVLGRNCRFLQGTNTSKEKVDLIRKGVATGEDVSLTLVNYTADGTPFWNKLFIAALRDAQNNIVNFIGVIVKVASPEPGDPDFGKPLGLESESKEPSGGDADGTVKAIEGAVDAAVAAAPTVLSG*N*TIVKTCFCNGILFT**KSIVAVELFLRNACTIIPSNPFHGLSILKRKP*AIDL*K*K**R	Pennate	Bacillariophyta	Bacillariophyceae	Bacillariales
MATOU-v2.82626870_4	82626870	LDDIFGDVMFTPDGDTVFLSEEQDALASGEQQVTTQASKIVTHGDQQQQQAIPIQRGGGYYTTQLHDSSKPARTMGAMVPGVTKTTTAVPYKEAPQQRHHIQYASMTKKKSSRSSERKMSEQQKNERRERNREHAKRSRIRKKFLLESLQQSVAMLKEENDKLRDSIRQHVGEEQAEKLLEQKMDGNNDMRLTTNSQGSANKVLDDPDFSFIKALQTAQQNFVVTDPSLPDNPIVYASQGFLNLTGYSLDQILGRNCRFLQGPETDPKTVERIRNAIESGDDLSVCLLNYRVDGSTFWNQFFIAALRDAAGNITNFVGVQCKVSDTYAASVIKEQQREEEEQAQAQKEAAAAAAAQQQQVEQQQPPQQPAEHSTAQPMQ*GITYAFHSDCTIAFYLFPE…	Pennate	Bacillariophyta	Bacillariophyceae	Bacillariales
MATOU-v2.82627103_1	82627103	RFCSCLVRIQPLTTSTTTRK*CQHKKYTFAQEMMANGTYKNNAVPSYVHELIDDCRFTAEGEVVFLSEEGEKSDIVVSAEATPTTMASYVLEDGRAVPVNVAGGISATNLDKPGMPSTVMGPSSTNFSEPAPFRQPPQKTNHVSFATYRRDRAPKTQKSRRMSAEKQNGRGGRDREQAKRSRARKKLLVESLQKSVQQFKEENEKLKATLKLHLGEEAANEILARYKSPRTEDAGKLDENTLDETDSNFIKALETAQHNFCVTDPSLPDNPIVYATQGFLNLTGYTLDQVVGRNCRFLQGPETDPAASNKIREAIASGEDMSVCLLNYRADGTTFWNQFFIAALRDAEGNIVNYVGVQSKVSDDYAATVCKEQKGFNX	Centric
MATOU-v2.82660010_1	82660010	LNFPNYVILLLV*NCTNQTNSTASVLFQHSIIEFGGVSPPTSSSSEVSIYRN*RFSPVLNLHSNPLDL*SSLYHRLYRFTKLGLIVLASSRSNV*DIYLYIYNLKNAKYFSPDKRIIRADLFHCQFQYPC*KHKGTMSQGIQQPLFASASAQGQGDDFDLNEIFAEYFISEFENPVNAYTNAMGNYVAGPGTVAAPAPANAAPVPATYAPAPANVQHMQQAVVSSGIRTPYHSAVAAPATTVATVQPQQQQAQNLGVPVAKRAKLEPAATKQSTMTANVAATGGVTSRLGFNTGHLQGTSQAGTTLQIAGRSGILPAGVPGSMTLAQQQQGSFAQHQQQGTGVALPVGRGIRLGGAGGVAPATARKVPGVGGMIWGGPQMMGMSDQAVAERRQRNREHA…	Pennate	Bacillariophyta	Bacillariophyceae	Bacillariales
MATOU-v2.82663662_3	82663662	FVVTDPSLPDNPIVYASQGFLNLTGYSLDQILGRNCRFLQGPETDPKTVERIRNAIEQGEDLSVCLLNYRVDGSTFWNQFFIAALRDAAGNITNFVGVQCKVSDTYAASVIKEQQKEEEEQAQAQNEAAAQMQQQQQQQQPLPQVQHDTTHATQ*DTPPAFS*TILSYRSFQW*QSKRLIRVKHYFTCNHQQANDLLNPFSVHKICED*SIYSFTNGANKFIRQSDTTQHHTFIALSNSGDDYYYNLEDTYYITCYKP*YKTQNDKIITLSSN*FIIVX	Pennate	Bacillariophyta
MATOU-v2.82692780_2	82692780	RSISGIGGVSPPPSSLPKSFVSIVVSVYHSITSSLSKGLDSIKTKNTSKTEYDEKTAIVLGNWRVRALEEIFVAELQD*TKRKIELASKFCHHYLYKAEN*IGVKLLSSLSVYVLNMSQGIQQPLFASASAQGQGDDFDLNEIFAEYFISEFENPVNAYTNAMGNYVAAPGAAAPAPAPVNAAPAPYAPAPAPVQHIQQPVVSSGIRTPYHSAVAAPAPPAVQPPQQSMGLPVAKRAKLEPGATKTTMTANAGATKTTMTANVAATGGVTSRLGFNAGHLQGAAPGGTAVRGGILPAGVPGSMALPQQQGSYAQHQQQGTGVALPVGRGIRLGGAGGVAPATARKVPGVGGMIWGGPQMMGMSDQAVAERRQRNREHAKRSRVRKKFMLESLQEQVASL…	Pennate	Bacillariophyta	Bacillariophyceae	Bacillariales
MATOU-v2.82693697_3	82693697	NLYNTD*FSLKQESFSP*DLILIREGKRR*KRHWSIRSRAKRMADLSYNNNNNNTVPAYLNDLFGDCFFTPDGEAVFLSEEGDKNNIVASSEQTPAPIASRVLDDGTAVPANFAGGIAATNLDKPGMQATVMGPTTVAPTAPAPFIQPPQKENHIGFATLPTTSRSTKSRRTRKMSEQQQNERRERNREHAKRSRIRKKFLLESLQQSVQLLKEENEKLKDNIKIHLGEETASKLLAPEHLQSMSSSLASSGGAMVTPPSALAAGKEGIIANTSSDANKVLDDPDFNFIKALQTAQQNFVVTDPSLPDNPIVYATQGFLNLTGYTLDQVLGRNCRFLQGPETDPKAVDKIRKAIEAGVDMSVCLLNYRADGSTFWNQFFIAALRDAAGNVTNYVGVQCK…	Centric
MATOU-v2.82698043_5	82698043	GAILGSGEVTASQNASRPTAEGAGYTPVPQAGGISTTGLQKRGISTTGLQKRDGPAATMGTISGNAAPTTVPMAQPPQRPHHLQYAYVKAGGTQAPASASVDGTASTGAVKRSRSGGSISGVAKGDGSNKTDRSKLVKERNREHAKRSRIRKKFLLESLQQSVSLLKEENEKLKGAIRSHLGDKEADNLLSKQALADAAGAGGGLIASNSADANKVLDDPDFSFIKALQTAQQNFVVTDPSLPDNPIVYATQGFLNLTGYTLDQVLGRNCRFLQGPETDPKAVEKIRTAIEEGSDMSVCLLNYRVDGTTFWNQFFIAALRDAGGNITNYVGVQCKVSDQYAANVCKKQEEADMAAVRNKKRLIWQQLPPRQVV*V*NKKADGK*PTLPKRGLFSETCGS…	Centric	Bacillariophyta	Coscinodiscophyceae
MATOU-v2.82710520_2	82710520	TNSSGLGAGDDETGDGKNKTTALVRSDFQLIDSLSAGQQNFVLSDPRLPDNPIVFATPGFYRLTGYTPEQVLGRNCRFLQGSGTDPKSVDIVRKAIQSGSDCTVCILNYKADGTPFWNQFFVAALRDSDNCIVNYVGVQTEIEPDAGANALEDRVNAVMPLANKEDEDEDGK*RTL*RPVWTVIASVFE*HRDMVLQRLSYVH*K*NYSFHCM*SDVTMLKITSNEIKYLRLLWKPSCRARNED*FVVSTVNFRYIRR**YRARCLKLPRT	Pennate	Bacillariophyta	Bacillariophyceae	Bacillariales
MATOU-v2.82715745_5	82715745	TFWNQFFIAALRDAAGNITNFVGVQCKVSDTYAASVIKEQQREEEERAQAQKEAAAAQQQQAQQQAEQQQPQPPQHGATPTIQ*NAAAATATATRSYSNDSIE*IICI*SDCTIASRCFRNSKRASSHRSQIYT*SLASQKPQGSFGQS*TFVRIDLCIHQRGLNIHSSVRHHA*IALNKQRRRLLSFEX	Pennate	Bacillariophyta
MATOU-v2.82716737_3	82716737	SASNLFASAQGDFNEGAYDIDINELFHDCYFEEYNPTLEEDHAIPSLPPPTPKVETALPDIIPSKTEPENILPQKRSSPDVVYAPPTVSQPQPILPTAPVIQPLQQVIPQTQYQYQTVIPTPQTTSSFSSATSTAKLTEQQKLERRERNREHAKRSRLRKKFLLESLQEQIHGLQS	Centric	Bacillariophyta
MATOU-v2.82717283_3	82717283	TAASTALPPTDGSVGSAGEHPPGLPRTQAQVDRRRERNRILARRTRLRKKFFFESLQKNVADLQRENAALKGIARARLPPATAAELLAGCTAAARLPGAAAAAAGVDARAGGGGGGGGPVADPATALVRDDFSLVKAVRHAQQRFLITDPSLQDNPVVYASDGFLELTGYQREEVLGRNCRFLQGTATDPDTVGDIRRAIAKGEDIDVTLVNYKADGTPFVNRLFVAALRDAENNIVNFIGVIAEVPGGIGAAAARK*ARARGGDKTDRAGDEGASSRAPRHSQERHARTDCPTPGHVGRCGRRASEQNKGAEPDATLAAAAVCLV*RSSREAEHPTTSEQDAPRREDHESERITSSTKERCLACLTLKVT*LRCAEPHQVAIGA	Centric
MATOU-v2.82718171_2	82718171	VGEEQAEKLLEQKMDGNNDMRLTTNSQGSANKVLDDPDFSFIKALQTAQQNFVVTDPSLPDNPIVYASQGFLNLTGYSLDQILGRNCRFLQGPETDPKTVERIRNAIESGDDLSVCLLNYRVDGSTFWNQFFIAALRDAAGNITNFVGVQCKVSDTYAASVIKEQQREEEEQAQAQKEAAAAHEQPQQPPQPPQPGAAPTMQ*EKIYAFDSDCTIAYHLVPEIK*CFQTPKH*NTKHNHTCNY*QVNDHNDPRNILKLV*GLIHAF*RGLHIHSSGRHHATHTYIALSISGDDYHHLKETFSITCYKI*YRRQTEST	Pennate	Bacillariophyta	Bacillariophyceae	Bacillariales
MATOU-v2.82741646_4	82741646	PDRAAALLKGIGDSDEADSTAPNKGSFTPLPMPSGFGPVKTLMEPDYRLMSALSGSQQNFAISDPSLPDNP	Centric	Bacillariophyta	Coscinodiscophyceae	Thalassiosirales
MATOU-v2.82753489_5	82753489	RTRLRKKFFFESLQKEVMELQKENAALRDIVRTEIDGEEGRELLEQCNAARKLPREVLEACGENPDLDQEDFNLVTSIQQSQHSFVITDPSLQDNPIVFASDDFLTLTGYSREDVLGRNCRFLQGTNTSKEKVDLIRKGVATGEDVSLTLVNYTADGTPFWNKLFIAALRDAQNNIVNFIGVIVKVASPEPGDPDFGKPLGVESESKEQSGGDADGTVKAIEGAVDAAVAAAPTVLSG**LNYFIFSATSILFTY*NFNTC*AVIFTKHLNNYTKKSIRMFLVYKKR*P*VDDLFKEKDEDLMI*PKITCPNIIDNTNIFQSEKKCNSVX	Pennate	Bacillariophyta	Bacillariophyceae	Bacillariales
MATOU-v2.82772269_3	82772269	ADGTPFWNQFFVAALRDAENNVVNYVGVQCEVSKAVVEKHMGVDKKK*VDIKHTPALQSKV*NNMTN	Pennate	Bacillariophyta
MATOU-v2.82782446_3	82782446	GQQNFVLSDPRLPDNPIVFATPGFYRLTGYTPEQVLGRNCRFLQGSGTDPKSVDIIRKAIQSGSDCTVCILNYKADGTPFWNQFFVAALRDSDNCIVNYVGVQTEIEPDAGANALEDRVNAVMPLANKDDDDADGK*KLS*RLKHLCPQGSSHFFQKTL*YELFKVRIQNIGMEAHTGNLVLWYITGVVTRVEFV*NKTQX	Pennate	Bacillariophyta	Bacillariophyceae	Bacillariales
MATOU-v2.82807773_1	82807773	QSDIEKLTSVIRQEMPEKAEALLRDMQLSTDVSVKKNVGPNGTQYKPVNMPSGFGPVKTLIEPDFRLMFSLSNSQQNFAISDPSLPDNPIIYVSQGFLDLTGYTLDQVLGRNCRFLQGPGTDQAAVEVIRKGMKEGVDTSVCLLNYKADGTPFWNQFFVAALRDANNNIVNYVGVQCEVSKAVVESHLEHLNKDDGKGVTG*VVVYCS*FLFIYIRYIYRF	Centric	Bacillariophyta
MATOU-v2.82833194_3	82833194	NALYQQATTQVDHLAPAAPLPPQPMMAAPPQAQQQPVYVQQAAPVPQPAQNATTIAHHHHQQSVQQPQTVMPSGYKRPVPTDTNQQQRPNQRYKSQAQLDKRRERNRILARQTRLRKKYFFESLQKEVMDLQYENLALKEIVRQNFPSEQIKNKILDECKLTENLLSQTNQQINKDNGTDNENKNLEDVDYHFICSVKKSQQCFVITDPSLYDNPIVYASDDFYSLTGYSRDEVLGRNCRFLQGKDTSKEKIQKIKQSVGRGEDVGVCMINYTAQGIAFWNQLFIAALRDTQGNVVNFIGVLVNVKSPPKDDPEYGKQLVNDNIPLSIS	Centric
MATOU-v2.82837255_1	82837255	PLLHPGSALLAPSSVFPQANTAPPQAASAVTTNANAATIVHHQHSTTTQNAAVPTAGQKRDIDKAVSSSSNRPSQRTKSQAQIDKRRERNRILARRTRLRKKFFFESLQKEVMDLQRENYALKEIVKKNFEAVEGKNLLSECKVGDLPSILSSGDASSYGENNDMDDTDLTFISSVKKSQQCFVITDPSLHDNPIVFASEDFFTLTGYTREEVLGRNCRFLQGMDTCPTKLEQIRKSVAAGEDVSVCIVNYTSNGTAFWNQLFIAALRDTQGNVAPYVTHKEMLSILLVSW*KSVALYQMTLKLAKLFKMKLVKQQKMLIMF*LLSQIQLTYSK*FYNMFILRSYP	Centric
MATOU-v2.82838140_6	82838140	PPEVAAQGLINTSYMTNGTANMSPAVVAAAAAAAAMQGRGRKKTQAQIDRRRERNRILARRTRLRKKFFFESLQKEVMELQKENAALRDIVRTEIQGEEGRELLEQCNAARKLPREVLEACGENPDLX	Pennate	Bacillariophyta	Bacillariophyceae	Bacillariales
MATOU-v2.82910759_1	82910759	VGEEQAEKLLEQKMDNNGDMRLTTSTQGSANKVLDDPDFSFIKALQTAQQNFVVTDPSLPDNPIVYASQGFLNLTGYSLDQILGRNCRFLQGPETDP	Pennate	Bacillariophyta	Bacillariophyceae	Bacillariales
MATOU-v2.82941735_3	82941735	DDNLAQDAIPIISSTPRIPTPTPLEFNNAVPVASPDVVQSTAPRATTSTNLNSKRSFADAMKSKTSSSIYNNNSNHTKPSMNSGKLTDQQRLERRIRNREHAKRSRLRKKFLLESLQDQIHGLQTDI	Centric
MATOU-v2.82954441_6	82954441	LRKKFLLESLQEQIHGLQEQLEKFKKTIRTEIPAPKAEQLIDEICGHENKYTPLPMPSGFGPVKTLMEPDFRLMSALSGSQQNFAISDPTLPDNPIVYVSQGFLDLTGYQLDQVLGRNCRFLQGPGTDQSAVDVIRKGISEGIDTSVCLLNYKADGT	Pennate	Bacillariophyta	Bacillariophyceae	Bacillariales
MATOU-v2.82991973_2	82991973	KGSYTPLPMPSGFGPVKTLMEPDYRLMSALSGSQQNFAISDPSLPDNPIVYVSQGFLDLTGYSLDQVLGRNCRFLQGPGTDQAAVDVIRKGVREGX	Centric	Bacillariophyta	Coscinodiscophyceae
MATOU-v2.83042552_5	83042552	SRIRKKFLLESLQQSVAMLKEENDKLRDSIRQHVGEEQAEKLLEQKMDGNNDMRLTTNSQGSANKVLDDPDFSFIKALQTAQQNFVVTDPSLPDNPIVYASQGFLNLTGX	Pennate	Bacillariophyta	Bacillariophyceae	Bacillariales
MATOU-v2.83063863_3	83063863	RLAGTGYQPVTQGGGITTTGLDKPNVAATVMGSATKGPASGPAAPVKVPFAQAPQRPHHLQYAYVQATGAQSSAASDVAGTAVTGTGLGVKRSRGSNFPAAAASKPVDRKSMERSEIVKERNREHAKRSRIRKKFLLESLQQSVSLLKEENDKLKNAIRSHLGEKEAEALLSKQALADAGTAGASGLIAKNTGDANKVLDDPDFSFIKALQTAQQNFVVTDPSLPDNPIVYATQGFLNLTGYTLDQVLGRNCRFLQGPETDPKAVEKIRTAIEDGSDMSVCLLNYRVDGTTFWNQFFIASLRDAGGNITNYVGVQCKVSDQYAASVCKKQAEADAIVEKERAASGLKSG*LGDKPYQVKCVTKKMQCQHRKMKTMDFHGA*VLLTGQRVNRRFVSF*TH…	Centric	Bacillariophyta	Coscinodiscophyceae
MATOU-v2.83068610_5	83068610	AGQQNFVLSDPRLPDNPIVFATPGFYRLTGYTPEQVLGRNCRFLQGSGTDPKSVDIVRKAIQSGSDCTVCILNYKADGTPFWNQFFVAALRDSDNCIVNYVGVQTEIEPDAGANALEDRVNAVMPLANKDDDADEGK*RNLCWPRSNWLK*DLDPIG*NETLMINSIQIASR*CLLFKVFDPCEK*STHHDEENFERKFCTF*SS*NNLNILALIVNF*KLX	Pennate	Bacillariophyta	Bacillariophyceae	Bacillariales
MATOU-v2.83107689_6	83107689	HGGAWLG*SLKLRSNQGFDLSIRGGDRWCSISLFRRDGQDRVREESTTTMSEIENRSTDVPDPASVVSAAQDPTINNDNTSAMHLFAPDPNTTEENSSLALDELFDDCYFGEIPVIPEGVPSSTDAGVTAIASSFDFPRTSNEPTVATAPKRTADQAGLAKDAVTSISTSAASKAPVGGCGEEPSNQPASSLSETQKVERRTRNREHARRSRIRKKFLLQSLQEQMDGLQGEASALRAIIKRELPDRAESLLRSVGAGPEEVSAPGKGSYTPFSIPSGFGRDGKRVRTLMAPDYRLMSALSGSQQNFAISDPSLPDNPIVYVSQGFLDLTGYSLEQVLGRNCRFLQGPGTDQAAVEVIRRGISEGTDTSVCLLNYKADGTPFWNQFFVAGLRDAEDNVV…	Centric	Bacillariophyta	Coscinodiscophyceae
MATOU-v2.83131428_4	83131428	GAHVQRVRKKTYQQQGY*LT*NCGGTSTGRFCGASSTAVLVVRKDRRDFRYD*NPRRGHYFPTIELFDR*ILH*MALATKALQPHLGHQLPSDEANDNMDTSLDFDLLAEYLLEDVGNGGFDFSGAEVVNPPTIDAPSAKPSQQPAAAALVRDPGVVTPHHSDVSYGGSVDVPVTTQTQNQLVQPQNNNTTLLVNGDMSRELSQVQVMMATTQPQVQVPSVPVTAQLQQPRITPPQTSVQAPAIATVPRNPLPVMRQPQRAASKAPTAPRPPPPKPAVASTISTQASKRPRTTAAPQSTMAKASAYSFAGSNTMSMATAAMAAQINKAHPMPPAPQPDARGIEKTQAQVDRRRERNRILARRTRLRKKFFFESLQKDVADLQRENAALKSIIRSCLKPD…	Centric	Bacillariophyta	Coscinodiscophyceae
MATOU-v2.83146857_5	83146857	AVATKRSADQAGLAPSPRSRSSSGRKSGEAAGSRSRSASAGKELGLSQKPAASLTESQKIERRERNREHAKRSRLRKKFLLESLQEQIDGLQGEISALKSIVRRELPGRAAELLKGMGGGDDKGDDGSDAPPGMTGKYAPLPMPSGFGPVKTLMEPDYRLMSALSGSQQNFAISDPSLPDNPIVYVSQGFLDLTGYALDQVLGRNCRFLQGPGTDQAAVDVIRRGVSEGTDTSVCLLNYKADGTPFWNQFFVAALRDAENNVVNFVGVQCEVSKAVVEKHMSEGKTPKSSTKGGS*ATCWRGSLSPSQLRAKGGGCARERDSHVHRRCSRYHPRGQSKRIFTLDVSCKIK*SGGSNCQVFX	Centric	Bacillariophyta	Coscinodiscophyceae
MATOU-v2.83252291_2	83252291	RNCRFLQGPETDPKTVERIRNAIEHGDDLSVCLLNYRVDGTTFWNQFFIAALRDAAGNITNFVGVQCKVSDTYAASVIKEQQKEEEERAQAQKEAAAAAAAAEQQQQQPPPQMQQDTTQAMQ*AIHTQLVK*YQHGRQTLVNHYFSCDL*QVNNRNDPLNVLKLMRGLIHSFTNGAIYYLFVSQTSQHHSTLT*HYQTAAAIIIIIWRRLILSLARENKIQKTD	Pennate	Bacillariophyta
MATOU-v2.83256478_2	83256478	STKVRASNSQP*TC*KKSIA*EVSIRKFARPNTRLTNRH*ETYLIDKEGIA*QSCENVARIGII*WNC****RALYV*ASTNAKWLWSISNGTADSNEERSMYKPLPMPSGFGPVKALIEPDFRLMHSLSNSQQNFAISDPSLPDNPIIYVSQGFLDLTEYRL	Centric	Bacillariophyta
MATOU-v2.83256478_3	83256478	QQRLERRIRNREHAKRSRLRKKFLLESLQDQIHGLQTDIEKLTSLIKKELPDRAAKMLQELELSNGTADSNEERSMYKPLPMPSGFGPYLMELLIVMKNALCTSHYQCQVALVQ*RH**NLIFDSCIHYRTHSKILLFQTRVYLIIPLFMFLRAF*TSQNIVX	Centric	Bacillariophyta
MATOU-v2.83527101_2	83527101	TLKRRKLFCYFSPHNLGGNHCELITGRAHKLQTFIIIKYLSLLFGVSLDKEGKNS*NRILEKNEDRFRNYSDQRTRLHALILLDENKDNSFYMLAPIMSQPVTIPIFGSTSAQQQQPTQHQQAGVSGEWYMDDGEQDMDFDLLAEYLLEENPSTSQTGGVNFDFNADFVVSPPQSDDGAPDSSGAQAAREIITQHAATIASTTAPTPTVAPATSQPPKTQVIQYAPVPAPPPLATTPQIAAQGMAVPQTIPQYISQQPGSMVPAPAIATAQQTNVSTRTLQNNKSGNTGDAKRRRTNPPEVAPQGLIDTSYMTNGTANMSPAVVAAAAAAAAMQGRGRKKTQAQIDRRRERNRILARRTRLRKKFFFESLQKEVMELQKENAALRDIVRTEIDGEEGRQ…	Pennate	Centric	Centric	Centric
MATOU-v2.83585445_3	83585445	SAPAAPIPFMQPPQKENHIGFAALPATGRAATKSRRTRKMSEQQQNERRERNREHAKRSRIRKKFLLESLQQSVQLLKEENEKLKDSIKIHLGEDTANKLLSPEHLQSISSSLASSGAVGDAPTASPAEKDGILATGKDEANKVLDDPDFNFIKALQTAQQNFVVTDPSLPDNPIVYATQGFLSLTGYTLDQVLGRNCRFLQGPETDPKAVDKIRKAIEDGVDMSVCLLNYRADGTTFWNQFFIAALRDASGNVTNYVGVQCKVSDQYAATVCKRQNEVDDVDAVDAVDAEEEDD*SC	Centric	Centric	Centric	Centric
MATOU-v2.83610747_1	83610747	DLTGYTLDQVLGRNCRFLQGPGTDQAAVDVIRKGVQEGTDTSVCLLNYKADGTPFWNQFFVAALRDAEDNVVNFVGVQCEVSKAVVEKHISEGKTPMQQGG*GGVHNDEHFPAVVLNCSAGSNGEGAVRCSECCSRQGEAAGIFEPLVARNSAMVEFHSVRKSNE*LKAPNHHPGIVSAIA*CSLPCKQPFNAEDWSSCQPDAFSVLQFSSMLMCFVNFS**CLVQGTLPHAALAY*YQCHRICANFLSFLNVAX	Centric	Bacillariophyta	Coscinodiscophyceae
MATOU-v2.83641592_2	83641592	HDSFTIDFCYLVLECV*LPDLETQHLDGKVVPQEHRRGKLPRPGRKNLIFFPGSHSTLQVRQRNLNKSHDRSSFNDVLRSYAHLRSCFFNCIQIGRR*NWTRIEFTKQW*HSGF*SSGRISFGRSLGSYTDLLEDHLAATPSAYAGDVTQSKGFASALNSCTLAFQGGAGWTAGKAADQDQYAFADPLADGTIPLTHGTGTQTNTTQPTGNLVQVQPVAVVPAPVSSAPLAHLGMTLPPAPACSTLPASAPNLPSAGGSDMLVYHHAVPSSTGNKRPYPDVPANSSVSKGTGQVDCVQDPPGGKKQKNQAQIDRRRERNRILARRTRLRKKFFFESLQKEVTDLQRENTVLKEIVKAKLDAEVADAVLADCHVGDLPSVVVENSEDDANDLDQQDFNLV…	Centric	Bacillariophyta
MATOU-v2.83806179_4	83806179	TCPTKLEQIRKSISAGEDVSVCIVNYTSDGTAFWNQLFIAALRDTQGNVVNFIGVLVKVNAPLPDDPEAGKVIQNETGQSE	Centric
MATOU-v2.84867721_3	84867721	RFQDKILSTCQPQSCPNQLRFLFLGRQVPNSSNQHSSRDLANGIWMTEDRIWTSTY*RNTFLKNLVVVRLVVLISTPTLLCRLNKAWMAPVKVVWHKQETSLRSTLLQSHLHPPPQLLHLPPPLLFLVSQRHK*FNMYQLRLLLHWLCHLLLHLPQHAATIASTPDPAAPTPAAPAPKTQVVQYVPVAAPPPLVMSPPPQIAAQGMAVPQTIPQYIPQQTTMAPAPSTATTQRAPGRSAQKKTGETKRRRPNPPEVAAQGLINTSYMTNGTANMSPAVVAAAAAAAAMQGRGRKKTQAQIDRRRERNRILARRTRLRKKFFFESLQKEVTELQKENAALRDIVRTEIEGDEGRQLLEQCNAARKLPREVLEACGENPDLDQEDFNLVTSIQQSQHSFVI…	Pennate	Bacillariophyta	Bacillariophyceae	Bacillariales
MATOU-v2.84870613_5	84870613	DRRRERNRILARRTRLRKKFFFESLQKDVIDLQRENVLLKELARKKLPPEVSKKLLSECKAMEKLPSAVQEAVGESATDMNSQDFNLVQSIQRSQQCFVITDPSLQDNPIVYASDDFLSLTGYQRADVLGRNCRFLQGTETSPQKVEKVRKAVSLGEDTTVTMINYTADGTAFWNKLFIAALRDAQNNIVNYIGVIVKVASPDPDDQETGKRLPGEQPSANVENAHDTKLSATFEVRTNNALQPSEDPVKDPLSTATLH*SLLGLKYLILS*ISIDYPRIQMKRK*TEX	Pennate	Bacillariophyta	Fragilariophyceae	Thalassionemales
MATOU-v2.84905839_3	84905839	HGVVVHHHAPPASSSAIPNNKKRRVSGPVKPLTNGQPVSGRGRQKSQAQIDRRRERNRILARRTRLRKKFFFEGLQKEVTDLQRENFVLKDLVRKKLTPDASKRLLEECKAMEQLPSAVQEAVGESAADLDSQDFNLVRSIQQSQQCFIITDPSLQDNPIVYASNDFLTLTGYQREDVLGRNCRFLQGTETSPQKVEQVRKAISLGEDISVTIINYTADGTAFWNKLFLAALRX	Pennate	Bacillariophyta	Fragilariophyceae
MATOU-v2.84921263_5	84921263	ENEKLRSAIKSNLPAAEADELLNKKFGSGDAGLIANSSMDANKVLDDPDFSFIKALQTAQQNFVVTDPSLPDNPIVYATQGFLNLTGYTLDQVLGRNCRFLQGPETDPKAVEKIRRSIEEGSDMSVCLLNYRVDGTTFWNQFFIAALRDASGNITNYVGX	Pennate
MATOU-v2.84926432_1	84926432	SNLRLPLREWQFLKLFHNTSRNNRVRWPQLLQLRRRNKQTCPPEQRRTINLEILVRLNAVEQIHPKLPHKDLLTLHI*LMALQTCLQQLLLLLQLLLPCKVGDGRRPKLRLIEEEKETVFWPGEHDFERSSSLSRYRRK*WSSRKKMQH*EILCARKLMEKKVENSWNNAMQQENCQEKFSRRAEKILIWTKTTLI*SRVFSSRNIHSLSPTRVFKTIQSSLPRTTFSHSLVIQEKMCSGGIAGFCKVPIQVKKRWT*SALTLVNYTADGTPFWNKLFIAALRDAQNNIVNFIGVIVKVASPEPGDPDFGKPLGLEGESKEQAGGDADGTVKAIEGAVEAAVAAAPTVLSG*KL	Pennate	Bacillariophyta	Bacillariophyceae	Bacillariales
MATOU-v2.84926432_3	84926432	QPQIAAQGMAVPQTIPQYIPQQPGAMAPAPAIATAQQTNVPTRTTQNNKSGNTGEAKRRRTNPPEVAPQGLIDTSYMTNGTANMSPAVVAAAAAAAAMQGRGRKKTQAQIDRRRERNRILARRTRLRKKFFFESLQKEVMELQKENAALRDIVRTEIDGEEGRELLEQCNAARKLPREVLEACGENPDLDQDDFNLVTSIQQSQHSFVITDPSLQDNPIVFASDDFLTLTGYSREDVLGRNCRFLQGTNTSKEKVDLISFDSSELYRRRDTILE*TLYCGTPRRTKQHCEFYWRYCQGGFPRTWRSGFRKASRIRGRIQRTSGGRC*WHCKGDRRCRRSSGRCCSNCP*RLKTX	Pennate	Bacillariophyta	Bacillariophyceae	Bacillariales
MATOU-v2.84990658_6	84990658	GTAFWNKLFLAALRDAQNNIVNYIGVIVKVATPDSGDPEAGKRLPGESAPNNREGHGSDVGKQTGNVPKDSECDVDQELDDDVTSESAKTNW**KIIFDYLFLIYIICNKTFELLQIYYG*SKLMVT*LNTIEKPKMIANIICX	Pennate
MATOU-v2.85030596_6	85030596	YPLQ*FARHSGYIRSQTNRKTELIRFLLSLSR*NTIYMSAPIMSQPVTIPVFGSTSTQQQQPTQQQGSGEWYMDDGGQDMDFDLLAEYLLEEPGSSQTGGFDFNADFVVSPEQSVDGAGESGVAQARDIITQHAATIASTPAPAAPTPAAPAPLSSEPKTQVVQYVPVAAPPPLVMSPPPQIAAQGMAVPQTIPQYIPQQTTMAPAPSTATTQRAPARSAQKKTGETKRRRPNPPEVAAQGLINTSYMTNGTANMSPAVVAAAAAAAAMQGRGRKKTQAQIDRRRERNRILARRTRLRKKFFFESLQKEVTELQKENAALRDIVRTEIEGDEGRQLLEQCNAARKLPREVLEACGENPDLDQEDFNLVTSIQQSQHSFVITDPSLQDNPIVFASDDFLT…	Pennate	Bacillariophyta	Bacillariophyceae	Bacillariales
MATOU-v2.85109612_4	85109612	RGVMEGTDTSVCLLNYKADGTPFWNQFFVAALRDAENNVVNFVGVQCEVSKAVVEKHISEGKTPPLKS*PGPFSLTSVSRSSQSL*LPGLVPN	Centric	Bacillariophyta	Coscinodiscophyceae
MATOU-v2.85197965_1	85197965	QNFAISDPSLPDNPIVYVSQGFLDLTGYSLDQVLGRNCRFLQGPGTDQAAVDVIRRGVMEGTDTSVCLLNYKAX	Centric	Bacillariophyta	Coscinodiscophyceae
MATOU-v2.85903621_5	85903621	EKVDLIRKGVATGEDVSLTLVNYTADGTPFWNKLFIAALRDAQNNIVNFIGVIVKVASPEPGDPDFGKPLGLESESKEHSGGDADGTVKAIEGAVDAAVAAAPTVLST*KLIYSENLFLQGNTIHMMKTNTCCAVNFYETPEQLYQAIHSHGLIILX	Pennate	Bacillariophyta	Bacillariophyceae	Bacillariales
MATOU-v2.86723387_5	86723387	AVAGAGYQPVPQAGGITTTGLDRPNANATVMGKAVAATTPAQAPFAQAPQRPHHLQYAYVQTGGQTAAPTVPATMATPASATAASNAGKKRAIATSTATKPPVEKKSMDRSQVVKERNREHAKRSRIRKKFLLESLQQSVSLLKEENAKLKNAIRTHLGEKEAEALLNKQALADAASSGVGGLIANNKSDANRVLDDPDFSFIKALQTAQQNFVVTDPSLPDNPIVYATQGFLNLTGYTLDQVLGRNCRFLQGPETDPKAVEKIRNAIEEGSDMSVCLLNYRVDGTTFWNQFFIAALRDAGGNITNYVGVQCKVSDQYAASVCKKQDEADAAAAPSKASGGLKSDS*GMSFRFGHFCISCCM*RRG*EDRKATKIS*LTN*LRITGX	Centric	Bacillariophyta	Coscinodiscophyceae	Thalassiosirales
MATOU-v2.86756286_4	86756286	HQPQRVQLIGTTPASDHY*F**CLCGITLGLPILLIDLRRKLH**ISRWFRFDRSTTPGISD*TPEAPTWNTKVNLGPLTHHIIYCKNHKKMNANQQQPQAQAPLFTTNLSATTQAAVAQRGTPSTLNLDDIFGDVMFTPDGDTVFLSEDQDALASGEQQVTTQASKIVTHGDQQQQAVPIQRGGGYYTTQLHDSSKPARTMGTMVQGVTKPTAAVPYKEAPQQRHHIQYATMTKKKSSRSSERKMSEQQKNERRERNREHAKRSRIRKKFLLESLQQSVAMLKEENDKLRDSIRQHVGEEQAEKLLEQKMDGSNGDMRLTTSSQGAANKVLDDPDFSFIKALQTAQQNFVVTDPSLPDNPIVYASQGFLNLTGYSLDQILGRNCRFLQGPETDPKTVE…	Pennate	Bacillariophyta	Bacillariophyceae	Bacillariales
MATOU-v2.86820183_6	86820183	SQFKENGGTNLAAAAPDGGSSVKKLDREDFSLIQSIQNSQQCFIISDPSLHDNPIVYASDDFLRLVGYSQDEVLGRNCRFLQGTETCQEKVAQIRKAVAAGGKPFWNSLFIAALRDADNNIVNFIGVVVKVSAPEKDDPEYGKVLKC***RRQVEVPSPQLPSNVT*SIILDRI*QI*DWERG*KSKWFQPD*NSTRSDQTRX	Centric	Bacillariophyta	Coscinodiscophyceae
MATOU-v2.87748308_2	87748308	KESILFGNMSGNQVPMFTSDLSATTQAAVAQRGTPSTLNLDDIFGDVMFTPDGDTVFLSEEQDALGSGEQQVTTQATKIQGEQAVPVPRGGGLYTTQLHDSSKKARTMGTVVPGLKTTAAVPFKEAPQQRHHIQYATTSKKKSSRSSERKMSEQQKNERRERNREHAKRSRIRKKFLLESLQQSVAMLKEENDKLRTSIRKHVGDEQAERLLEQKMDGSNGDMRLTTQSQGAANKVLDDPDFSFIKALQTAQQNFVVTDPSLPDNPIVYASQGFLNLTGYSLDQILGRNCRFLQGPETDPKAVERIRNAIESGHDLSVCLLNYRVDGSTFWNQFFIAALRDAAGNITNFVGVQCKVSDTYAASVIKEQQKEDEEQQQQQQQQQQQQQQQQQDGATGDIQ…	Pennate	Bacillariophyta	Bacillariophyceae	Bacillariales
MATOU-v2.87768293_2	87768293	GFGVGRQHAVKTVMEPDYRLVSALSGSQQNFIISDPSLQDNPIVHVSDGFLALTGYRLDQVLGRNCRFLQGPGTDQKAVDVIREGVEKGIDSSVCMLNYKADGTPFWNQVFVAALRDAENNVVNYIGVQCEVGKAVVEKQQKDRSVDLGAHRQKNNRIANDEGRAKKA*WKVMIMQASNERKKKKRQDSPKRWWHIVSRAKSMMRHVRKDQGQ*KQQQDSSRGNDARRDRIVYVLKTA*TKMSKRPPKKQNYEKRRGRNENGKETIAQKILIVHTRDEAPIKDTCKWQTTMPLRRG*EVEDAIPK*L*SNFKSAKX	Centric
MATOU-v2.87789153_5	87789153	QKLLEQCSAARKLPREVLEACGENPDLDQQDFNLITSIQQSQHSFVITDPSLQDNPIVFASDDFLALTGYSREDVLGRNCRFLQGAHTSKDKIDEIRKGLATGDDVSVSLVNYTADGTPFWNKLFIAALRDAQNNIVNFIGVIVKVASPEPGDPEFGKNIGENDKEDVADNCGADADGTVKAIEGAVDAAVAAAPAVLSG*YSSHDGWLEVGFGLSRVPSRLDPKELSQLYCIPPKYPIHSIMDCFCR*R*NCRKMRX	Pennate	Bacillariophyta	Bacillariophyceae	Bacillariales
MATOU-v2.88197068_6	88197068	LDLTEYTLDQVLGRNCRFLQGPGTDQSAVDVIRKGVREGIDTSVCLLNYKADGTPFWNQFFVAALRDADNNVVNFVGVQCEVSKAVVESRIEEKAKSKV*R*SVSQYVAFHDNIYLICSLLS*SI*K*STX	Centric	Bacillariophyta
MATOU-v2.88288694_3	88288694	DGSNGDMKLTTQSQGAANKVLDDPDFSFIKALQTAQQNFVVTDPSLPDNPIVYASQGFLNLTGYSLDQILGRNCRFLQGPETDPKAVERIRNAIESGHDLSVCLLNYRVDGSTFWNQFFIAALRDAAGNITNFVGVQCKVSDTYAASVIKEQQKEDEEQQQQQQQQQQQQQQQQQDGASNNNSNNNKMVQQVTFNRSTERQNA*PMKELKKSIQFYMESRNKQAMIFNCKETNGAHHTHTETHTNNVNAQYKVTIVDMLATEERKQL*PNRFVRTVLFWIRS*F*KE*I*FS	Pennate	Bacillariophyta
MATOU-v2.88981382_5	88981382	CKPIPTPSGFGVGRDQKVKTVLEPDYRLVSTLSGSQQNFVVSDPALPDNPIVHASAGFLDLTGYRLDEVLGRNCRFLQGPGTDRKAVDVIREGVAKGIDVSVTLLNYKADGTPFWNQVFVAALRDANNNVVNYVGVQCEVSRPVMEKQTKKRHRAVRGA*KCNGNGNDDDDDEEEEEKGRSRAQKIMVIIILLNVANNNNNISIINNSKVALRQ*RPARSRLIIFLEDDTTERTNSE*TTRKNILIELAKKEDKITSMHGRKRSDQKC*SF*CDETNQ*WELLLX	Centric
MATOU-v2.89031909_3	89031909	MGNNNSNAVPNYLNDLFGDCFFTPEGEAVFLSEEADRNNIVSSSEATPATVASRIMEDGSAVPAIAAGGIAATNLDKPGLHATVMGPSTVATTTTTAAVATQQPASDANKVLDDPDFNFIKPLQTAQQNFVVTDPSLPDNPIVYATQGFLNLTGYTLDQVLGRNCRFLQGPETDPKAVDKIRKAIEAGIDMSVCLLNYRADGTTFWNQFFIAALRDAAGNVTNYVGVQCKVSDQYAATVCKRQSEIDDDEND	Centric
MATOU-v2.89142790_2	89142790	RRYLSLSLRNGPITYRMLR*GLLMFRPVGRQQPRQFQPPWRHPRRLLRHQMRERNGL*GHQHQQQQNHQSKKSPWTEVKL*KNEIENMPKDREFEKSFCSNPFNKVYRC*KKKTAN*RMLYGHIWEKRRRKRS*TNRLLLMQPPLAVGGLSRTTSPMRTEYWTIQTFHLSRRYKRHSKTL**RIQVCRTIQLFMRPRVSST*QGTRSIRCWVGTVGFCRVLGRNCRFLQGPETDPKAVEKIRNAIEEGSDMSVCLLNYRVDGTTFWNQFFIAALRX	Centric	Bacillariophyta	Coscinodiscophyceae	Thalassiosirales
MATOU-v2.89148236_6	89148236	NATERLPQAVVEACGESATDYDQQDFNLVRSIQHSQHSFVITDPSLQDNPIVFASDDFLNLTGYSREDVLGRNCRFLQGTDTNQSKIEQIRKGLETGEDITVTLVNYTSDGNPFWNKLFIAALRDAQNNIVNFIGVIVKVGGPEPGDPEHGKKLPGESDAGDNDVMPDAGNSIGGASDAVASADNSAVVHGX	Pennate
MATOU-v2.89170288_5	89170288	RDDVLGRNCRFLQGTNTSKEKVDLIRKGVATGEDVSLTLVNYTADGTPFWNKLFIAALRDAQNNIVNFIGVIVKVASPEP*DPDFGKPLGLENETKEQSEGDVDGX	Pennate	Bacillariophyta	Bacillariophyceae	Bacillariales
MATOU-v2.89171034_2	89171034	HGGQQNFVLSDPRLPDNPIVYASEGFYQLTGYTREQVLGRNCRFLQGPGTDPKAVDVIRAAVANGTDATTCLLNYKADGTPFWNQFFVAALRDSDNCIVNYVGVQCAIDPEAGANALEDKVNSVLPLVNNDDASEKK*QGCYEIAQSGTRL	Centric
MATOU-v2.89202969_6	89202969	SISYSNSFKRNF*TTFFSNNPKCC*SFISSTQPTSSCWNESTPSITDLATALEK*FSHCSCDTTK*TSKD*INSTQSGSNTIDNKLS*TSQSP*DQSYSS*SCNVQMINSSFVEQRPGRQKSQAQIDRRRERNRILARRTRLRKKFFFESLQKEVTDLQKENLVLREIVKSRIQKDKADAILKDCKANEELPQVVLEHCGDPMALSRQDFNLIASIKQSQESFVITDPSLQDNPIVYASDGFLELTGYAREQVLGRNCRFLQGTDTDPKKVAEIRKGLISGDDVSVTIRNYCADGTPFWNKIFIAALRDAQNNIVNYIGVSVRVAGDPEDPKHDDNGDTNAYGHEPIPSEGGMNGSDAVDFDAAVMAIEGAVTAAVEAAPKMVNHX	Centric	Bacillariophyta	Coscinodiscophyceae	Chaetocerotales
MATOU-v2.89245564_3	89245564	GFLDLTGYTLDQVLGRNCRFLQGPGTDQSAVDVIRKGIREGVDTSVCLLNYKADGTPFWNQFFVAALRDAENNVVNFVGVQCEVSKAVVDKQMAEKGYGIKDGKP*NSSWRLSRGNEAVPFHSNHTCLRNLLHIIQIAHNIISKINEX	Centric
MATOU-v2.89277746_6	89277746	NFVVTDLSLPDNPIVYASQGFLNLTGYSLDQILGRNCRFLQGPETDPKAVERIRNAIDQGNDLSVCLLNYRVDGTTFWNQFFIAALRDASGNITNFVGVQCKVSDQYAASVTKEQEAEDAAAEEE*TTPLMASSQTFFYKGILLAWTRTHQKQRCGRIEQDKFVCSSRQQKETT*ALAIYGEFPFD*RTDX	Pennate
MATOU-v2.89307029_3	89307029	VLGRNCRFLQGTETSPQKVEKVRKAVSLGEDTTVTMINYTADGTAFWNKLFIAALRDAQNNIVNYIGVIVKVASPDPDDQETGKRLPGEQPSVNGENA	Pennate	Bacillariophyta	Fragilariophyceae
MATOU-v2.89409156_2	89409156	ALLKEENEKLRDSIREHLGNEKAEQLLNNSAGSEAPDAALIASSQGAANKVLDDPDFSFIKALQTAQQNFVVTDPSLPDNPIVYASQGFLNLTGYSGYSLDQILGRNCRFLQGPETDPKAVERIRSAIEQGNDLSVCLLNYRVDGTTFWNQFFIAALRDASGNITNFVGVQCKVSDQYAASVTKQQEEEDAQ*VIFIS*MEGGSVWYIFFGRKVSASLGMNRLDGTQLYCHHSTRK	Pennate	Bacillariophyta
MATOU-v2.89451067_1	89451067	PDYRLVSALSGSQQNFVISDPSLQDNPIVHVSDGFLALTGYRLDQVLGRNCRFLQGPGTDQKAVNVIREGVEKGIDSSVCMLNYKADGTPFWNQVFVAALRDAENNVVNYIGVQCEVGKAVVEKQQKDRSADLAARQNNNRIANVEGRAQKA*WKVIIMQASNERKKKKRQERHIVSWAKLMMRCICTQITTTITAT	Centric
MATOU-v2.89451068_2	89451068	KPVPMPSGFGVGRQHAVKTVMEPDYRLVSALSGSQQNFVISDPSLPDNPIVHVSDGFLALTGYRLDQVLGRNCRFLQGPGTDQKAVGVIREGVEKGIDSSVCMLNYKADGTPFWNQVFVAALRDAENNVVNYIGVQCEVGKAVVEKQQKDRSADLAARQNNNRIANVEGRAQKA*WKVIIMQASNERKKKKRQERHIVSWAKLMMRCICTQITTTITAT	Centric
MATOU-v2.89451069_1	89451069	PDYRLVSALSGSQQNFVISDPSLQDNPIVHVSDGFLALTGYRLDQVLGRNCRFLQGPGTDQKAVNVIREGVEKGIDSSVCMLNYKADGTPFWNQVFVAALRDAENNVVNYIGVQCEVGKAVVEKQQKDRSVDLGAHRQRNNRIANDEGRAKKA*WKVTIMEASNERKKKKRQDAPKRWWRSVSRAKSMMRYVRK*QRQ*QQQQDSSRGNDARRDRIIYFLKTA*TKMSKRPPEKIELRKKKGGKMEMEK*QLPRKRSTNQRYMQVANNDAAPRG*EVKDVIPK*VQFLC*QKX	Centric
MATOU-v2.89514420_1	89514420	SLPRVKPFSCPINLNQTNILPLLKVIYPS*LLLATVMGAPQAQGVPHQAQLNAKVQQDHHMGFISTAISTANMAGAVATAGAGTNSKVKKRRQRPGQERKMSEQQKTERR*VLRK*MRVTH*IKILVI*MLTVREIFLHHRERNREHAKRSRIRKKFLLESLQQSVVLLKEENESLRSSIRKHLGSEQANQLLTKKNLEEQSEAAAAAGLIASDANNANKVLDDPDFSFIKALQTAQQNFVVTDPSLPDNPIVYATQGFLNLTGYTLDQVLGRNCRFLQGPETDPKAVEKIRKSIEDGTDMSVCLLNYRVDGTTFWNQFFIAALRDAEGNITNYVGVQCKVSDQYAATVCKRQCEDGSNTTAANIDSTAPSNQ*FLPILF*PDLHYVVVAELVFLNDLK…	Centric	Bacillariophyta
MATOU-v2.89523980_2	89523980	NGQPVSGRGRQKSQAQIDRRRERNRILARRTRLRKKFFFEGLQKEVTDLQRENFVLKDLVRKKLTPDASKRLLEECKAMEQLPSAVQEAVGESAADLDSQDFNLVRSIQQSQQCFIITDPSLQDNPIVYASNDFLTLTGYQREDVLGRNCRFLQGTETSPQKVEQVRKAISLGEDISVTIINYTADGTAFWNKLFLAALRDAQNNIVNYIGVIVKVATPDSGDPEAGKRLPGESAPNNREGHESDVGKQTGNMPKDGECDVDQELDDDF*ECKNELVIKKSSFLFLHHTREHATNLLQMNKMNKMRG*X	Pennate	Bacillariophyta	Fragilariophyceae
MATOU-v2.89539896_5	89539896	TVVHSHARLLMGPHGDGQGGQAGISDKAIAERRQRNREHAKRSRVRKKFMLESLQEQVSSLQRENQALRLLIQENIPTHAQEIISECCCKNPLFADDPNGASSDGNNNEVTKLHRSDFSLMDSLSASQQNFCLSDPRLPDNPVVFASPGFYKLTGYTAKEVLGRNCRFLQGSGTDSKTVEIIRKAVAIGADCTVCILNYKADGTPFWNQFFVAALRDSDNNIVNYVGVQCEVEPEAGASALEDKVNEVLPLQFKEE*TARIIRIDWKFEE*CRX	Pennate	Bacillariophyta
MATOU-v2.89542168_5	89542168	KRSRLRKKFLLESLQEQIHGLQSEIEDLKNVIKKEIPDKAEALLEKINGKQGQFTPLPMPSGFGPVKTLMEPDFRLMSALSGSQQNFAISDPSLPDNPIVYVSQGFLDLTGYTLDQVLGRNCRFLQGPGTDQSAVDVIRKGVREGVDTSVCLLNYKADGTPFWNQFFVAALRDAENNVVNFVGVQCEVSKAVVESQMNSKSS*IFIY*YYTEYIX	Centric
MATOU-v2.89559717_1	89559717	SAVDIIRKGVREGVDTSVCLLNYKADGTPFWNQFFVAALRDAENNVVNFVGVQCEVSKAVVEKQIQEQQNGGKTDS*DYISVEEGWLLQSCCFVEKK**MA*RASCLNSMALKLGDKSLYASCMGK*CKSDKVCYFRTEKYSPSHLCSMNEISNDLVEX	Centric	Bacillariophyta
MATOU-v2.89559956_6	89559956	TWGFYNLTGYSREQVLGRNCRFLQGPGTDPKHIEMIRSAVAKGNDFSVCVLNYKADGTPFWNQLFVAALRDTDNCIVNFIGVQCAVETEGESTLLEDKVNSVLPLAIKENPNPLGLSKPS*NGLCCIGD*YYRRNLFATGSIYVLVLNSLA*SYTIX	Centric	Bacillariophyta	Coscinodiscophyceae	Leptocylindrales
MATOU-v2.89616099_1	89616099	KSRKRPAEDNCDDGERTKQLERRVRNREHAKRSRLRKKFLLESLQDQIYGLQDQVNKLKKALREELPDASKSNQLIADICGRETDSNGNELCCKPVPMPSGFGVGRQHAVX	Centric	Bacillariophyta	Bacillariophyceae
MATOU-v2.89677832_5	89677832	KELPDKADQILKELSGEKEKFTPLPMPSGFGPVKTLMEPDFRLMSALSGSQQNFAISDPSLPDNPIVYVSQGX	Pennate
MATOU-v2.89784281_4	89784281	DGTNLTGAAPDGGSSVKKLDREDFSLIQSIQNSQQCFIISDPSLHDNPIVYASDDFLRLLGYSQDEVLGRNCRFLQGTETCQEKVAQIRKAVAAGEDVSVTFVNYTSDGKPFWNSLFIAALRDADNNIVNFIGVVVKVSAPEKDDPEYGKVLKC*YLRRRVEVPSLTVPSNVTLSILLG*QIYDWERG*KK*IGSNPI	Centric	Bacillariophyta	Coscinodiscophyceae
MATOU-v2.89880262_4	89880262	EGVDTSVCLLNYKADGTPFWNQFFVAALRDAENNVVNFVGVQCEVSKAVVEKQIAEGKIPTSAK*KLGICTPWVDHSFPSP*M*Y*LRQIMAAIPH	Centric
MATOU-v2.89891147_5	89891147	FAISDPSLPDNPIVYVSQGFLDLTGYNLEQVLGRNCRFLQGPGTDQSAVEVIRRGIREGVDTSVCLLNYKADGTPFWNQFFVAALRDAENNVVNFVGVQCEVSKAVVEKQMAEGKIPX	Pennate
MATOU-v2.89899265_1	89899265	ILGRNCRFLQGPETDPKSVEKIRKAIEAGNDMSVCLLNYRVDGTTFWNQFFIAALRDASGNVTNFVGVQCKVSDQYAATVVSQQDEAAGEE*GTDCEEGIELLX	Pennate
MATOU-v2.89906287_1	89906287	SLQDNPIVYASDDFLTVTGYKRADVLGRNCRFLQGPETSQSKVAMIRKGVENGNDVSVTFVNYTADGEAFWNKLFIAALRDAQNNIVNFIGVIV	Centric
MATOU-v2.89925983_3	89925983	RLMSALSGSQQNFAISDPTLPDNPIVYVSQGFLDLTGYSLDQVLGRNCRFLQGPGTDQSAVDVIRKGIKEGIDTSVCLLNYKADGTPFWNQFFVAALRDAANNVVNYVGVQCEVSKAVVEKHMG	Pennate	Bacillariophyta
MATOU-v2.90018648_1	90018648	FG***FFSSTLSCSNLRHECR**SAASTISGTAATASSSE**CIDWSSGISNGSKEYVSSTVRCRANDEFITRK*YD*REFTCWSWNTSTWSCSASESSYYCPSRRDTT*SVGKGRYYTFLAWYSCWWWCC**SQWIDVNKVNGLMPGMGVDLSKFGTGGTADDQMAERRQRNREHAKRSRVRKKFMLESLQEDVRQLQRENTDLRMIIQDKLPHLAQKILDECCSVNYLFKDENPSSIVTDNNTNNSNALMRSDFNLIQSLTSSQRNFVLSDPRLPDNPIVYASEGFYQMTGYAREQVLGRNCRFLQGPGTDPKHIDLILISFATQSQKEMIFQFVF*IIKQMELRFGINYSSRLYVIMTIV**TSLEYSVL*ILNQSQPFWKIK*IQCYL*Q*KTIN…	Centric	Bacillariophyta	Coscinodiscophyceae
MATOU-v2.90018648_3	90018648	WVIMIFQLNPLLLQPPS*MQVIVSSIHNLRHSSNSKLLGVVVH*LVVWDFKWE*RIRILNRQMPRKR*VHYKKVIRLA*IYLLELEYEYLELFSIRIKLLLPQ*ARYNIISGEREVLHFPRMVFLLVVVLLIKSMD*C**SQWIDAWYGC*FI*IWDWRDS**SNGRTSSEKS*TRQEKPSEEEVHVRIATRRRATIAERKY*PSHDYTGQASAFGPENSR*MLFCKLSI*G*KPK*YSYG**YKQQQRFDAL*L*SHSESYIQSTKFCFVRPTIAR*PNRLCQ*RLLSNDRLCKGAGVRT*LSILARTWNRPEAY*SHIDLIRNAVAKGNDFSICILNYKADGTPFWNQLFVAALRDNDNCIVNFIGVQCSVDTESESTFLEDKVNSVLPLAVKDDQ*…	Centric	Bacillariophyta	Coscinodiscophyceae
MATOU-v2.90072702_5	90072702	WNQFFVAALRDAENNVVNFVGVQCEVSKAVVEKQMKQKEAEAEKAQKEG*CVEWFHGSWEEKVINKYLLVEEIPQHA*TNIKKGREDGKLGKKFAIQ*KMKMLLIASECVE*YAVFHCIGLLNPFSSPRHFPKGKKGKIYHYLFIFSMTTYYNR*FLHX	Centric	Bacillariophyta	Coscinodiscophyceae	Chaetocerotales
MATOU-v2.90130729_3	90130729	SGDDVTVTFINYMADGTPFWNKLFIAALRDAQNNIVNFIGVSVKVAGPDPSDHEFNKALPGESVVSDTAEDAFDVKEEITVDADAAVMAIEGAVTAAVAAAPTVVVPRSS*KIX	Centric	Bacillariophyta	Coscinodiscophyceae	Chaetocerotales
MATOU-v2.90165449_3	90165449	MDGGDVDGLRLTTTSQGAANKVLDDPDFSFIKALQTAQQNFVVTDPSLPDNPIVYASQGFLNLTGYSLDQILGRNCRFLQGPETDPKAVERIRNAIEHGMDLSVCAIEHGMDLSVCLLNYRVDGSTFWNQFFIAALRDASGNITNFVGVQCKVSDTYAASVIKEQQRED	Pennate	Bacillariophyta
MATOU-v2.90165449_3	90165449	MDGGDVDGLRLTTTSQGAANKVLDDPDFSFIKALQTAQQNFVVTDPSLPDNPIVYASQGFLNLTGYSLDQILGRNCRFLQGPETDPKAVERIRNAIEHGMDLSVCAIEHGMDLSVCLLNYRVDGSTFWNQFFIAALRDASGNITNFVGVQCKVSDTYAASVIKEQQRED	Pennate	Bacillariophyta
MATOU-v2.90369268_4	90369268	ALVRSDFQLMASLSSGQQNFVLSDPRLPDNPIVFATAGFYNLTGYTQEQVLGRNCRFLQGPGTNPKTVDIIRKAVAT	Pennate
MATOU-v2.90393151_1	90393151	KTTAAVPFKEAPQQRHHLQYASTSKKKSSRSSERKMSEQQKNERRERNREHAKRSRIRKKFLLESLQQSVAMLKEENDKLRSSIRKHVGDEQAERLLEQKMDGSNGDMRLTTQSQGAANKVLDDPDFSFIKALQTAQQNFVVTDPSLPDNPIVYASQGFLNLTGYSLDQILGRNCRFLQGPWVEIAGSCKAQKQIRRQSNESVMLSNLDTILVCAC*ITESTDPHFGTNSSLRPSATLPETSLTLLVFNAKSVTPMQHRSSRNNRKKKKSSSNSNKMVQQVTFNRNKKP*NTRPMKS*NNSTHFX	Pennate	Bacillariophyta	Bacillariophyceae	Bacillariales
MATOU-v2.90393151_3	90393151	NHSGCPLQRGTPATASPPVCFDEQEKVFPFERTQDERTAEERTA*TKS*TRQKKPHSQKVFVGVITAKRGDAEGGK**APVLNPEARW**TSRKAPRTKNGRF*RRYEVDHSIARCG**GIRRS*LLVHQGLANGAAKLRCYRPFPAGQSYRLCFTRFFEPYRLLARPDFGSKLPVLARPLGRNCRFLQGPETDPKAVERIRNAIESGHDLSVCLLNYRVDGSTFWNQFFIAALRDAAGNITNFVGVQCKVSDTYAASVIKEQQKEEEEQQQQQQDGATGDVQ*KQEAVKHTTNEKLK**YTFY	Pennate	Bacillariophyta	Bacillariophyceae	Bacillariales
MATOU-v2.90397529_4	90397529	VLSNLPKTKVEKKRRPRR*FDPTFSSLIV*VLGSKTLFYRTLAYQIILFFATPGFYKLTGYTAEQVLGRNCRFLQGSGTDPKTVDIVRKAIQSGSDCTVCILNYKADGTPFWNQFFVAALRDSDNCIVNYVGVQTEIEPDAGANALEDRVNAVMPLANKD	Pennate	Bacillariophyta	Bacillariophyceae	Bacillariales
MATOU-v2.90406159_2	90406159	RNREHAKRSRIRKKILLESLQQSVSLLKEENDKLRSSIRQHLGDATADELLTKENLANTNVNSLIASSSKDANKVLDDPDFSFIKALQTAQQNFVVTDPSLPDNPIVYATQGFLNLTGYALDQVLGRNCRFLQGP	Centric	Bacillariophyta
MATOU-v2.90485346_5	90485346	DPKAVEHIRKAIEQGNDMSVCLLNYRVDGTTFWNQFFIAALRDASGTVTNFVGVQCKVSDQYAATVTKQQEEEDNA*X	Pennate	Bacillariophyta
MATOU-v2.90489002_5	90489002	LDQVLGRNCRFLQGPETDPKAVEKIRRSIEEGSDMSVCLLNYRVDGTTFWNQFFISALRDAAGNITNYVGVQCKVSDQYAANVCKKQEEEFSNADTAVELQPNPGAALSSSSSIQNNTNGIAHVEATPHAPAAAPPQTKSAGMYMSGATLDGSGDATMQ*GNLI**CILYF*Q*AQTEDLWRGGMISMRPEP*LLASSRYILGTINIHEC*LKYX	Centric	Bacillariophyta	Coscinodiscophyceae	Chaetocerotales
MATOU-v2.90549349_2	90549349	PKTVDIIRKAVATGADCTVCILNYKADGTPFWNQFFVAALRDSENCIVNYVGVQTEVEPDYGANALEDRVNAVLPLANX	Pennate	Bacillariophyta
MATOU-v2.90576772_3	90576772	PEVSKKLLSECKAMEKLPSAVQEAVGESATDMNSQDFNLVHSIQRSQQCFVITDPSLQDNPIVYASDDFLTLTGYQRTX	Pennate	Bacillariophyta	Fragilariophyceae
MATOU-v2.90682086_2	90682086	DEVLGRNCRFLQGVDTCPEKVDMIRKSLAEGEDVKTCFLNYTADGTPFWNQLFIAALRDTQNNIVNYIGVIVKVAGPPPDDSEYGKETGEKSLVDNEVKIKEEX	Centric
MATOU-v2.90812112_1	90812112	VSDGFLALTGYRLDQVLGRNCRFLQGPGTDQKAVDVIREGVEKGIDSSVCMLNYKADGTPFWNQVFVAALRDAKNNVVNYIGVQCEVG	Centric	Bacillariophyta
MATOU-v2.91836650_2	91836650	NDSGAYDIDINELFHDCYFEEYNPTLEEDHRIPSLAPPNTNSNLTNGGVGGKAISVVDSGVLPDIVASNINNSNNILPQKRGSPEVDTNELPPFNTTNIVHPQPIVSIAPMQQQLQAQVIPQAAVTTAVQYPFQQPVVPAPTTSSFSSATSTAKLTEQQKLERRERNREHAKRSRLRKKFLLESLQEQIHGLQSDIEKLTSVIRKELPSKAEVLLRDMQLSTDVSNTGLGGNNPNPNGTQYKPVNMPSGFGPVKTLIEPDFRLMFSLSNSQQNFAISDPSLPDNPIIYVSQGFLDLTGYTLDQVLGRNCRFLQGPGTDQAAVEVIRKGMKEGVDTSVCLLNYKADGTPFWNQFFVAALRDANNNIVNYVGVQCEVSKAVVESHLEHLNIDDSKNTVTAT…	Centric	Bacillariophyta
MATOU-v2.91859628_4	91859628	CSVKKSQQCFVITDPSLYDNPIVYASDDFYSLTGYTRDEVLGRNCRFLQGKDTSKDKILSIKTAISRGEDVGVCMINYTSQGIAFWNQLFIAALRDTQGNVVNFIGVLVKVQSPPNDDPEYGKPLINDMQNDNITQEE	Centric
MATOU-v2.91894079_1	91894079	EQAIAERRQRNREHAKRSRVRKKFMLESLQEQVQKLQKENQTLRLLIQESIPDHAQEIISECCSKNPLFADDDVNPDGSNENKVTKLIRSDFSLMDSLSASQQNFCLSDPRLPDNPVVFASPGFYKLTGYTSKEVLGRNCRFLQGPGTCFLQGPGTCTKTVDVIRKAVARGADCTVCILNYKADGTPFWNQFFVAALRDSDNNIVNFVGVQCEVEPEAGASALEDRVNEVLPLANKDSDQ*MSSHFVGFLTVSV*YDTLILHEIKKLYCSRNYS*S*IFYX	Pennate	Bacillariophyta	Bacillariophyceae	Bacillariales
MATOU-v2.91894079_1	91894079	EQAIAERRQRNREHAKRSRVRKKFMLESLQEQVQKLQKENQTLRLLIQESIPDHAQEIISECCSKNPLFADDDVNPDGSNENKVTKLIRSDFSLMDSLSASQQNFCLSDPRLPDNPVVFASPGFYKLTGYTSKEVLGRNCRFLQGPGTCFLQGPGTCTKTVDVIRKAVARGADCTVCILNYKADGTPFWNQFFVAALRDSDNNIVNFVGVQCEVEPEAGASALEDRVNEVLPLANKDSDQ*MSSHFVGFLTVSV*YDTLILHEIKKLYCSRNYS*S*IFYX	Pennate	Bacillariophyta	Bacillariophyceae	Bacillariales
MATOU-v2.91916744_5	91916744	FLTLTGYTLDQVLGRNCRFLQGPGTDQSAVEVIRRGIKEGVDTSVCLLNYKADGTPFWNQFFVAALRDAENNVVNYVGVQCEVSKAVVEKHMDDKKKRPS*LLSIWLLPL*I*MLTMLI*SPEESYSVYLRMHLYVKNSISICFAAAVIVKLYANR*VEKRGLLN*NICLLRFSVMLLQVLQKNEDNHTTILNGSICYPISGFRTRIQNLVV*QLNCLTTSSX	Pennate
MATOU-v2.92002967_6	92002967	GTDTSVCLLNYKADGTPFWNQFFVGALRDADKNIVNYVGVQCEVSKAVVDTQTLKI*EDYRNKSTSLAGRGTLVSFDLYKIC*CQVM*IVY*IAX	Centric	Bacillariophyta
MATOU-v2.92046819_1	92046819	SLQDNPIVYASDDFLKITGYSRDDVLGRNCRFLQGTDTNPEKVEMIRKSLLEGEDVRTCFLNYTADGTPFWNQLFIAALRDTQNNIVNFIGVIVKVAGPPPDDIEYGKQESADNEVKPEGDDVNEDEVAGDVSD	Centric
MATOU-v2.92211740_1	92211740	RNALKSHLGEEKGGKVLDKSSEAVTPADSLLAASQGAANKVLDDPDFSFIKALQTAQQNFVVTDPGLPDNPIVYASQGFLNLTGYSLDQILGRNCRFLQGPETDPKSVEKIRKAIEAGNDMSVCLLNYRVDGTTFWNQFFIAALRDASGNVTNFVGVQCKVSDQYAATVVSQQDEAA	Pennate
MATOU-v2.92222189_4	92222189	DVLGRNCRFLQGPETSQSKVAMIRKGVENGNDVSVTFVNYTADGEAFWNKLFIAALRDAQNNIVNFIGVIVKVAGPEPNDPEA	Centric
MATOU-v2.92267499_1	92267499	RKKFLLESLQQSVGLLKEENEKLRNAIKSNLGVDQAEKLFRQKGGAGDDGLAASTQGIANKVLDDPDFSFIKALQTAQQNFVVTDPSLPDNPIVYASQGFLNLTGYSLDQILGRNCRFLQGPETDPKAVEHIRKAI	Pennate	Bacillariophyta	Bacillariophyceae	Naviculales
MATOU-v2.92362889_5	92362889	DITANSSVLKGTSSTQADSVQDAPGGKKQKNQAQIDRRRERNRILARRTRLRKKFFFESLQKEVTDLQRENTVLKEIVKAKLDAEVADAVLADCHVGDLX	Centric	Bacillariophyta	Coscinodiscophyceae	Coscinodiscales
MATOU-v2.92374088_4	92374088	SVCLLNYRVDGTTFWNQFFIAALRDASGTVTNFVGVQCKVSDQYAATVTKQQEEEDA*ITGL*LR***EYCPNRMTF*WQK*EWQS*VTFDGLVY*M*LL	Pennate
MATOU-v2.92434632_1	92434632	ILKEIVRSRVNSKDAKLILDSCNANEQLPSCVIEQCGDMSNLDKQDFNLIQSIQKSQQCFVITDPSLQDNPIVYASQDFLSLTGYARDDVLGRNCRFLQGPETSQVKIKQIREAVTAGSDVTVTFVNYTADGTPFWNKLFIAALRDAQX	Centric	Bacillariophyta	Mediophyceae	Hemiaulales
MATOU-v2.92453641_4	92453641	DFNPMASIKNSQQSFVITDPSLQDNPIVYASDGFLELTGYSREQVLGRNCRFLQGTDTDPAKVAEIRKGLENGDDVSVTFLNYSADGTPFWNKLFIAALRDAHNNIVNYIGVSVKVAGDHENNNASAQNASYNNSHQNGSYMDGNGNGVVDFDATVQALEGAVEKAVAAAPNIVKNASS*ASCIPIS*NYRKQVAFRF*DALIHLLPHTSCLF*RVLWEAFKNLQL*NMINK*KINCEIYSC	Centric	Bacillariophyta	Coscinodiscophyceae	Chaetocerotales
MATOU-v2.92693771_3	92693771	KADGTPFWNQFFVAALRDAENNVVNFVGVQCEVSKAVVESQMPNKKPETV*RVQYEA*KDVVEFLMFNRNFCYHLCFTYAKLSFWT*MYELQLFQ*KRKGRYVEKG*KAGLEELVVDGMNVTNFYFFN*FPI*Y**ALPYX	Centric
MATOU-v2.93084732_5	93084732	RKGVREGTDTSVCLLNYKADGTPFWNQFFVAALRDAENNVVNFVGVQCEVSKAVVEKHISDGKTPMPPGGT*ENFWGEKRX	Centric	Bacillariophyta	Coscinodiscophyceae	Thalassiosirales
MATOU-v2.93091779_6	93091779	EQQIAERRQRNREHAKRSRVRKKFMLESLQEQVRSLQKENVELRMLIQEKIPDKAQSIISECCSKNTLFSDPSAEDSDKKTKKDTTSLERSDFTLMESLTSGQQNFVLSDPRLPDNPIVYASPGFYILTGYTPEQVLGRNCRFLQGPATDPRAVDIIRKAIASGADATTCILNYKADGTPFWNQFFVAALRDSDNCIVNYVGVQCEVESEAGASALEDKVNSVLPLAEKEGGKPEEAPLVP*YSDASSKTNFLQRC*NWHTFKLVGKGF*SIKVLCTEYFNLIDQRLP	Pennate	Bacillariophyta	Fragilariophyceae	Thalassionemales
MATOU-v2.93176904_2	93176904	LNYKADGTPFWNQFFVAALRDAENNVVNFVGVQCEVSKAVVEKQILEQQKAGNDDGMKS*LM**LIVNKSEKKRTCKLCMM*K*AERYN*SEV*EYSSIDIG	Centric
MATOU-v2.93187182_5	93187182	RLMSALSGSQQNFAISDPSLPDNPIVYVSQGFLDLTGYKLDQVLGRNCRFLQGPGTDQSAVEVIRRGIREGVDTSVCLLNYKADGTPFWNQFFVAALRDAENNVVNFVGVQCEVSKAVVEKQMAEGKMPTSAK*GTGGTNMVCYGQLSALGLDFSLYVFSCL*I*QNCYDQLFQX	Pennate
MATOU-v2.93220229_3	93220229	KTLIEPDYRLMTSLSGSQQNFAISDPSLPDNPIVYVSQGFLDLTGYTLDYVLGRNCRFLQGADTDQG	Centric	Bacillariophyta	Coscinodiscophyceae
MATOU-v2.93349902_2	93349902	SPLLGLTDRTPTRR*WGKQLLRRRRRRHLSLRLRNGPITYSMRMFRPVARQLHRQFQPPWRRPRRLLRHQMRERNGP*RHLQQRNHPWKKSPWLLESLQQSVSLLKEENAKLKNAIRTHLGEKEAEALLNKQALADAASSGVGGLIANNKSDANRVLDDPDFSFIKALQTAQQNFVVTDPSLPDNPIVYATQGFLNLTGYTLDQVLGRNCRFLQGPETDPKAVEKIRNAIEEGSDMSVCLLNYRVDGTTFWNQFFIAALRDAGGNITNYVGVQCKVSDQYAASVCKKQDEADAAAAPSKASGGLKSDS*RMSFRFGHFCISCCM*RRG*EDRKA	Centric	Bacillariophyta	Coscinodiscophyceae	Thalassiosirales
MATOU-v2.93350437_5	93350437	IRFGPSGIAPETAKASLPSRSLALWPTGTGTMSEQAIAERRQRNREHAKRSRVRKKFMLESLQEEVRGLQKENQRLRMLVQEHIPGNGMKIISECCQDSRLFKDGDMGEQTGGPKPSGPLERSDQNLMTSLSSGQQCFVLSDPKLPDNPIVYASPGFYQLTGYSSKEVLGRNCRFLQGPGTDDKAVKVIKKAIETGSDATVCILNYKSDGTAFWNQFFVAALRDSDNCIVNYVGVQCEVEADAGQTALEDRVNAVLPLQSKDGEMEGEGGP*TIYHHFSKQRPQQ*TTTYYICDAENAEIAIVFCVIIILF*IHX	Pennate
MATOU-v2.93350654_6	93350654	RTHLGDEKAERLLSNNTDAASSDGLLANSQGTANKVLDDPDFSFIKALQTAQQNFVVTDPSLPDNPIVYASQGFLNLTGYSLDQILGRNCRFLQGPETDPKSVEKIRKSIEEGTDMSVCLLNYRVDGTTFWNQFFIAALRDSGGSITNYVGVQCKVSDQYAATVTSYRHQAAGGGRRRRRCDRRCRQCGRGRQCGRCRLGKL*LYEFCFGLSVKLTQETNAIQLTA*IIEMKNEFGE*WINLD*AKNLWYPVVECVNRSFEAIYLNLRTHDD*DTL*FFVNIILX	Pennate
MATOU-v2.93364301_3	93364301	VITLPYRIMSEPSATTNNAPNFQPAANADGANIDLDDLFNDIYYAELPIPSIPCSIPAPDSGGAAAASDQKKRSAEDAGIATNGTDQKPEKATSAAATTTKGMTEQQKLERRERNREHAKRSRLRKKFLLESLQEQIHGLEEQIDSFKKCISDQLPDKAEELIGRICGDKEKYTPLPMPSGFGPVKTLMEPDFRLMSALSGSQQNFAISDPTLPDNPIVYCSQGFLDLTGYTLDQVLGRNCRFLQGPGTDQSAVDVIRKGIKEGVDTSVCLLNYRADGTPFWNQFFVAALRDAQNNIVNYVGVQX	Pennate
MATOU-v2.93378045_6	93378045	SNTSGAVGPGGKPELTEAQKIERRERNREHAKRSRLRKKFLLESLQEQIHGLQGEIATLKNIIKSELGEIATLKNIIKSELPDRAEELLKKVGSAEASEFTPVPTPSGFGPVKTLMEPDFRLMKALSGSQQNFAISDPSLPDNPIVYVSQGFLDLTGYTLDQVLGRNCRFLQGPGTDQAAVDIIRKGIREGIDTSVCLLNYRADGTPFWNQFFVAALRDAENNVVNFVGVQCEVSKAVVDQX	Centric	Bacillariophyta	Mediophyceae	Cymatosirales
MATOU-v2.93422344_2	93422344	QNFAISDPTLPDNPIVYVSQGFLDLTGYTLDQVLGRNCRFLQGPGTDQSAVDVIRKGIKEGIDTSVCLLNYKADGTPFWNQFFVAALRDAANNVVNYVGVQCEVSKAVVEKHMGPERKK*NGGKSKISQRLQRKNQP*YSQQYQLFQFYCSX	Pennate	Bacillariophyta
MATOU-v2.93426624_4	93426624	SLQPSVSEMM*TRPRTSPARLISSCNYYGSSSNSSYRGTKRSRHPME**QLSRLL*PRRQLELVDWPIGLDSPFLGFTLPTSNAHATSNGVQAAVQAAASGINLPVGIGLRFGAGGISQQQTLQNFGANTSVLQAAIGGGPLHVTNVQYGVNPLQQQHVATQNLNPEEATQTERRLRNREHAKRSRVRKKFMLESLQQQVKGLQDENGTLRLLVQKHIPKHALKIIDECCSKSILFRTADGANAGKKGDKDAKETPLLRSDFSLIESLTSGQQNFVLSDPRLPDNPIVFASPGFYELTGYTREQVLGRNCRFLQGNGTDRKAIEVI	Centric	Bacillariophyta	Coscinodiscophyceae	Thalassiosirales
MATOU-v2.93455179_2	93455179	AVAAGVAAASSAPTAVADKKRSAEEADLDNGGGTKELTDKQKLERRERNREHAKRSRLRKKFLLESLQEQIHELQEQMDKMKDALRREAPDRAEGILSAILGNKDKYTPLPMPSGFGPVKTLMEPX	Pennate
MATOU-v2.93721402_2	93721402	REVPIRTVAIAPLAVASTDSVWHTQHGRRERHK*PNVRREANSARNCLQTCRPRSLSLVLYPHRQR*RRVTPSTMLWGKLPLAEILSTSICWRSTSSTMELLPAT*ASTLTSARKRRPWPKAITAPPLCHLTSRLRYPSPILWQTQRSVCARPQQGPRAILLETLLKCST*SQRKPKLRSKGLDPRRPLL*LAMGARFLHLYT*IILERQ*TGPVFP*QRRLTLISADEWTLLLPSSPVDVAAPVVAGSSVAPVMSANGLMIPPNIPRGGRQKSQAQIDRRRERNRILARRTRLRKKFFFESLQKDVTDLQHENALLKEIVRRRLKPELSKGILEKCKANEALPSIVAEQTSELNQRDSTFIQSVQNSKQX	Centric	Bacillariophyta	Mediophyceae
MATOU-v2.93818258_6	93818258	SRIRKKFLLESLQQSVTMLKEENETLRNSLREELGDEADELVKKENLAAAAAAPGLIGTSSDSSKVLDDPDFSFIKALQTAQQNFVVTDPSLPDNPIVYATQGFLTLTGYTLDQVLGRNCRFLQGPETDPKAVEKIRRAIEEGSDMSVCLLNYRVDGSTFWNQFFIAALRDAAGLVTNYVGVQSKVSDEYAANVCKRQTEMDRAAAAKEEDDQDQDQDQDQDQGMQ*VSLRAHLFRTSVRALLRFTWRVVGSMELKRQMET*YT*CSHVWMGLYCS*ITX	Centric
MATOU-v2.93945082_1	93945082	ESLQGQIEGLQSEIHSLKDIIRRELPGKAPDLLRGFGDGEGDKNDPSQPKKGAYTPLPMPSGFGPVKTLMEPDYRLMSALSGSQQNFAIADPSLPDNPIVYVSQGFLDLTGYTLDQVLGRNCRFLQGPGTDQAAVDIIRKGVQEGVDTSVCLLNYKADGTPFWNQFFVAALRDAENNVVNFVGVQCEVSKAVVEKHITEGKTPASAMPGS*IWGTAFFSMS	Centric	Bacillariophyta	Coscinodiscophyceae
MATOU-v2.94099783_6	94099783	TNPKTVDIIRKAVATGADCTVCILNYKADGAPFWNQFFVAALRDSENCIVNYVGVQTEVEPDYGANALEDRVNAVLPLANKDDEDEDGEGLTKES*SNVRFQ*AANLKEISRCRRGSFRKR*ETREWNL*NSARLLNATTGFVA	Pennate	Bacillariophyta	Bacillariophyceae	Bacillariales
MATOU-v2.94173277_5	94173277	SRCSNKSPHYNARIKNYVCWSRTTSQNTRS**YRSAAHQALSLQMEH*TTILNPVEKKEAMKWKNLL*FVQIFSS*TA*VLVNKILFYQTRLPDNPIVFATPGFYKLTGYTAEQVLGRNCRFLQGSGTDPKTVDIVRKAIQFGSDCTVCILNYKADGTPFWNQFFVAALRDSDNCIVNYVGVQTX	Pennate	Bacillariophyta	Bacillariophyceae	Bacillariales
MATOU-v2.94609212_5	94609212	FWNQFFIAALRDASGNITNFVGVQCKVSDQYAASVTKEQEAEVAVVEEE*ISSTSPS*IFLHRSITGVDKSNVLTE*SKTNV*SSSKQRKETT*ELAINGX	Pennate
MATOU-v2.95038815_2	95038815	VCLLNYKADGTPFWNQFFVAALRDADNNVVNFVGVQCEVSKAVVESRIEEQSQSKV*R*SVPLYLAFSDNT	Centric	Bacillariophyta
MATOU-v2.95204753_2	95204753	AVIEQCGDPRMLAKQDFNLMASIRQSQQCFVITDPSLQDNPIVYASDDFLTLTGYSREEVLGRNCRFLQGTDTNQNKVAQIRKAISNGEDVSVTFVNYKSDGTPFWNKLFVAALRDAQSNVVNYIGVSVKVAGPEPGDPEAGKVLVGEKVNSSAEDTQVDTNVG	Centric	Bacillariophyta
MATOU-v2.95257159_3	95257159	LMSSLSNSQQNFAISDPSLPDNPIVYCSQGFLDLTEYTLDQVLGRNCRFLQGPGTDQSAVDVIRKGVREGIDTSVCLLNYKADGTPFWNQFFX	Centric	Bacillariophyta
MATOU-v2.95311179_5	95311179	SIEEGIDMSVCLLNYRADGTTFWNQFFIAALRDAAGNITNYVGVQCKVSDQYAANVCKKQDEEFAQAEAQAQSSDATKPQPMTADSLNVAAPAVPMKMEEASNP*LMIRM*RKAVCKRSDX	Centric
MATOU-v2.95340238_5	95340238	HGEGLDQKDFSLVKSLKASQQCFVISDPSLQDNPIVYASDDFLSLIGYSRDEVLGRNCRFLQGPDTDKTKVEKIRKAIAEGEDVSVVLLNYKADGTPFWSQLFIAALRDTQNNIVNFIGVVVKVAGPPPEDPESNKIHDGEDSNDDITASPTADSEGAVPTSSGVAPCTIEAVSNTTEVVVPSDVLAQHSSTPSDTSS*KKFPFIRGPKSKTNPPSQGFVALFISILTNYILRVSSMDDNTV*X	Centric
MATOU-v2.95376019_3	95376019	LTFALID*SLEHQGLILGIDNYVFSEHSVSKVCSE*CSVIVVKYVRSRQFGC*SSGGIPLKRWTAEHGE*RGL*LQS*HKHKGISGNVRCFSRKQRRGKCAN*CTRCGRSN**WRRYYS**RTNSTNITVWSPIRHPTGSCTHDPTSKPIAIIDSNNTQHQRCNRSAGSKLYNTVAREPS*APSC*SKHPTDGSCTRDSKSNVRQL*RDLASSSNCNP*FFKGW*EEISSPDRSPARA*SHLGSENSSPEEVLLRGSAEGWRENRMLKQVVKSNIAGDAGQQILDSCDAFKKLPDGVLETCGENSAEYTGEDFNLVQSIKGSQHSFVITDPSLPDNPIVFASDDFLKLTKYNRX	Pennate
MATOU-v2.95541511_4	95541511	NGDRNELSILVPF*LFN*LHVYHSE*RKRDRDPLEAAPN*SQPSCFYTTNHQAPRTNLESKLTGMSAAPPNPQPNSAANGTGNEAPVPMFQMSNVNVADTGAGSCDNSIIGGTGGGIDIGQLDLEELFVDCYYDVPGMAEMIKNEPANGSVDAATLPAPVAAQQAVIPGQQVSPATAPVTVVPPPMVTGDPSASSRTINPPQPSAVTSTTTSISTGNKKRSADEIITGEDGDEKTSGGQLTAKQKLERRERNREHAKRSRLRKKFLLESLQEQIHGLQEQLDKFKKTIRSEIPAPKAESLIDEICGHENEYTPLPMPSGFGPVKTLMEPDFRLMSALSGSQQNFAISDPTLPDNPIVYVSQGFLDLTGYQLDQVLGRNCRFLQGPGTDQSAVDVIRKGI…	Pennate	Bacillariophyta	Bacillariophyceae	Bacillariales
MATOU-v2.95541512_4	95541512	AMVTGMNSLF*FRFNCLISYTSIIQSEGREIEIR*RQHRINHNPVAFTQPTTKHHGQIWNQN*QVCLPRLQILNPTVPPTEPETKHLFQCFRCRMSTCSNVSDVECRKFFISKREMNINRPNANSSFEN*KI*TQLPSCFNLQSVHLFIFRFSTLHTPPLFLFKTSKIDHNQTLKPNQSNQNVADTGAGSCDNSIIGGTGGGIDIGQLDLEELFVDCYYDVPGMAEMIKNEPANGSVDAATLPAPVAAQQAVIPGQQVSPATAPVTVVPPPMVTGDPSASSRTINPPQPSAVTSTTTSISTGNKKRSADEIITGEDGDEKTSGGQLTAKQKLERRERNREHAKRSRLRKKFLLESLQEQIHGLQEQLDKFKKTIRSEIPAPKAESLIDEICGHENEYTP…	Pennate	Bacillariophyta	Bacillariophyceae	Bacillariales
MATOU-v2.95544678_6	95544678	IFGSNSSQHPQQAGQQQQDGAEWYPPMDDGDQDVDFDLLAEYLLEENPTLNQTGGASFDFNNEYLVSPEQSVDGAGDSGAAQARDIITQHAANIATSLNSSSAPAVASSSKPNKTQQEQQVVYAPVAAPPLIVAPPAPPQIAAQGMAVPRTIMQYPSQPEMAPAAAISSSSAEQGTKTKTKIPIKTAQKKTGGAATEAKRRRTNPPEVAAQGLINTSYLTNPTNMSPAVVAAAAAAAAMQGRGGRKKTQAQIDRRRERNRILARRTRLRKKFFFESLQKEVMELQRENAALRDIVRTEVDSEDGRKLLEQCNATRQLPREVLEACGENPDLDQEDFNLITSIQQSQHSFVITDPSLQDNPIVFASDDFLTLTGYSREDVLGRNCRFLQGAQTSKEKLDL…	Pennate	Bacillariophyta	Bacillariophyceae	Bacillariales
MATOU-v2.95554573_6	95554573	PMFTTDLSAPTQAAVAQRGTPATLNLDDIFGDVMFTPDGDTVFLNEEQDVLGSEEKQVTNNATKIQGHQAVPVPRGGGFYTTQLHDNTKPALTMGNIVPGVTKTTSAVPFKDAPQQRHHLQYALSSSSGKKKSSRSNERKMSEQQKNERRERNREHAKRSRIRKKFLLESLQQSVAMLKEENEKLRDSIRNHLGEEQAKKLLEEKMDGNNGDLRLTTLSQGAANKVLDDPDFSFIKALQTAQQNFVVTDPSLPDNPIVYASQGFLNLTGYSLDQILGRNCRFLQGPETDPKSVERIRHAIENGADLSVCLLNYRVDGTTFWNQFFIAALRDASGNITNFVGVQCKVSDTYAASVIKEQQKEDEERAAEQQRQEQQKEHKPQQIQQQPKQEVQQQQIQQQ…	Pennate	Bacillariophyta	Bacillariophyceae	Bacillariales
MATOU-v2.95567599_2	95567599	MNFKLNIDL*MQTTYNTFILAFTT*LDLKYQQSNYLHSAKPCFLIFEQSLFGGVSPPQIPVSTITLLLSSIKLQHSN*IGSVRNSCRFLDNTDLEEVCAY*FNFL*DRFITTIP*TFKQDYLLDHY*YLSTTIYRIIIIVPKRFLIISFHRFKPSHFNH*NRFSLPQGVCLNMSHGIQQPLFASASTQGQGDDFDLNEIFAEYFISEFENPVNAYTNAMGNYVAAPGNAASATVTQTAAPTVTSINTFAPTLATATTVQQPLQLSGLSSGIRTEYHSAVNAPAVSTPLESVQPQQQLTPSKGGLPIAKKPKLEPGTATKLPVVTTANVAATGGVTSRLGFNTENLQQGSMSAVQANPSSLATLAQQQQSSGVSLPVGRGIRLGGTGGVAPATARKVPGV…	Pennate	Bacillariophyta	Bacillariophyceae	Bacillariales
MATOU-v2.95567600_2	95567600	MNFKLNIDL*MQTTYNTFILAFTT*LDLKYQQSNYLHSAKPCFLIFEQSLFGGVSPPQIPVSTITLLLSSIKLQHSN*IGSVRNSCRFLDNTDLEEVCAY*FNFL*DRFITTIP*TFKQDYLLDHY*YLSTTIYRIIIIVPKRFLIISFHRFKPSHFNH*NRFSLPQGVCLNMSHGIQQPLFASASTQGQGDDFDLNEIFAEYFISEFENPVNAYTNAMGNYVAAPGNAASATVTQTAAPTVTSINTFAPTLATATTVQQPLQLSGLSSGIRTEYHSAVNAPAVSTPLESVQPQQQLTHSKGGLPIAKKPKLEPGTATKLPVVTTANVAATGGVTSRLGFNTENLQQGSMSAVQANPSSLATLAQQQQSSGVSLPVGRGIRLGGTGGVAPATARKVPGV…	Pennate	Bacillariophyta	Bacillariophyceae	Bacillariales
MATOU-v2.95591646_2	95591646	YKADGTPFWNQLFVAALRDGDNCIVNYVGVQTLIEPNAGASALEDKVNAAHPISVGVADDTDDKAAKK*YRGTWYLFHFVHSYPKFEEICCLESKFQFGIIAGRYHLCT*CLRLQNDWGA*THVYIIELSYRWQKX	Centric	Bacillariophyta	Coscinodiscophyceae	Thalassiosirales
MATOU-v2.95642320_2	95642320	PSPKQGGSIRQVYRNRTPLLQWGISAVMQHHLLSLSRKLHNVRITCNTLI*KPVAPRFLRQRLEPLQRELRNDQGVRGLQVG*S*MDRIRQIEVNL*RNATASMLSAPVFVRSLFLLESLQQSVSLLKEENEKLKSAIRNHLGDKEADNLLSKQALADAAGAGGGLIASNSADANKVLDDPDFSFIKALQTAQQNFVVTDPSLPDNPIVYATQGFLNLTGYTLDQVLGRNCRFLQGPETDPKAVEKIRTAIEEGSDMSVCLLNYRVDGTTFWNQFFIAALRDAGGNITNYVGVQCKVSDQYAANVCKKQEEADMTAAASEVDGAGLKQES*WRNYNFK*TLPKRGGFQVLARNNVAAQQT*YFVHETFTHLVFIQLTIX	Centric	Bacillariophyta	Coscinodiscophyceae
MATOU-v2.95975755_3	95975755	PVMPARQPLSRCKKAQ*QK*LLWI*TMSDNRTQTQDGNGNIRPPQFIAAGVPGLSASTSAAVQTRGTPSTLNLDDIFGDCFFTPEGEAVFLSENPQLQQQLQQQKKLTQQQQQLSQQPQEQQQGAILGSGEVTVSQNASRPTAEGAGYTPVPQAGGISTTGLQKRDGPAATMGTISGNAAPTTVPMAQSPQRPHHLQYAYVKAGGTQAPASASVDGTASTGAVKRSRSGGSISGVAKGDGSNKTDRSKLVKERNREHAKRSRIRKKFLLESLQQSVSLLKEENEKLKGAIRSHLGDKEADNLLSKQALADAAGAGGGLIASNSADANKVLDDPDFSFIKALQTAQQNFVVTDPSLPDNPIVYATQGFLNLTGYTLDQVLGRNCRFLQGPETDPKAVEKI…	Centric	Bacillariophyta	Coscinodiscophyceae
MATOU-v2.95975756_2	95975756	RQIEVSL*SKSILAEGFGH*SS*TNHVIL*NYCQYSTTCCSILSDRALIDSAVNTPRERNREHAKRSRIRKKFLLESLQQSVSLLKEENEKLKGAIRSHLGDKEADNLLSKQALADAAGAGGGLIASNSADANKVLDDPDFSFIKALQTAQQNFVVTDPSLPDNPIVYATQGFLNLTGYTLDQVLGRNCRFLQGPETDPKAVEKIRTAIEEGSDMSVCLLNYRVDGTTFWNQFFIAALRDAGGNITNYVGVQCKVSDQYAANVCKKQEEADMAAAASEAGGVGLKQES*WHMTNITQKGAVF*NMW*HNKHVISCWPSTPLDPQTYFY**CIPNKKADGT*PTLPKRGLFSETCGSTINMLFRAGLAHLWIX	Centric	Bacillariophyta	Coscinodiscophyceae
MATOU-v2.95980320_1	95980320	VYD*FICNTFFLML*ISLSLSVLQNMGMQMPMFAAANQQAAASDELDLQDIFADYFNDDGTGNITNANAAADLFSNALFAQQQQQQLQQQQQVVAHHAQQQQLQQQVNQQQQQHQLAVSHQQQLAANAAAAVAQQHLSLPTGQGIQTAWHAGSLPVLQQQQQQQGSNNIISIQQPSAKRSKGEELFLPTSQQQQQNNIAGNGAGDGNIAITQQQYALAQAASGVGALSGRLGFSFPNNHTQQQQQVQVQQQVQQQAAAQGINLPVGIGVKFNPMGNIIPQGQVGVSGIQALANGNIAAPVGAINVAAFNNLTSMAMAGNSMTAATAQEILAASARSAGAANTQQTALGTAQSTVPSEDDITAERRLRNREHAKRSRVRKKFMLESLQEEVRKMQEENST…	Centric	Bacillariophyta	Coscinodiscophyceae
MATOU-v2.95980321_1	95980321	VYD*FICNTFFLML*ISLSLSVLQNMGMQMPMFAAANQQAAASDELDLQDIFADYFNDDGTGNITNANAAADLFSNALFAQQQQQQLQQQQQVVAHHAQQQQLQQQVNQQQQQHQLAVSHQQQLAANAAAAVAQQHLSLPTGQGIQTAWHAGSLPVLQQQQQQQGSNNIISIQQPSAKRSKGEELFLPTSQQQQQNNIAGNGAGDGNIAITQQQYALAQAASGVGALSGRLGFSFPNNHTQQQQQVQVQQQVQQQAAAQGINLPVGIGVKFNPMGNIIPQGQVGVSGIQALANGNIAAPVGAINVAAFNNLTSMAMAGNSMTAATAQEILAASARSAGAANTQQTALGTAQSTVPSEDDITAERRLRNREHAKRSRVRKKFMLESLQEEVRKMQEENST…	Centric	Bacillariophyta	Coscinodiscophyceae	Thalassiosirales
MATOU-v2.96073700_4	96073700	YQARRSHPPTPPSPLKLASMSSNITTTVPNPIPVEGAPKEAPPVAAAAEVADATPAVAVAPAAPVAATAPAAAVASGTNHAGASAMQLFAPDPNAGTDQDPLELDELFHDCYFGDFGVPEAVTSLSAPLVAPAPVAPIVAPNPAVKRTAEQAGLALTTTATASGAPSSLVPVPSSVHSSGASGAPSGSLLPAASLTESQRKERRDRNREHAKRSRLRKKFLLESLQEQIEGLQSEIHSLKDIIKRELPGKAPDLLRGFGDAEGDKDDPSQPKKGAYTPLPMPSGFGPVKTLMEPDYRLMSALSGSQQNFAIADPSLPDNPIVYVSQGFLDLTGYTLDQVLGRNCRFLQGPGTDQAAVDIIRKGVQEGVDTSVCLLNYKADGTPFWNQFFVAALRDAENN…	Centric	Bacillariophyta	Coscinodiscophyceae	Thalassiosirales
MATOU-v2.96089209_1	96089209	VVVCRNAVPGTASQRIDHGRQRRWGGEGGGAPQRHVAVRPGDAGRGRCRRRGERSRSRRALPRLLLRRLSDARRRCRRCRPSHRRGTSPAGQAQGGGDDGGVEAHVRHHRGRYRGKCGGNFHLSCRCRRSGTERCRTRRALEPNAVGPGGKPELTEAQKIERRERNREHAKRSRLRKKFLLESLQEQIHGLQGEIATLKNIIKSELPDRAEELLKKVGSADGSEFTPVPTPSGFGPVKTLMEPDFRLMKALSGSQQNFAISDPSLPDNPIVYVSQGFLDLTGYTLDQVLGRNCRFLQGPGTDQAAVDIIRKGIREGIDTSVCLLNYRADGTPFWNQFFVAALRDAENNVVNFVGVQCEVSKAVVDQQIKEGKMPAPVGGVTIT*GSSRSFVYALCDTLL…	Centric	Bacillariophyta	Mediophyceae	Cymatosirales
MATOU-v2.96192704_4	96192704	LMEPDFRLMSALSGSQQNFAISDPSLPDNPIVYVSQGFLDLTGYKLDQVLGRNCRFLQGPGTDQSAVEVIRRG	Pennate
MATOU-v2.96290482_6	96290482	YRLMSALSGSQQNFAISDPSLPDNPIVYVSQGFLDLTGYTLDQVLGRNCRFLQGPGTDQAAVDVIRRGVREGTDTSVCLLNYKADGTPFWNQFFVAALRDAENNVVNFVGVQCEVSKAVVEKHISEGKTPQSSLPLAK*VRIEGACPAAHMIWACLCFRCVVCWKIERLVDVVVVGGMHILTQGEQIKRQQRKKKQVWALCQGT*HLVLCEMCMYVYLFWA	Centric	Bacillariophyta	Coscinodiscophyceae
MATOU-v2.96348112_4	96348112	LDQVLGRNCRFLQGPETDPKAVEKIRNAIEEGSDMSVCLLNYRVDGTTFWNQFFIAALRDAGGNITNYVGVQCKVSDQYAASVCKKQDEADAAAATAKAIGGLKSDS*RMSVEARHFCISCCVSRRG*EDRRTT*IS*LT	Centric	Bacillariophyta	Coscinodiscophyceae
MATOU-v2.96357394_3	96357394	MIWGGPQMMGMSDQAVAERRQRNREHAKRSRVRKKFMLESLQEQVASLQHENQRLRMLVQDNIPEHAQMIISECCTSSPLFGDTDASSGPQVEDGEGKSKTTALVRSDFQLIDSLSAGQQNFVLSDPRLPDNPIVFATPGFYRLTGYTPEQVLGRNCRLTGYTPEQVLGRNCRFLQGSGTDPKSVDIVRKAIQSGSDCTVCILNYKADGTPFWNQFFVAALRDSDNCIVNYVGVQTEIEPDAGANALEDRVNAVMPLANKDDDTDEGK*KEI*LESQKHRVSRTPDDRKF*NIIAVWC*RCNC*PNS*VKSNT*ILFVPR	Pennate	Bacillariophyta	Bacillariophyceae	Bacillariales
MATOU-v2.96357394_3	96357394	MIWGGPQMMGMSDQAVAERRQRNREHAKRSRVRKKFMLESLQEQVASLQHENQRLRMLVQDNIPEHAQMIISECCTSSPLFGDTDASSGPQVEDGEGKSKTTALVRSDFQLIDSLSAGQQNFVLSDPRLPDNPIVFATPGFYRLTGYTPEQVLGRNCRLTGYTPEQVLGRNCRFLQGSGTDPKSVDIVRKAIQSGSDCTVCILNYKADGTPFWNQFFVAALRDSDNCIVNYVGVQTEIEPDAGANALEDRVNAVMPLANKDDDTDEGK*KEI*LESQKHRVSRTPDDRKF*NIIAVWC*RCNC*PNS*VKSNT*ILFVPR	Pennate	Bacillariophyta	Bacillariophyceae	Bacillariales
MATOU-v2.96474318_3	96474318	VVPR*EQEKGYYRLVCTEVCI*T*KADKIVSLFDMSVEVSNMPQYPPLPRFATSSSYEQQQQQQLTPDGMPNGSSTPATAALENVNYSAPATGVSSSACDTDFDLLAEYLLDDNTLNSSVVGFSSGGYYDVSSELSTYSNTSTQPVEDQSQVQAAPNPMINSSFSDPLADANAIYQQATTQDPLAQVLPLPPQPTMTTGAPQVQAQQQPVYVQQAAPVPQPTRNATTIVHHHHQQTVQQQQPQTVMLSGYKRPTPTDTNQQRPNQRYKSQAQLDKRRERNRILARQTRLRKKYFFESLQKEVMDLQYENLALKEIVKQNFPSEQIKNQILEECKLTENIISQNNQQINKDDTSNENKNLEDIDYHFICSVKKSQQCFVITDPSLYDNPIVYASDDFYSL…	Centric
MATOU-v2.96493641_2	96493641	QVLGRNCRFLQGSGTDPKSVDIIRKAIQSGSDCTVCILNYKADGTPFWNQFFVAALRDSDNCIVNYVGVQTEX	Pennate	Bacillariophyta	Bacillariophyceae	Bacillariales
MATOU-v2.96522262_1	96522262	SNLGVDQAEKLFRQKGGAGDDGLAASTQGIANKVLDDPDFSFIKALQTAQQNFVVTDPSLPDNPIVYASQGFLNLPGYSLDQILG	Pennate	Bacillariophyta	Bacillariophyceae	Naviculales
MATOU-v2.96584750_5	96584750	PIVYASDDFLTLTGYSQEEVLGRNCRFLQGTETCQEKVVQIRKAVCAGEDVNVTFVNYTSDGKPFWNSLFIAALRDADNNIVNX	Centric	Bacillariophyta	Coscinodiscophyceae	Thalassiosirales
MATOU-v2.96642438_4	96642438	EGGDGSRGEGGEGAPQDKDRDDIKETPLLRSDFSLIESLTSGQQNFVLSDPRLPDNPIVFASPGFYELTGYTREQVLGRNCRFLQGAGTDRKGIEVIRTAVANGTDATVCLLNYKADGTPFWNQLFVAALRDADDCIVNYVGVQTMIEPNAGASALEDKVNAAHPISVGVDGEEDSDGDKDKDAAK*SSLGERFLMLHFCSFDLYAVQCAPVFSLFLKED*SLPGAEAAGVHGCLVRCGGDAVRGGGRLTYRLMQYGSYSTEQCHEKQ*VFNNM*SS**F*GVLS	Centric	Bacillariophyta	Coscinodiscophyceae	Thalassiosirales
MATOU-v2.96644203_3	96644203	ENVSIEIESKFG*EMMANVSYQNNAIPSYVNDLIDDCRFSPEGEAVFLSEEGDERDIVASSEATPTTVASYVLEDGTAVPAKVAGGIAATNLDIPGMRSTAMGPSSKIFSNQAPFRQPPQKENHMGFATYRRGQTTKSQKPRRMSGEKQDERGGRREQAKRSRARKKLLLESLQQSVQQFKEENEKLKASLKFHLGEEAANKLLARHKSSSSVEVDKLGNKALDDTDSDFLKALETAQHNFCVTDPALPDNPIVYATQGFLNLTGYTLEQVVGRNCRFLQGPETDPAASDKIRHAIASGQDMSVCLLNYRADGTTFWNQFFITALRDAEGNIINYVGVQSKVSDDYAATVCKTQKGVNQ*DVLRIEIYTPAILHSIYSHCEK*NVGHNFKINRLGDA*P…	Centric
MATOU-v2.96644704_4	96644704	CLRT*MNCSMTVDSLQKEKRYFFPKKLITAI**RHQRQHRQQ*HHVFWKMEPKYLQRSLGE*KQQT*KIPS*NQQ*WVSHQKQDHPNQCRLSKHLKKRTI*VS*HLRMAGKRNLKKGEDQNINRKRRKRADQNRKIN*RKDGIANIQSDPKHVKSSYWKVYRRVYQLLREENEKLKESIKTHLGEETANKLLAAREDLIMKDDAPPGTSTNLVDEKKDIMAKFGGANKSLDDTDNDFIKALQTAQQNFCVTDPALPDNPIVYATQGFLNLTGYTLDQVLGRNCRFLQGPETDPVAVDQIRKAIAVGNDMSTVLLNYRADGSTFWNQFFIAALRDANDNITNYVGVQCKVSDEYAATVCKKQIEMEEEEDPIDQEGDDNEDGTGEQNQAEKSDEVVMKED…	Centric
MATOU-v2.96659521_5	96659521	KDLC*SRKASVRRI*TKGEVERDIIGQSDQGQMADLSYNNNSVPAYLNDLFGDCFFTPDGDTVFLSEENDKNNIVASSETTPATIASRVLEDGTSVPANFAGGIAATNLDKPGMQATVMGPAATTPQPTVPAPFIQPPQKENHIGFATLPTTTRTKSRRTRKMSEQQQNERRERNREHAKRSRIRKKFLLESLQQSVQLLKEENDKLKDSIKIHLGEETAGKLLAPEHLQSMSSSLASSGGAIVTPTALAPGKQGIIANTSSDANKVLDDPDFNFIKALQTAQQNFVVTDPSLPDNPIVYATQGFLNLTGYTLDQVLGRNCRFLQGPETDPKAVDKIRKAIEAGVDMSVCLLNYRADGSTFWNQFFIAALRDAAGNVTNYVGVQCKVSDEYAATVCKKQ…	Centric
MATOU-v2.96668239_3	96668239	RTKLVKERNREHAKRSRIRKKFLLESLQQSVSLLKEENEKLKGAIRSHLGDKEADALLSKQALADAAGTGGGLIASSSADANKVLDDPDFSFIKALQTAQQNFVVTDPSLPDNPIVYATQGFLNLTGYTLDQVLGRNCRFLQGPETDPKAVEKIRNAIEEGSDMSVCLLNYRVDGTTFWNQFFIAALRDAGGNITNYVGVQCKVSDQYAASVCKKQEEVDTAAVAGGAGFKQES***P*VSLSREPSCDGRTAMGVCPLMYMCQNSSHTIHMFHFNRDSVEWWSIHHCIWDLIVQ*KKDNACTTHTPCFHKLTII*A	Centric	Bacillariophyta	Coscinodiscophyceae
MATOU-v2.96684772_1	96684772	PTSQVIQPLQQVIPQTQYQYPQSLIPAHQPSSFSSATSTAKLTEQQKLERRERNREHAKRSRLRKKFLLESLQEQIHGLQSDIEKLTGVIRQEMPEKAEALLRDMQLSTDVTKTKSVGPNGTQYKPVNMPSGFGPVKTLIEPDFRLMFSLSNSQQNFAISDPSLPDNPIIYVSQGFLDLTGYTLDQVLGRNCRFLQGPGTDQAAVEVIRKGMKEGVDTSVCLLNYKADGTPFWNQFFVAALRDANNNIVNYVGVQCEVSKAVVESHLEHLNNDDKGGVAG	Centric
MATOU-v2.96708593_2	96708593	KVLDDPDFSFIKALQTAQQNFVVTDPSLPDNPIVYATQGFLNLTGYTLDQVLGRNCRFLQGPETDPKAVEKIRNAIEEGSDMSVCLLNYRVDGTTFWNQFFIAALRDAGGNITNYVGVQCKVSDQYAASVCKKQEEADAVAATGSAGFKEED*WQGDSCKSEVTKYG*YYLTX	Centric	Bacillariophyta	Coscinodiscophyceae
MATOU-v2.96777711_5	96777711	NGTDATVCLLNYKADGTPFWNQLFVAALRDADNCIVNYVGVQTMIEPNAGASALEDKVNAAHPISIGVDDDDDKDNAD*AICGFMVHSFSAATDQLFPAVMX	Centric	Bacillariophyta	Coscinodiscophyceae	Thalassiosirales
MATOU-v2.96825980_4	96825980	YKADGTPFWNQFFVAALRDAENNVVNFVGVQCEVSKAVVDKQMAEKGYGIKDGKS*NYKRRLSKGTASFP	Centric	Bacillariophyta	Mediophyceae	Hemiaulales
MATOU-v2.96830341_1	96830341	GRCKRRIPHCECWSRSTSLRRR*RSLTSVARRAFCLERVKRKSNKRRKRIPRIRKRATQAISSRCFDLTFRSSSLSHPDSKTSLCPTRASQTTPSLQGAGTDKKAVDVIRTAVANGTDATVCLLNYKADGTPFWNQLFVAALRDAEDCIVNYVGVQTLIEPNAGASALEDKVNAAHPISVGVADDTDDKDSKK*Y*GTCWLFHFGSYKPQI*RDVLSLKQLLTWIKNRMKSSL*CSRLTKSLG	Centric	Bacillariophyta	Coscinodiscophyceae	Thalassiosirales
MATOU-v2.96830341_3	96830341	KMQEENSTLRMLVQKHIPTKALKIIDECCAKSVLFGTSEEEEQQEKKEDPQDKKEGNASNKQPLLRSDFSLIESLTSGQQNFTLSDPRLPDNPIVAGGRDRQEGSRCDKDGGGKWNRRYRMFAKL*SRWDSVLESIVCGGVERCGGLYCELCWGANFDRTQCWCVCAGRQSQCCSSNFCRCGRRHR**RFKKVILRYLLALSFRFIQAPDLKRCIVFKATFNLD*EQDEIIFVMLKTNKITGX	Centric	Bacillariophyta	Coscinodiscophyceae	Thalassiosirales
MATOU-v2.96893469_3	96893469	GEDVNVTFVNYTSDGKPFWNSLFIAALRDADNNIVNFIGVIVKVTGPEAGDSEYGKVLK*DPR	Centric	Bacillariophyta	Coscinodiscophyceae	Thalassiosirales
MATOU-v2.97327205_1	97327205	GGRDSGGGGGPGGPGCGDGSCSCCRQWDKPCWRQCDAVICS*SQCWYRSRPT*T*RIIPRLLLW*FWRAGSCHELERPLSSSGSSGAHRGAQSRSQAHRRTSGPGADNHCNSVGASGAPSSLVPVPSSVHSSGASGAPSGSLLPAASLTESQRKERRDRNREHAKRSRLRKKFLLESLQEQIEGLQSEIHSLKDIIKRELPGKAPDLLRGFGDAEGDKDDPSQPKKGAYTPLPMPSGFGPVKTLMEPDYRLMSALSGSQQNFAIADPSLPDNPIVYVSQGFLDLTGYTLDQVLGRNCRFLQGPGTDQAAVDIIRKGVQEGVDTSVCLLNYKADGTPFWNHYKADGTPFWNQFFVAALRDAENNVVNFVGVQCEVSKAVVEKHITEGKTPASSIPGS*IW…	Centric	Bacillariophyta	Coscinodiscophyceae	Thalassiosirales
MATOU-v2.97327205_1	97327205	GGRDSGGGGGPGGPGCGDGSCSCCRQWDKPCWRQCDAVICS*SQCWYRSRPT*T*RIIPRLLLW*FWRAGSCHELERPLSSSGSSGAHRGAQSRSQAHRRTSGPGADNHCNSVGASGAPSSLVPVPSSVHSSGASGAPSGSLLPAASLTESQRKERRDRNREHAKRSRLRKKFLLESLQEQIEGLQSEIHSLKDIIKRELPGKAPDLLRGFGDAEGDKDDPSQPKKGAYTPLPMPSGFGPVKTLMEPDYRLMSALSGSQQNFAIADPSLPDNPIVYVSQGFLDLTGYTLDQVLGRNCRFLQGPGTDQAAVDIIRKGVQEGVDTSVCLLNYKADGTPFWNHYKADGTPFWNQFFVAALRDAENNVVNFVGVQCEVSKAVVEKHITEGKTPASSIPGS*IW…	Centric	Bacillariophyta	Coscinodiscophyceae	Thalassiosirales
MATOU-v2.97761341_1	97761341	IRKAIEEGSDMSVCLLNYRVDGTTFWNQFFIAALRDAGGSITNYVGVQCKVSDQYAANVCKKQEEADKASANACGEGGEEREDDDGDE*K*RLFLSEFIWSILSSFRNMANLL*WKIRLHLYIFLSPLLLFHFPTYTQTDRSTQITQHAKI*TLDYTSKQAHMSFFRTL*S*CVEKKESEEGVSDLTWK	Centric	Bacillariophyta	Coscinodiscophyceae	Corethrales
MATOU-v2.97815350_1	97815350	TWDTTSDANKVLDDPDFNFIKALQTAQQNFVVTDPSLPDNPIVYATQGFLNLTGYTLDQVLGRNCRFLQGPETDPKAVDKIRKAIEAGIDMSVCLLNYRADGTTFWNQFFIAALRDAAGNVTNYVGVQCKVSDQYAATVCKRQSEIDDDDNDADQDVDDDL*YITIYECIYIQALFSLF*P*QMIKRTIPFTKLNDTTLNIFLLFFLYYIFTHYKNFAFFILFYILNKNALL*KLITIYKFYFLFYX	Centric
MATOU-v2.97904098_4	97904098	AAPAPQVSAGNAAAAETVDRKRTASEAELDENNSGTKKLTAKQKLERRERNREHAKRSRLRKKFLLESLQEQIHALQEQMDKMKSAMKREL	Pennate
MATOU-v2.97912235_6	97912235	VLGRNCRFLQGSGTDPKTVDIVRKAIQSGSDCTVCILNYKADGTPFWNQFFVAALRDSDNCIVNYVGVQTEIEPDAGANALEDRVNAVMPLANKDDDDEEGKHKS**KLNKKSRNKLX	Pennate	Bacillariophyta	Bacillariophyceae	Bacillariales
MATOU-v2.97914614_6	97914614	KAVAIGEDVNVTIVNYTSEGNPFWNSLFIAALRDADNNIVNFIGVIVKVLAPEPGDSEYGKVLE*VCDVSQEEHHKAKTA*ASNKFVCTLVGERKEKFYCF*EDATE*KSIYYRQX	Centric	Bacillariophyta	Coscinodiscophyceae
MATOU-v2.98037379_2	98037379	SLASSGASAGTPAAGGAVPSQAKLASVVGKNGGSSIIANATSDANKLLDGPDFDFIMALQSAQQNFVVTDPSLPDNPIVYATQGFLNLTGYTLDQVLGRNCRFLQGPETDPKAVEKIRKAIEAGIDMSVCLLNYRADGTTFWNQFFIAALVGSTGSVTNYVGVQCKVSDRYAATVCKRQGEIDDDSADQVADDDN*ISHPCICLYLLLNKNFKPFNIAHT*LEIAFFDL	Centric
MATOU-v2.99359189_3	99359189	GRRRRGTVPSRTAAGSQPQASTGATGRGPPSWEPPRAGAAWAAASRSLLPTPSATSHPRRRSSSPGCSSPPPPPPQQLPRMQFATPAMLGAPDSGTARPGGGALPGGGAARPRNAGRAGTGTGKKVERRERNREHAKRSRIRKKFLLESLQQSVTMLKEENETLRNSLREELGDEADELVKKENLAAAAAAPGLIGTSSDSSKVLDDPDFSFIKALQTAQQNFVVTDPSLPDNPIVYATQGFLTLTGYTLDQVLGRNCRFLQGPETDPKAVEKIRRAIEEGSDMSVCLLNYRVDGSTFWNQFFIAALRDAAGX	Centric	Bacillariophyta
MATOU-v2.99497947_3	99497947	QTSVPAPAIAAVPRNPSPAMRQPQTAALKAPTAPRPPSKSAVAPTISTQASKRPRTTAAPQSTMAKASAYSFAGSNTMSMATAAMAAQINKAHPMPPAPPPDARGIEKTQAQVDRRRERNRILARRTRLRKKFFFESLQKDVADLQRENAALKSIVRSCLKPDDAKVILDSCDAQHKMPSAVQSQTAQPHHFMNENQTNVTCRDDSSVRKLDREDFSLIQSIQNSQQCFIITDPSLHDNPIVYASDDFLKLTGYSQEEVLGR*AGAEQHSLLL***HX	Centric	Bacillariophyta	Coscinodiscophyceae
MATOU-v2.99506485_5	99506485	QPASVPFMQPPQKDNHIGFATLPTAVGRGGAPGTGKSRRTRKMSEQQQNERRERNREHAKRSRIRKKFLLESLQQSVQLLKEENEKLKDSIKTHLGEDTASKLLAPEHLQSMSSSLASSSSAAASGAGVVTSQVNLAAAAGKEGGIIANTTSDANKVLDDPDFNFIKALQTAQQNFVVTDPSLPDNPIVYATQGFLNLTGYTLDQVLGRNCRFLQGPETDPKAVDKIRKAIEAGIDMSVCLLNYRADGTTFWNQFFIAALRDAAGNVTNYVGVQCKVSDQYAATVCKRQSEIDDDDNDADQDVDDDL*YSTIYECIYIQALFX	Centric	Bacillariophyta
MATOU-v2.99510147_6	99510147	GRGTGSTRSGRASGRSSSWSRSRSRSTVCRGRSRR*SPS*SGRSPAGRPGC*RAWGATGRRRGTGRTAPPPGLRRGRTPPSPCRRGSAP*RRSWSLTTA*CPRCPGPSRTSPYLTPACRTTPSGSGFGPVKTLMEPDYRLMSALSGSQQNFAISDPSLPDNPIVYVSQGFLDLTGYALDQVLGRNCRFLQGPGTDQAAVDVIRRGVSEGTDTSVCLLNYKADGTPFWNQFFVAALRDAENNVVNFVGVQCEVSKAV	Centric	Bacillariophyta	Coscinodiscophyceae
MATOU-v2.99559107_2	99559107	GKRAASRAGLATVTATSRAGRRRKAAVKFAAATKPPSSLIRRRTRNRAHVKRSRLRKKFLLESLEEQVRGLQGDLFALKSIIRRELPHSAVSLLKDTGDGPDERSAGGPARSVYAPCLPMQSVTITDPSLPDNPIVYASQGFLNLTGYTLDEVMGRNFRFLQGPDTDQVTVDVMRKGFKEGTDMSVCLLNYKKDGTPFWNQFFVSSLKDREDNVVNFLGVHCEVSKFVVE*NKSKGKPX	Centric	Bacillariophyta	Coscinodiscophyceae
MATOU-v2.99726174_3	99726174	PIVYVSQGFLDLTGYTLEQVLGRNCRFLQGPGTDQAAVEVIRRGITEGTDTSVCLLNYKADGTPFWNQFFVAGLRDAEDNVVNYVGVQCEVSKATVEKHMTEGKTPPSPLSX	Centric	Bacillariophyta	Coscinodiscophyceae
MATOU-v2.99806171_5	99806171	QTQTTLSGYKRPSSDIVNVGHPHQQQPPLHQPLTKTNQRHKSQAQLDKRRERNRILARQTRLRKKYFFESLQKEVMDLQYENLAX	Centric
MATOU-v2.100387950_4	100387950	HGGARKTKPRQKEVYA*ISTRTSGLIAT*KSEASHVGSG*YPGTCTDDNIRVLHFQSPFWRHIFYGGSRCWRRRDSTSSTGGQGAGDDETGDGKNKTTALVRSDFQLIDSLSAGQQNFVLSDPRLPDNPIVFATPGFYRLTGYTPEQVLGRNCRFLQGSGTDPKSVDIIRKAIQSGSDCTVCILNYKADGTPFWNQFFVAALRDSDNCIVNYVGVQTEIEPDAGANALEDV*TP*CLSPTRTTTMMMESKRSFEDVTHVCVYSVLRISFTKALSNYSVQGLLSE*LDVFLLSIIRIINAINKG*KLIENFLFSSPRCRYVGTAI*NIALALDIEY*KF*LFQ	Pennate	Bacillariophyta	Bacillariophyceae	Bacillariales
MATOU-v2.101025115_4	101025115	NFKTSKFYLL**FARHSGYLRSQTNRKTELFRFLLSLSR*NTIYMSAPIMSQPVTIPVFGSTSTQQQQPTQQQGSGEWYMDDGGQDMDFDLLAEYLLEEPGSSQTGGFDFNADFVVSPEQSVDGAGESGVAQARDIITQHAATIASTPAPAAQPKTQVVQYVPVAAPPPLVMSPPPQIAAQGMAVPQTIPQYIPQQTTMAPAPSTATTQRAPVRSAQKKTGETKRRRPNPPEVAAQGLINTSYMTNGTANMSPAVVAAAAAAAAMQGRGRKKTQAQIDRRRERNRILARRTRLRKKFFFESLQKEVTELQKENAALRDIVRTEIEGDEGRQLLEQCNAARKLPREVLEACGENPDLDQEDFNLVTSIQQSQHSFLITDPSLQDNPIVFASDDFLTLTGY…	Pennate	Bacillariophyta	Bacillariophyceae	Bacillariales
MATOU-v2.101128998_3	101128998	VSLLKDTGDGPDERSAGGPGRSVYAPCLPMQSVTITDPSLPDNPIVYASQGFLNLTGYTLDEVMGRNFRFLQGPDTDQVTVDVMRRGFKEGTDMSVCLLNYKKDGTPFWNQFFVSSLKDREDNVVNFLGVHCEVSKFVVE*NKSKGKPRSRRCSLSCLVGIFLIIARGAQPCRQLCQELKHEY*PQLWAHTTRLFGRTHWIMVDDK*QSHNGS*VG*VSVLEHRTTASISGVIM*WKVVMCSI*ERSEPLNRSSS*RRRMFX	Centric	Bacillariophyta	Coscinodiscophyceae
MATOU-v2.101151944_1	101151944	SSCCFVLLVVLGESRIGRETKATTRSFSLSQRCMKLHTSQYFRKR*TPLHAFQNSKPMSGFDLASAGEPEPVSTASAAAQDPGNSNAGAMQFFAPDPNAPGDSTQLDLDELFRDCYFGDFPMPDEATSAELTPATHPSEPATTPKRTADQAGLAEKATTRPKAGRTSAKKATAAPKSSGEKSDSEKGLSARPTASLSESQRVVRRTRNREHAKRSRLRKKFLLESLQEQVEGLQGELSTLKSIIRRELPDKAAKLLKDAGSGPDGDDCPGLPMPSGFGPVKTLMKPDYRLMSALSGSQQNFAISDPSLPDNPIVFVSQGFLDLTGYTLDQVLGRNCRFLQGPGTDQAAVDTIRQGVKEGIDTSVCLLNYKADGTPFWNQFFVAPLRDAEDRVVNFVGVQ…	Centric	Bacillariophyta	Coscinodiscophyceae
MATOU-v2.101154068_5	101154068	GIKKGAYTPLPMPSGFGPVKTLMEPDYRLMSALSGSQQNFAISDPSLPDNPIVYVSQGFLDLTGYALDQVLGRNCRFLQGPGTDQAAVDVIRRGVSEGTDTSVCLLNYKADGTPFWNQFFVAALRDAENNVVNFVGVQCEVSKAVVEKHITEGKTPRSSLAKEAGGS*DREGGGTSPPEGRAGGGKERSRRYISPARAALPGAAPMEERSPSRLYRANYLSDPWRVKVSSFQLLTTGFX	Centric	Bacillariophyta	Coscinodiscophyceae
MATOU-v2.101181991_3	101181991	RCPSDNADAESACPTSKYSRSPR*RGYVQGAFPGPGHDGNNTATGSSTVCPSHCSTSTASDHSPSNFCSGPCHRYSP*EPVEPVACHAATSNSRIKGSYCSQASVKVCGCSHHFHSSQQTPEDDCSPSVYDGQGLRLLLRREQHHVHGNGRDGCTD*QGPSDAPRAALRCTGY*EVEKTQAQVDRRRERNRILARRTRLRKKFFFESLQKDVADLQRENAALKSIVRSCLKPDDAKVILDSCDAQHKMPSAX	Centric	Bacillariophyta	Coscinodiscophyceae
MATOU-v2.101378446_1	101378446	VDNKSMDRSQIVKERNREHAKRSRIRKKFLLESLQQSVSLLKEENDKLKNAIRTHLGEKEAEALLSKQALADAATAGASGLIAKNTGDANKVLDDPDFSFIKALQTAQQNFVVTDPSLPDNPIVYATQGFLNLTGYTLDQVLGRNCRFLQGPETDPKAVEKIRIAIEDGSDMSVCLLNYRVDGTTFWNQFFIASFRDAGKLCWRSVQGIGSICCKCL*EAGGG*CHGRKGTGCLWSEIRLIRWRDIYHGKAGNEEDAGSSRKLINTDPHGTESF*LGRGLMPFLSF*TDLX	Centric	Bacillariophyta	Coscinodiscophyceae
MATOU-v2.101563907_2	101563907	GQSGKDGILATGKEEANKVLDDPDFNFIKALQTAQQNFVVTDPSLPDNPIVYATQGFLSLTGYTLDQVLGRNCRFLQGPETDPKAVDKIRKAIEDGVDMSVCLLNYRADGTTFWNQFFIAALRDTSGNITNYVGVQIKVSDQYAATLLKRQHETDAAEEEEDN*LFKTX	Centric
MATOU-v2.101918716_4	101918716	ISKSRKRPVEEDNDGERTRQLERRVRNREHAKRSRLRKKFLLESLQDQIYGLQDQVNKLKKVIREELPDQSKSDQLIAEICGRETDNKGNELCCKPVPMPSGFGVGRQHAVKTVMEPDYRLVSALSGSQQNFVISDPSLPDNPIVHVSDGFLALTGYRLDQVLGRNCRFLQGPGTDQKAVDVIREGVEKGIDSSVCMLNYKADGTPFWNQVFVAALRDAENNVVNYIGVQCEVGKAVVEKQQKDRSADLAAHRQKNNRIANDEGRAKKA*RKVMIMQASNERKKKKKRHDAPKRWWHIVLRAKSMMRYVRK*ERQ*QQQQDSSRGNDAQA*SNHLFFEDSEDKNEQKTPKK*NCEKRRGGNENGKETIAQKILLICSHETKHQSKIHASGKQRCRSTRM…	Centric
MATOU-v2.101943124_1	101943124	KKVIREELADQKANKLIAEICGRESDSNGNELCCKPVPMPSGFGVGRQHAVKTVMEPDYRLVSALSGSQQNFVISDPSLPDNPIVHVSDGFLALTGYRLDQVLGRNCRFLQGPGTDQKAVDVIREGVEKGIDSSVCMLNYKADGTPFWNQVFVAALRDAGNNVVNYIGVQCEVGKAVVEKHQKDRSADLAAHRQKNNRIANDEGRAKKA*WKVMIMRVTKGKRRRDRMRPNNGGILYRGQNQ**DMYVRK*ER**QQQQDSSRGNDAQA*SNHLVFEDSIEKN*RNPPPPTNRNYDK	Centric
MATOU-v2.107375513_3	107375513	LQDNPIVFASDDFVTLTGYSREDILGRNCRFLQGAQTSKDKLDIIRKGLSTGDDVSVTLINYTADGQPFWNKLFIAALRDAQNNIVNFIGVIVKVASPEPGDPEFGKTIIGIGGGEEQQQQQEEKNVASVATAASVVETPPAASVTVVESK*KK*MMERGRERDRKRNVKIYTYY	Pennate	Bacillariophyta	Bacillariophyceae	Bacillariales
MATOU-v2.107376240_4	107376240	QQNFVVTDPSLPDNPIVYASQGFLNLTGYSLDQILGRNCRFLQGPETDPKTVERIRNAIEQGEDLSVCLLNYRVDGSTFWNQFFIAALRDAAGNITNFVGVQCKVSDTYAASVIKEQQKEEEEQVQAQNEAAAEMQQQAEQQQQPLSQMQHDTTHAIQ*EKLPAFS*TKPRRFIRTKHYFTCNH*QANHNDPFSIHKLCED*SIYSFTNGANKFIRQSDITQHHAYIALSNSGDNDYYNLEDTFSITCYKL*YK	Pennate	Bacillariophyta
MATOU-v2.107427705_2	107427705	LRTLIQDNIPEHAQNIISECCSKNTLFGDKETAEAEEKKATALVRSDFQLMESLTSGQQNFVLSDPRLPDNPIVFATPGFFKLTGYSQEQVLGRNCRFLQGPGTNPKTVDIIRKAIATG	Pennate	Bacillariophyta	Bacillariophyceae	Bacillariales
MATOU-v2.107458009_5	107458009	AISDPTLPDNPIVYVSQGFLDLTGYQLDQVLGRNCRFLQGPGTDQSAVDVIRKGISEGIDTSVCLLNYKADGTPFWNQFFVAALRDAENNVVNYVGVQCEVSKAVVEKHMGVDKKK*FDAHNLPISQNVCNQMSNEPILKTIESR**FEDTYTSLRYIYIVFKVI*FRQFNYTGI*SI*SGM*RKGGWI*GWWVRFISIWNNEEVLLWGPVTRQQIGLX	Pennate	Bacillariophyta
MATOU-v2.107468040_5	107468040	VTDPSLPDNPIVYASQGFLNLTGYSLDQILGRNCRFLQGPETDPKAVERIRSAIEQGNDLSVCLLNYRVDGTTFWNQFFIAALRDASGNITNFVGVQCKVSDQYAASVTKNQEEEDDAAAAAGG*YIFASVSKNDVWGEGRGVA*FLLDW*L*RCPLIL*RIDCRIECVTVIAALQRHTLLSHNVEX	Pennate	Bacillariophyta
MATOU-v2.107486166_1	107486166	DGTPFWNQFFVAALRDSDNCIVNYVGVQTEIEPDAGANALEDRVNAVMPLANKDDDDEEGKNES**KINKEFRTKQ*VQSIII*RYLY	Pennate	Bacillariophyta	Bacillariophyceae	Bacillariales
MATOU-v2.107488867_2	107488867	FLDLTGYQLDQVLGRNCRFLQGPGTDQSAVDVIRKGISEGIDTSVCLLNYKADGTPFWNQFFVAALRDAENNVVNYVGVQCEVSKAVVEKHMGEQKKK**GTNQSSIYQIHIRTHIKSA*FRKTL*L*MDRFQVEMK*EES*S*I*ISVRAQWVKYMKI*KRDKVLLWGPVTRHHIGWEFVVSILMLCIFFVRPLIDSFWC*FKF**ILNV*CSTMKLQYTALKNKILVKRRWRNLGRSLQAIEYNRPASFVVLDFSECHKPTQVCVRLYLGRGHREAFVCRFNSF*INX	Pennate	Bacillariophyta
MATOU-v2.107527419_1	107527419	DGTPFWNQFFVAALRDAANNVVNYVGVQCEVSKAVVEKHMAEKKK*AKTR*SLLLETWCCHCFCMVKNQDSFWNX	Pennate	Bacillariophyta
MATOU-v2.107533288_6	107533288	KIINECCSKNTLFGDKETSEAAEKKATALVRSDFQLMESLTSGQQNFVLSDPRLPDNPIVFATPGFYKLTGYSQEQVLGRNCRFLQGPGTNPKTVDIIRKAIATGSDCTVCILNYKADGSPFWNQFFVAALRDSDNCIVNYVGVQTEIEPDAGANALEDRVNAVLPLQT	Pennate
MATOU-v2.107536306_3	107536306	NENGTQILEQCSAAEKLPDAVLEACGEHSSDIGQQDFNLVQSIQQSQHSFVITDPSLQDNPIVFASDDFLHLTGYSREEVLGRNCRFLQGVDTSASKVQKIRKGLSAGTDVSITILNYTSDGTPFWNELFIAALX	Pennate	Bacillariophyta	Bacillariophyceae	Bacillariales
MATOU-v2.107538227_3	107538227	TPFWNQFFVAALRDSDNCIVNYVGVQCAVDSNVGASALEDKVNSVLPLQNRGESPTQDDS**PAKRLLIIIHEIIIRLR	Centric	Bacillariophyta	Coscinodiscophyceae	Chaetocerotales
MATOU-v2.107545127_2	107545127	GPGTNPKTVDIIRKAIATGSDCTVCILNYKADGAPFWNQFFVAALRDSDNCIVNYVGVQTEIEPDAGANALEDRVNAVLPLQTKDDEYGDNFEIATKDY**FIIQVVVFSEFRINSIDLVKYY**	Pennate	Bacillariophyta
MATOU-v2.107547949_6	107547949	MGGDDLSVCLLNYRVDGTTFWNQFFIAALRDAAGNITNFVGVQCKVSDTYAASVIKEQQREEEEQAQAHNEEEQQVEQQPQQPPQHGDIQSX	Pennate	Bacillariophyta
MATOU-v2.107560621_5	107560621	RFLQGPGTDQSAVDVIRKGISEGIDTSVCLLNYKADGTPFWNQFFVAALRDAENNVVNYVGVQCEVSKAVVEKHMGEQKKK*QDTS*SSSIKYTCARHDILKFX	Pennate	Bacillariophyta
MATOU-v2.107574737_3	107574737	MGGTMVPGVTKTPAVPFKEAPQQRHHLQYAAMSKKKSSRSSERKMSEQQKNERRERNREHAKRSRIRKKFLLESLQQSVALLKEENDKLRESICQHVGEEQAEMLLEQKMDGSNGDMRLITSSQGAANKVLDDPDFSFIKALQTAQQNFVVTDPSLPDNPIVYAS	Pennate	Bacillariophyta	Bacillariophyceae	Bacillariales
MATOU-v2.107581536_1	107581536	RKKFLLESLQQSVALLKEENEKLRDSIREHLGNDKAEQLLNSSGGGESPDAALIASSQGAANKVLDDPDFSFIKALQTAQQNFVVTDPSLPDNPIVYASQGFLNLTGYSLDQILGRNCRFLQGPETDPKAVERIRSAIEQGNDLSVCLLNYRVDGTTFWNQFFIAALRDASGSITNFVGVQCKVSDQYAASVTKTQEEEDGSVATAGG*NISLLSPRMTFGEAYFLVGLVAAKMSSRPVKNRL*DRIRYCHRSTPKAHHIITLKTRKTMKIYRRRQPQY*SCVIAAHREFGSSVGQLFILFFTYX	Pennate	Bacillariophyta
MATOU-v2.107805946_1	107805946	TWVSVTFVNYTADGTAFWNKLFIAALRDAQNNIVNFIGVTVKVAGPEPDDPEAGKMLPGENVMHGSDDQQSSGCGDDNVDADAAVMAIEGAVTAAVAAAAPRPMQEVKAEREE*SLFRTHPVDQLNTTLRL*PIYTLPFLIX	Centric	Bacillariophyta	Coscinodiscophyceae	Chaetocerotales
MATOU-v2.108601020_5	108601020	YKADGTPFWNQFFVAALRDAENNVVNFVGVQCEVSKAVVEKHISEGKNAATCLPGA*RWGSVSFSMPR*TKYIERNLCCDVFCSSELCCKGKGNNAQL*CS*YCIPRSSLT*PPT*FWRELSL*TDVAPI*SLFCGIILFSFHQT*PF*KNPATDKGGLSFLTGIISMQMNPFHVECLFFS*FPDLYK**DCSKSX	Centric	Bacillariophyta	Coscinodiscophyceae	Thalassiosirales
MATOU-v2.108670730_6	108670730	MGPTVPYKEAPQQRHHIQYASMTKKKSSRSSERKMSEQQKNERRERNREHAKRSRIRKKFLLESLQQSVAMLKDENDKLRDSIRHHVGEEQAESLLAEKMDGSNGDMRLTTSSQGAASKVLDDPDFSFIKALQTAQQNFVVTDPSLPDNPIVYASQGFLNLTGYSLDQILGRNCRFLQGPETDPKTVERIRNAIEQGDDLSVCLLNYRVDGTTFWNQFFIAALRDAAGNITNFVGVQCKVSDTYAASVIKEQQKEEEERAQAQTDAHQQQVEQQQQPPLQMQQDTTPTMQ*ELHKQLVR*YHGRHTHVKHFLHVTTSKPTTTTIL*TFLNLCED*FIHSPTGLYIIYSSVRHHTTSH*HSTTT*RRRRRRLLLLLFGGDLFYHLLENKIQKPD*QX	Pennate	Bacillariophyta	Bacillariophyceae	Bacillariales
MATOU-v2.108683838_3	108683838	APLAHLGMTLPAPACSTLPASAPNLPRTGGSDMLVYHHAVPSSSANKRPYPDISANSSVSKGTLSRQMDCVHYLPGGKKQKNQAQIDRRRERNRILARRTRLRKKFFFESLQKEVTDLQRENTVLKEIVKAKLDAEIAVAVLADCHVRPN*MQRLRLLC*QTAMLAIFHQL*WRILKMTPLILISKILIWFVV*KSPNNVL*LQTQACKTTQLSVQVKTFC	Centric	Bacillariophyta	Coscinodiscophyceae
MATOU-v2.108702509_5	108702509	TLDQVLGRNCRFLQGPETDPKAVEKIRTAIEEGSDMSVCLLNYRVDGTTFWNQFFIAALRDSGGNITNYVGVQCKVSDQYAANVCKKQEEADMAAAASDADGVGLKQES*WHNEQHHLKGGCFQVFARKHVVAQ*T*YFVHETFAHLVFIMA*FTPLDPX	Centric	Bacillariophyta	Coscinodiscophyceae
MATOU-v2.108709936_2	108709936	DGLLANTGGMANKVLDDPDFSFIKALQTAQQNFVVTDPSLPDNPIVYASQGFLNLTGYSLDQILGRNCRFLQGPETDPKAVEHIRKAIEQGNDMSVCLLNYRVDGTTFWNQFFIAALRDASGAVTNFVGVQCKVSDQYAAQITKQQEEEDAAAAAEGGEAEEEA*K*KRQQNGFCEERNDAWQNGNTVGYHLEFMQSSKQAHILMEWTETDVDSKS*IVVGTELHEEKX	Pennate
MATOU-v2.108801579_3	108801579	QKGGAGDDGLAASTQGIANKVLDDPDFSFIKALQTAQQNFVVTDPSLPDNPIVYASQGFLNLTGYSLDQILGRNCRFLQGPETDPKAVEHIRKAIEQGNDMSVCLLNYRVDGTTFWNQFFIAALRDASGTVTNFVGVQCKVSDQYAATVTKQQEEEDA*GRAQGTAGTQTTNHEDLNHEDERKQRCMFREKGQMREDCPASLATICAGTIAFNHNKKS*II	Pennate	Bacillariophyta
MATOU-v2.108813069_1	108813069	NLTGYTLDQVLGRNCRFLQGPETDPKAVEKIRTAIEEGSDMSVCLLNYRVDGTTFWNQFFIAALRDAGGNITNYVGVQCKVSDQYAASVCKKQEEADIAAAASEDDGAGLKQES***A*CLILYGSGTHKGSCDSTTNMILRA*HTYTPCIHITCNRRIWYPCEDCNIYGLYLWPFGSSEAKSYVRHMHSCICNLLKNHFDS	Centric	Bacillariophyta	Coscinodiscophyceae
MATOU-v2.108855083_4	108855083	FESLQKEVVELQKENAALRDIARTEIEGDEGRELLEQCNASRKLPREVLEACGENPDLDQEDFNLVTSIQQSQHSFVITDPSLQDNPIVFASDDFLTLTGYSREDVLGRNCRFLQGPDTSKEKVDLIRKGVAIGEDVSVTLVNYTADGTPFWNKLFIAALCDAQNNIVNFIGVIAKVASPEPGDPDFGKPLSTEAESEERSESEADADGTVKAIEGAVTAAVAAAPSVLSG*HPFGDCEGDVVVFFYQGAPDPIQQELCIAVYKLPPFVLLLFAYCPHLSLIDEY*LLAVKQ	Pennate	Bacillariophyta	Bacillariophyceae	Bacillariales
MATOU-v2.108860323_1	108860323	SRVRKKFMLESLQEQVSSLQSENQRLRTLIQDNIPEHAQNIISECCSKNTLFGDKETAEAEEKKATALVRSDFQLMESLTSGQQNFVLSDPRLPDNPIVFATPGFFKLTGYSQX	Pennate	Bacillariophyta	Bacillariophyceae	Bacillariales
MATOU-v2.108948252_6	108948252	ISDPTLPDNPIVYVSQGFLELTGYTLDQVLGRNCRFLQGPGTDQSAVEVIRKGIKEGVDTSVCLLNYKADGTPFWNQFFVAALRDAENNVVNFVGVQCEVSKAVVEKHMGDGKKKA	Pennate
MATOU-v2.108966563_4	108966563	YVSQGFLDLTGYTLDQVLGRNCRFLQGPGTDQSAVDVIRKGVREGVDTSVCLLNYKADGTPFWNQFFVAALR	Centric
MATOU-v2.109042839_1	109042839	ALKLMEKKAENSWNSVTQQENYQEKFLRHAGKILI*TKKTLISSRVSSSRSIHSLSRIRVFKIIQLSSLLTIS*R*RVIQETMYLGVIAGFCKAPILVKKR*I*SEREDVSVTLMNYTADGTPFWNKLFIAALRDAQNNIVNFIGVIVKVSSPEPGDPDFGKPLGLENETKEQCGGDADGTVKAIEGAVVAAVAAAPTVLSG*RLFRLSFQKGILFISVESLKQLLILSATNNQYVLQSYFLKDPNKYMKQ*SNSX	Pennate	Bacillariophyta	Bacillariophyceae	Bacillariales
MATOU-v2.109042839_3	109042839	TEIDGEEGRELLEQCNAARKLPREVLEACGENPDLDQEDFNLVTSIQQSQHSFVITDPSLQDNPIVFASDDFLTLTGYSRDDVLGRNCRFLQGTHTSKEKVDLIRKGGRLCDSDELYR*WNALLEQALHCGAARRAK*HCKFYRCYRKGVIPRAWRSRFRKTTRTGERNQRTMWGRCRWNRKGDRRCRGRCGRCCSNRA*RLKIVQIIFSKGDFIHLS*IVETAAHFICDEQPIRTAKLLFKRPKQIHEAIK*FX	Pennate	Bacillariophyta	Bacillariophyceae	Bacillariales
MATOU-v2.109143828_6	109143828	YRVDGTTFWNQFFIAALRDAAGNITNFVGVQCKVSDTYAASVIKEQQREEEEQAQAHNEEEQQVEQQPQQPPQHGDIQSMQ*EKTYAFDSDRT	Pennate	Bacillariophyta
MATOU-v2.109187661_1	109187661	SGGGNEGLLASSQGIANKVLDDPDFSFIKALQTAQQNFVVTDPSLPDNPIVYASQGFLNLTGYSLDQILGRNCRFLQGPEX	Pennate	Bacillariophyta
MATOU-v2.109225357_6	109225357	TWGTTFWNQFFIAALRDAEGNITNYVGVQCKVSDQYASTICSKQDFADAGEENAIVSATGQDDNKNLDX	Centric	Bacillariophyta
MATOU-v2.109254370_3	109254370	EQAEKLLEQKMDGTNGDMRLTTSSQGSANKVLDDPDFSFIKALQTAQQNFVVTDPSLPDNPIVYASQGX	Pennate	Bacillariophyta	Bacillariophyceae	Bacillariales
MATOU-v2.109552162_5	109552162	RFLQGPGTDQNAVDIIRKGIREGMDTSVCLLNYKADGTPFWNQFFVAALRDAENNVVNFVGVQCEVSKARVESELKSRAGTSA*INLLGKGGNSMIFDIQSVSLAFLFMV*WERMNTTEQKNVPSAFCFG*CRD*SAQFRLVSSQGYAII*X	Centric	Bacillariophyta
MATOU-v2.109666159_1	109666159	LGRNCRFLQGPGTDQSAVDIIRKGLREGVDTSVCLLNYKADGTPFWNQFFVAALRDAENNVVNFVGVQCEVSKAVVEKQIAEQKARDDTGTTPPT*NTTCILLHFMSL*EVLRVR*LSSWVRNNIAQEVQTILISITLGERWMYLR*IYPYIYN*CYYR*ISSTRLMYSIRKWKIMLQ*DAS*FRCN*IV*KVC*IR*CNKHCIRFKISATINX	Centric	Bacillariophyta	Coscinodiscophyceae	Chaetocerotales
MATOU-v2.109854147_3	109854147	KAFKEGTDTSACLLNYREDGTPFWNQFFVSALKDDEGKAVNYLGVHCKVSKVVVEM*PY*PQLYCRHGVGE*YRVKDDVVVHHEPVSSSEHLGWEAHED*KKCVPHGLVSIHFRQCYRRERLYHLLYLSCV*GSHDCLRCSAGLRFLGTDKPNKDHDVX	Centric
MATOU-v2.109984017_4	109984017	YYKSAIQY**CIAAAASTRANNHSVRASF*SFIVDCSSCCSESNCRQRGGCPYNNYSIYLAASNGPVSICSSYDNNQTEGFIDNKGGSKEDGWCYYMGGGAIVATTEAKRRRTNPPEVAAQGLINTSYLTNPVNMSPAVVAAAAAAVAMQGRGRKKTQAQIDRRRERNRILARRTRLRKKFFFESLQKEVIELQRENAALKDIVRTEVDSEEARQLLDQSNAARQLPQEVLEACGENPDLDQQDFNLITSIQQSQHSFVITDPSLQDNPIVFASDDFLTLTGYSREDVLGRNFRFLHGERTSKEKLDHIRKGLATGDDVSVTLVNYTADGTPFWNKLFIAALRDAQNNIVNFIAVIVKVASPEPGDPDFGTIIGDEDEDEQQQIAEEEEEKEEEGTSSA…	Pennate	Bacillariophyta	Bacillariophyceae	Bacillariales
MATOU-v2.110101093_4	110101093	PMPSGFGPVKTLMEPDFRLMSALSGSQQNFAISDPTLPDNPIVYVSQGFLDLTGYQLDQVLGRNCRFLQGPGTDQSAVDVIRKGISEGIDTSVCLLNYKADGTPFWNQFFVAALRDAENNVVNYVGVQCEVSKAVVEKHMKTDK*NK*RTP*LHNWNAFENDGVRGWYYRKIQKIVE*IGCIGSKQKIISC*AYYTSLEEVNK*YECREEGMSMDGNTKGVIFHFFYVLV*HDGLGTILSVTVSFFFVYIYIYIYISLDRVSGFPSTRGIWFGGCEITVF*IINVYACYVLDRSCVSVLFYAGGSHRLYVITIFILGGFI*WSIPIPRSCYTA*IFLSLFYEIGWLTLIHV*VHKTFVKINIDRLFFLSPRRAIKYYVQSFCSEGLFQQLKKQNQNTT*…	Pennate	Bacillariophyta
MATOU-v2.110168767_5	110168767	MGKN*RAQ*EAI*AKKPMAF*AKRP*PMQPVQEEDLLPAILLMPTKSWMIQIFPSSRHCRQLSKTLLSLILVFLTTQLCMQHKGFLILQDTP*TKFWVEIVASFKALRQTLRRWKRSALPSKRDLT*VYAY*ITV*TELQSVCLLNYRVDGTTFWNQFFIAALRDAGGNITNYVGVQCKVSDQYAASVCKKQEEADTAAALVVDGADLKQDS**SMAAD*KQQYQRRDGSIHVLENPHTLSLFHLILHCSGKKWLVWNARNRARFNCNITLPHCX	Centric	Bacillariophyta	Coscinodiscophyceae
MATOU-v2.110168767_6	110168767	HGEKLKSAIRSHLGEEADGLLSEKALADAAGAGGGLIASNSADANKVLDDPDFSFIKALQTAQQNFVVTDPSLPDNPIVYATQGFLNLTGYTLDQVLGRNCRFLQGPETDPKAVEKIRTAIEEGSDMSVCLLNYRVDGTTECMLTELPCRWNYILESVLHCSPQGCRWKYYQLCWCSV*GFRSICGQCLQETRRG*HCGCIGRGWCRFETRQLMKHGGRLKATVPEKGWEHSCLGKPTYPFLVSFNFALFRQEMAGVEC*KSSQI*L*HYPATLS	Centric	Bacillariophyta	Coscinodiscophyceae
MATOU-v2.110177138_2	110177138	NPDLDTEDFNLITSIQQSQHSFVITDPSLQDNPIVFASEDFLTLTGYLKEDVLGRNCRFLQGEQTSKGKLDQIRKGLAIGDDVSVTLVNYTVDGIPFWNKLFIAALRDAQNNVVNFIGVIVKVASPEPGDPEYGKSIGEEEEEEEEKEETSVDQREDADEVAKAIEGALEDSPVATVAVVSG*CNSFI*NKVETEKRGISESIFRLN**LKKSFSLYGAHTN*YRHYVLPHCS*NYSRKVREAGKRFNILFYLQX	Pennate	Bacillariophyta	Bacillariophyceae	Bacillariales
MATOU-v2.110250461_2	110250461	SSCGGTSAT**GTRQT*PSP*KVHVRIIARTSRCVAT*KSKATYYSTGQHP*TCTGDNIRVLYI*STLRRRR*PSRSDFQLIDSLSAGQQNFVLSDPRLPDNPIVFATPGFYKLTGYTAEQVLGRNCRFLQGSGTDPKTVDIVRKAIQSGSDCTVCILNYKADGTPFWNQFFVAALRDSDNCIVNYVGVQTEIEPDAGANALEDRVNAVMPLANKEDEEEEAMGNQNS*IKSNLPHIRISIIYIFDCRRATRKNQWX	Pennate	Bacillariophyta	Bacillariophyceae	Bacillariales
MATOU-v2.110250461_3	110250461	QAVAERRQRNREHAKRSRVRKKFMLESLQEQVAALQRENQRLRIIVQDSIPEHAQVIISECCTSSPLFGDGDNPVDLISN*LIA*VPDNKTLYCPIHVYLIIRSFLPHLDFTS*LVTQQNKYLDGTVGSYRVLELILRLLI*SERQSNLDRIVLFVFLIIRPTELHFGINSLLQPCVILTIVL*TTWGYKLRLNQMLVLMLWKTVLTLLCHLPTKKTKKRRQWETKTAK*NQTYHIYEYL*YIYLTVEERPGKTNGX	Pennate	Bacillariophyta	Bacillariophyceae	Bacillariales
MATOU-v2.110253525_6	110253525	RLPDNPVVFASPGFYNLTGYTAKEVLGRNCRFLQGPGTDTKTVEIIRKAVAIGADCTVCILNYKADGTPFWNQFFVAALRDSDNNIVNYVGVQCX	Pennate	Bacillariophyta
MATOU-v2.110289984_3	110289984	QGIANKVLDDPDFSFIKALQTAQQNFVVTDPSLPDNPIVYASQGFLNLTGYSLDQILGRNCRFLQGPETDPKAVDRIRKAIIGGNDMSVCLLNYRVDGTTFWNQFFIAALRDAAGNVTNFVGVQCKVSDHYAATVTKQQQEEEEEDMGAGDQ*ARLNLEYSLFLPS*CISFVYFEG*Y*INRVTLLSISKVK*G	Pennate	Bacillariophyta
MATOU-v2.110329724_4	110329724	YQLTGYTREQVLGRNCRFLQGPGTDPKAVDVIRTAVANGTDATTCLLNYKADGTPFWNQFFVAALRDSDNCIVNYVGVQCAVEPQDGASALEDKVNSILPLAHKQCEP*KY	Centric	Bacillariophyta	Coscinodiscophyceae	Chaetocerotales
MATOU-v2.110353771_1	110353771	CIIVYTDCLACLKCRRHPVPSRILTIGIVTFLNKSHILHLH*YGDYECY*V*YCSLASFASDLFIDFAKRGILVFTNPIFARVAFSV*SSSCQTNNKHQ*LFKMGASKSLCLLLCHKTLSLGKILILAIYFQITSIIWKIL**LQLPLIIHQSLENLKIKIRRP*PQE*TL*LDPHQSNSRALVIHLMSHCPQEEVLKLPFMLDIPLTCLVKSERFIRHLHNLKISRQPRSKSIWFCHIRLNNNNRLLKICKSKCLKIKTPN*SQPHSQLLKLRPQVLKHYPKSVIQILKTNLLIREKMVPRFRKTKYPMLLVAFPFLLAWAFVWAL*YHLVRQIEMVSQ*IILIGA*TLLPPHHLLDLQV*LGNLG*WQG*VVILLLVDQVGYPSQR*LKEDNEIVSM…	Centric	Bacillariophyta	Coscinodiscophyceae
MATOU-v2.110353771_3	110353771	HYRVHRLSGLFEVSAPPCSISYSNYWYRHIFEQITHSSFTLIRRLRVLLGIILFTCIIRI*SVH*FRKTRHFGFYKSNFCESGVFCLIFVMSDQQQASVAIQNGGIQKPMFAPVSQNSKFGEDIDLSDIFSDYFNNMEDPVITSTSTNHSSISGEFKNQDKATIASGMNTLIGSSSIQQPGTSNSSNVTLPTGRGIKTPFHAGHSSNMFSQERKIYQASSQSQDLPPAKKQKHMVLSHQTQQQQQATQNLQEQMSQNQNSQLVSAPLTATETAATGSKTLSKVCHSDSEDQLANSRKDGTEIQENKISNASGGISLPVGVGIRLGSVVPPSTSNRNGITINHTNWGVNPSSASSPTGFASVAGQFGLMAGLGGDSTTRGPGGLSEPAIAERRQRNREHA…	Centric	Bacillariophyta	Coscinodiscophyceae
MATOU-v2.110407317_5	110407317	HAIQTPTIVKYSLQLSFELKQNLHINSLSI*SRQNVDHRIKTRLPTNGFSLVYCRYCIQDENSIFMLAPIMSQPVTIPIFGSTSTQQPQATHQQQAGGSGEWYMDDGEQDMDFDLLAEYLLEENPGTSQSGGVNFDYPDFVVSPEQSVDGAGDTGAQVARDIITQHAATMASTTAPTEPPKTQVVQYAPVAAPPMLVMPPQIAAQGMAVPQTIPQYIPQQQAVMVPAPTTVTSQQQIRVPTRPLQQKKSVEAKRRRPNPPEVAPSGLINTSYMTNGAANMSPAVVAAAAAAAAMQGRGRKKSQAQIDRRRERNRILARRTRLRKKFFFESLQKEVMELQKENSALKDIVRTEIEGEEGRVLLEQCNAARKLPREVLEACGENPDLDQEDFNLVTSIQQS…	Pennate	Bacillariophyta	Bacillariophyceae	Bacillariales
MATOU-v2.110421479_5	110421479	NKLPNYCNMSQQNQQNGTSIQQTQQALPVAVDGSLPTLNIQDHSASIPTNQSTMDKDSNTPGAAPMNTLSLSTQTPIYATSVPSSEAVLAAAVPVKAENVAKAVPMFAPAVHETNSAEISLDLDELFHDCYFGDFPVPNTGPSTLGAPTALATLAPLPTMHVSAPLTTATDMAGSVMLAPVAPTPLMPNNPMVITDVASNMMVSQKRKSDQMISNSAHMSRDMSIPLSTPWADGILSSGMVKKEASKPLTDQQKIERRERNREHAKRSRLRKKFLLESLQEQINGLQGEIDSLKDIIKAECPGKADQLIESVTGPKGKFTPFPMPSGFGPVKTLMQPDFRLMSSLSGSQQNFAISDPSLPDNPIVYCSQGFLDLTGYKLDQVLGRNCRFLQGPGTDQSA…	Centric	Bacillariophyta
MATOU-v2.110424010_6	110424010	ATLVFHREFVDMANYNGLNPAAMNGAVLNGTALSGTQVQAPANLPMFAPGAEAGEDDNSVDLDDLFRDCYFGEFPVPTTATVDAPAPLVSNSEFYSQKQQSPTLKRKAEDQLDGGGESEIQPSVMTVTSADTIASSAAAKKDSSLMKPLTDQQKVERRERNRKHAKRSRLRKKFLLESLQEQINGLQSEIDSLKDIIKKECPDKAEKLLESVSGPTGKFTPLPMPSGFGPVKTLMEPDFRLMTALSGSQQNFAISDPSLPDNPIVYVSQGFLDLTGYSLDQVLGRNCRFLQGPGTDQSAVDIIRKGLREGVDTSVCLLNYKADGTPFWNQFFVAALRDAENNVVNFVGVQCEVSKAVVEKQIAEQKARDDTVTTPPT*RSLIFFSISMSLQVLRVR*LS…	Centric	Bacillariophyta	Coscinodiscophyceae	Chaetocerotales
MATOU-v2.110431153_2	110431153	AAGGQLTAKQKLERRERNREHAKRSRLRKKFLLESLQEQIHGLQEQLDKFKKTIRTEIPAPKAEQLIDEICGHENQYTPLPMPSGFGPVKTLMEPDFRRIVYVSQGFLDLTGYQLDQVLGRNCRFLQGPGTDQSAVDVIRKGISEGIDTSVCLLNYKADGTPFWNQFFVAALRDAENNVVNYVGVQCEVSKAVVEKHMGEHKKK*EDTNQSSIYQSNSHTHAHKISVIQKHSLTMNGLIRSRNEMRRKLKLNLNLRS*N*I*I*AQWVKYMKILKRDEVLLWGPVTRHHIGWEFVVSILMLYIFIVRPLIDAFWC*FKFW*ILNVLCS	Pennate	Bacillariophyta	Bacillariophyceae	Bacillariales
MATOU-v2.110431153_2	110431153	AAGGQLTAKQKLERRERNREHAKRSRLRKKFLLESLQEQIHGLQEQLDKFKKTIRTEIPAPKAEQLIDEICGHENQYTPLPMPSGFGPVKTLMEPDFRRIVYVSQGFLDLTGYQLDQVLGRNCRFLQGPGTDQSAVDVIRKGISEGIDTSVCLLNYKADGTPFWNQFFVAALRDAENNVVNYVGVQCEVSKAVVEKHMGEHKKK*EDTNQSSIYQSNSHTHAHKISVIQKHSLTMNGLIRSRNEMRRKLKLNLNLRS*N*I*I*AQWVKYMKILKRDEVLLWGPVTRHHIGWEFVVSILMLYIFIVRPLIDAFWC*FKFW*ILNVLCS	Pennate	Bacillariophyta	Bacillariophyceae	Bacillariales
MATOU-v2.110437100_2	110437100	VGNYCLSLKVSHQEKLRNQKVFQIQ*NIKLYISSMLGTFSTMSQPVTVPIFGSNSSQNPPQAGEQQQDGSASGWYPPMDDGGDQDMDFDLLAEYLLEENPTVNQSEGVSFDFNNEFVVSPEQSIDGRGDSGAAKARDIITQHAATIATTVTSNPASAATTTVASTNQPQRLQQQRVMYAPVAAPPLLVAPSAPPQLAAQGMAVPRTITQYSSQPAMAPVPVMSYDGASTVLRTTTKAPKTGGATAEAKRRRINPPEVAAQGLINASYLTNPANMSPAVVAAAAAAAAMQGRGRKKTQAQIDRRRERNRILARRTRLRKKFFFESLQKEVMELQRDNAALRDIVRTEVEGEEGRKLLEQCNAARQLPREVLEACGGENPDLDTEDFNLITSIQQSQHSFV…	Pennate	Bacillariophyta	Bacillariophyceae	Bacillariales
MATOU-v2.110439843_1	110439843	PMPSFAPASSIAYKSGDDKIGQELGFQNNGDTLDFDLLAEYLLEDHMAVTPSACTGDVTQSSKGFASALNSCTLAFQGGAGWTVGRAADQDQYAFADPLADGTIPLTHGTGPQTNNTHPAGNFVQVQPVGVVPAPVSSAPLAHLGMTLPAPACSTLPASAPNLPRTGGSDMLVYHHAVPSSSANKRPYPDISANSSVSKGTLSRQMDCVHYLPGGKKQKNQAQIDRRRERNRILARRTRLRKKFFFESLQKEVTDLQRENTVLKEIVKAKLDAEIAVAVLGVSRLPCWRSSISCSGEF*R*RH*S*SARF*FGL*FEKVPTMFCNYRPKLARQPNCLCK*RLFASYWLFS*RSARTQLPLFARRRHKS*KG*DDHKASTQVLKRLR*SERVLCKERMSE…	Centric	Bacillariophyta
MATOU-v2.110439843_3	110439843	YAQLRSCFFNCVQIGRR*NWTRIGFPKQW*HSRF*SSGGISFGRSYGSYTIGMHW*CYSKQQRIRFCTQFVYASISGGCRLDSRESS*SGPVCLR*PFS*RNDTTHTWNGASN*QYAPCRKLCASPTCRCGTCTCFLCSSCTLGHDFTCTCMLNTSS*CSESSSYRRK*YACLSPCCTLI*CK*TSLS*YLCEQLCF*RNFKQTNGLCPLSTWRQETEKSGTN**TKGTQPYTG*TNTST*KILF*IIAKRSDRLAARKYSFKRNCKGQIRCRDCGCCVRC*QTAMLAIFHQL*WRILKMTPLILISKILIWFVV*KSPNNVL*LQTQACKTTQLSMQVKTFCKLLAILVTKC*DATAAFCKASTQVLKRLR*SQGVDTSPEKVEMIRKSLMQGEDVRT…	Centric	Bacillariophyta
MATOU-v2.110457551_3	110457551	RLQL*RRRD*TLMIRIIPS*DLFSA*IPSLKL*R*TL*TSARSPYSTFIAFLGLEVFHLQHHHHLKSFLIDYRFGAIFNSHPPHRKQESQNQTFDSITDLR*RTRSTLNTDDT*WDSWSN*YCVLEEKLVSEHKQHNKRQHVETSKFIK*IEIRLSSHHQYLHFTTKINCQYVSRNTTTVICFCLCARPGRRF*LE*DFCRVLH*RI*KSCQCLHKCYGKLCCSSRKRSCARFSKYGSRSDQLCSSTCYCTANAATWGEQWNKNSLSFRSCHSCSSGSGRAAATTANSEYGIAHSKKSEA*TGNNKINYDSERGRDGWSHKSTGIQYRASTSWRPGWNGTSNGRR*KWYFTSRSSRVNDTRPTAAATRIIRSTSATKHRCSSSCWTRYSAWRCRRGGSS…	Pennate	Bacillariophyta	Bacillariophyceae	Bacillariales
MATOU-v2.110459749_1	110459749	IATTGLQRPDAAATVMGNISGATPSTVPMVQAPHRKHHLQFVSVESGGNRAPTSVGVGGSTLDGDLKQTLSGSASVVAKTDGSNKSADRRQETRGQYLFHFCCDHFSFPQFVIQPPQFQLTVKLSRSVTVCR*K*NCQGA*P*ARKAISNSQEVPA*IPSAKCFVA*RRERKTKERNKKPFRRRSRWPSKRKGLSRCSRCRRRTYCQQFC*CQQSPG*SRFFLHQGIADSSAKLCCH*S*SS*QPNCVCNTRVS*GRNCRFLQGPETDPKAVEKIRTAIEEGSDMSVCLLNYRVDGTTFWNQFFIAALRDAGGNITNYVGVQCKVSDQYAASVCKKQEEADTAAALVVDGADLKQDS**SMVAD*KQQYQRRDGSIHVLENPX	Centric	Bacillariophyta	Coscinodiscophyceae
MATOU-v2.110466869_6	110466869	QTPVHNQHTNHHSTHFQHAARHPGAPIQIQSQDQNQIQSQNQNQNQNQNQNQNFNTMMNPVSGQGVVVTNGTIPPQFIAPMLSNQAQHAISTRGTAATLNLDDIFEDCFFTPEGDTVFLSEQTDINTARSGEGNGNNTNVNTDALRPGMISTINSTNSSNLDVNTSTSNPVHVNIAGTGQGLVPRSINSFNPSPTNMSMNYSNMQLSGETVVTNVASRPVPVPAPGPAIIPSNPSAMNINPPQASVPALPISVTTQFMPVPFGGGISTTGLQNSQNRATVMGMVMGPGSTPVNTLAPVQPHKYIPMAHPPHQRHHLQYITTSCPSTTPNPTAGIPLPSTDAKRSAISQGGPNPNLSRERKMSETQKNERRERNREHAKRSRIRKKFLLESLQQSVSLLK…	Centric	Bacillariophyta
MATOU-v2.110492764_6	110492764	EMMKNEPANGGPGEPPPPASSSGLQHVAASLAAAGSMAASASESTGGGSGGAPQPTVVTSATATTKKRSADAITSGGGEEVGLDGKPTTGSSGQLTAKQKLERRERNREHAKRSRLRKKFLLESLQEQIHGLQEQLEKFKTTIRTEIAAPKAEELIDAICGDENQYTPLPMPSGFGPVKTLMEPDFRLMSALSGSQQNFAISDPTLPDNPIVYVSQGFLDLTGYQLDQVLGRNCRFL	Pennate	Bacillariophyta	Bacillariophyceae	Bacillariales
MATOU-v2.110510429_6	110510429	PRLPDNPIVYASDGFYQLTGYTREQVLGRNCRFLQGPGTDPKAVDVIRTAVANGTDATTCLLNYKADGTPFWNQFFVA	Centric
MATOU-v2.110562630_2	110562630	SIEEGTDMSVCLLNYRVDGTTFWNQFFIAALRDAAGNITNYVGVQCKVSDQYAANVCKKQEEEFAMFDDQAQTQAQAPEEAHTATQPQYQAPAPSELAQTNLTAHPAATVPVPAPVLPVAAPVPAPVLPVAAPVLPVAAPVLVTPVVT	Centric	Bacillariophyta	Coscinodiscophyceae	Chaetocerotales
MATOU-v2.110579466_3	110579466	TSV*FDSSY*LRMAIAIRKQAPLIFM*A*FLLRNFHSVTVWNMPSVALPRFIPHSQSKNEDVNDIGEQFDFDLLEEYLLDETTSSGLNDGFEFGNDTPTAAYQHSGTVSPDCSDDQVADLLPNSVQQNHPSHNLQNRSYVPSLAPTIPTPVPLAPAPAPLAPSPLAPSHIAPAPVPLAPAPAPAPLAPAPAPLTAPKTTVRSEVSPMSAAPILLTAPPIPPTVPAAHSITLHQHKRPRKDVSAPIQVMQLPLKSTSSSGTLTASRNQLMQHLAPRSSRQKSQAQIDRRRERNRILARRTRLRKKFFFESLQKDVTDLQKENLALKEIVRAKIDENEANTILEDCKANEGIPTIVSEQCGDPSLLDRHDFNLYNSIQRSQQCFVISDPSLQDNPIVYASN…	Centric	Bacillariophyta
MATOU-v2.110661315_4	110661315	LMDDGQYKAHIAGGGLATTQMLDPSKNSSAMGIAATQTVPTSQSVPFQRAPQAQHHLQYAAPKKKKKGSKDRKMSDQQKTDRRERNREHAKRSRIRKKFLLESLQQSVALLK	Pennate	Bacillariophyta	Bacillariophyceae
MATOU-v2.110694028_6	110694028	EIFA*GENFREREIREKERDT*LT*IRRFIVSTRTHTYRGLNF*I*IITTMSTVPPNPPSNGTGNEAPMPMFQMSNANAVSERRSSFNSMNGGISGGMDIGQLDLEELFVDCYYDVPGMAEMVKNEPANGGAGVAAAPVPVAQKQEATFPGQIAISSVAASLAAAVPPTVVAGDHYSTLEMIVPPQPTMVTSESTAPTSIGDDRKRSADEITSSGDVGDEKANGGQLTAKQKLERRERNREHAKRSRLRKKFLLESLQEQIHGLQEQLDKFKKTIRDEIPAEKAESLIDAICGHENQYTPLPMPSGFGPVKTLMEPDFRLMSALSGSQQNFAISDPTLPDNPIVYVSQGFLDLTGYQLDQVLGRNCRFLQGPGTDQSAVDVIRKGISEGIDTSVCLLNY…	Pennate	Bacillariophyta	Bacillariophyceae	Bacillariales
MATOU-v2.110696892_6	110696892	DDFSHPVSKDSFLMANAVFSDPAFVDFSLPEDVTSGVLGSYRLPEDLPSGPFDFGAAVNAGAARAKPMADQTGLKTITAPLRSRAKKRTADQAGLKTTEPPSSLIERRARNRDHARRSRLRKKFLLDSLKEQIERLKGEKEALKSIIRQELPASAARLLQGAGYGLEEWDEGSTTAAGSERIPCSLPMRAVMITDPNLPDNPIVYVSQGFLDLTGYALDQVLGRNCRFLQGPDTDQAAIDVIRRGVKEGTDTSVCLLNYRADGTPDTSACLLNYREDGTPFWNQFFVSALKDDEGHVVNYLGVHCKVSKVVVEM*HYWPQLYCRHGVCE*YRVKDDVVVHHEPVSSSEHLGWEAHED*KFISANAIAANVCITCCT*AAX	Centric	Bacillariophyta
MATOU-v2.110696892_6	110696892	DDFSHPVSKDSFLMANAVFSDPAFVDFSLPEDVTSGVLGSYRLPEDLPSGPFDFGAAVNAGAARAKPMADQTGLKTITAPLRSRAKKRTADQAGLKTTEPPSSLIERRARNRDHARRSRLRKKFLLDSLKEQIERLKGEKEALKSIIRQELPASAARLLQGAGYGLEEWDEGSTTAAGSERIPCSLPMRAVMITDPNLPDNPIVYVSQGFLDLTGYALDQVLGRNCRFLQGPDTDQAAIDVIRRGVKEGTDTSVCLLNYRADGTPDTSACLLNYREDGTPFWNQFFVSALKDDEGHVVNYLGVHCKVSKVVVEM*HYWPQLYCRHGVCE*YRVKDDVVVHHEPVSSSEHLGWEAHED*KFISANAIAANVCITCCT*AAX	Centric	Bacillariophyta
MATOU-v2.110696893_6	110696893	TATATATAAAQEAKYNSNTTSAAMRLLLAPDSNTREESDSRPDSRPCVHSVSADSFSRSTTSWQDDFSHPSLMANAVFSEPASVDYSLPEDVTIGALGSYRLPEVVPSGPFDFGAAVMNVSTAGAKPMADRADLKTTTATSSRSRAKKRTADQAGLKMTEPPSSLIERRARNRDHARRSRLRKKFLLDSLKEQIERLKGEKEALKSIIRQELPASAARLLQGAGYGLEEWDEGSTTAAGSERIPCSLPMRAVMITDPNLPDNPIVYVSQGFLDLTGYALDQVLGRNCRFLQGPDTDQAAIDVMRRAFKEGTDTSACLLNYREDGTPFWNQFFVSALKDDEGHVVNYLGVHCKVSKVVVEM*HYWPQLYCRHGVCE*YRVKDDVVVHHEPVSSSEHLGWE…	Centric	Bacillariophyta	Coscinodiscophyceae
MATOU-v2.110700915_6	110700915	RNRILARRTRLRKKFFFESLQKDVTDLQKENMALKEIVRSRISAKEAKPILERCKAMEEIPSVVLQQCGDLSMMDHQDFNLCTAINKSQRCFVITDPSLQDNPIVYVSDDFLTLTGYSRPEVLGRNCRFLQGAETCKKKMSTIRDNIENGNDVSVTFVNYKADGTAFWNKLFIAALRDAQNNIVNFIGVTVQVGGPEPDDPEAGKMLPGENSCDGNQSLGGCDNNVDADAAVMAIEGAVTAAVAAAPPIVTNEIKMEGEE*SRVQHVVSNIFNLTIEQFQFK*VCVHLVVWNIFNFSTELFDCK*PH*LR*S*PR	Centric	Bacillariophyta	Coscinodiscophyceae	Chaetocerotales
MATOU-v2.110720944_3	110720944	VSAVAHCTDTTPRK*LRGFKARHSKRIV*LEERFSIAKLLCAHAPYL*ILINFLGVYLFLVQQRQ*FFFKSTEVANSRGKVDKLSFSSPDLVRTHFK*DSEI*TKVMSGAVSMMYSVPMPSFAPASSIAYKSGDDKIGQELGFQNNGDTLDFDLLAEYLLEDHMAVTPSACTGDVTQSSKGFASALNSCTLAFQGGAGWTVGRAADQDQYAFADPLADGTIPLTHGTGPQTNNTHPAGNFVQVQPVGVVPAPVSSAPLAHLGMTLPAPACSTLPASAPNLPRTGGSDMLVYHHAVPSSSANKRPYPDISANSSVSKGTLSRQMDCVHYLPGGKKQKNQAQIDRRRERNRILARRTRLRKKFFFESLQKEVTDLQRENTVLKEIVKAKLDAEIAVAVLAD…	Centric	Bacillariophyta
MATOU-v2.110722176_6	110722176	CFYCMDCTTVQEVNLVYEHEDVLTIINN*YDLASSSCSLIFFDQGLFGGVSPPTIISRSSTDLNWIKDQKRDKVTIRFSKIIRRL*VRAILAFV*IRFTSTQS*RSTGINYNSVSTVI*NHHYHSNAVVTSSHRCNPAHFDYCIRLTVFHIIQ*GVSVNMSSGIQQPLFASASAQGQGDDFDLNEIFAEYFISEFENPVNAYTNAMGNYVATPGNTATTAAIENHPAAPTNTLTNTFAPAPTITVQQPLQQPGLSSGIRTAYHSAVAAPLAPTPVASVQRQQQQNQSMGGLPIAKKAKIEPGVTAKLHVITTANVATTGGVTSRLGFNTENLQQGGTHIMPGGFHVNPASTATLAQQQQQHQQGSFGLHQQQGSGVALPVGRGIRLGGAGGVAPATAQK…	Pennate	Bacillariophyta	Bacillariophyceae	Bacillariales
MATOU-v2.110733608_5	110733608	ALFAGRDQECYYLL*ILCFIMSDHQNVLQKPVFAPVSQGNKLVDDIDLSDIFAEYFNEGGDDPLTTFSNPSICGDAAAAGQRIQQQQVQQISSILTPFGTPQTIDPGFTIGTRNATLPRSQGIKTPYHAGLKQEPQIQSTSQVQQVPPPKKMKSEHLPTQYQQVVPAPTLSRIMQVPGINPLGVAVRTQTPGGINPLGVAARTQTPGINPLCVIERMHNPDINQVGGGGKMQASSIDPHGVTGGQSRRGLSGRLGISMVGGQLSIPQTNSAGIRPVVSQDAKLPFVCSSTPLPVGRGIRVGNIIPQATSSAPLNQSRSITGSSTNIGATITPTQNNYSSWIGLGGMGGGPGGMSETAIAERRQRNREHAKRSRVRKKFMLESLQHEVRDLQKENNNLRM…	Centric	Bacillariophyta	Coscinodiscophyceae	Chaetocerotales
MATOU-v2.110737970_4	110737970	HRPRIVYATQGFLDLTGYTLDQVLGRNCRFLQGPETDPRAVEKIRRSIEDGSDMSVCLLNYRVDGTTFWNQFFIAALRDAAGSITNYVGVQCKVSDQYAANVCKKQEEEDARAADGEGGSDAVMGE	Centric
MATOU-v2.110759255_2	110759255	LVVDVLLWSSLGLRVW*LLKENSFVINGGYNSAQIDRIAVREAEIHHLHTE*RHFIRN*RWIQLRTNRQDCSQGGRDTSPT*REEIIHS*LSVDTTRTNRQDPVREAEIHQLRKDNPFVINGGYNCAQIVKIAVREAEIHHLHTGARYERIR*YHSRH*RP*CAGTGVADIVGAGPDEQLQHERRATASARPSCLGGECVR*YAGAGVGGLIGAGSEQPQQKQNERHAIVRAGSQCAGGECK*QLSFILAPEFAQADPRLIHLCCPVVLPSSHMQTQLDLDELFHDCYFGDFSMPEDVPSAAPPAAPKRTADQAGLPIPADTTTTPRAPTSAGRKAGGRVRRQPSVEDGGLSARPTASLTDGQKVERRTRNREHAKRSRLRKKFLLESLQEQVDGLQDE…	Centric	Bacillariophyta	Coscinodiscophyceae
MATOU-v2.110759256_3	110759256	S*LMYCCGRVWG*ESGNC*KKIHS*LTVDITALKSTGSQSGKQRYITYIPSRDISFVINGGYNCAPIDRIAVREAEIHHLHNEKR*FIRNYRWIQRAQIDRIQSGRQRYIN*GKIILS*LTVVTTVLKSSRSQSGRQRYITYTPGHDMSGFVNIIADIDGPDVLEPASLTLSAQDPTNNYNTSAVQLLAPGPHALGVNVCADMPEPASVASLAPDPNNHNKNKTSAMQLFAPDPNAPGVNTQLDLDELFHDCYFGDFSMPEDVPSAAPPAAPKRTADQAGLPIPADTTTTPRAPTSAGRKAGGRVRRQPSVEDGGLSARPTASLTDGQKVERRTRNREHAKRSRLRKKFLLESLQEQVDGLQDEISTLKSIVHRELPDRAEGLLKDVGYGPDGGDDGPG…	Centric	Bacillariophyta	Coscinodiscophyceae
MATOU-v2.110765132_2	110765132	TNKEKIKKKKMADVPPPLFAPSQGGSTESKSNGDRHMNLDDIFGDVMFTPEGDTVFMSEENAEGRVANSGEGSDVKINASSLLDDGQYKAHVAGGGLATTQMLDPSNKATAMGSADTQGVPSSQSVPFQRAPQAQHHLQYAAPKKKKKGSKDRKMSDQQKTDRRERNREHAKRSRIRKKFLLESLQQSVALLKEENEKLKQSLKKHLGDEKGSALIQGKESSNGGGGNEGLLASSQGIANKVLDDPDFSFIKALQTAQQNFVVTDPSLPDNPIVYASQGFLNLTGYSLDQILGRNCRFLQGPETDPKSVDRIRKAIIGGNDMSVCLLNYRVDGTTFWNQFFIAALRDAAGNVTNFVGVQCKVSDHYAATVTKQQQEEEEMDAEDQ*ATLKLEYSLFV*S…	Pennate	Bacillariophyta
MATOU-v2.110775010_6	110775010	MANYNGLNPTALNAAAMNGTQLQAPGALPMFMPGVDGGEDDNSVDLDDLFRDCYFGDFPVPTTATVDAPAPLVSNSEFYSQKQQSPNNITLKRKAEDQLDGVGESEIQSSVLPVATADTIPSSAAAAKKDSSVMKPLTDQQKVERRERNRKHAKRSRLRKKFLLESLQEQINGLQSEIDALKDIIKKECPAKAEKLLESVSGPTGKFTPLPMPSGFGPVKTLMEPDFRLMTALSGSQQNFAISDPSLPDNPIVYVSQGFLDLTGYSLDQVLGRNCRFLQGPGTDQSAVDIIRKGLREGVDTSVCLLNYKADGTPFWNQFFVAALRDAENNVVNFVGVQCEVSKAVVEKQIAEQKARDDTGTTPPT*NTLYPSAINVSIRSPEGR*VSSWVRNNTAQEVQ…	Centric	Bacillariophyta	Coscinodiscophyceae	Chaetocerotales
MATOU-v2.110775642_2	110775642	KERSRERNREHAKRSRIRKKFLLESLQQSVSLLKEENEKLRSSIRFHLGDPQADEVLRDENLADVAAAASNPRNGGSSVTAYASTTX	Centric	Bacillariophyta
MATOU-v2.110781146_6	110781146	TALNGNGTQGQILGPALPAALPAALPTTLPTTLPTALPTALSTALPTVLPTVLPTVLPTVLPTALPMFMPQTEGGHEDDNSVDLDDLFRDCYFGDFPVPTTATSDAPAPLVSNSEFYSQNQQSPNITLKRKAEDALDGGGESEIQSSILPVTSADAVSSSAAAAAAAKKDPSAMKPLTDQQKVERRERNRKHAKRSRLRKKFLLESLQEQINGLQSEIDSLKDIIKKECPEKAEKLLESVSGPTGKFTPLPMPSGFGPVKTLMEPDFRLMTALSGSQQNFAISDPSLPDNPIVYVSQGFLDLTGYSLDQVLGRNCRFLQGPGTDQSAVDIIRKGLREGVDTSVCLLNYKSDGTPFWNQFFVAALRDAENNVVNFVGVQCEVSKAVVEKQIAEQKARDDT…	Centric	Bacillariophyta	Coscinodiscophyceae	Chaetocerotales
MATOU-v2.110795962_5	110795962	SQGIANKVLDDPDFSFIKALQTAQQNFVVSDPSLADNPIVYASQGFLNLTGYSLDQILGRNCRFLQGPETDPKAVDRIRKAIVEGNDMSVCLLNYRVDGTTFWNQFFIAALRDADGNVTNFVGVQCKVSDHYAATVTKQX	Pennate	Bacillariophyta
MATOU-v2.110799483_6	110799483	AQINKAHPMPPAPPQESREKTEAQVDRRRERNRILARRTRLRKKFFFESLQKDVTDLQRENAALKSIVRSCLKPX	Centric
MATOU-v2.110801449_2	110801449	GTPFWNQFFVAALRDSDNCIVNYVGVQCAVDSNAGASALEDKVNSVLPLQNRGESPTHDGSK*YQRWLLTRNKNFNIQHPVFCSIX	Centric	Bacillariophyta	Coscinodiscophyceae	Chaetocerotales
MATOU-v2.110833191_3	110833191	GFGPVKTLMEPDYRLMSALSGSQQNFAISDPSLPDNPIVYVSQGFLDLTGYALDQVLGRNCR	Centric	Bacillariophyta	Coscinodiscophyceae
MATOU-v2.110847399_4	110847399	EDGVVNSGEGSDVKINASSLMSDGQYEAHIAGGGLATTQMLDPSKNATAMGTADTQVVPSSQSVPFQRAPQAKHQLQYAAPKKKKKGTKDRKMSEQQKTDRRERNREHAKRSRIRKKFLLESLQQSVALLKEENEKLKQSLRQHLGEEKGSELIDGKETANGGGGNEGLLASSQGIANKVLDDPDFSFIKALQTAQQNFVVTDPSLPDNPIVYASQGFLNLTGYSLDQILGRNCRFLQGPETDPKAVDRIRKAIIGGNDMSVCLLNYRVDGTTFWNQFFIAALRDAAGNVTNFVGVQCKVSDHYAATVTKQQQEEDIMGFDAGDQ*AQLKLEYSLFLL**YI*LVCLER*YYIDQVMLSPMSK	Pennate
MATOU-v2.110869261_1	110869261	PMPSGFGPVKTLMEPDYRLMSALSGSQQNFAISDPSLPDNPIVYVSQGFLALTGYALDQVLGRNCRFLQGPGTDQAAVDVIRRGVGEGTDTSVCLLNYKADGTPFWNQFFVAALRDAENNVVNFVGVQCEVSKAVVEKHISEGKTPPG**GX	Centric	Bacillariophyta	Coscinodiscophyceae
[truncated: 813 more rows]

## Sheet: Sheet6
Genome_Id	Region	Source	Best_taxonomy_KINGDON	Best_taxonomy_PHYLUM	Best_taxonomy_CLASS	Best_taxonomy_ORDER	Best_taxonomy_FAMILY	Best_taxonomy_GENRE	total_length	num_contigs	N50	GC_content	percent_completion	percent_redundancy	Presence_DPH	Presence_Aureo
[truncated: 53 more rows]
